# Supplementary material for: Targeting Orphan G Protein-Coupled Receptor 17 with T0 Ligand Impairs Glioblastoma Growth
Source: MDPI journal article supplement (doi:10.3390/cancers13153773), 2021-07-27
Supplement: s1 [file s1]

# Targeting orphan G Protein–Coupled Receptor 17 with T0 ligand impairs glioblastoma growth

Phuong Doan<sup>1,2,3#</sup>, Phung Nguyen<sup>1,2,3#</sup>, Akshaya Murugesan<sup>1,2,3</sup>, Kumar Subramanian<sup>1,2,3</sup>, Saravanan Konda Mani<sup>4</sup>, Vignesh Kalimuthu<sup>5</sup>, Bobin George Abraham<sup>6</sup>, Brett Stringer<sup>7</sup>, Kadalmani Balamuthu<sup>5</sup>, Olli Yli-Harja<sup>8,9</sup> and Meenakshisundaram Kandhavelu<sup>1,2,9,\*</sup>

<sup>1</sup> Molecular Signaling Lab, Faculty of Medicine and Health Technology, Tampere University, P.O. Box 553, 33101 Tampere, Finland

<sup>2</sup> BioMediTech Institute and Faculty of Medicine and Health Technology, Tampere University, Arvo Ylpön katu 34, 33520 Tampere, Finland

<sup>3</sup> Department of Biotechnology, Lady Doak College, Thallakulam, Madurai – 625002, India

<sup>4</sup> Shenzhen Institutes of Advanced Technology, Chinese Academy of Sciences, Shenzhen, Guangdong, China

<sup>5</sup> Department of Animal Science, Bharathidasan University, Tiruchirappalli-620024, India

<sup>6</sup> Faculty of Medicine and Health Technology, Tampere University, P.O. Box 553, 33101 Tampere, Finland

<sup>7</sup> College of Medicine and Public Health, Flinders University, Sturt Rd, Bedford Park South, 5042, Australia

<sup>8</sup> Computational Systems Biology Group, Faculty of Medicine and Health Technology, Tampere University, P.O. Box 553, 33101 Tampere, Finland

<sup>9</sup> Institute for Systems Biology, 1441N 34th Street, Seattle, WA, USA

\* Correspondence: meenakshisundaram.kandhavelu@tuni.fi; Tel.: (+358)417488772

# Equal Contribution

## Supplementary Figure 1

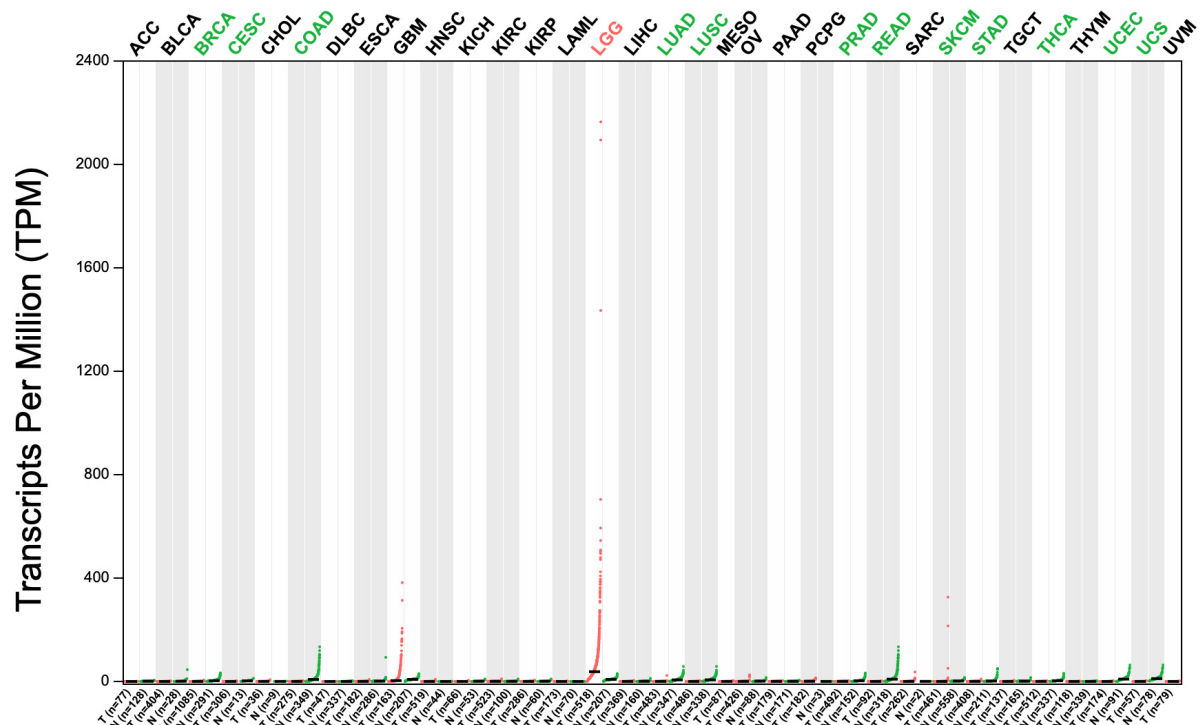

Supplementary Figure 1: *GPR17* expression profile across all tumor samples and paired normal tissues. Dots represent expression in individual samples.

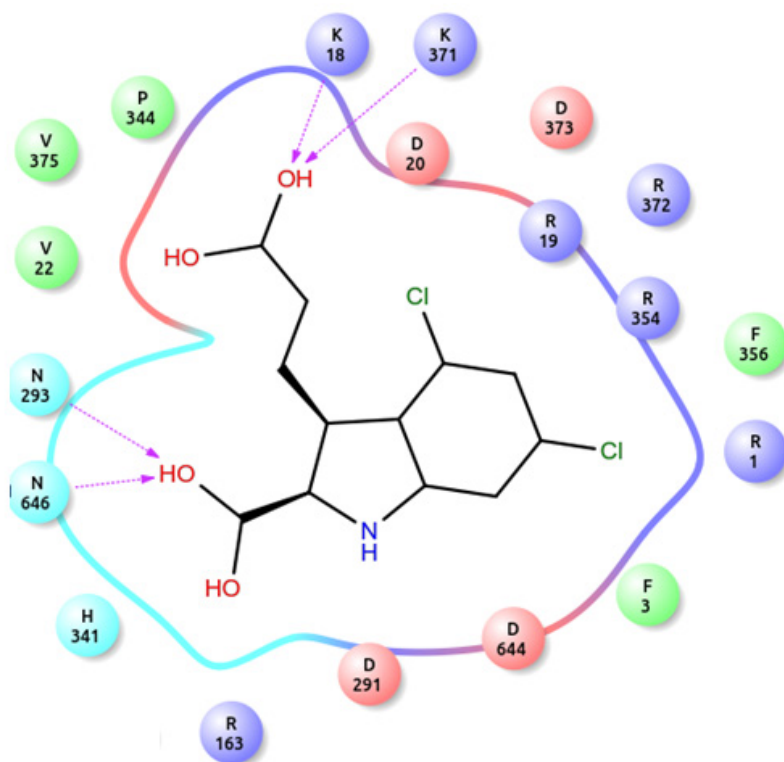

Supplementary Figure 2. Two-dimensional interaction diagram for MDL 29,951-protein complex.

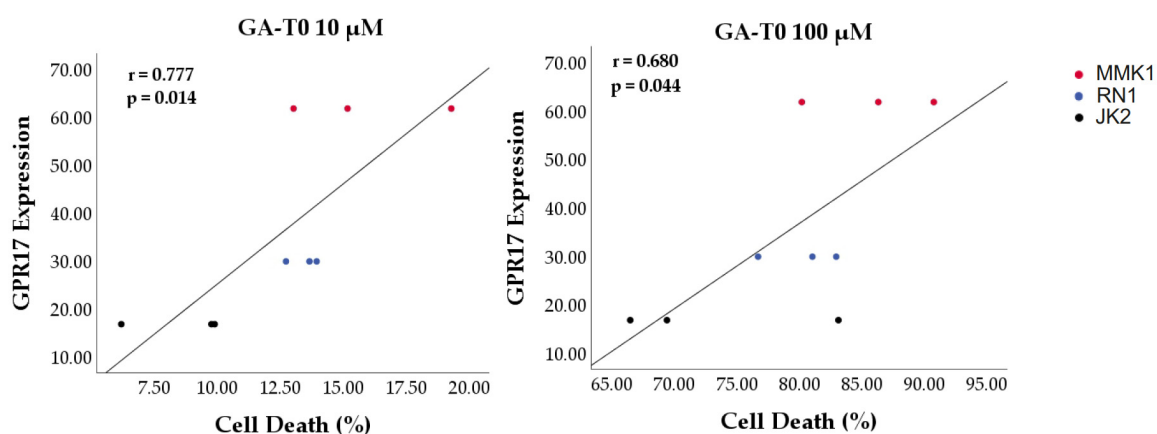

Supplementary Figure 3. Correlation between GPR17 expression and percentage of cell death in three Patient derived cell lines treated with 100 µM and 10 µM of GA-T0. Spearman's (p) and Pearson's (r) correlation between the two values are shown.

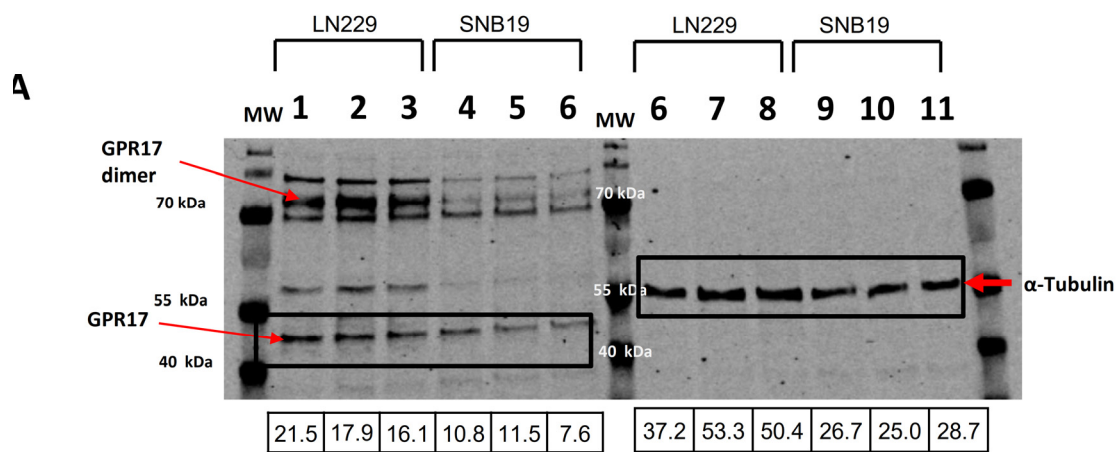

Signal / intensity ratio from the above western blot

|                          |       |      |      |       |      |     |  |
|--------------------------|-------|------|------|-------|------|-----|--|
|                          | LN229 |      |      | SNB19 |      |     |  |
| GPR17                    | 21.5  | 17.9 | 16.1 | 10.8  | 11.5 | 7.6 |  |
| $\alpha$ -tubulin/ GPR17 | 1.7   | 3.0  | 3.1  | 2.5   | 2.2  | 3.8 |  |

|  |       |      |      |       |      |      |                   |
|--|-------|------|------|-------|------|------|-------------------|
|  | LN229 |      |      | SNB19 |      |      |                   |
|  | 37.2  | 53.3 | 50.4 | 26.7  | 25.0 | 28.7 | $\alpha$ -tubulin |

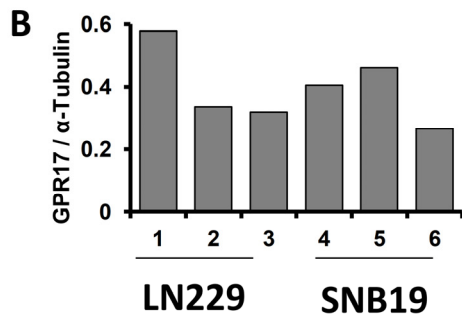

Supplementary Figure 4: A) Western blot analysis of GPR17 receptor protein expression in LN229 and SNB19 cells. MW: Molecular weight standard; Lane 1-3: LN229 triplicates; Lane 4-6: SNB19 triplicates;  $\alpha$ -Tubulin as a loading control: Lane 6-8 for LN229 triplicates and Lane 9-11 for SNB19 triplicates. The figure also shows the densitometry readings/intensity ratio of each band. B) Histogram showing the densitometric analysis of GPR17/ $\alpha$ -Tubulin for LN229 (1-3) and SNB19 (4-6) cells.
