# Supplementary material for: Targeting Orphan G Protein-Coupled Receptor 17 with T0 Ligand Impairs Glioblastoma Growth
Source: Cancers (Basel). 2021 Jul 27;13(15):3773. doi: 10.3390/cancers13153773 (PMC8345100; doi:10.3390/cancers13153773)
Supplement: Supplementary file 1 [file cancers-13-03773-s001.zip › Supplementary Table S1.xlsx]

## Sheet: Table S1_LN229
Supplementary Table S1. The list shows the genes that were differentially expressed in GA-T0 vs Untreated in the cell type analysis using DESeq2
ENSEMBL	ENTREZID	SYMBOL	GENENAME	baseMean	log2FoldChange	padj
ENSG00000168672	157638	FAM84B	family with sequence similarity 84 member B	2355.56179508407	-2.48366742956135	0
ENSG00000173546	1464	CSPG4	chondroitin sulfate proteoglycan 4	12633.9942948613	1.65962069786885	0
ENSG00000136960	5168	ENPP2	ectonucleotide pyrophosphatase/phosphodiesterase 2	2026.73113088584	-1.94935751310662	6.19826562044969e-233
ENSG00000125870	6629	SNRPB2	small nuclear ribonucleoprotein polypeptide B2	7395.36750526835	-1.75452247199274	3.63194078157425e-219
ENSG00000164434	2173	FABP7	fatty acid binding protein 7	828.495619973522	-2.70668352126801	6.22159505004987e-211
ENSG00000184792	23762	OSBP2	oxysterol binding protein 2	866.002594934963	-2.64756610812318	2.28870369693743e-200
ENSG00000150893	341640	FREM2	FRAS1 related extracellular matrix protein 2	2353.47931679547	-1.69144105047701	8.56009179279834e-191
ENSG00000101938	91851	CHRDL1	chordin like 1	876.626151292928	-2.67172238693639	1.31067475810008e-187
ENSG00000169429	3576	CXCL8	C-X-C motif chemokine ligand 8	996.763401295949	5.58927950805225	3.05588206049444e-183
ENSG00000102996	4324	MMP15	matrix metallopeptidase 15	1674.00751924523	-1.88141860528567	1.37327677195826e-179
ENSG00000128567	5420	PODXL	podocalyxin like	1644.75974797338	-1.7888679748937	8.72183139395345e-175
ENSG00000175130	65108	MARCKSL1	MARCKS like 1	5380.96869802015	-1.58419453450333	5.44000313938326e-174
ENSG00000130589	85441	HELZ2	helicase with zinc finger 2	1676.10123798494	2.81130073317332	1.68842720164282e-169
ENSG00000124126	57580	PREX1	phosphatidylinositol-3,4,5-trisphosphate dependent Rac exchange factor 1	1772.83467471712	-1.72078669476839	1.32396550373236e-167
ENSG00000157766	176	ACAN	aggrecan	472.414499477455	-3.02827160744689	3.17176092122674e-162
ENSG00000161011	8878	SQSTM1	sequestosome 1	4291.346710829	1.50576125786974	2.38469175932461e-152
ENSG00000073756	5743	PTGS2	prostaglandin-endoperoxide synthase 2	1189.26920002371	2.38296630342643	5.24057682110193e-152
ENSG00000163171	10602	CDC42EP3	CDC42 effector protein 3	2297.5439301611	-1.56155292675369	5.2296210075228e-148
ENSG00000122641	3624	INHBA	inhibin beta A subunit	2978.86801883048	1.48586877403949	8.90685909161281e-147
ENSG00000144136	6574	SLC20A1	solute carrier family 20 member 1	4239.52238734696	-1.30143080321097	2.79910022081928e-146
ENSG00000164176	10085	EDIL3	EGF like repeats and discoidin domains 3	1722.21598097085	-1.60046693294841	3.77338907774426e-146
ENSG00000155850	1836	SLC26A2	solute carrier family 26 member 2	5402.67707610768	-1.31266632887978	1.23140929457257e-144
ENSG00000137312	10211	FLOT1	flotillin 1	3637.75709105028	-1.39220355452429	1.33539589492912e-143
ENSG00000159176	1465	CSRP1	cysteine and glycine rich protein 1	4603.55945267324	-1.24945695944099	1.33539589492912e-143
ENSG00000106278	5803	PTPRZ1	protein tyrosine phosphatase, receptor type Z1	3478.6110777565	-1.26497180400678	1.57223261507134e-139
ENSG00000157873	8764	TNFRSF14	TNF receptor superfamily member 14	977.268591710265	3.59533110305869	3.9245745568581e-138
ENSG00000135048	23670	CEMIP2	cell migration inducing hyaluronidase 2	4457.04938729666	-1.28303803769269	3.45253812248283e-137
ENSG00000112144	22858	ICK	intestinal cell kinase	1401.85512480289	-1.90187388081789	1.1645391043516e-136
ENSG00000167772	51129	ANGPTL4	angiopoietin like 4	728.026261543246	4.93035779674504	1.1645391043516e-136
ENSG00000111674	2026	ENO2	enolase 2	1685.83182949974	2.26864421804847	2.75490183377247e-134
ENSG00000099194	6319	SCD	stearoyl-CoA desaturase	5828.17118079273	-1.1946500466166	9.98620086922386e-132
ENSG00000154678	5137	PDE1C	phosphodiesterase 1C	1748.93702268927	-1.54192757058335	4.72985366993344e-131
ENSG00000161091	126321	MFSD12	major facilitator superfamily domain containing 12	11280.5901445111	1.00686848967517	2.3066046711603e-122
ENSG00000167552	7846	TUBA1A	tubulin alpha 1a	1470.02134740024	-1.51800878063742	7.383790467806e-121
ENSG00000176171	664	BNIP3	BCL2 interacting protein 3	1393.48234290448	1.83643082612109	7.68626139374524e-121
ENSG00000104419	10397	NDRG1	N-myc downstream regulated 1	2429.86278771036	1.73587426607812	1.53237185456932e-118
ENSG00000106537	27075	TSPAN13	tetraspanin 13	2224.59152418371	-1.40810456274522	1.1334986606415e-116
ENSG00000124942	79026	AHNAK	AHNAK nucleoprotein	8743.32362379441	1.17631030942067	1.8181812094187e-116
ENSG00000146674	3486	IGFBP3	insulin like growth factor binding protein 3	1186.98391748441	2.23848375006594	2.35428058033419e-115
ENSG00000170540	23204	ARL6IP1	ADP ribosylation factor like GTPase 6 interacting protein 1	2955.69632987882	-1.253934368455	7.55468065692105e-115
ENSG00000087510	7022	TFAP2C	transcription factor AP-2 gamma	2659.9996648985	-1.25855725081655	1.96848734797869e-113
ENSG00000160307	6285	S100B	S100 calcium binding protein B	3301.0165447892	-1.26631451187164	1.85489553257451e-111
ENSG00000123243	80760	ITIH5	inter-alpha-trypsin inhibitor heavy chain family member 5	2053.637477725	1.51692250118146	3.76226508227976e-111
ENSG00000075624	60	ACTB	actin beta	38723.1367399399	-1.08974018879076	1.43631063910256e-110
ENSG00000115380	2202	EFEMP1	EGF containing fibulin extracellular matrix protein 1	1020.47297916563	-1.7081650464768	2.01840730526153e-107
ENSG00000187678	81848	SPRY4	sprouty RTK signaling antagonist 4	3191.90820430706	-1.26971957583018	1.35046086332889e-105
ENSG00000117984	1509	CTSD	cathepsin D	2449.56027673982	1.41974036391853	1.43023760367124e-105
ENSG00000137868	64220	STRA6	stimulated by retinoic acid 6	342.85777588943	-2.84182367885319	4.27181494310633e-105
ENSG00000188157	375790	AGRN	agrin	2368.67908079748	1.33953440197093	1.10119190897013e-100
ENSG00000248905	342184	FMN1	formin 1	1092.59920837397	1.78741560362426	4.74998620576738e-100
ENSG00000132329	10267	RAMP1	receptor activity modifying protein 1	385.285008262087	-2.63176876352455	1.33966728893791e-98
ENSG00000101638	29906	ST8SIA5	ST8 alpha-N-acetyl-neuraminide alpha-2,8-sialyltransferase 5	2907.28988915694	-1.26116637818853	8.42868587524009e-98
ENSG00000170921	26115	TANC2	tetratricopeptide repeat, ankyrin repeat and coiled-coil containing 2	1794.84365637842	-1.25988555977695	7.61293032640609e-97
ENSG00000178209	5339	PLEC	plectin	15222.2951085499	1.10872463689025	1.31118184767338e-95
ENSG00000121068	6909	TBX2	T-box 2	2467.07695411426	1.2141529257035	6.15670908689307e-94
ENSG00000112096	6648	SOD2	superoxide dismutase 2	929.857629518994	1.79736872140748	1.44900200644375e-93
ENSG00000131747	7153	TOP2A	DNA topoisomerase II alpha	5774.80369764895	-0.959125513524371	1.88410379308895e-93
ENSG00000136235	10457	GPNMB	glycoprotein nmb	8271.36533252686	1.04070511988633	1.32822966389774e-91
ENSG00000112715	7422	VEGFA	vascular endothelial growth factor A	906.060914629291	2.28490691052149	1.60304063641651e-90
ENSG00000001461	57185	NIPAL3	NIPA like domain containing 3	961.312113405587	-1.61119306970775	1.77924368455927e-90
ENSG00000198768	164284	APCDD1L	APC down-regulated 1 like	1952.03710971051	-1.35560347309474	3.76440358745316e-90
ENSG00000159399	3099	HK2	hexokinase 2	1920.90083006121	1.27778666589232	1.41773731647697e-87
ENSG00000140105	7453	WARS	tryptophanyl-tRNA synthetase	3013.0140136123	1.15851954627647	3.84361989601296e-87
ENSG00000155893	92370	PXYLP1	2-phosphoxylose phosphatase 1	705.19317840501	-1.72118275062221	1.57232762272165e-85
ENSG00000108828	10493	VAT1	vesicle amine transport 1	1703.22080995615	1.3817655590456	2.27906126813656e-85
ENSG00000168209	54541	DDIT4	DNA damage inducible transcript 4	1436.65447269539	1.60248960175779	3.3572626209494e-85
ENSG00000172380	55970	GNG12	G protein subunit gamma 12	7663.71139615915	-0.995485624656119	5.8595147698269e-84
ENSG00000164543	9263	STK17A	serine/threonine kinase 17a	1506.93395021228	-1.34970239000042	7.7000005998828e-84
ENSG00000065361	2065	ERBB3	erb-b2 receptor tyrosine kinase 3	6939.36522313011	-0.86798032092551	8.33590961264407e-84
ENSG00000167548	8085	KMT2D	lysine methyltransferase 2D	1653.90921758011	1.40834463786045	1.23432972457014e-83
ENSG00000134107	8553	BHLHE40	basic helix-loop-helix family member e40	2779.18062994	1.25943307493422	3.12896679176402e-83
ENSG00000205336	9289	ADGRG1	adhesion G protein-coupled receptor G1	2766.80569061537	1.1409833563368	5.93269570948521e-83
ENSG00000184254	220	ALDH1A3	aldehyde dehydrogenase 1 family member A3	2824.35033623374	-1.13118009179733	5.98422461931882e-82
ENSG00000144810	1295	COL8A1	collagen type VIII alpha 1 chain	5009.44034605659	-0.98180929253771	2.02216799403558e-80
ENSG00000168621	2668	GDNF	glial cell derived neurotrophic factor	1072.09687998488	1.51626056586145	2.15978410260933e-79
ENSG00000091409	3655	ITGA6	integrin subunit alpha 6	5397.31455458844	-0.931635387109464	4.48000090570695e-79
ENSG00000187498	1282	COL4A1	collagen type IV alpha 1 chain	3563.66492039567	1.02588489651179	1.28568957964907e-78
ENSG00000113739	8614	STC2	stanniocalcin 2	335.039313667437	4.39338426251779	5.96961678222521e-78
ENSG00000128342	3976	LIF	LIF, interleukin 6 family cytokine	1270.04200277432	1.43505170760649	1.0933840618374e-76
ENSG00000141526	9123	SLC16A3	solute carrier family 16 member 3	1238.3984808415	1.51252376898725	1.88215274854907e-76
ENSG00000114268	5210	PFKFB4	6-phosphofructo-2-kinase/fructose-2,6-biphosphatase 4	1266.16966106342	1.5079026305094	2.25017321301777e-76
ENSG00000184640	10801	SEPTIN9	septin 9	10177.7118407701	0.873212771048347	4.84781586272046e-76
ENSG00000196365	9361	LONP1	lon peptidase 1, mitochondrial	1875.25492934405	1.28183401124431	1.5892754062711e-73
ENSG00000120738	1958	EGR1	early growth response 1	5707.15765329518	-2.92711325828144	5.15775094465676e-73
ENSG00000107807	3195	TLX1	T cell leukemia homeobox 1	216.68921643068	-2.79451128040973	2.46769310360261e-72
ENSG00000154175	25890	ABI3BP	ABI family member 3 binding protein	513.028050552273	-1.76746010550442	2.81613358211433e-72
ENSG00000071991	28513	CDH19	cadherin 19	2420.7057939489	1.08104576143308	1.67598915037592e-71
ENSG00000112972	3157	HMGCS1	3-hydroxy-3-methylglutaryl-CoA synthase 1	1029.08173242113	-1.32756163301854	3.7903258645137e-71
ENSG00000116133	1718	DHCR24	24-dehydrocholesterol reductase	4761.73450960382	-1.0701366165262	4.34969481966674e-71
ENSG00000105695	4099	MAG	myelin associated glycoprotein	170.150670823818	-3.37164120828705	9.77448524585762e-71
ENSG00000145555	4651	MYO10	myosin X	3579.87435730707	0.979492189583523	2.10692290305721e-70
ENSG00000101255	57761	TRIB3	tribbles pseudokinase 3	654.957027924593	1.93300224803636	2.14700785288544e-70
ENSG00000130164	3949	LDLR	low density lipoprotein receptor	1567.67850971776	-1.10923109833486	5.51655667421449e-70
ENSG00000125945	80818	ZNF436	zinc finger protein 436	587.882010655052	-1.67818638899543	6.42568180000727e-70
ENSG00000166750	162394	SLFN5	schlafen family member 5	1369.0172044686	1.70828632137216	2.53711907747259e-68
ENSG00000083857	2195	FAT1	FAT atypical cadherin 1	4987.5611112757	0.960179403372887	5.4671982239489e-68
ENSG00000197355	91373	UAP1L1	UDP-N-acetylglucosamine pyrophosphorylase 1 like 1	1466.94502451485	1.28253790171652	7.26803740875222e-68
ENSG00000171848	6241	RRM2	ribonucleotide reductase regulatory subunit M2	4143.44494951844	-1.02789546561198	7.46249208867549e-68
ENSG00000186480	3638	INSIG1	insulin induced gene 1	1709.1112717889	-1.17046662232009	1.49595130192838e-67
ENSG00000185567	113146	AHNAK2	AHNAK nucleoprotein 2	837.171763053866	1.60101488381484	2.2958879053004e-67
ENSG00000130821	6535	SLC6A8	solute carrier family 6 member 8	2932.77937717256	1.0950925222697	3.60245159306553e-67
ENSG00000082781	3693	ITGB5	integrin subunit beta 5	1350.81613259989	1.44354761603111	1.1099424153768e-66
ENSG00000172216	1051	CEBPB	CCAAT enhancer binding protein beta	920.373946136671	1.60993684346039	1.32024786041434e-66
ENSG00000266074	57597	BAHCC1	BAH domain and coiled-coil containing 1	633.893528791702	1.88481257563472	4.05546006498956e-66
ENSG00000118785	6696	SPP1	secreted phosphoprotein 1	1127.68472082323	1.3486879847688	7.22024507042778e-66
ENSG00000121060	7706	TRIM25	tripartite motif containing 25	1605.04506308508	1.36732210888264	1.07633891026098e-65
ENSG00000119403	26147	PHF19	PHD finger protein 19	1467.41318072249	-1.12712393427892	4.74203607134896e-65
ENSG00000154262	23460	ABCA6	ATP binding cassette subfamily A member 6	131.138585347131	-3.57211217706874	9.47233327775835e-65
ENSG00000125868	11034	DSTN	destrin, actin depolymerizing factor	11824.8197669123	-0.821827806292226	1.79641417021043e-64
ENSG00000130513	9518	GDF15	growth differentiation factor 15	834.619087695256	1.85232979743266	3.87755132109076e-63
ENSG00000140961	29948	OSGIN1	oxidative stress induced growth inhibitor 1	697.767323233029	1.71064758792815	8.07597449089252e-63
ENSG00000069275	64710	NUCKS1	nuclear casein kinase and cyclin dependent kinase substrate 1	8205.38779531963	-0.882094300923757	2.25198681780444e-62
ENSG00000117152	5999	RGS4	regulator of G protein signaling 4	359.977609601967	-1.96250487579257	4.93916761105589e-62
ENSG00000158859	9507	ADAMTS4	ADAM metallopeptidase with thrombospondin type 1 motif 4	105.47795822446	-4.91239351578135	6.36936699021925e-62
ENSG00000090530	55214	P3H2	prolyl 3-hydroxylase 2	994.900349756087	1.34969888937059	1.18427656459186e-61
ENSG00000044574	3309	HSPA5	heat shock protein family A (Hsp70) member 5	13341.7215913197	-0.81604755416389	1.92626814827868e-61
ENSG00000136999	4856	NOV	nephroblastoma overexpressed	337.155491552259	2.55293660160286	5.3239119384007e-61
ENSG00000164713	25798	BRI3	brain protein I3	976.473657802712	1.41433244462102	5.62441821298769e-61
ENSG00000060718	1301	COL11A1	collagen type XI alpha 1 chain	12423.6747530304	0.726905185287331	1.35796523119335e-59
ENSG00000152377	6695	SPOCK1	SPARC (osteonectin), cwcv and kazal like domains proteoglycan 1	2170.64842219661	-0.952293940495813	5.44832907931633e-59
ENSG00000119326	8727	CTNNAL1	catenin alpha like 1	964.888606457919	-1.23059469018863	9.34110040077307e-59
ENSG00000198840	4537	ND3	NADH dehydrogenase, subunit 3 (complex I)	2518.32955844359	-1.08060050513517	2.20274175698169e-58
ENSG00000171617	8507	ENC1	ectodermal-neural cortex 1	1322.82881122415	-1.07201528490927	8.39976104367073e-58
ENSG00000154556	8470	SORBS2	sorbin and SH3 domain containing 2	1004.1015399254	1.32057266317464	8.57851526920881e-58
ENSG00000178719	2907	GRINA	glutamate ionotropic receptor NMDA type subunit associated protein 1	2038.26616899392	1.05933069571191	8.57851526920881e-58
ENSG00000185022	23764	MAFF	MAF bZIP transcription factor F	817.186004441357	1.47791431049426	8.57851526920881e-58
ENSG00000117394	6513	SLC2A1	solute carrier family 2 member 1	2163.83938917407	1.04820497748611	1.10972999756272e-57
ENSG00000166394	51700	CYB5R2	cytochrome b5 reductase 2	943.146077004503	-1.2773814303924	1.60354155177402e-56
ENSG00000128272	468	ATF4	activating transcription factor 4	3321.10312339128	0.912594751452811	3.80318689399059e-56
ENSG00000117632	3925	STMN1	stathmin 1	5232.33940920158	-0.840346134668041	6.14737220922526e-56
ENSG00000115648	79083	MLPH	melanophilin	446.067472583091	1.92136164483927	6.61795123409371e-56
ENSG00000088325	22974	TPX2	TPX2, microtubule nucleation factor	4596.44929577849	-0.814404617349283	7.27791690349514e-56
ENSG00000189058	347	APOD	apolipoprotein D	647.071525534111	-1.40480410627953	3.42691187641352e-55
ENSG00000137804	51203	NUSAP1	nucleolar and spindle associated protein 1	2649.63936901994	-0.92214734818122	3.878888358274e-55
ENSG00000052802	6307	MSMO1	methylsterol monooxygenase 1	1083.71391889762	-1.2239476333982	9.69278801235861e-55
ENSG00000164949	2669	GEM	GTP binding protein overexpressed in skeletal muscle	402.898676066822	2.04776415638976	3.07730972732503e-54
ENSG00000184232	220323	OAF	out at first homolog	1427.79961637881	1.24786307160392	3.82740817506774e-54
ENSG00000170558	1000	CDH2	cadherin 2	2199.53997409728	-0.900191612224452	8.20726913290692e-54
ENSG00000104783	3783	KCNN4	potassium calcium-activated channel subfamily N member 4	1668.53677139858	-1.10225768882169	1.53479493549478e-53
ENSG00000134824	9415	FADS2	fatty acid desaturase 2	1801.27374145123	-1.11146124701511	2.06433864555804e-53
ENSG00000075426	2355	FOSL2	FOS like 2, AP-1 transcription factor subunit	436.135807616645	1.97139962462178	2.20082306529476e-53
ENSG00000173852	23333	DPY19L1	dpy-19 like C-mannosyltransferase 1	2778.75851172406	-0.92666936639685	2.71136103430413e-53
ENSG00000170345	2353	FOS	Fos proto-oncogene, AP-1 transcription factor subunit	1792.25353006643	-3.10973798353055	2.74868548804406e-53
ENSG00000119508	8013	NR4A3	nuclear receptor subfamily 4 group A member 3	232.761221830879	4.76694670647492	4.90796734932168e-53
ENSG00000136231	10643	IGF2BP3	insulin like growth factor 2 mRNA binding protein 3	1116.72643059535	-1.12220569390611	6.53289272307022e-53
ENSG00000112984	10112	KIF20A	kinesin family member 20A	2176.12537922242	-0.965512087377168	7.92873869776936e-53
ENSG00000127481	23352	UBR4	ubiquitin protein ligase E3 component n-recognin 4	2863.86846338513	1.11952980176314	1.12973670680512e-52
ENSG00000145040	90226	UCN2	urocortin 2	558.691247784381	1.63589258677964	1.43409093821933e-52
ENSG00000177606	3725	JUN	Jun proto-oncogene, AP-1 transcription factor subunit	2141.42202205183	-1.06600964888127	2.41318239191619e-52
ENSG00000188641	1806	DPYD	dihydropyrimidine dehydrogenase	1004.83088244073	-1.14191453949255	4.59527637952229e-52
ENSG00000128656	1123	CHN1	chimerin 1	2002.08770381499	-0.969261131893512	6.06251441368435e-52
ENSG00000173402	1605	DAG1	dystroglycan 1	6833.70427768651	-0.787220340118027	7.93623673259843e-52
ENSG00000127418	53834	FGFRL1	fibroblast growth factor receptor like 1	1673.22982635952	-1.05347925286886	8.05948929881783e-52
ENSG00000116962	4811	NID1	nidogen 1	6165.56914510138	-0.707166212143366	8.52057744816881e-52
ENSG00000182580	2049	EPHB3	EPH receptor B3	660.696344168913	-1.40397926123951	8.6728505572408e-52
ENSG00000127124	59269	HIVEP3	human immunodeficiency virus type I enhancer binding protein 3	1011.66709517775	-1.11815417905979	1.26495600902785e-51
ENSG00000139737	122060	SLAIN1	SLAIN motif family member 1	682.762457321709	-1.33970664553148	3.52049948203063e-51
ENSG00000169908	4071	TM4SF1	transmembrane 4 L six family member 1	957.743967168502	1.3776282499719	4.99234497627373e-51
ENSG00000178445	2731	GLDC	glycine decarboxylase	273.243394967658	-1.994473313621	5.01067149388447e-51
ENSG00000120875	1846	DUSP4	dual specificity phosphatase 4	5682.88124249193	0.764298574094412	6.10652145649356e-51
ENSG00000110756	11234	HPS5	HPS5, biogenesis of lysosomal organelles complex 2 subunit 2	1331.73113039695	-1.00910649856502	8.16999160930145e-51
ENSG00000162706	57863	CADM3	cell adhesion molecule 3	1052.82638587996	-1.31746229615753	8.16999160930145e-51
ENSG00000086300	29887	SNX10	sorting nexin 10	1167.47319851523	-1.12409588559627	1.64365822152993e-50
ENSG00000177807	3766	KCNJ10	potassium voltage-gated channel subfamily J member 10	216.029793532357	-2.19176003546322	2.26614200109491e-50
ENSG00000178685	84875	PARP10	poly(ADP-ribose) polymerase family member 10	651.222432963659	1.52974785841894	2.32223642328378e-50
ENSG00000011426	54443	ANLN	anillin actin binding protein	5005.28289184992	-0.777492668563868	5.4070890213027e-50
ENSG00000125249	5911	RAP2A	RAP2A, member of RAS oncogene family	668.295628463131	-1.28994177904971	9.21851393136205e-49
ENSG00000225614	84627	ZNF469	zinc finger protein 469	316.4157932591	2.33557794090182	2.55166793739795e-48
ENSG00000123384	4035	LRP1	LDL receptor related protein 1	1970.15411119949	0.990136151425126	2.73193852583082e-48
ENSG00000123983	2181	ACSL3	acyl-CoA synthetase long chain family member 3	5726.54089959907	-0.777205605441667	2.77323736682903e-48
ENSG00000179603	2918	GRM8	glutamate metabotropic receptor 8	225.824544545682	-2.08481574311857	4.23267364144381e-48
ENSG00000161800	29127	RACGAP1	Rac GTPase activating protein 1	1970.27698961877	-0.875589570027815	6.14507960773685e-48
ENSG00000005513	30812	SOX8	SRY-box 8	158.168128319367	-2.65489508558291	9.91268336737622e-48
ENSG00000152256	5163	PDK1	pyruvate dehydrogenase kinase 1	850.44502473694	1.28007467188321	1.1379897576331e-47
ENSG00000196208	9687	GREB1	growth regulating estrogen receptor binding 1	342.198474695565	2.09618238568527	1.27488375413504e-47
ENSG00000155265	401647	GOLGA7B	golgin A7 family member B	238.649576524486	2.70485733317974	1.2801078755913e-47
ENSG00000184009	71	ACTG1	actin gamma 1	28686.6738543628	-0.717439727619664	2.04553331081141e-47
ENSG00000135046	301	ANXA1	annexin A1	2666.98520512136	-0.899453922315724	2.41566515084392e-47
ENSG00000168078	55872	PBK	PDZ binding kinase	1422.2801812401	-1.01445649622751	2.47972022270609e-47
ENSG00000242808	347689	SOX2-OT	SOX2 Overlapping Transcript	107.691184771606	-3.30599916817824	2.54635195429281e-47
ENSG00000067064	3422	IDI1	isopentenyl-diphosphate delta isomerase 1	847.155377464046	-1.20316682042623	3.29528104251546e-47
ENSG00000120802	7112	TMPO	thymopoietin	2970.42664659264	-0.807208513456174	3.86474483561433e-47
ENSG00000175445	4023	LPL	lipoprotein lipase	355.237518804181	-1.70919363425937	5.16415925457704e-47
ENSG00000123989	79586	CHPF	chondroitin polymerizing factor	3759.87524645592	0.979148262346724	5.20773187715952e-47
ENSG00000038427	1462	VCAN	versican	7926.2589282834	-0.677252748915721	7.94542995344241e-47
ENSG00000102032	5973	RENBP	renin binding protein	252.170230385881	2.58412711416915	8.94353345737623e-47
ENSG00000102144	5230	PGK1	phosphoglycerate kinase 1	8198.57819215935	0.825168854187789	2.13641287504205e-46
ENSG00000136824	10592	SMC2	structural maintenance of chromosomes 2	2250.33904468403	-0.847359284691137	2.76932378285644e-46
ENSG00000164692	1278	COL1A2	collagen type I alpha 2 chain	205.823836530123	3.16819592589778	2.80049401690974e-46
ENSG00000197102	1778	DYNC1H1	dynein cytoplasmic 1 heavy chain 1	5244.91937209531	0.797078295553929	3.91858181516825e-46
ENSG00000094916	23468	CBX5	chromobox 5	2821.07320162423	-0.791672757728873	4.49166102552186e-46
ENSG00000132510	23135	KDM6B	lysine demethylase 6B	350.708851114654	2.12966356040633	4.53621881641908e-46
ENSG00000185950	8660	IRS2	insulin receptor substrate 2	825.017406461493	1.23444393165787	4.78678954851706e-46
ENSG00000103257	8140	SLC7A5	solute carrier family 7 member 5	14794.206667785	0.755376435223021	2.58164491387654e-45
ENSG00000131981	3958	LGALS3	galectin 3	1019.36078437185	1.21333090944954	6.04237784718191e-45
ENSG00000091986	151887	CCDC80	coiled-coil domain containing 80	377.661093710717	-1.60858091966301	8.99680028121064e-45
ENSG00000104763	427	ASAH1	N-acylsphingosine amidohydrolase 1	1267.5433267894	1.11688666445847	9.9135541331114e-45
ENSG00000104549	6713	SQLE	squalene epoxidase	1281.11661510504	-1.03193942750237	1.06528927951707e-44
ENSG00000085063	966	CD59	CD59 molecule (CD59 blood group)	8522.69118744014	-0.779237433889515	1.22141906649946e-44
ENSG00000143322	27	ABL2	ABL proto-oncogene 2, non-receptor tyrosine kinase	1445.72999807308	0.996130037646011	1.46438360774844e-44
ENSG00000134318	9475	ROCK2	Rho associated coiled-coil containing protein kinase 2	2997.74411910156	-0.759683891893547	2.96839924104356e-44
ENSG00000136732	2995	GYPC	glycophorin C (Gerbich blood group)	816.489600639737	1.25269777445943	3.54023051476677e-44
ENSG00000164985	11168	PSIP1	PC4 and SFRS1 interacting protein 1	1467.16202369038	-0.921675222204631	6.5409331906981e-44
ENSG00000131389	6533	SLC6A6	solute carrier family 6 member 6	2972.95356358928	0.781849610958589	6.70482786639139e-44
ENSG00000050165	27122	DKK3	dickkopf WNT signaling pathway inhibitor 3	6781.52719992667	-0.82309187094868	1.76065609862918e-43
ENSG00000026025	7431	VIM	vimentin	16331.1053429586	-0.606229596624299	1.85605656898941e-43
ENSG00000136854	6812	STXBP1	syntaxin binding protein 1	1437.15854640582	0.997309966075765	2.54398995458488e-43
ENSG00000143515	57198	ATP8B2	ATPase phospholipid transporting 8B2	2305.03190641232	0.83756783750802	3.43208025094989e-43
ENSG00000185507	3665	IRF7	interferon regulatory factor 7	232.684349718249	2.8023994448557	3.77443296557591e-43
ENSG00000125827	56255	TMX4	thioredoxin related transmembrane protein 4	2483.17894626688	-0.839462624756142	3.87151896956082e-43
ENSG00000187098	4286	MITF	melanogenesis associated transcription factor	1368.38632790875	1.05460621200281	4.67362485886281e-43
ENSG00000139318	1848	DUSP6	dual specificity phosphatase 6	1272.4665790894	-0.990151035344858	5.1730640645481e-43
ENSG00000112137	221692	PHACTR1	phosphatase and actin regulator 1	305.813658453308	2.04693531817664	1.07746348311751e-42
ENSG00000105220	2821	GPI	glucose-6-phosphate isomerase	3398.93311968714	0.753418359079117	4.33274292945214e-42
ENSG00000179869	154664	ABCA13	ATP binding cassette subfamily A member 13	274.589590710768	-1.83883941172541	4.7094719780502e-42
ENSG00000176845	284207	METRNL	meteorin like, glial cell differentiation regulator	310.062616363056	2.03880070428299	5.73715085253472e-42
ENSG00000165029	19	ABCA1	ATP binding cassette subfamily A member 1	251.098281858157	-1.89953929966521	9.24484188132334e-42
ENSG00000169764	7360	UGP2	UDP-glucose pyrophosphorylase 2	1688.75819993311	-0.884506122616657	1.69128717726703e-41
ENSG00000117143	6675	UAP1	UDP-N-acetylglucosamine pyrophosphorylase 1	1007.70763738736	-1.05097263681004	2.53475742755618e-41
ENSG00000242802	9907	AP5Z1	adaptor related protein complex 5 zeta 1 subunit	726.372998038822	1.28523630851989	3.84137698932066e-41
ENSG00000175063	11065	UBE2C	ubiquitin conjugating enzyme E2 C	1522.6285263554	-0.963645245633971	5.11999572992488e-41
ENSG00000100505	114088	TRIM9	tripartite motif containing 9	1000.08879635949	-1.02838795128401	5.27410517109232e-41
ENSG00000113140	6678	SPARC	secreted protein acidic and cysteine rich	31210.913506143	-0.650247498621326	6.33112150889454e-41
ENSG00000260423	101930452	LINC02367	long intergenic non-protein coding RNA 2367	502.751110553981	-1.32648103359744	6.85999135416104e-41
ENSG00000111371	81539	SLC38A1	solute carrier family 38 member 1	307.038323841547	1.93531686963643	4.50837681461061e-40
ENSG00000138678	84803	GPAT3	glycerol-3-phosphate acyltransferase 3	822.895653424051	-1.11495315508029	5.49329684681661e-40
ENSG00000170312	983	CDK1	cyclin dependent kinase 1	1783.15153981132	-0.857431566719883	5.88518294647745e-40
ENSG00000138182	9585	KIF20B	kinesin family member 20B	1374.89856199779	-0.961992503062397	7.49860675118926e-40
ENSG00000134363	10468	FST	follistatin	2177.54655179972	0.810345990617406	7.72666410679565e-40
ENSG00000115415	6772	STAT1	signal transducer and activator of transcription 1	3251.29258972867	1.08253764682986	9.04084777221992e-40
ENSG00000147408	55790	CSGALNACT1	chondroitin sulfate N-acetylgalactosaminyltransferase 1	703.382388210317	-1.1502415364021	9.97440620064328e-40
ENSG00000079482	4983	OPHN1	oligophrenin 1	557.476137363398	-1.26928753917569	1.12697750476997e-39
ENSG00000175899	2	A2M	alpha-2-macroglobulin	1711.2833682595	-0.991971601463457	1.21002405873803e-39
ENSG00000164904	501	ALDH7A1	aldehyde dehydrogenase 7 family member A1	1566.44642264867	-0.842464980882102	1.44951753926222e-39
ENSG00000090339	3383	ICAM1	intercellular adhesion molecule 1	490.450635374979	1.58507262063304	2.31896779793754e-39
ENSG00000106105	2617	GARS	glycyl-tRNA synthetase	3638.39390884932	0.760365975947917	2.42201011961804e-39
ENSG00000126787	9787	DLGAP5	DLG associated protein 5	1046.41266686077	-0.949833275773847	3.29693196882282e-39
ENSG00000137331	8870	IER3	immediate early response 3	1088.93994802037	1.09344792575711	5.08338857426944e-39
ENSG00000105968	94239	H2AFV	H2A histone family member V	3170.27421779001	-0.74392775738577	5.10826761175976e-39
ENSG00000125968	3397	ID1	inhibitor of DNA binding 1, HLH protein	1038.32978087977	-0.962980038092738	7.72063374305422e-39
ENSG00000147588	5375	PMP2	peripheral myelin protein 2	159.562086638416	4.31846260192849	8.5585332477366e-39
ENSG00000079739	5236	PGM1	phosphoglucomutase 1	2625.80551500218	0.812764251513344	8.6196405397474e-39
ENSG00000148841	85450	ITPRIP	inositol 1,4,5-trisphosphate receptor interacting protein	662.619816073946	1.25191050645368	8.83993717732164e-39
ENSG00000197959	26052	DNM3	dynamin 3	347.101649141199	-1.56817798012471	1.25947056535002e-38
ENSG00000124201	57169	ZNFX1	zinc finger NFX1-type containing 1	1476.06242243381	0.981193849319499	1.72578588955998e-38
ENSG00000156103	4325	MMP16	matrix metallopeptidase 16	4274.14471624762	-0.64898756014503	1.97406421747826e-38
ENSG00000204291	1306	COL15A1	collagen type XV alpha 1 chain	1069.09336772902	1.09041079091892	2.05187623241745e-38
ENSG00000072571	3161	HMMR	hyaluronan mediated motility receptor	579.194863402681	-1.19968674148811	3.71725607841785e-38
ENSG00000109452	8821	INPP4B	inositol polyphosphate-4-phosphatase type II B	912.033856975553	1.09303181164074	5.99012222028013e-38
ENSG00000106236	4885	NPTX2	neuronal pentraxin 2	92.2272954829376	-3.09376492656888	7.06015289404559e-38
ENSG00000099917	51586	MED15	mediator complex subunit 15	2102.32225506795	0.928161608423991	7.48088401559673e-38
ENSG00000075223	10512	SEMA3C	semaphorin 3C	3654.4108921521	-0.720835050932765	1.31600835822972e-37
ENSG00000159167	6781	STC1	stanniocalcin 1	244.157103027845	2.25972207818566	1.34462612523004e-37
ENSG00000198826	9824	ARHGAP11A	Rho GTPase activating protein 11A	1637.76146396241	-0.835845541719132	1.67578700692408e-37
ENSG00000183486	4600	MX2	MX dynamin like GTPase 2	173.262345326092	3.44833347114191	2.5544043947431e-37
ENSG00000162413	9903	KLHL21	kelch like family member 21	2062.19110660586	0.826027392912317	2.77527354419997e-37
ENSG00000234741	60674	GAS5	growth arrest specific 5 (non-protein coding)	1268.36450266956	1.27031298229423	3.82049659163692e-37
ENSG00000025039	58528	RRAGD	Ras related GTP binding D	564.336939219082	1.35715896527298	4.77373760002284e-37
ENSG00000171241	79801	SHCBP1	SHC binding and spindle associated 1	1617.61916270306	-0.814061395415318	5.07970589711326e-37
ENSG00000138778	1062	CENPE	centromere protein E	1389.51521993602	-0.860279376819132	6.16499669707415e-37
ENSG00000198901	9055	PRC1	protein regulator of cytokinesis 1	2721.67513509521	-0.722708903399198	6.67104619388541e-37
ENSG00000168003	6520	SLC3A2	solute carrier family 3 member 2	6594.32444646483	0.69281725494871	7.7939356889048e-37
ENSG00000087074	23645	PPP1R15A	protein phosphatase 1 regulatory subunit 15A	1707.40062250015	0.853339573333288	7.82279402231088e-37
ENSG00000115525	8869	ST3GAL5	ST3 beta-galactoside alpha-2,3-sialyltransferase 5	653.183468862932	-1.15642254313624	1.16858718106006e-36
ENSG00000106771	23731	TMEM245	transmembrane protein 245	1736.26854825354	-0.789955873889424	1.72522794655258e-36
ENSG00000172175	10892	MALT1	MALT1 paracaspase	1103.76408166716	-0.93009579822011	2.09088922122597e-36
ENSG00000148926	133	ADM	adrenomedullin	670.322892907563	1.28921397980781	3.7521411281361e-36
ENSG00000105974	857	CAV1	caveolin 1	3326.57323131081	-0.709183979354843	3.81851658747619e-36
ENSG00000131069	55902	ACSS2	acyl-CoA synthetase short chain family member 2	940.474920441591	-0.959648556260964	5.32030405224286e-36
ENSG00000164889	6522	SLC4A2	solute carrier family 4 member 2	2888.79968861965	0.714131167030062	6.16203617290499e-36
ENSG00000115652	80146	UXS1	UDP-glucuronate decarboxylase 1	1633.02027944322	-0.909321647213633	6.35815120033706e-36
ENSG00000060491	11054	OGFR	opioid growth factor receptor	1473.80103666326	0.91146156901253	9.51369242517454e-36
ENSG00000113163	10087	COL4A3BP	collagen type IV alpha 3 binding protein	4290.37242454093	-0.638280537373512	1.24924749815779e-35
ENSG00000171492	55144	LRRC8D	leucine rich repeat containing 8 VRAC subunit D	804.630564161155	-1.0310091082416	2.27669136029047e-35
ENSG00000102575	54	ACP5	acid phosphatase 5, tartrate resistant	531.454311896735	1.46864762714048	2.65378016310394e-35
ENSG00000198408	10724	MGEA5	meningioma expressed antigen 5 (hyaluronidase)	1276.362876564	1.00360234070283	2.86115641452166e-35
ENSG00000177301	3737	KCNA2	potassium voltage-gated channel subfamily A member 2	177.854476072337	-2.0954491297822	3.36857720630169e-35
ENSG00000126709	2537	IFI6	interferon alpha inducible protein 6	885.038756028611	1.48574033464638	4.24140333021141e-35
ENSG00000164880	26173	INTS1	integrator complex subunit 1	2698.49044346592	0.705340987015061	4.95358288954496e-35
ENSG00000008710	5310	PKD1	polycystin 1, transient receptor potential channel interacting	929.037012323785	1.15609098566133	5.16809922539561e-35
ENSG00000105281	6510	SLC1A5	solute carrier family 1 member 5	1988.02646901868	0.864416993117887	5.62493775861222e-35
ENSG00000242265	23089	PEG10	paternally expressed 10	3166.43246522773	-0.662979143906022	5.87465024050128e-35
ENSG00000126878	83543	AIF1L	allograft inflammatory factor 1 like	868.910491441809	-0.986444974311094	7.64408749996491e-35
ENSG00000116016	2034	EPAS1	endothelial PAS domain protein 1	410.947098214144	1.51819166972066	8.0832006909561e-35
ENSG00000153234	4929	NR4A2	nuclear receptor subfamily 4 group A member 2	1118.96947846729	1.02421086544886	9.35553973613335e-35
ENSG00000149948	8091	HMGA2	high mobility group AT-hook 2	250.123977522437	2.0437581588387	9.62975493516966e-35
ENSG00000105767	199731	CADM4	cell adhesion molecule 4	2750.03314003333	-0.781951204954086	1.05436647501634e-34
ENSG00000099814	283638	CEP170B	centrosomal protein 170B	785.061449854556	1.18594424263268	1.47541363578122e-34
ENSG00000123146	976	ADGRE5	adhesion G protein-coupled receptor E5	858.448483428942	1.13214338633466	1.48622370978812e-34
ENSG00000067057	5214	PFKP	phosphofructokinase, platelet	1962.13378087275	0.807393985484912	1.52332080090311e-34
ENSG00000150093	3688	ITGB1	integrin subunit beta 1	9155.84131995038	-0.642380974837193	1.67024904431786e-34
ENSG00000134954	2113	ETS1	ETS proto-oncogene 1, transcription factor	1463.56311601972	0.847698157045351	2.28158835305074e-34
ENSG00000250479	400916	CHCHD10	coiled-coil-helix-coiled-coil-helix domain containing 10	157.453171518723	2.92253816483131	2.56668210406764e-34
ENSG00000205903	100131017	ZNF316	zinc finger protein 316	999.855739336245	1.14293726709553	2.65245108535253e-34
ENSG00000135919	5270	SERPINE2	serpin family E member 2	38669.9839748807	0.580125772592841	2.77622032859571e-34
ENSG00000008083	3720	JARID2	jumonji and AT-rich interaction domain containing 2	723.949856750939	1.142631695992	2.8714232591023e-34
ENSG00000196154	6275	S100A4	S100 calcium binding protein A4	640.747060882806	1.33844547479835	5.43503703022824e-34
ENSG00000162433	205	AK4	adenylate kinase 4	463.457419186786	1.41460087020825	6.01593597861421e-34
ENSG00000160888	9592	IER2	immediate early response 2	428.245251960906	-1.30036572215006	6.38751720000138e-34
ENSG00000134684	8565	YARS	tyrosyl-tRNA synthetase	1731.32501338608	0.79155383671559	6.80836219456202e-34
ENSG00000087086	2512	FTL	ferritin light chain	12105.5258136992	0.92280605496656	7.8007043783382e-34
ENSG00000162772	467	ATF3	activating transcription factor 3	282.363006749641	1.81347551697557	8.4167866583309e-34
ENSG00000117519	1266	CNN3	calponin 3	1899.00989234595	-0.842587205604516	9.05428486049496e-34
ENSG00000198355	415116	PIM3	Pim-3 proto-oncogene, serine/threonine kinase	1689.82316309627	1.09712875923586	1.24963241572134e-33
ENSG00000115825	23683	PRKD3	protein kinase D3	2156.12682558701	-0.72496521600456	1.60416435396597e-33
ENSG00000075618	6624	FSCN1	fascin actin-bundling protein 1	4643.69296300025	-0.662816294708574	1.63513056255042e-33
ENSG00000107816	84445	LZTS2	leucine zipper tumor suppressor 2	1890.15321748569	0.768745765023625	1.76700646545775e-33
ENSG00000166250	79827	CLMP	CXADR like membrane protein	838.988914576	-0.967007964617759	3.18801901597292e-33
ENSG00000105373	29997	NOP53	NOP53 ribosome biogenesis factor	1053.17114557612	0.984341742269326	3.53856295085711e-33
ENSG00000077150	4791	NFKB2	nuclear factor kappa B subunit 2	471.883032131648	1.35084933507183	3.88038434077289e-33
ENSG00000162341	219931	TPCN2	two pore segment channel 2	858.91765885755	1.12217980299722	5.32757530704413e-33
ENSG00000141959	5211	PFKL	phosphofructokinase, liver type	1859.43702883439	0.804238991605316	5.41977323036381e-33
ENSG00000196230	203068	TUBB	tubulin beta class I	14813.1335297628	-0.5954296272474	5.70920695939129e-33
ENSG00000164104	3148	HMGB2	high mobility group box 2	2563.9523777173	-0.699569731253414	6.47281972892681e-33
ENSG00000181192	55526	DHTKD1	dehydrogenase E1 and transketolase domain containing 1	625.809791209965	-1.06354858815449	7.96257884646282e-33
ENSG00000183098	10082	GPC6	glypican 6	816.181914910399	-1.0161967700186	9.62228571181284e-33
ENSG00000166833	89797	NAV2	neuron navigator 2	708.44510217918	1.12626225021932	1.12311650519723e-32
ENSG00000130766	83667	SESN2	sestrin 2	281.573999550236	1.83760999340104	2.04573076966631e-32
ENSG00000138160	3832	KIF11	kinesin family member 11	1851.09215611501	-0.80523423478293	2.1610363146278e-32
ENSG00000163808	56992	KIF15	kinesin family member 15	1055.24439753884	-0.867996705161874	2.4489898406042e-32
ENSG00000065000	8943	AP3D1	adaptor related protein complex 3 delta 1 subunit	2072.51851892308	0.723313602284027	2.76948987688397e-32
ENSG00000024422	30846	EHD2	EH domain containing 2	1523.14954313781	0.815276954301186	2.87297437534758e-32
ENSG00000109805	64151	NCAPG	non-SMC condensin I complex subunit G	1271.3437508652	-0.822758670764709	3.4013059555746e-32
ENSG00000183853	55243	KIRREL1	kirre like nephrin family adhesion molecule 1	6411.41603353885	0.583164915924603	3.62301294431387e-32
ENSG00000171208	81831	NETO2	neuropilin and tolloid like 2	772.794810739235	-1.06058029762442	3.91218036947412e-32
ENSG00000134057	891	CCNB1	cyclin B1	2886.27328819054	-0.713151070389206	4.6119288888548e-32
ENSG00000163659	25976	TIPARP	TCDD inducible poly(ADP-ribose) polymerase	1850.84585535158	-0.759256942677169	4.8943127505231e-32
ENSG00000187608	9636	ISG15	ISG15 ubiquitin-like modifier	222.046814191285	2.4597668179806	5.70965299914015e-32
ENSG00000064961	10362	HMG20B	high mobility group 20B	5014.8147192392	0.59054265903944	7.14067982120242e-32
ENSG00000104332	6422	SFRP1	secreted frizzled related protein 1	729.925966371886	-1.04590682009459	8.55064316244661e-32
ENSG00000106070	2887	GRB10	growth factor receptor bound protein 10	3074.23564736743	0.658088850571525	8.71699704069537e-32
ENSG00000132481	91107	TRIM47	tripartite motif containing 47	827.291470586546	1.03117329918525	1.11635690024551e-31
ENSG00000176890	7298	TYMS	thymidylate synthetase	1602.59856317144	-0.931668467138253	1.22512841082604e-31
ENSG00000123505	262	AMD1	adenosylmethionine decarboxylase 1	1853.47478347865	-0.796416405745287	1.24479549021902e-31
ENSG00000124207	1434	CSE1L	chromosome segregation 1 like	4034.97189313719	-0.654862243887214	1.27494607712708e-31
ENSG00000138193	51196	PLCE1	phospholipase C epsilon 1	364.897405435033	-1.32201594188453	2.00653001843219e-31
ENSG00000173327	4296	MAP3K11	mitogen-activated protein kinase kinase kinase 11	2348.42448018516	0.714970731800327	2.07353198411746e-31
ENSG00000116604	4209	MEF2D	myocyte enhancer factor 2D	819.857383170232	1.01173228404673	2.20691452857803e-31
ENSG00000115461	3488	IGFBP5	insulin like growth factor binding protein 5	1517.01789890873	0.904089785304843	2.58351597234264e-31
ENSG00000080986	10403	NDC80	NDC80, kinetochore complex component	568.091665141078	-1.07799454973097	2.68357670519072e-31
ENSG00000136111	9882	TBC1D4	TBC1 domain family member 4	421.780378151451	-1.26229914706891	2.81522022241147e-31
ENSG00000182481	3838	KPNA2	karyopherin subunit alpha 2	4531.43030278169	-0.661361633218054	3.02697625081518e-31
ENSG00000165959	79789	CLMN	calmin	542.137449648499	-1.12357252912208	3.95014615302603e-31
ENSG00000132361	23277	CLUH	clustered mitochondria homolog	910.968906741498	0.955068764148855	4.26231929942908e-31
ENSG00000167005	11051	NUDT21	nudix hydrolase 21	2386.53184706231	-0.746063888579509	4.65549879152044e-31
ENSG00000104812	2997	GYS1	glycogen synthase 1	657.67807034185	1.18116379976467	5.66634351531884e-31
ENSG00000161013	11282	MGAT4B	mannosyl (alpha-1,3-)-glycoprotein beta-1,4-N-acetylglucosaminyltransferase, isozyme B	1875.10627650089	0.740919835784371	5.81429556629517e-31
ENSG00000163235	7039	TGFA	transforming growth factor alpha	3286.23257428569	-0.756332535604617	6.46816205189978e-31
ENSG00000198952	23381	SMG5	SMG5, nonsense mediated mRNA decay factor	2290.14595566172	0.701686376864688	7.01966423121568e-31
ENSG00000110080	6484	ST3GAL4	ST3 beta-galactoside alpha-2,3-sialyltransferase 4	2985.50002706874	0.824807437719887	9.07862657896165e-31
ENSG00000185745	3434	IFIT1	interferon induced protein with tetratricopeptide repeats 1	360.604025011891	1.97706587017453	1.04480848464292e-30
ENSG00000044115	1495	CTNNA1	catenin alpha 1	14563.776798761	0.497249445236902	1.19006647860249e-30
ENSG00000172037	3913	LAMB2	laminin subunit beta 2	2784.55635628295	0.714450349471784	1.35853149821985e-30
ENSG00000134853	5156	PDGFRA	platelet derived growth factor receptor alpha	204.966128953452	-1.78117510006774	1.38564378004644e-30
ENSG00000228232	2616	GAPDHP1	Glyceraldehyde-3-Phosphate Dehydrogenase Pseudogene 1	152.878575080417	2.63518633364258	1.38958688028924e-30
ENSG00000135931	80210	ARMC9	armadillo repeat containing 9	973.433255400854	0.924465271008173	1.49955666231682e-30
ENSG00000135924	3300	DNAJB2	DnaJ heat shock protein family (Hsp40) member B2	854.578687113335	0.967015661018023	2.11087991781609e-30
ENSG00000167996	2495	FTH1	ferritin heavy chain 1	2431.13716543003	0.882422136391136	2.43657601116035e-30
ENSG00000124006	23363	OBSL1	obscurin like 1	2326.77234471304	0.729948462892452	2.56932099986455e-30
ENSG00000102265	7076	TIMP1	TIMP metallopeptidase inhibitor 1	4747.9774269722	-0.653492308987519	3.11533778959508e-30
ENSG00000146830	64599	GIGYF1	GRB10 interacting GYF protein 1	1041.26750383807	1.29926963474152	3.19688115961017e-30
ENSG00000101447	81610	FAM83D	family with sequence similarity 83 member D	1389.90845293081	-0.822524481657744	3.83836212839916e-30
ENSG00000140416	7168	TPM1	tropomyosin 1	3751.97618421408	-0.590995414645885	3.8435823946035e-30
ENSG00000134871	1284	COL4A2	collagen type IV alpha 2 chain	8098.89807671294	0.534208006825943	3.86263055490781e-30
ENSG00000180776	253832	ZDHHC20	zinc finger DHHC-type containing 20	1460.93551248136	-0.82100424042169	4.16189341706204e-30
ENSG00000116741	5997	RGS2	regulator of G protein signaling 2	171.618513530393	2.51185613636159	4.30568523914289e-30
ENSG00000186469	54331	GNG2	G protein subunit gamma 2	1562.83450403395	-0.840375376969187	4.60636456300718e-30
ENSG00000113368	4001	LMNB1	lamin B1	2207.50823032956	-0.696968835153601	4.65756465333754e-30
ENSG00000147416	526	ATP6V1B2	ATPase H+ transporting V1 subunit B2	2243.59380682895	0.692150864246248	5.06050867912481e-30
ENSG00000160789	4000	LMNA	lamin A/C	18250.7368089056	0.582701001937509	6.81746555278571e-30
ENSG00000156802	29028	ATAD2	ATPase family, AAA domain containing 2	2632.62267624694	-0.69972808667989	6.93019504574469e-30
ENSG00000103855	80381	CD276	CD276 molecule	2926.56432178339	0.825276990144422	9.45161144945345e-30
ENSG00000078018	4133	MAP2	microtubule associated protein 2	1187.54937985166	-0.815989153806069	1.02250818717482e-29
ENSG00000149115	85456	TNKS1BP1	tankyrase 1 binding protein 1	1228.64945005244	0.821218033955338	1.13936879727041e-29
ENSG00000111331	4940	OAS3	2'-5'-oligoadenylate synthetase 3	1632.55179615382	1.14337217872957	1.66267933765783e-29
ENSG00000128989	10776	ARPP19	cAMP regulated phosphoprotein 19	2654.16383973133	-0.656238866923618	1.71072088142563e-29
ENSG00000137563	8836	GGH	gamma-glutamyl hydrolase	1426.65523783253	-0.798692503517339	1.8654070735155e-29
ENSG00000115363	84141	EVA1A	eva-1 homolog A, regulator of programmed cell death	213.695506114703	1.98950253460959	2.25400231700699e-29
ENSG00000103253	84264	HAGHL	hydroxyacylglutathione hydrolase like	339.865471498109	1.54165155463545	3.44511452676964e-29
ENSG00000151640	10570	DPYSL4	dihydropyrimidinase like 4	655.14288840413	1.0675917182879	3.45579353922262e-29
ENSG00000173153	2101	ESRRA	estrogen related receptor alpha	400.930618141	1.36061302693755	3.96727988963066e-29
ENSG00000137959	10964	IFI44L	interferon induced protein 44 like	132.246862119899	4.16852968433814	4.00521063205219e-29
ENSG00000124098	116151	FAM210B	family with sequence similarity 210 member B	1208.80773112404	0.880637446231326	4.84564226809108e-29
ENSG00000154493	118611	C10orf90	chromosome 10 open reading frame 90	679.024610783116	1.08830033117649	5.00664716223711e-29
ENSG00000143401	81611	ANP32E	acidic nuclear phosphoprotein 32 family member E	2358.71764258294	-0.647699635917018	5.66408989266929e-29
ENSG00000166292	55273	TMEM100	transmembrane protein 100	212.459890296469	-1.63699210635522	5.76952691090163e-29
ENSG00000146938	57502	NLGN4X	neuroligin 4, X-linked	54.3515618215819	-3.87202762510809	6.12301559734435e-29
ENSG00000103018	80777	CYB5B	cytochrome b5 type B	1778.86963949355	-0.714346479199911	6.47460540217298e-29
ENSG00000092621	26227	PHGDH	phosphoglycerate dehydrogenase	2334.22471716131	0.709996159588592	7.08960510211126e-29
ENSG00000167716	124997	WDR81	WD repeat domain 81	614.782053321766	1.1362608552811	7.83205110864077e-29
ENSG00000176978	29952	DPP7	dipeptidyl peptidase 7	1344.69004809759	0.894038892742197	8.09179644641662e-29
ENSG00000059804	6515	SLC2A3	solute carrier family 2 member 3	721.510178179412	1.20771231203438	8.38484457927205e-29
ENSG00000141574	6398	SECTM1	secreted and transmembrane 1	656.926389502182	-0.973828377918997	9.19062475756962e-29
ENSG00000175414	285598	ARL10	ADP ribosylation factor like GTPase 10	423.970758239829	1.30304512955458	1.08340261124951e-28
ENSG00000115318	84695	LOXL3	lysyl oxidase like 3	5011.38316568309	0.558157161724427	1.37514412260256e-28
ENSG00000131378	23180	RFTN1	raftlin, lipid raft linker 1	443.773207322259	-1.16985440784686	1.3964852759159e-28
ENSG00000171867	5621	PRNP	prion protein	8893.51642175805	-0.611280258293069	1.40779528814634e-28
ENSG00000166788	113174	SAAL1	serum amyloid A like 1	645.913893968381	-1.01397940594123	1.63159603935922e-28
ENSG00000182871	80781	COL18A1	collagen type XVIII alpha 1 chain	2997.40243817518	0.613307271369729	1.95890016209455e-28
ENSG00000122786	800	CALD1	caldesmon 1	7216.4781816993	-0.547666762419284	2.60502243035008e-28
ENSG00000165507	11067	DEPP1	DEPP1, autophagy regulator	141.23482129708	3.02526062332928	3.25155242700751e-28
ENSG00000197977	54898	ELOVL2	ELOVL fatty acid elongase 2	518.510044972496	-1.13976110580308	3.40611775998876e-28
ENSG00000132646	5111	PCNA	proliferating cell nuclear antigen	5003.0922343702	-0.615248810202521	3.63646166786363e-28
ENSG00000197081	3482	IGF2R	insulin like growth factor 2 receptor	2557.83353283791	0.64236344682071	4.07503447859315e-28
ENSG00000122591	84668	FAM126A	family with sequence similarity 126 member A	3040.36047476977	-0.609155983980765	5.31417091496437e-28
ENSG00000099810	4507	MTAP	methylthioadenosine phosphorylase	961.891258692633	-0.874060072244364	5.68285272956673e-28
ENSG00000033170	2530	FUT8	fucosyltransferase 8	472.77331027258	-1.1320879663049	5.77966797974083e-28
ENSG00000152127	4249	MGAT5	mannosyl (alpha-1,6-)-glycoprotein beta-1,6-N-acetyl-glucosaminyltransferase	3223.51300746918	0.590819956799852	5.77966797974083e-28
ENSG00000021645	9369	NRXN3	neurexin 3	224.869987948707	-1.59402424503323	6.1305282683695e-28
ENSG00000145386	890	CCNA2	cyclin A2	1376.80167005286	-0.787288269980809	6.745452641335e-28
ENSG00000163430	11167	FSTL1	follistatin like 1	1833.76036922598	-0.715427124910023	7.78773654371028e-28
ENSG00000099860	4616	GADD45B	growth arrest and DNA damage inducible beta	164.941991517108	2.25922589476909	8.83528671306442e-28
ENSG00000172893	1717	DHCR7	7-dehydrocholesterol reductase	1226.726720549	-0.790873223330185	9.57454921014565e-28
ENSG00000166575	65084	TMEM135	transmembrane protein 135	355.994184622583	-1.25916104401956	1.56912565692433e-27
ENSG00000096433	3710	ITPR3	inositol 1,4,5-trisphosphate receptor type 3	1585.47735239182	0.775758752741875	1.82314282286542e-27
ENSG00000048052	9734	HDAC9	histone deacetylase 9	684.325734195353	1.06423556838684	2.00001041470326e-27
ENSG00000166986	4141	MARS	methionyl-tRNA synthetase	1921.15722424876	0.72791846626375	2.02913245943312e-27
ENSG00000089041	5027	P2RX7	purinergic receptor P2X 7	365.016390710314	1.53413382786676	2.10472964517993e-27
ENSG00000173482	5797	PTPRM	protein tyrosine phosphatase, receptor type M	529.651803195908	1.13104112482011	2.10472964517993e-27
ENSG00000196937	10447	FAM3C	family with sequence similarity 3 member C	1047.14964892477	-0.829897258867747	2.12264137942993e-27
ENSG00000089127	4938	OAS1	2'-5'-oligoadenylate synthetase 1	264.775065002241	1.9869942915216	2.13977706460427e-27
ENSG00000136010	160428	ALDH1L2	aldehyde dehydrogenase 1 family member L2	260.531761047809	1.68092978300691	2.38684923689599e-27
ENSG00000105519	828	CAPS	calcyphosine	700.739484170838	-0.928638959443163	2.39584450284138e-27
ENSG00000198517	7975	MAFK	MAF bZIP transcription factor K	301.808943336071	1.54706309897874	2.52424516813907e-27
ENSG00000176624	51320	MEX3C	mex-3 RNA binding family member C	1869.64556356197	-0.690297805932927	2.96986143463258e-27
ENSG00000006468	2115	ETV1	ETS variant 1	1945.93493739268	-0.669970075595784	3.00065349804508e-27
ENSG00000181449	6657	SOX2	SRY-box 2	440.200949129484	-1.14280398143496	3.05378498541006e-27
ENSG00000100889	5106	PCK2	phosphoenolpyruvate carboxykinase 2, mitochondrial	309.743406809898	1.47879769429867	3.13806384356579e-27
ENSG00000127663	23030	KDM4B	lysine demethylase 4B	459.105993976294	1.21494035723469	3.2695876297222e-27
ENSG00000116786	23207	PLEKHM2	pleckstrin homology and RUN domain containing M2	1029.036236442	0.847153127384056	3.55498300620618e-27
ENSG00000173621	78999	LRFN4	leucine rich repeat and fibronectin type III domain containing 4	418.89508010126	1.25659685025633	3.69630213876235e-27
ENSG00000077152	29089	UBE2T	ubiquitin conjugating enzyme E2 T	842.582878278805	-0.909464260277008	3.7208162236503e-27
ENSG00000103249	1186	CLCN7	chloride voltage-gated channel 7	908.505021002113	0.911177651773571	5.09539908816712e-27
ENSG00000171246	4884	NPTX1	neuronal pentraxin 1	161.371160402634	-2.02442015145699	7.93542233934448e-27
ENSG00000135842	116496	FAM129A	family with sequence similarity 129 member A	2571.85432912499	0.691072905181114	9.02214325022189e-27
ENSG00000204287	3122	HLA-DRA	major histocompatibility complex, class II, DR alpha	7922.46826668092	-0.687471746832667	9.72217745267477e-27
ENSG00000136160	1910	EDNRB	endothelin receptor type B	540.596563627744	-1.04550777828752	1.04284116849218e-26
ENSG00000110090	1374	CPT1A	carnitine palmitoyltransferase 1A	1868.79669698506	0.718398127062481	1.19825404216583e-26
ENSG00000120437	39	ACAT2	acetyl-CoA acetyltransferase 2	481.95335900366	-1.15180553033407	1.20798432552391e-26
ENSG00000230989	3281	HSBP1	heat shock factor binding protein 1	2269.76754348971	-0.647987915497052	1.34841813036388e-26
ENSG00000076706	4162	MCAM	melanoma cell adhesion molecule	4865.08163916973	0.567665766457041	1.57068738522156e-26
ENSG00000008513	6482	ST3GAL1	ST3 beta-galactoside alpha-2,3-sialyltransferase 1	536.564342524032	1.10823106288465	1.7528324862851e-26
ENSG00000198033	7278	TUBA3C	tubulin alpha 3c	48.0596059512774	-5.1644664469477	1.99983632842343e-26
ENSG00000103966	30844	EHD4	EH domain containing 4	868.5704437694	0.977337835806416	2.13444023068943e-26
ENSG00000108932	9120	SLC16A6	solute carrier family 16 member 6	106.628959384604	3.58283322015092	2.34528705306209e-26
ENSG00000138496	83666	PARP9	poly(ADP-ribose) polymerase family member 9	490.136129253451	1.38475308426194	2.35081556164973e-26
ENSG00000143933	805	CALM2	calmodulin 2	4761.92506649468	-0.581382266782628	2.50203562008033e-26
ENSG00000107201	23586	DDX58	DExD/H-box helicase 58	278.648312821866	1.7903734026365	2.58574157953132e-26
ENSG00000116489	829	CAPZA1	capping actin protein of muscle Z-line alpha subunit 1	2769.30525744593	-0.587549632360848	2.58820895788956e-26
ENSG00000114346	1894	ECT2	epithelial cell transforming 2	1228.426335589	-0.792195003943127	2.8128164055506e-26
ENSG00000183397	100128569	C19orf71	chromosome 19 open reading frame 71	800.652379079966	1.16543721743314	3.14266065832495e-26
ENSG00000079432	23152	CIC	capicua transcriptional repressor	1550.86671858527	0.73870702290051	4.63583646954654e-26
ENSG00000178773	27132	CPNE7	copine 7	115.343448070772	3.82437033011246	4.79081022983081e-26
ENSG00000163535	151246	SGO2	shugoshin 2	1163.87256386267	-0.869145454180302	5.95811747696122e-26
ENSG00000169679	699	BUB1	BUB1 mitotic checkpoint serine/threonine kinase	1318.9625367085	-0.769749850888179	5.97926379358282e-26
ENSG00000138795	51176	LEF1	lymphoid enhancer binding factor 1	784.968191716748	-0.889147895786633	6.02154657587631e-26
ENSG00000101003	9837	GINS1	GINS complex subunit 1	864.0665768038	-0.845410426427463	6.41563639248778e-26
ENSG00000162607	7398	USP1	ubiquitin specific peptidase 1	2396.30252498143	-0.648813843172503	7.62985646019518e-26
ENSG00000100292	3162	HMOX1	heme oxygenase 1	255.405410126625	1.64528188142773	8.90512394680284e-26
ENSG00000089685	332	BIRC5	baculoviral IAP repeat containing 5	2763.49354761979	-0.770240515674872	9.30456396233305e-26
ENSG00000117602	11123	RCAN3	RCAN family member 3	536.804109122873	-1.02570463993179	1.05119917372853e-25
ENSG00000134308	10971	YWHAQ	tyrosine 3-monooxygenase/tryptophan 5-monooxygenase activation protein theta	6029.80070376052	-0.654272647308337	1.24921342536377e-25
ENSG00000138434	6744	SSFA2	sperm specific antigen 2	3784.32935190427	-0.554220097870446	1.24921342536377e-25
ENSG00000159842	29	ABR	ABR, RhoGEF and GTPase activating protein	1881.23584976952	0.665125618680016	1.41878532595448e-25
ENSG00000127951	10875	FGL2	fibrinogen like 2	140.609560087838	2.41794357801806	1.60543534151597e-25
ENSG00000101040	23613	ZMYND8	zinc finger MYND-type containing 8	1366.00013458712	-0.722137207733548	2.09310807989746e-25
ENSG00000156299	7074	TIAM1	T cell lymphoma invasion and metastasis 1	504.132177703274	-1.13473300578619	2.7835267024969e-25
ENSG00000141576	114804	RNF157	ring finger protein 157	458.933514820554	-1.12162969425472	2.80006901255577e-25
ENSG00000139218	9169	SCAF11	SR-related CTD associated factor 11	2532.52023851555	-0.653176980491188	2.98152136050596e-25
ENSG00000063660	2817	GPC1	glypican 1	2468.43734424415	0.735140777087882	3.77492370377282e-25
ENSG00000109971	3312	HSPA8	heat shock protein family A (Hsp70) member 8	18825.2025779989	-0.492585880334953	4.62884402589909e-25
ENSG00000165304	9833	MELK	maternal embryonic leucine zipper kinase	1315.82862834347	-0.76319415250491	4.62884402589909e-25
ENSG00000178966	80010	RMI1	RecQ mediated genome instability 1	433.123971623361	-1.12341352398164	4.67818253709063e-25
ENSG00000123684	9926	LPGAT1	lysophosphatidylglycerol acyltransferase 1	1591.05671787739	-0.688534189103177	4.75659444300964e-25
ENSG00000167325	6240	RRM1	ribonucleotide reductase catalytic subunit M1	2122.6302519109	-0.638984563237489	5.13300745086998e-25
ENSG00000205413	54809	SAMD9	sterile alpha motif domain containing 9	727.289279048766	1.22010283951746	5.50257207078741e-25
ENSG00000139926	122786	FRMD6	FERM domain containing 6	1159.1983123152	-0.772158616500266	8.38065334948017e-25
ENSG00000231389	3113	HLA-DPA1	major histocompatibility complex, class II, DP alpha 1	3032.13009080542	-0.591320339742494	8.5428116341756e-25
ENSG00000148840	23082	PPRC1	peroxisome proliferator-activated receptor gamma, coactivator-related 1	696.402132592764	0.987278167511482	8.78975858969431e-25
ENSG00000125931	4435	CITED1	Cbp/p300 interacting transactivator with Glu/Asp rich carboxy-terminal domain 1	118.812956710705	2.69770507619816	9.65890590309035e-25
ENSG00000167522	29123	ANKRD11	ankyrin repeat domain 11	2813.84123097504	0.582403381993298	1.01430645975366e-24
ENSG00000187079	7003	TEAD1	TEA domain transcription factor 1	2717.55457301418	-0.579793703608643	1.01577322971607e-24
ENSG00000182326	716	C1S	complement C1s	106.308845628083	-2.15429360147256	1.20428936309289e-24
ENSG00000134247	5738	PTGFRN	prostaglandin F2 receptor inhibitor	4704.83055368797	-0.580181350762763	1.36011957371992e-24
ENSG00000142156	1291	COL6A1	collagen type VI alpha 1 chain	5468.79545402074	0.557025377789645	1.37452942141625e-24
ENSG00000182534	439921	MXRA7	matrix remodeling associated 7	1182.93756678835	-0.726384544573174	1.39017194279921e-24
ENSG00000052749	23223	RRP12	ribosomal RNA processing 12 homolog	589.447243078527	1.01658659400604	1.71572810695837e-24
ENSG00000167702	90990	KIFC2	kinesin family member C2	401.701540823035	1.35215452616649	1.97805402191172e-24
ENSG00000173821	57674	RNF213	ring finger protein 213	2908.61040193743	0.648778407659033	2.11570331376902e-24
ENSG00000100393	2033	EP300	E1A binding protein p300	1460.80694045244	0.701079261787791	2.18732642188405e-24
ENSG00000111261	54682	MANSC1	MANSC domain containing 1	209.930686957799	-1.47824829503816	2.21274539488134e-24
ENSG00000041982	3371	TNC	tenascin C	22347.3909565944	-0.424277585420774	2.3537792705736e-24
ENSG00000057608	2665	GDI2	GDP dissociation inhibitor 2	1818.90735083624	-0.666672041614481	2.55646002639887e-24
ENSG00000182492	633	BGN	biglycan	578.424104564465	1.03872672331922	2.5731082198506e-24
ENSG00000104368	5327	PLAT	plasminogen activator, tissue type	3370.88823416963	-0.642944015838237	2.82030050891288e-24
ENSG00000115267	64135	IFIH1	interferon induced with helicase C domain 1	356.916699810839	1.54505940061182	3.30561738210113e-24
ENSG00000103540	9738	CCP110	centriolar coiled-coil protein 110	859.783449413861	-0.87902671712134	3.75413067381735e-24
ENSG00000086061	3301	DNAJA1	DnaJ heat shock protein family (Hsp40) member A1	3135.81296665887	-0.600611700373495	3.83412736369976e-24
ENSG00000133639	694	BTG1	BTG anti-proliferation factor 1	865.868044715964	0.879456004892335	3.89767024722379e-24
ENSG00000060138	8531	YBX3	Y-box binding protein 3	702.300894774849	0.971939626349399	4.24325583798823e-24
ENSG00000110092	595	CCND1	cyclin D1	2961.06614219423	0.619286942575707	4.41127845188451e-24
ENSG00000113558	6500	SKP1	S-phase kinase associated protein 1	2140.46671489391	-0.612461712039022	5.95775816264869e-24
ENSG00000148019	84131	CEP78	centrosomal protein 78	759.621749056612	-0.876730934000537	6.11761033190138e-24
ENSG00000092841	4637	MYL6	myosin light chain 6	3808.88047845511	-0.659472108176141	6.6433231387874e-24
ENSG00000100504	5836	PYGL	glycogen phosphorylase L	1652.48745715143	-0.64484927518692	6.75319427725093e-24
ENSG00000143228	83540	NUF2	NUF2, NDC80 kinetochore complex component	844.402220859904	-0.879132671512915	7.77960718241393e-24
ENSG00000128965	79094	CHAC1	ChaC glutathione specific gamma-glutamylcyclotransferase 1	101.761753155211	3.28785095959281	7.97200647909268e-24
ENSG00000144668	3680	ITGA9	integrin subunit alpha 9	757.161622409812	-0.837570276823962	8.47780490763072e-24
ENSG00000084234	334	APLP2	amyloid beta precursor like protein 2	6438.26617638777	-0.543949039510896	8.47970993960423e-24
ENSG00000112029	26271	FBXO5	F-box protein 5	433.41736373709	-1.10865564415163	8.60303967906148e-24
ENSG00000105401	11140	CDC37	cell division cycle 37	1358.89805483316	0.721175902516574	8.86060905636059e-24
ENSG00000159445	117145	THEM4	thioesterase superfamily member 4	1033.17406562732	-0.811645406220477	9.12913491479891e-24
ENSG00000078053	273	AMPH	amphiphysin	155.159693084374	2.1334201850114	9.44549933818851e-24
ENSG00000108175	57178	ZMIZ1	zinc finger MIZ-type containing 1	2424.00056640592	0.583242528900596	1.23150494846863e-23
ENSG00000131584	116983	ACAP3	ArfGAP with coiled-coil, ankyrin repeat and PH domains 3	839.615003556646	1.08846767065815	1.48206529080172e-23
ENSG00000010292	9918	NCAPD2	non-SMC condensin I complex subunit D2	3953.83133538127	-0.508791493604495	1.62427985829256e-23
ENSG00000143669	1130	LYST	lysosomal trafficking regulator	3071.113415788	0.608002216939682	1.73578454874267e-23
ENSG00000166123	84706	GPT2	glutamic--pyruvic transaminase 2	459.126816510407	1.12252764166265	1.7362422341727e-23
ENSG00000137965	10561	IFI44	interferon induced protein 44	525.512950255931	1.27177852303168	1.74738994923201e-23
ENSG00000128578	57464	STRIP2	striatin interacting protein 2	582.264862554884	1.19568558593498	1.77574158824127e-23
ENSG00000104490	83988	NCALD	neurocalcin delta	456.013356945087	-1.02520050917135	1.8115047108397e-23
ENSG00000105379	2109	ETFB	electron transfer flavoprotein beta subunit	448.566949575537	-1.06362754538749	1.82928360395494e-23
ENSG00000106078	23242	COBL	cordon-bleu WH2 repeat protein	475.808584496547	1.12745084188309	1.99989617490361e-23
ENSG00000090006	8425	LTBP4	latent transforming growth factor beta binding protein 4	1027.87068797632	0.933445270442109	2.01477616560105e-23
ENSG00000142173	1292	COL6A2	collagen type VI alpha 2 chain	7124.18497639917	0.458039266249714	2.04701613619117e-23
ENSG00000065526	23013	SPEN	spen family transcriptional repressor	955.986986091297	0.851704364370627	2.14286040898956e-23
ENSG00000276600	338382	RAB7B	RAB7B, member RAS oncogene family	310.131241794043	-1.28965711835287	2.43511177240749e-23
ENSG00000057019	131566	DCBLD2	discoidin, CUB and LCCL domain containing 2	2128.60806764334	-0.681888948209695	3.3372533217362e-23
ENSG00000148730	1979	EIF4EBP2	eukaryotic translation initiation factor 4E binding protein 2	1700.8621803554	-0.651038681043146	3.67113301340195e-23
ENSG00000048740	10659	CELF2	CUGBP Elav-like family member 2	488.000053854528	-1.02427118379297	3.88970201303784e-23
ENSG00000175197	1649	DDIT3	DNA damage inducible transcript 3	297.771496553621	1.58886682690609	4.0733110601946e-23
ENSG00000225733	100505641	FGD5-AS1	FGD5 antisense RNA 1	2550.35334967221	-0.558364422001825	4.24034682308016e-23
ENSG00000028528	6642	SNX1	sorting nexin 1	2984.92761160195	-0.555059269519787	4.46471496755594e-23
ENSG00000183454	2903	GRIN2A	glutamate ionotropic receptor NMDA type subunit 2A	112.702347061448	2.71219822190142	4.49799769004425e-23
ENSG00000090889	24137	KIF4A	kinesin family member 4A	1119.41642504556	-0.730106378668201	4.53704666631963e-23
ENSG00000175785	145270	PRIMA1	proline rich membrane anchor 1	96.7021424711108	-2.16345286072031	4.87361010392387e-23
ENSG00000185920	5727	PTCH1	patched 1	689.315009767633	-0.874969866620328	5.5675505769801e-23
ENSG00000203485	64423	INF2	inverted formin, FH2 and WH2 domain containing	1127.92534016129	0.846249966456483	5.81927517926768e-23
ENSG00000136068	2317	FLNB	filamin B	1720.82368288136	0.775329574455693	6.36420205082829e-23
ENSG00000164056	10252	SPRY1	sprouty RTK signaling antagonist 1	103.430251788223	2.84048547588301	7.83559788839997e-23
ENSG00000008441	4784	NFIX	nuclear factor I X	1329.00234545754	0.723267748956098	8.36640678157383e-23
ENSG00000103187	23406	COTL1	coactosin like F-actin binding protein 1	4883.06378904044	-0.623628762431239	1.15363351094433e-22
ENSG00000142188	757	TMEM50B	transmembrane protein 50B	650.205830529515	-0.919332835956179	1.30625808706314e-22
ENSG00000076770	55796	MBNL3	muscleblind like splicing regulator 3	619.817276342896	-0.970292725887145	1.33830255263125e-22
ENSG00000024526	55635	DEPDC1	DEP domain containing 1	869.301654273284	-0.765514534504574	1.37424061687669e-22
ENSG00000142669	83442	SH3BGRL3	SH3 domain binding glutamate rich protein like 3	2095.7677306946	-0.631823410407523	1.63898315263437e-22
ENSG00000244486	91179	SCARF2	scavenger receptor class F member 2	1506.25545553604	0.692624678190222	1.63898315263437e-22
ENSG00000104885	84444	DOT1L	DOT1 like histone lysine methyltransferase	963.96295371868	0.873647774994038	1.66427732085307e-22
ENSG00000076201	25930	PTPN23	protein tyrosine phosphatase, non-receptor type 23	1077.52930041385	0.794787635859579	1.84561614365344e-22
ENSG00000088280	55616	ASAP3	ArfGAP with SH3 domain, ankyrin repeat and PH domain 3	336.252535698007	-1.14052604029546	2.12657333270204e-22
ENSG00000125848	23767	FLRT3	fibronectin leucine rich transmembrane protein 3	1038.69550648444	-0.769130841525233	2.25902013218459e-22
ENSG00000070214	23446	SLC44A1	solute carrier family 44 member 1	1562.25568482113	-0.646509869774861	2.31087836081364e-22
ENSG00000143742	6726	SRP9	signal recognition particle 9	1877.81727775054	-0.64146955169352	2.55319600327499e-22
ENSG00000006634	10926	DBF4	DBF4 zinc finger	715.854552757567	-0.908262487200876	2.65236056228731e-22
ENSG00000170638	80305	TRABD	TraB domain containing	497.458539687547	1.04982129181668	2.737257504337e-22
ENSG00000134986	9315	NREP	neuronal regeneration related protein	883.326139901577	-0.760449391820405	2.73848053794258e-22
ENSG00000164050	5364	PLXNB1	plexin B1	468.494821934657	1.23106136769314	2.78057937945072e-22
ENSG00000136238	5879	RAC1	Rac family small GTPase 1	3718.29481789653	-0.51618297643406	2.94687314389081e-22
ENSG00000196376	222553	SLC35F1	solute carrier family 35 member F1	336.085452860618	-1.18641177418276	2.97062329960926e-22
ENSG00000044524	2042	EPHA3	EPH receptor A3	1240.75909978837	-0.69000124344496	3.00005192735737e-22
ENSG00000067955	865	CBFB	core-binding factor beta subunit	2092.11321286862	-0.613060746209044	3.46364337272949e-22
ENSG00000101695	54941	RNF125	ring finger protein 125	112.879696050147	-2.14111690043156	3.65065016125573e-22
ENSG00000123473	6491	STIL	STIL, centriolar assembly protein	850.609817881651	-0.76819255810465	3.83069725007049e-22
ENSG00000119396	51552	RAB14	RAB14, member RAS oncogene family	2051.94385892847	-0.605563782770415	3.85841328243606e-22
ENSG00000082641	4779	NFE2L1	nuclear factor, erythroid 2 like 1	4309.62553489886	0.539741085739859	4.0848390239729e-22
ENSG00000187210	2650	GCNT1	glucosaminyl (N-acetyl) transferase 1, core 2	132.862261812217	-1.75689384880053	4.28215383017521e-22
ENSG00000100106	11078	TRIOBP	TRIO and F-actin binding protein	3390.22559031603	-0.524331334630411	4.38164354226046e-22
ENSG00000196628	6925	TCF4	transcription factor 4	1025.97230684449	-0.757918127899397	4.47099464047807e-22
ENSG00000081087	28962	OSTM1	osteopetrosis associated transmembrane protein 1	1345.29274664277	0.754912640748366	4.85739855010229e-22
ENSG00000092758	1299	COL9A3	collagen type IX alpha 3 chain	8761.56509164666	0.674336806355271	5.24981295682014e-22
ENSG00000167658	1938	EEF2	eukaryotic translation elongation factor 2	17249.8160440476	0.47655220615177	5.43500347066919e-22
ENSG00000168481	203190	LGI3	leucine rich repeat LGI family member 3	102.704353947674	2.78705792575417	5.72645327116595e-22
ENSG00000113621	79770	TXNDC15	thioredoxin domain containing 15	1022.10175501072	-0.839226193164945	6.40520518838441e-22
ENSG00000135766	54583	EGLN1	egl-9 family hypoxia inducible factor 1	1771.70302159527	0.688763761309423	6.40520518838441e-22
ENSG00000158887	4359	MPZ	myelin protein zero	52.489405012749	-3.02359263334658	6.40520518838441e-22
ENSG00000119899	26503	SLC17A5	solute carrier family 17 member 5	226.207809565689	1.70016193430549	6.56056309203544e-22
ENSG00000079459	2222	FDFT1	farnesyl-diphosphate farnesyltransferase 1	2154.8603612921	-0.61294562014569	6.98842431146415e-22
ENSG00000179820	91663	MYADM	myeloid associated differentiation marker	292.775095835023	1.35019138088379	8.25192356370432e-22
ENSG00000013588	9052	GPRC5A	G protein-coupled receptor class C group 5 member A	572.791079411731	0.987407597772218	8.66422719182378e-22
ENSG00000136158	10253	SPRY2	sprouty RTK signaling antagonist 2	1692.21199149064	-0.618563103367286	1.03015984465041e-21
ENSG00000172159	257019	FRMD3	FERM domain containing 3	244.502570862524	-1.31764202345605	1.08977007057961e-21
ENSG00000188130	6300	MAPK12	mitogen-activated protein kinase 12	449.185834793318	1.17656314298497	1.10687947248666e-21
ENSG00000168411	55159	RFWD3	ring finger and WD repeat domain 3	1863.97066747186	-0.595312321779809	1.16468452919763e-21
ENSG00000072310	6720	SREBF1	sterol regulatory element binding transcription factor 1	877.58241542464	-0.789267412437276	1.1744777876879e-21
ENSG00000010818	3097	HIVEP2	human immunodeficiency virus type I enhancer binding protein 2	289.31594187148	1.33459752436844	1.2138156559063e-21
ENSG00000136108	26586	CKAP2	cytoskeleton associated protein 2	1148.50791193094	-0.689723303033858	1.52173319103215e-21
ENSG00000172927	26579	MYEOV	myeloma overexpressed	314.865563739795	1.27303989002186	1.75467996568288e-21
ENSG00000136205	64759	TNS3	tensin 3	5572.99610973714	0.453765526368517	2.29917832052593e-21
ENSG00000177409	219285	SAMD9L	sterile alpha motif domain containing 9 like	470.136364402144	1.21136373994189	2.96550077476458e-21
ENSG00000054793	10079	ATP9A	ATPase phospholipid transporting 9A (putative)	1894.64610537824	0.607276921171281	3.56157051343979e-21
ENSG00000198743	6526	SLC5A3	solute carrier family 5 member 3	6013.72371157355	0.520015578240083	3.60988359140488e-21
ENSG00000114554	5361	PLXNA1	plexin A1	853.044470144249	0.799816150434029	4.07845125806915e-21
ENSG00000131089	23229	ARHGEF9	Cdc42 guanine nucleotide exchange factor 9	586.033418626246	-0.891491052074041	4.21349341925415e-21
ENSG00000170581	6773	STAT2	signal transducer and activator of transcription 2	1112.1963767002	0.954985795759904	4.31647907287497e-21
ENSG00000143344	23179	RGL1	ral guanine nucleotide dissociation stimulator like 1	866.877375382341	-0.761532271961101	4.52691924951739e-21
ENSG00000113810	10051	SMC4	structural maintenance of chromosomes 4	2833.63617336953	-0.553675910380911	4.69870897719651e-21
ENSG00000104765	665	BNIP3L	BCL2 interacting protein 3 like	977.930215002818	0.787672663543499	5.41236779888231e-21
ENSG00000114978	55233	MOB1A	MOB kinase activator 1A	2133.71196619353	-0.574719245405648	7.53630194539639e-21
ENSG00000114166	8850	KAT2B	lysine acetyltransferase 2B	2329.43997938688	-0.579643321846894	7.65244216516182e-21
ENSG00000104866	284352	PPP1R37	protein phosphatase 1 regulatory subunit 37	600.55439944176	0.950763872818063	7.69452092675877e-21
ENSG00000143776	8476	CDC42BPA	CDC42 binding protein kinase alpha	1604.94089376541	-0.600697637751255	8.48120467359413e-21
ENSG00000089154	10985	GCN1	GCN1, eIF2 alpha kinase activator homolog	1673.90662877652	0.633145983585468	1.07751504033634e-20
ENSG00000119203	51692	CPSF3	cleavage and polyadenylation specific factor 3	1191.59603997235	-0.667123994933898	1.18770218337002e-20
ENSG00000139329	4060	LUM	lumican	375.088345018954	-1.08396111310038	1.21855975318608e-20
ENSG00000137807	9493	KIF23	kinesin family member 23	1396.65046740253	-0.674161995510218	1.28097817582469e-20
ENSG00000112379	57221	ARFGEF3	ARFGEF family member 3	124.231044546265	2.28436514061407	1.29647311108635e-20
ENSG00000205403	3426	CFI	complement factor I	420.156655292628	-1.01501025979632	1.31886152955287e-20
ENSG00000107862	8729	GBF1	golgi brefeldin A resistant guanine nucleotide exchange factor 1	1776.44993676471	0.606191281633209	1.3294725265323e-20
ENSG00000187123	130574	LYPD6	LY6/PLAUR domain containing 6	559.850416104618	0.942695091636183	1.48361055654197e-20
ENSG00000125912	56926	NCLN	nicalin	1532.30904414966	0.665020026013778	1.56482734374604e-20
ENSG00000124795	7913	DEK	DEK proto-oncogene	3190.87943672627	-0.563052800442973	1.79356460816973e-20
ENSG00000106266	29886	SNX8	sorting nexin 8	1212.72420122582	0.742265717651429	1.82696460711958e-20
ENSG00000184661	157313	CDCA2	cell division cycle associated 2	684.64220527311	-0.813702351719705	1.82696460711958e-20
ENSG00000184371	1435	CSF1	colony stimulating factor 1	275.251860412018	1.33127149600301	1.88849690868991e-20
ENSG00000106948	80709	AKNA	AT-hook transcription factor	91.7435507222191	2.86234622974127	1.89610936885759e-20
ENSG00000173442	254102	EHBP1L1	EH domain binding protein 1 like 1	1893.32459674633	0.612746548351183	2.13446247587151e-20
ENSG00000185697	4603	MYBL1	MYB proto-oncogene like 1	448.908389814958	-1.02365972828394	2.29049964417847e-20
ENSG00000087586	6790	AURKA	aurora kinase A	1506.8483093941	-0.678395451752402	2.80958309604227e-20
ENSG00000007174	1770	DNAH9	dynein axonemal heavy chain 9	118.566696829634	-1.79896138746441	2.84889628430083e-20
ENSG00000065150	3843	IPO5	importin 5	1824.79755962796	-0.598371357140977	2.88677481720853e-20
ENSG00000135052	51280	GOLM1	golgi membrane protein 1	2877.27168255065	-0.525636084552691	3.06020970787062e-20
ENSG00000116584	9181	ARHGEF2	Rho/Rac guanine nucleotide exchange factor 2	1077.59987196196	0.823491283507447	3.10172418411809e-20
ENSG00000151725	79682	CENPU	centromere protein U	1144.7326329181	-0.661677831804159	3.68419416887378e-20
ENSG00000138080	11117	EMILIN1	elastin microfibril interfacer 1	3456.58349982768	0.59645875172501	3.83834413986162e-20
ENSG00000104369	56704	JPH1	junctophilin 1	80.6809368487939	3.47469539397698	3.92397354704563e-20
ENSG00000147274	27316	RBMX	RNA binding motif protein, X-linked	2672.97252887805	-0.540228435499778	3.97201555960154e-20
ENSG00000020577	23034	SAMD4A	sterile alpha motif domain containing 4A	1034.12589588001	0.796051048904398	4.04905771255346e-20
ENSG00000184564	84189	SLITRK6	SLIT and NTRK like family member 6	548.358595112503	-0.907097216011279	4.28472997667282e-20
ENSG00000198824	283489	CHAMP1	chromosome alignment maintaining phosphoprotein 1	724.900170535591	-0.779525757770877	4.82752102066234e-20
ENSG00000166913	7529	YWHAB	tyrosine 3-monooxygenase/tryptophan 5-monooxygenase activation protein beta	6266.03244345689	-0.466047069546499	4.95565993076026e-20
ENSG00000138758	55752	SEPTIN11	septin 11	2168.75763875038	-0.535500086296842	4.99845771025874e-20
ENSG00000018408	25937	WWTR1	WW domain containing transcription regulator 1	4212.0937858793	-0.507283824125406	5.25523581395848e-20
ENSG00000184897	8971	H1FX	H1 histone family member X	1427.17859714061	0.659873510581403	5.53578257359038e-20
ENSG00000157456	9133	CCNB2	cyclin B2	963.357677476301	-0.731222641206676	5.62712382979114e-20
ENSG00000077264	5063	PAK3	p21 (RAC1) activated kinase 3	131.662873815912	-1.76525902326346	5.8414854339582e-20
ENSG00000168079	286133	SCARA5	scavenger receptor class A member 5	109.42126982267	-1.882624860713	5.98025793054146e-20
ENSG00000181019	1728	NQO1	NAD(P)H quinone dehydrogenase 1	11424.9570601134	-0.542151403863459	5.98734778008584e-20
ENSG00000107581	8661	EIF3A	eukaryotic translation initiation factor 3 subunit A	4989.95650488422	0.46355264998318	6.06514550493761e-20
ENSG00000055332	5610	EIF2AK2	eukaryotic translation initiation factor 2 alpha kinase 2	1467.37920542627	0.756021501942817	6.1343611017488e-20
ENSG00000146918	54892	NCAPG2	non-SMC condensin II complex subunit G2	2359.29773079311	-0.527703973617114	6.1343611017488e-20
ENSG00000126247	826	CAPNS1	calpain small subunit 1	2282.91118671948	-0.593758488066096	7.62024114851914e-20
ENSG00000197063	4097	MAFG	MAF bZIP transcription factor G	1627.2272284342	0.604794049919457	8.10884827569963e-20
ENSG00000152332	127933	UHMK1	U2AF homology motif kinase 1	3436.06221935904	-0.51008420222794	8.28142713932757e-20
ENSG00000188612	6613	SUMO2	small ubiquitin-like modifier 2	979.007988984458	-0.774264857190286	8.332984746931e-20
ENSG00000140939	8996	NOL3	nucleolar protein 3	270.21644443954	1.32081820608972	8.43631528173027e-20
ENSG00000117528	5825	ABCD3	ATP binding cassette subfamily D member 3	926.459609298998	-0.708923512941555	8.44305436224734e-20
ENSG00000197093	79690	GAL3ST4	galactose-3-O-sulfotransferase 4	407.105620735524	-0.988662848736942	8.67839904192116e-20
ENSG00000100241	6305	SBF1	SET binding factor 1	2725.52428524065	0.541761320777362	8.94514747634214e-20
ENSG00000109046	26118	WSB1	WD repeat and SOCS box containing 1	922.080061068896	1.14519133305909	9.05256795704879e-20
ENSG00000143815	3930	LBR	lamin B receptor	1675.8640722032	-0.610889508533132	9.15395061059902e-20
ENSG00000178980	6415	SELENOW	selenoprotein W	554.388056963149	-0.94416830083768	1.11023632641598e-19
ENSG00000105835	10135	NAMPT	nicotinamide phosphoribosyltransferase	1239.20651759161	0.706857903250913	1.15907349130883e-19
ENSG00000163629	5783	PTPN13	protein tyrosine phosphatase, non-receptor type 13	818.055632483103	-0.780738188085938	1.18003991173672e-19
ENSG00000137877	51332	SPTBN5	spectrin beta, non-erythrocytic 5	102.570408182215	3.05391878744896	1.61339673711637e-19
ENSG00000179832	727957	MROH1	maestro heat like repeat family member 1	443.18318662988	1.12651547897736	1.68310399414124e-19
ENSG00000167291	125058	TBC1D16	TBC1 domain family member 16	3207.47733287476	0.529529808523823	1.76089127199192e-19
ENSG00000136542	11227	GALNT5	polypeptide N-acetylgalactosaminyltransferase 5	126.229404123155	2.26693663855906	1.83772339952757e-19
ENSG00000155111	23097	CDK19	cyclin dependent kinase 19	592.722213505344	-0.851722760380536	1.85426568727725e-19
ENSG00000122692	55234	SMU1	SMU1, DNA replication regulator and spliceosomal factor	796.657007496812	-0.782752096601214	2.01004651915468e-19
ENSG00000189403	3146	HMGB1	high mobility group box 1	3251.03559848718	-0.591743286028858	2.24467293697e-19
ENSG00000139514	6541	SLC7A1	solute carrier family 7 member 1	1495.52159750258	0.620064813342006	2.29411913290917e-19
ENSG00000064932	22904	SBNO2	strawberry notch homolog 2	1001.25613374759	0.718023883585692	2.35399219223565e-19
ENSG00000198598	4326	MMP17	matrix metallopeptidase 17	1138.56240760495	0.678493463242356	2.47180128150763e-19
ENSG00000101199	55738	ARFGAP1	ADP ribosylation factor GTPase activating protein 1	1611.06797819768	0.809152115408635	2.50588338223621e-19
ENSG00000095739	25805	BAMBI	BMP and activin membrane bound inhibitor	3023.22219529078	-0.51078476939482	2.65981037152155e-19
ENSG00000112742	7272	TTK	TTK protein kinase	686.908192207741	-0.778357753916462	2.66143373230439e-19
ENSG00000102804	8848	TSC22D1	TSC22 domain family member 1	2452.52438985516	-0.583556615299773	2.88319744723175e-19
ENSG00000103326	6650	CAPN15	calpain 15	563.699682862205	0.95056461156896	3.21018853225383e-19
ENSG00000104738	4173	MCM4	minichromosome maintenance complex component 4	2858.53180739139	-0.519068837536727	3.23867598089201e-19
ENSG00000102038	6594	SMARCA1	SWI/SNF related, matrix associated, actin dependent regulator of chromatin, subfamily a, member 1	1587.03256874493	-0.58167344658045	3.25238005225749e-19
ENSG00000008282	6856	SYPL1	synaptophysin like 1	2229.90181938777	-0.562961720532207	3.330358812556e-19
ENSG00000096063	6732	SRPK1	SRSF protein kinase 1	733.308841279927	-0.772806027218565	3.4341209519664e-19
ENSG00000213088	2532	ACKR1	atypical chemokine receptor 1 (Duffy blood group)	122.477832204216	-1.70516151065402	3.69236841590228e-19
ENSG00000162645	2634	GBP2	guanylate binding protein 2	384.572842268898	-1.01198222023591	3.95000396021461e-19
ENSG00000154839	220134	SKA1	spindle and kinetochore associated complex subunit 1	510.78525201866	-0.885766006489355	4.19249947415967e-19
ENSG00000108946	5573	PRKAR1A	protein kinase cAMP-dependent type I regulatory subunit alpha	5455.41979398763	-0.448197804436447	4.92086213464201e-19
ENSG00000164111	308	ANXA5	annexin A5	6714.5042545812	0.495955857125744	5.2529902136949e-19
ENSG00000271601	128077	LIX1L	limb and CNS expressed 1 like	636.394725620836	-0.835312015092946	5.65850482042489e-19
ENSG00000080031	5794	PTPRH	protein tyrosine phosphatase, receptor type H	235.171350345141	1.42046574527264	5.82441046494527e-19
ENSG00000110811	10536	P3H3	prolyl 3-hydroxylase 3	1108.59486688315	0.687888199721553	5.85832206151366e-19
ENSG00000153283	10225	CD96	CD96 molecule	78.7604861592533	-2.11465027718019	6.50159185761379e-19
ENSG00000116199	9917	FAM20B	FAM20B, glycosaminoglycan xylosylkinase	1440.28035001039	-0.735781800400535	6.86979450731537e-19
ENSG00000204386	4758	NEU1	neuraminidase 1	1330.36801028367	0.673777969896061	8.54284751342366e-19
ENSG00000186635	116985	ARAP1	ArfGAP with RhoGAP domain, ankyrin repeat and PH domain 1	853.386814312628	0.739553160257127	1.00617814853971e-18
ENSG00000012660	60481	ELOVL5	ELOVL fatty acid elongase 5	1928.09713112733	-0.545572365231862	1.01784847816715e-18
ENSG00000118193	9928	KIF14	kinesin family member 14	1405.80995964973	-0.612330352628428	1.01922596881801e-18
ENSG00000162302	8986	RPS6KA4	ribosomal protein S6 kinase A4	927.821040989759	0.726847654973306	1.02590859184363e-18
ENSG00000091972	4345	CD200	CD200 molecule	78.3733525918674	-2.13812251680573	1.03429887945633e-18
ENSG00000188313	5359	PLSCR1	phospholipid scramblase 1	483.552346670531	1.08643624201675	1.08782991606112e-18
ENSG00000198843	51714	SELENOT	selenoprotein T	794.443866666784	-0.775305205975282	1.11928082958991e-18
ENSG00000125844	6238	RRBP1	ribosome binding protein 1	6070.24609351987	0.443495502995428	1.12531312926859e-18
ENSG00000065809	83641	FAM107B	family with sequence similarity 107 member B	213.630202158966	-1.34273050866938	1.12632517847532e-18
ENSG00000102054	5931	RBBP7	RB binding protein 7, chromatin remodeling factor	1125.67780631539	-0.631613411835839	1.17415274968412e-18
ENSG00000171444	4163	MCC	mutated in colorectal cancers	166.406746699633	1.71722890310833	1.18048856226133e-18
ENSG00000168615	8754	ADAM9	ADAM metallopeptidase domain 9	3364.2926689865	-0.493024308870507	1.29332011081504e-18
ENSG00000197119	123096	SLC25A29	solute carrier family 25 member 29	278.024863729774	1.55521142264344	1.29332011081504e-18
ENSG00000112159	23195	MDN1	midasin AAA ATPase 1	1264.88777368169	0.688590732228176	1.3930630515821e-18
ENSG00000119938	5507	PPP1R3C	protein phosphatase 1 regulatory subunit 3C	198.315776377895	1.51761749814214	1.41128872357633e-18
ENSG00000064651	6558	SLC12A2	solute carrier family 12 member 2	1495.18445769805	-0.586387816441513	1.46008213573506e-18
ENSG00000108375	54894	RNF43	ring finger protein 43	217.344908337645	-1.28604968295941	1.51675306429734e-18
ENSG00000243317	647087	STMP1	short transmembrane mitochondrial protein 1	1025.65245847877	-0.663909011609784	1.63320746643669e-18
ENSG00000175220	392	ARHGAP1	Rho GTPase activating protein 1	1127.59211296004	-0.638571774368155	1.85431813889681e-18
ENSG00000183597	128989	TANGO2	transport and golgi organization 2 homolog	398.659228434793	1.11518498383277	1.92269128023507e-18
ENSG00000110619	833	CARS	cysteinyl-tRNA synthetase	661.420536049134	0.870220422659178	2.31869181961577e-18
ENSG00000169607	150468	CKAP2L	cytoskeleton associated protein 2 like	1223.58010352195	-0.622460303137305	2.38870483677989e-18
ENSG00000142634	79180	EFHD2	EF-hand domain family member D2	637.513150642497	0.999299952878884	2.49000370820958e-18
ENSG00000140545	4240	MFGE8	milk fat globule-EGF factor 8 protein	2096.20022608562	0.56114186736474	2.51127256605501e-18
ENSG00000164924	7534	YWHAZ	tyrosine 3-monooxygenase/tryptophan 5-monooxygenase activation protein zeta	9885.5663590224	-0.494401205536666	2.52827374781e-18
ENSG00000171223	3726	JUNB	JunB proto-oncogene, AP-1 transcription factor subunit	567.791789394588	-0.930623640992826	2.52827374781e-18
ENSG00000144366	51454	GULP1	GULP, engulfment adaptor PTB domain containing 1	1164.82116623097	-0.667810443300549	2.58324340829909e-18
ENSG00000173193	54625	PARP14	poly(ADP-ribose) polymerase family member 14	520.290916894259	1.09760241759088	2.59978940473645e-18
ENSG00000077782	2260	FGFR1	fibroblast growth factor receptor 1	478.934162590629	-0.885535468621237	3.00062479758431e-18
ENSG00000203875	387066	SNHG5	small nucleolar RNA host gene 5	1644.79923545681	0.651821126751597	3.01445909866688e-18
ENSG00000182199	6472	SHMT2	serine hydroxymethyltransferase 2	2782.12256135831	0.560702864307453	3.08610342355289e-18
ENSG00000106049	11112	HIBADH	3-hydroxyisobutyrate dehydrogenase	1223.20370122028	-0.649808789434219	3.22718314383969e-18
ENSG00000163507	57650	CIP2A	cell proliferation regulating inhibitor of protein phosphatase 2A	691.929537818297	-0.752469815820584	3.48676167948233e-18
ENSG00000070540	55062	WIPI1	WD repeat domain, phosphoinositide interacting 1	328.755356577574	1.20169346011679	3.7841018954208e-18
ENSG00000110237	9828	ARHGEF17	Rho guanine nucleotide exchange factor 17	664.311304908179	0.878581922244769	3.7873728984936e-18
ENSG00000125944	10236	HNRNPR	heterogeneous nuclear ribonucleoprotein R	3465.89946806847	-0.505055244811049	3.91976797512793e-18
ENSG00000089057	9962	SLC23A2	solute carrier family 23 member 2	3557.12596157582	0.487960311364044	4.02103389935399e-18
ENSG00000225697	65010	SLC26A6	solute carrier family 26 member 6	560.783875532495	0.9922897503373	4.22383797957181e-18
ENSG00000122545	989	SEPTIN7	septin 7	4857.90740687846	-0.468367048250895	4.56590699434856e-18
ENSG00000143774	2987	GUK1	guanylate kinase 1	1107.43533588938	0.684093943229206	4.56590699434856e-18
ENSG00000110958	10728	PTGES3	prostaglandin E synthase 3	4496.83564530723	-0.502966065232322	4.72956116487463e-18
ENSG00000126012	8242	KDM5C	lysine demethylase 5C	2215.94217352431	0.530237085334779	4.891727470355e-18
ENSG00000099821	5442	POLRMT	RNA polymerase mitochondrial	524.870741611214	0.89429427291268	4.97749303863754e-18
ENSG00000119314	9991	PTBP3	polypyrimidine tract binding protein 3	947.946579194917	-0.720285261552187	5.36489596910838e-18
ENSG00000114480	2632	GBE1	1,4-alpha-glucan branching enzyme 1	1037.21626214191	0.688198707135432	5.51168164201975e-18
ENSG00000005007	5976	UPF1	UPF1, RNA helicase and ATPase	1320.19785519932	0.614535273704731	5.51730112997293e-18
ENSG00000182253	23336	SYNM	synemin	5030.52031937532	0.439324664606894	5.58041638961197e-18
ENSG00000111145	2004	ELK3	ELK3, ETS transcription factor	1480.20792588983	-0.640161911098017	5.6403335558076e-18
ENSG00000155368	1622	DBI	diazepam binding inhibitor, acyl-CoA binding protein	1691.03704461332	-0.74110946538275	5.6800205412885e-18
ENSG00000134343	63982	ANO3	anoctamin 3	38.7065097918878	-3.3439178371989	5.70144811132336e-18
ENSG00000178951	51341	ZBTB7A	zinc finger and BTB domain containing 7A	682.566102834942	0.794700019299437	6.00487314746729e-18
ENSG00000133119	5983	RFC3	replication factor C subunit 3	1382.9827744372	-0.630102790816733	6.29164371082371e-18
ENSG00000126461	58506	SCAF1	SR-related CTD associated factor 1	1076.40616468868	0.712301325765267	6.3958320566542e-18
ENSG00000142207	9875	URB1	URB1 ribosome biogenesis 1 homolog (S. cerevisiae)	1110.04943239898	0.655589710315926	6.3958320566542e-18
ENSG00000170915	85315	PAQR8	progestin and adipoQ receptor family member 8	521.055253709029	-0.887202267822071	6.55206445618594e-18
ENSG00000113648	9555	H2AFY	H2A histone family member Y	2695.90420618077	-0.48213064742267	7.01800604798649e-18
ENSG00000122952	11130	ZWINT	ZW10 interacting kinetochore protein	1799.75588624322	-0.540241564557103	7.25158417038463e-18
ENSG00000231290	149773	APCDD1L-DT	APCDD1L divergent transcript	411.151948495311	-0.949524320508945	8.57738057069907e-18
ENSG00000100906	4792	NFKBIA	NFKB inhibitor alpha	251.927399969114	1.33378969023285	8.92251176782751e-18
ENSG00000138650	57575	PCDH10	protocadherin 10	631.170130063077	-0.766120492924055	9.31837207978284e-18
ENSG00000073150	56666	PANX2	pannexin 2	140.265342882526	1.80948659108366	1.24432435120931e-17
ENSG00000122565	11335	CBX3	chromobox 3	6463.8214604633	-0.461311040959476	1.264290453614e-17
ENSG00000124831	9208	LRRFIP1	LRR binding FLII interacting protein 1	1836.0906291596	0.542179867151024	1.29213740575267e-17
ENSG00000160972	84988	PPP1R16A	protein phosphatase 1 regulatory subunit 16A	220.910162390868	1.41900509743894	1.35504736146191e-17
ENSG00000114023	26355	FAM162A	family with sequence similarity 162 member A	289.952870338609	1.30887223460268	1.6894504141116e-17
ENSG00000060982	586	BCAT1	branched chain amino acid transaminase 1	193.73790099957	1.47219790137298	1.78680172768826e-17
ENSG00000166963	4130	MAP1A	microtubule associated protein 1A	1309.49261817786	0.619178309867667	1.81867035286945e-17
ENSG00000068366	2182	ACSL4	acyl-CoA synthetase long chain family member 4	1472.69020133516	-0.567549356051219	2.1517871465771e-17
ENSG00000138459	55032	SLC35A5	solute carrier family 35 member A5	445.722477424545	-0.893154608575834	2.3069081703107e-17
ENSG00000134690	55143	CDCA8	cell division cycle associated 8	834.375881080397	-0.705674462328929	2.34574823653311e-17
ENSG00000008735	23542	MAPK8IP2	mitogen-activated protein kinase 8 interacting protein 2	173.04511746401	1.60295400683233	2.38694865568259e-17
ENSG00000172432	54676	GTPBP2	GTP binding protein 2	834.160511519189	0.84939823231028	2.4845690889924e-17
ENSG00000187325	51616	TAF9B	TATA-box binding protein associated factor 9b	499.198296419606	-0.842935289172272	2.49308293617464e-17
ENSG00000140479	5046	PCSK6	proprotein convertase subtilisin/kexin type 6	121.388881329731	1.96613724094957	2.53740611002275e-17
ENSG00000189057	374393	FAM111B	family with sequence similarity 111 member B	815.958664454324	-0.686474034480097	2.6079485766776e-17
ENSG00000180900	23513	SCRIB	scribbled planar cell polarity protein	1547.76169161386	0.578082583212135	2.69527547410566e-17
ENSG00000116667	81563	C1orf21	chromosome 1 open reading frame 21	1240.09918184609	-0.605543604311769	2.79584009838974e-17
ENSG00000125266	1948	EFNB2	ephrin B2	349.489282217267	-0.981262873573322	2.96845688633688e-17
ENSG00000107984	22943	DKK1	dickkopf WNT signaling pathway inhibitor 1	115.966130330285	-1.65215968899947	3.18075106941036e-17
ENSG00000069849	483	ATP1B3	ATPase Na+/K+ transporting subunit beta 3	2635.58078363778	-0.543785184354975	3.40873259150465e-17
ENSG00000106355	23658	LSM5	LSM5 homolog, U6 small nuclear RNA and mRNA degradation associated	874.863015670429	-0.696272628855912	3.42249849457181e-17
ENSG00000187164	57698	SHTN1	shootin 1	1955.61220240566	0.666487271315435	3.48620888076283e-17
ENSG00000132475	3021	H3F3B	H3 histone family member 3B	13014.10574509	-0.443258060432673	3.55553899941134e-17
ENSG00000185650	677	ZFP36L1	ZFP36 ring finger protein like 1	2146.82437002194	0.601247206628343	3.55553899941134e-17
ENSG00000155959	7411	VBP1	VHL binding protein 1	886.399585839675	-0.736755874832043	3.96290452191126e-17
ENSG00000061337	11178	LZTS1	leucine zipper tumor suppressor 1	1321.49476653379	-0.674445596262978	4.24720593522558e-17
ENSG00000120708	7045	TGFBI	transforming growth factor beta induced	3071.88218664592	-0.518193097519558	4.44139666091809e-17
ENSG00000070950	56852	RAD18	RAD18, E3 ubiquitin protein ligase	750.975121477689	-0.734212006103361	4.71148082383687e-17
ENSG00000071054	9448	MAP4K4	mitogen-activated protein kinase kinase kinase kinase 4	3290.10892830453	-0.474583360177127	5.07479127652572e-17
ENSG00000118242	55686	MREG	melanoregulin	468.674453932832	0.989884188570364	5.90570703334863e-17
ENSG00000148468	221061	FAM171A1	family with sequence similarity 171 member A1	47.2033379577361	-2.77702530676682	6.1029560013427e-17
ENSG00000131626	8500	PPFIA1	PTPRF interacting protein alpha 1	1410.96387007418	0.62375262771043	6.12233249546387e-17
ENSG00000140945	1012	CDH13	cadherin 13	1327.71462258736	-0.596642677072075	6.23555775981645e-17
ENSG00000058804	55706	NDC1	NDC1 transmembrane nucleoporin	1157.43891425431	-0.6073087867517	6.26950192336379e-17
ENSG00000174233	112	ADCY6	adenylate cyclase 6	909.914706412257	0.725821874159418	6.82766757156096e-17
ENSG00000065911	10797	MTHFD2	methylenetetrahydrofolate dehydrogenase (NADP+ dependent) 2, methenyltetrahydrofolate cyclohydrolase	995.939669769157	0.691793790958843	7.13889418550125e-17
ENSG00000150990	57647	DHX37	DEAH-box helicase 37	460.776549637754	0.932401748142153	7.32624176510577e-17
ENSG00000164754	5885	RAD21	RAD21 cohesin complex component	2708.10078827942	-0.514939912755401	7.47106055830013e-17
ENSG00000175931	63893	UBE2O	ubiquitin conjugating enzyme E2 O	1125.91434627558	0.658139059305522	8.21083711458882e-17
ENSG00000153814	221895	JAZF1	JAZF zinc finger 1	335.837264496935	-1.02423759011574	8.31610327276621e-17
ENSG00000004897	996	CDC27	cell division cycle 27	2137.44459120248	-0.51300101982129	8.55944478109276e-17
ENSG00000162522	57648	KIAA1522	KIAA1522	603.320833194072	0.806695332331631	9.55387891511579e-17
ENSG00000134508	91768	CABLES1	Cdk5 and Abl enzyme substrate 1	142.021258904923	1.72662648072466	1.06321311464674e-16
ENSG00000106211	3315	HSPB1	heat shock protein family B (small) member 1	2345.1220838786	0.550513082694882	1.07660712545968e-16
ENSG00000164626	8645	KCNK5	potassium two pore domain channel subfamily K member 5	189.734245247139	-1.28039589788579	1.15523228339161e-16
ENSG00000164620	285613	RELL2	RELT like 2	223.968348340381	1.31450817617009	1.18987522318381e-16
ENSG00000189067	9516	LITAF	lipopolysaccharide induced TNF factor	1295.87830096318	-0.601935533033078	1.21144571686731e-16
ENSG00000182718	302	ANXA2	annexin A2	12769.3411321169	-0.436676988831597	1.32158019843995e-16
ENSG00000100225	25793	FBXO7	F-box protein 7	3726.67193859871	-0.47976105149423	1.36948385679579e-16
ENSG00000176994	140775	SMCR8	Smith-Magenis syndrome chromosome region, candidate 8	746.869957296477	0.7705789685594	1.37969467564866e-16
ENSG00000185359	9146	HGS	hepatocyte growth factor-regulated tyrosine kinase substrate	1983.1013265147	0.542224927839259	1.41132272044817e-16
ENSG00000111321	4055	LTBR	lymphotoxin beta receptor	965.401698015061	0.685139820141051	1.42020458807339e-16
ENSG00000071242	6196	RPS6KA2	ribosomal protein S6 kinase A2	249.313859455493	1.24670005820107	1.44463682012674e-16
ENSG00000253522	107075116	MIR3142HG	MIR3142 host gene	424.137799802012	2.85548366798558	1.48082421859537e-16
ENSG00000169047	3667	IRS1	insulin receptor substrate 1	263.111447359671	1.23860875018836	1.50776616797824e-16
ENSG00000167962	90850	ZNF598	zinc finger protein 598	544.712168976001	0.845680487605457	1.62662507271039e-16
ENSG00000101367	22919	MAPRE1	microtubule associated protein RP/EB family member 1	2932.92619592087	-0.530204788669611	1.65812054299757e-16
ENSG00000172869	1657	DMXL1	Dmx like 1	1411.18131236405	0.640871283293489	1.72534040590272e-16
ENSG00000165915	91252	SLC39A13	solute carrier family 39 member 13	489.657386289439	0.929979091577997	1.72850832709165e-16
ENSG00000171604	51523	CXXC5	CXXC finger protein 5	1112.28316347186	-0.650998603071196	1.75559759765193e-16
ENSG00000259207	3690	ITGB3	integrin subunit beta 3	1143.23325546276	0.613534659530989	1.7638958385266e-16
ENSG00000170759	3799	KIF5B	kinesin family member 5B	4195.86529701451	-0.448031611608303	1.78877514624306e-16
ENSG00000184743	25923	ATL3	atlastin GTPase 3	1667.83102075572	-0.552909924913941	1.78877514624306e-16
ENSG00000117139	10765	KDM5B	lysine demethylase 5B	838.72921854524	0.701868019455955	1.79156573164245e-16
ENSG00000151552	5860	QDPR	quinoid dihydropteridine reductase	481.65292945582	0.910720318439071	1.88237101048111e-16
ENSG00000124333	6845	VAMP7	vesicle associated membrane protein 7	826.115748984073	-0.71356744695637	1.88634949294879e-16
ENSG00000065833	4199	ME1	malic enzyme 1	482.631974474414	0.921439164388837	1.97140834550283e-16
ENSG00000115365	10314	LANCL1	LanC like 1	1983.65292745289	-0.515271121451637	2.02576719345108e-16
ENSG00000046653	2824	GPM6B	glycoprotein M6B	388.233872006148	-0.957325828261285	2.07077244228464e-16
ENSG00000158856	2039	DMTN	dematin actin binding protein	454.156693690676	0.918889468567045	2.08065267723671e-16
ENSG00000158014	7780	SLC30A2	solute carrier family 30 member 2	125.932369382736	-1.61468410287382	2.13886686505954e-16
ENSG00000104142	57617	VPS18	VPS18, CORVET/HOPS core subunit	659.618284832959	0.83317071784692	2.49972598723558e-16
ENSG00000159216	861	RUNX1	runt related transcription factor 1	1230.90120172999	0.637708685593152	2.53519607185897e-16
ENSG00000187134	1645	AKR1C1	aldo-keto reductase family 1 member C1	140.151059554776	-1.4552304373966	2.57623214247187e-16
ENSG00000130813	55337	C19orf66	chromosome 19 open reading frame 66	157.545574336632	1.62542263248773	2.57782768282191e-16
ENSG00000106723	10927	SPIN1	spindlin 1	1009.94118927861	-0.618534180588714	2.88418476344671e-16
ENSG00000070444	4335	MNT	MAX network transcriptional repressor	252.428455917271	1.40881482538521	3.08729221862887e-16
ENSG00000119917	3437	IFIT3	interferon induced protein with tetratricopeptide repeats 3	501.573676491267	1.21611097712931	3.09831457490916e-16
ENSG00000140948	23174	ZCCHC14	zinc finger CCHC-type containing 14	954.382599474496	0.671879409826882	3.11263118446107e-16
ENSG00000166987	114785	MBD6	methyl-CpG binding domain protein 6	833.347748342509	0.875968903953731	3.21186593748938e-16
ENSG00000214655	23053	ZSWIM8	zinc finger SWIM-type containing 8	742.068357640004	0.833649934974131	3.30477027436834e-16
ENSG00000160712	3570	IL6R	interleukin 6 receptor	422.096826700849	0.953380730146131	3.40048808891468e-16
ENSG00000182087	91304	TMEM259	transmembrane protein 259	1010.99403906452	0.681623085054082	3.54690314358531e-16
ENSG00000134321	91543	RSAD2	radical S-adenosyl methionine domain containing 2	66.7824379010151	3.60313065563885	4.11855829781445e-16
ENSG00000120833	8835	SOCS2	suppressor of cytokine signaling 2	263.272255049917	1.18781581401604	4.12744140641179e-16
ENSG00000125148	4502	MT2A	metallothionein 2A	5794.29091019549	-0.561961130414356	4.31287478134344e-16
ENSG00000181381	91351	DDX60L	DExD/H-box 60 like	360.889529974693	1.18400157220121	4.40366255744402e-16
ENSG00000109084	27346	TMEM97	transmembrane protein 97	732.579260304256	-0.731715057228775	4.71220158821377e-16
ENSG00000134291	79022	TMEM106C	transmembrane protein 106C	2458.66426173593	-0.567269477530999	4.73586042802263e-16
ENSG00000152253	57405	SPC25	SPC25, NDC80 kinetochore complex component	510.374444193211	-0.842316517104616	4.7489115364707e-16
ENSG00000104731	54758	KLHDC4	kelch domain containing 4	424.981317923178	1.09804523194596	5.22589892091975e-16
ENSG00000187446	11261	CHP1	calcineurin like EF-hand protein 1	1163.29283787224	-0.600503668302685	5.24773887369381e-16
ENSG00000196576	23654	PLXNB2	plexin B2	2790.20232644858	0.454471550988753	5.28920235959609e-16
ENSG00000122884	5033	P4HA1	prolyl 4-hydroxylase subunit alpha 1	1544.85549410794	0.571142151103756	5.65069366306653e-16
ENSG00000102781	84056	KATNAL1	katanin catalytic subunit A1 like 1	509.476252172974	-0.82311969942537	5.73697683979823e-16
ENSG00000117461	8503	PIK3R3	phosphoinositide-3-kinase regulatory subunit 3	354.233962703431	-0.98108952173561	6.29257222056963e-16
ENSG00000135899	3431	SP110	SP110 nuclear body protein	431.36605933427	0.951159315027823	6.6155523043126e-16
ENSG00000162063	899	CCNF	cyclin F	883.850272256141	-0.656628225131152	7.09300003331764e-16
ENSG00000131370	9467	SH3BP5	SH3 domain binding protein 5	232.429676412491	1.27448223797537	7.30152736827341e-16
ENSG00000006747	85477	SCIN	scinderin	87.3838544628609	-1.87997446248814	7.78046968768333e-16
ENSG00000197283	8831	SYNGAP1	synaptic Ras GTPase activating protein 1	459.953612200346	1.24511689318552	7.78046968768333e-16
ENSG00000121621	81930	KIF18A	kinesin family member 18A	403.645921506972	-0.900292360170042	8.32627150658705e-16
ENSG00000119139	9414	TJP2	tight junction protein 2	729.945154598714	-0.681208786242807	8.49297088218408e-16
ENSG00000104442	55156	ARMC1	armadillo repeat containing 1	721.100076515836	-0.814096403270281	8.58718268796958e-16
ENSG00000170899	2941	GSTA4	glutathione S-transferase alpha 4	214.720437658686	-1.22976199659479	8.89005472399504e-16
ENSG00000130304	376497	SLC27A1	solute carrier family 27 member 1	263.215312419719	1.16746626904222	9.45391700708585e-16
ENSG00000237649	3833	KIFC1	kinesin family member C1	1176.87098474694	-0.600831474263628	9.46584587213231e-16
ENSG00000143621	3608	ILF2	interleukin enhancer binding factor 2	2612.00421735331	-0.52474066949758	9.63065986140447e-16
ENSG00000138801	9061	PAPSS1	3'-phosphoadenosine 5'-phosphosulfate synthase 1	1096.33605556529	-0.595864615630234	1.02357933472239e-15
ENSG00000076108	11176	BAZ2A	bromodomain adjacent to zinc finger domain 2A	1584.51271329924	0.568786481206215	1.1925552822119e-15
ENSG00000121904	114784	CSMD2	CUB and Sushi multiple domains 2	26.7499568539619	-5.43201547955399	1.25239126768975e-15
ENSG00000113161	3156	HMGCR	3-hydroxy-3-methylglutaryl-CoA reductase	5510.28885824691	-0.415798002957116	1.28337119095703e-15
ENSG00000173511	7423	VEGFB	vascular endothelial growth factor B	1445.97593738071	0.594906081562131	1.40769299674401e-15
ENSG00000091129	4897	NRCAM	neuronal cell adhesion molecule	1713.24254605532	-0.518120154304489	1.46265424903084e-15
ENSG00000031698	6301	SARS	seryl-tRNA synthetase	2089.70353320206	0.532800116326128	1.47025193472073e-15
ENSG00000197747	6281	S100A10	S100 calcium binding protein A10	3469.68398839905	-0.506580457611808	1.53417806697099e-15
ENSG00000165417	2957	GTF2A1	general transcription factor IIA subunit 1	750.572234854264	-0.682842885436262	1.5457411793517e-15
ENSG00000173064	283450	HECTD4	HECT domain E3 ubiquitin protein ligase 4	594.739947475266	0.834656256376025	1.71945539188737e-15
ENSG00000107819	81855	SFXN3	sideroflexin 3	1814.10439709705	0.548880775307985	1.74934529900017e-15
ENSG00000240583	358	AQP1	aquaporin 1 (Colton blood group)	445.568217084474	-0.829921334986579	1.8044107138174e-15
ENSG00000138071	10097	ACTR2	ARP2 actin related protein 2 homolog	5188.71256565605	-0.420238547115369	1.89261429031124e-15
ENSG00000132623	63926	ANKEF1	ankyrin repeat and EF-hand domain containing 1	157.396581291707	-1.33768502608906	1.94991708874692e-15
ENSG00000180694	169200	TMEM64	transmembrane protein 64	742.149006709871	-0.774234352324419	2.15366575202721e-15
ENSG00000146670	113130	CDCA5	cell division cycle associated 5	1664.93948469039	-0.533112677769446	2.44446824857186e-15
ENSG00000157557	2114	ETS2	ETS proto-oncogene 2, transcription factor	450.483455536315	-0.85224152993497	2.5265857060415e-15
ENSG00000070831	998	CDC42	cell division cycle 42	1830.84237529665	-0.554220742580492	2.54618604710171e-15
ENSG00000115457	3485	IGFBP2	insulin like growth factor binding protein 2	632.4212229451	0.787070506936325	2.84400447044223e-15
ENSG00000163399	476	ATP1A1	ATPase Na+/K+ transporting subunit alpha 1	21132.4117208812	0.352788569679662	3.23242748116938e-15
ENSG00000163453	3490	IGFBP7	insulin like growth factor binding protein 7	1161.35943009765	0.710294657816031	3.44659576967663e-15
ENSG00000123560	5354	PLP1	proteolipid protein 1	3238.70261824384	-0.481979480407246	3.60960389980613e-15
ENSG00000145632	10769	PLK2	polo like kinase 2	2264.02827371966	-0.472993332497075	3.77230523662704e-15
ENSG00000105245	9253	NUMBL	NUMB like, endocytic adaptor protein	252.28458134094	1.17685778490435	3.95191982106227e-15
ENSG00000172716	91607	SLFN11	schlafen family member 11	59.5066613060266	4.00358808159267	4.01395744115629e-15
ENSG00000162836	51205	ACP6	acid phosphatase 6, lysophosphatidic	699.248639112877	-0.706815453777797	4.41699113792652e-15
ENSG00000130762	27237	ARHGEF16	Rho guanine nucleotide exchange factor 16	72.5133423681814	-1.96930894813207	4.48172429352067e-15
ENSG00000050344	9603	NFE2L3	nuclear factor, erythroid 2 like 3	625.133617789762	-0.716974017769715	4.55621353140026e-15
ENSG00000102580	5611	DNAJC3	DnaJ heat shock protein family (Hsp40) member C3	1224.6447737073	-0.58980109013697	4.69519110493177e-15
ENSG00000149212	143686	SESN3	sestrin 3	547.938474625669	-0.760684948176313	4.74345979475028e-15
ENSG00000059378	64761	PARP12	poly(ADP-ribose) polymerase family member 12	300.813110995429	1.16319641942934	4.784544447796e-15
ENSG00000187961	339451	KLHL17	kelch like family member 17	220.278572360423	1.43357472135619	4.81291782932761e-15
ENSG00000133026	4628	MYH10	myosin heavy chain 10	3851.41838506444	-0.430667695995938	4.8452861858992e-15
ENSG00000065534	4638	MYLK	myosin light chain kinase	207.799037646818	-1.17213916815332	4.94800902372942e-15
ENSG00000147155	10682	EBP	emopamil binding protein (sterol isomerase)	455.388041309306	-0.85818017971497	4.94800902372942e-15
ENSG00000164106	11341	SCRG1	stimulator of chondrogenesis 1	204.409852396787	-1.24500231044829	5.01604373098786e-15
ENSG00000198959	7052	TGM2	transglutaminase 2	351.770263118028	0.999592581029472	5.01604373098786e-15
ENSG00000197980	389170	LEKR1	leucine, glutamate and lysine rich 1	41.966895466556	-2.82684553098147	5.2451246745918e-15
ENSG00000115325	1796	DOK1	docking protein 1	629.354565443963	0.83431961885686	5.33547792996078e-15
ENSG00000162889	9261	MAPKAPK2	mitogen-activated protein kinase-activated protein kinase 2	1426.21117227543	0.570291404972923	5.42260907167949e-15
ENSG00000090861	16	AARS	alanyl-tRNA synthetase	3156.80497069926	0.456755783071996	5.45084365667303e-15
ENSG00000137497	4926	NUMA1	nuclear mitotic apparatus protein 1	1821.56698840902	0.556350534914573	5.57423102589851e-15
ENSG00000159433	57519	STARD9	StAR related lipid transfer domain containing 9	372.924921511838	1.23612241598024	5.77196948366721e-15
ENSG00000061273	51564	HDAC7	histone deacetylase 7	370.250805597028	1.00984906380214	6.69930267508494e-15
ENSG00000123992	23549	DNPEP	aspartyl aminopeptidase	739.155820134453	0.694497615320715	6.70236507971302e-15
ENSG00000114923	6508	SLC4A3	solute carrier family 4 member 3	525.777539204073	1.01009712820471	6.73453942235803e-15
ENSG00000148700	120	ADD3	adducin 3	2197.82263905634	-0.473325233495569	6.73582820332169e-15
ENSG00000103489	64131	XYLT1	xylosyltransferase 1	218.197824106679	1.25109562313391	6.84139663739734e-15
ENSG00000272333	9757	KMT2B	lysine methyltransferase 2B	628.068226087275	0.883675736869178	6.85597121171646e-15
ENSG00000197226	23061	TBC1D9B	TBC1 domain family member 9B	1728.67514749736	0.518387497283109	6.93729037993147e-15
ENSG00000172349	3603	IL16	interleukin 16	838.411397135829	0.787306721573398	6.96353002992805e-15
ENSG00000064652	28966	SNX24	sorting nexin 24	722.357933395161	-0.682457556549293	7.01966952961339e-15
ENSG00000247095	100506211	MIR210HG	MIR210 host gene	95.8502007854459	2.24026093170346	7.07975786494977e-15
ENSG00000171310	50515	CHST11	carbohydrate sulfotransferase 11	843.22361343358	0.677094658323886	7.18118665458631e-15
ENSG00000198825	22876	INPP5F	inositol polyphosphate-5-phosphatase F	3707.64786603344	-0.418235527549139	7.32203542226e-15
ENSG00000187954	50626	CYHR1	cysteine and histidine rich 1	473.963687073169	0.891655756460104	7.35143627542769e-15
ENSG00000101347	25939	SAMHD1	SAM and HD domain containing deoxynucleoside triphosphate triphosphohydrolase 1	681.419056379416	1.00269552657296	7.546750920696e-15
ENSG00000092201	11198	SUPT16H	SPT16 homolog, facilitates chromatin remodeling subunit	2659.5909654757	-0.435222302054516	7.64700506572976e-15
ENSG00000123975	1164	CKS2	CDC28 protein kinase regulatory subunit 2	587.668267647657	-0.738748728931609	8.31585071116079e-15
ENSG00000143799	142	PARP1	poly(ADP-ribose) polymerase 1	3395.78660860459	-0.433101725898234	8.37755782127058e-15
ENSG00000150687	11098	PRSS23	serine protease 23	4256.01600413618	-0.488822459355343	8.47662629909364e-15
ENSG00000138180	55165	CEP55	centrosomal protein 55	1184.3013740611	-0.585515395057011	8.72973593705442e-15
ENSG00000169554	9839	ZEB2	zinc finger E-box binding homeobox 2	1539.14185889468	0.533731747408962	8.9478939292027e-15
ENSG00000079246	7520	XRCC5	X-ray repair cross complementing 5	7049.42235374025	-0.372057755347987	9.45160594526698e-15
ENSG00000119986	60370	AVPI1	arginine vasopressin induced 1	207.459627364642	1.29406600785291	9.66219990248742e-15
ENSG00000143847	8497	PPFIA4	PTPRF interacting protein alpha 4	406.861981857499	2.84933485769334	9.84069463296269e-15
ENSG00000114999	150465	TTL	tubulin tyrosine ligase	1343.43474039117	-0.533090023058597	9.86890712226066e-15
ENSG00000177731	2314	FLII	FLII, actin remodeling protein	1307.35293071386	0.564023387094092	9.88005438730347e-15
ENSG00000188906	120892	LRRK2	leucine rich repeat kinase 2	642.201229358217	-0.756967498202575	9.88005438730347e-15
ENSG00000185305	54622	ARL15	ADP ribosylation factor like GTPase 15	226.361361731116	-1.14320563917605	1.0169310317956e-14
ENSG00000155760	8324	FZD7	frizzled class receptor 7	1478.90698816053	-0.569280165859064	1.02877199940159e-14
ENSG00000067066	6672	SP100	SP100 nuclear antigen	677.423931572856	0.777694250770024	1.06565504250814e-14
ENSG00000188549	388115	CCDC9B	coiled-coil domain containing 9B	897.486237560973	0.928860721231494	1.08017260375517e-14
ENSG00000197930	30001	ERO1A	endoplasmic reticulum oxidoreductase 1 alpha	1497.72608622043	0.590481310486917	1.08520864197953e-14
ENSG00000160179	9619	ABCG1	ATP binding cassette subfamily G member 1	29.892199833436	-3.54534460657947	1.09773744932501e-14
ENSG00000166925	81628	TSC22D4	TSC22 domain family member 4	938.761415308093	0.653263433185453	1.10004078461511e-14
ENSG00000127948	5447	POR	cytochrome p450 oxidoreductase	950.976224011577	0.697139613636763	1.13443121671595e-14
ENSG00000074800	2023	ENO1	enolase 1	23704.1444109267	0.392037884338843	1.15889898130989e-14
ENSG00000198176	7027	TFDP1	transcription factor Dp-1	1184.80692511493	-0.584268172148139	1.19969152770227e-14
ENSG00000162704	10092	ARPC5	actin related protein 2/3 complex subunit 5	2881.03683309305	-0.510084609224282	1.2114345101779e-14
ENSG00000213626	81606	LBH	limb bud and heart development	317.269696125015	1.05629670498692	1.21659515569547e-14
ENSG00000172667	64393	ZMAT3	zinc finger matrin-type 3	737.834288267536	-0.680945247191092	1.23233076680247e-14
ENSG00000163873	2899	GRIK3	glutamate ionotropic receptor kainate type subunit 3	36.9595784394198	-7.13607193720468	1.31543195643693e-14
ENSG00000102554	688	KLF5	Kruppel like factor 5	171.568757276737	1.4146343622856	1.33695777767459e-14
ENSG00000167191	51704	GPRC5B	G protein-coupled receptor class C group 5 member B	419.303348527881	0.939895238327749	1.43507961950259e-14
ENSG00000172757	1072	CFL1	cofilin 1	10269.5067059714	-0.412326264260859	1.4372756176507e-14
ENSG00000034152	5606	MAP2K3	mitogen-activated protein kinase kinase 3	1079.39496366636	0.59355247890908	1.46113442290523e-14
ENSG00000116285	54206	ERRFI1	ERBB receptor feedback inhibitor 1	458.977152167416	-0.88120233933882	1.4700853047907e-14
ENSG00000151491	2059	EPS8	epidermal growth factor receptor pathway substrate 8	1379.25559315476	0.556214207385518	1.5015685733654e-14
ENSG00000183258	51428	DDX41	DEAD-box helicase 41	818.635729290812	0.692681426190427	1.52302629784302e-14
ENSG00000108771	79132	DHX58	DExH-box helicase 58	150.174602836932	1.65113803397094	1.53541127445422e-14
ENSG00000135926	64114	TMBIM1	transmembrane BAX inhibitor motif containing 1	1076.3507557794	0.623728016133888	1.5921199346596e-14
ENSG00000181523	6448	SGSH	N-sulfoglucosamine sulfohydrolase	733.703500614642	0.736442282270113	1.63183959332686e-14
ENSG00000135245	29923	HILPDA	hypoxia inducible lipid droplet associated	219.041733677933	1.27164112077942	1.64461880600441e-14
ENSG00000071859	9130	FAM50A	family with sequence similarity 50 member A	1047.89169168026	0.607791504045034	1.67666057575701e-14
ENSG00000101384	182	JAG1	jagged 1	486.122337515232	0.82917072271501	1.71147530387477e-14
ENSG00000134186	55119	PRPF38B	pre-mRNA processing factor 38B	789.132114808389	0.83609037855633	1.7735804650893e-14
ENSG00000160131	203547	VMA21	VMA21, vacuolar ATPase assembly factor	702.162455877501	-0.705825964271	1.82847821147988e-14
ENSG00000128789	56984	PSMG2	proteasome assembly chaperone 2	460.483148223257	-0.841139287757609	1.87550029848614e-14
ENSG00000182551	55256	ADI1	acireductone dioxygenase 1	1159.30907179086	-0.585957307034124	1.90371585761321e-14
ENSG00000109814	7358	UGDH	UDP-glucose 6-dehydrogenase	646.219928975749	-0.722051309762429	1.96615553166051e-14
ENSG00000139278	11010	GLIPR1	GLI pathogenesis related 1	127.163284546093	-1.41611798920158	1.97409413175793e-14
ENSG00000116337	271	AMPD2	adenosine monophosphate deaminase 2	760.756527986213	0.692450598715429	1.9898657322609e-14
ENSG00000188229	10383	TUBB4B	tubulin beta 4B class IVb	5507.09752403429	-0.461131895096386	2.29295231054262e-14
ENSG00000163840	151636	DTX3L	deltex E3 ubiquitin ligase 3L	479.939232040614	0.960098970614359	2.30152426530384e-14
ENSG00000129048	51554	ACKR4	atypical chemokine receptor 4	124.810887972341	-1.48424164862122	2.34922765942276e-14
ENSG00000181458	55076	TMEM45A	transmembrane protein 45A	202.771314313477	1.31058765268067	2.44198640052216e-14
ENSG00000182150	375748	ERCC6L2	ERCC excision repair 6 like 2	416.984089911065	-0.830466090915654	2.6651841396327e-14
ENSG00000099875	2872	MKNK2	MAP kinase interacting serine/threonine kinase 2	484.326641362738	0.868489180054072	2.6795541251768e-14
ENSG00000160796	23218	NBEAL2	neurobeachin like 2	264.559791238049	1.24031901102852	2.68197891205295e-14
ENSG00000111206	2305	FOXM1	forkhead box M1	2292.44734964413	-0.458289261169443	2.69323955711586e-14
ENSG00000140464	5371	PML	promyelocytic leukemia	874.589625857195	0.660790392173999	2.69445694208879e-14
ENSG00000125885	84515	MCM8	minichromosome maintenance 8 homologous recombination repair factor	1937.55345716212	-0.471586092854926	2.71599196681631e-14
ENSG00000099625	255057	CBARP	CACN beta subunit associated regulatory protein	154.345930635794	1.47542800533045	2.8369504489706e-14
ENSG00000183044	18	ABAT	4-aminobutyrate aminotransferase	186.862152950989	-1.17251417023663	2.91542832023994e-14
ENSG00000123485	55355	HJURP	Holliday junction recognition protein	1925.59396220048	-0.486388917227221	2.93214263216536e-14
ENSG00000178814	26873	OPLAH	5-oxoprolinase, ATP-hydrolysing	188.055677774824	1.32995758151878	3.10406327734003e-14
ENSG00000102359	27286	SRPX2	sushi repeat containing protein, X-linked 2	128.343578071883	-1.42532962551657	3.18365196655424e-14
ENSG00000040275	54908	SPDL1	spindle apparatus coiled-coil protein 1	503.480656843371	-0.755088766399006	3.19887062998713e-14
ENSG00000129173	79733	E2F8	E2F transcription factor 8	525.009742642714	-0.770534887964665	3.19887062998713e-14
ENSG00000092853	63967	CLSPN	claspin	665.288235716472	-0.667581769420138	3.47840572277277e-14
ENSG00000198830	3151	HMGN2	high mobility group nucleosomal binding domain 2	3169.79046657072	-0.444923370739876	3.56488818658249e-14
ENSG00000163785	6259	RYK	receptor-like tyrosine kinase	653.828094587493	-0.757172168513095	3.62227451577511e-14
ENSG00000068654	25885	POLR1A	RNA polymerase I subunit A	1363.87216509268	0.56347206359871	3.6508939663162e-14
ENSG00000136240	11014	KDELR2	KDEL endoplasmic reticulum protein retention receptor 2	4253.09956375328	-0.398348960947641	3.77278339455047e-14
ENSG00000134294	54407	SLC38A2	solute carrier family 38 member 2	5165.52424789279	-0.367037679715113	3.84078000481829e-14
ENSG00000244242	402778	IFITM10	interferon induced transmembrane protein 10	83.0096975566918	2.48019898561368	3.84867854221178e-14
ENSG00000147852	7436	VLDLR	very low density lipoprotein receptor	364.823281417278	0.955248031964252	3.95402442150228e-14
ENSG00000125826	10616	RBCK1	RANBP2-type and C3HC4-type zinc finger containing 1	1083.14173995804	0.591990411702569	4.03865123352936e-14
ENSG00000196419	2547	XRCC6	X-ray repair cross complementing 6	5261.35462765111	-0.401016688017055	4.32332578833448e-14
ENSG00000143842	9580	SOX13	SRY-box 13	152.939227608748	-1.3186955856386	4.48062057544966e-14
ENSG00000116017	1820	ARID3A	AT-rich interaction domain 3A	157.997881579115	1.4315675290823	4.52395597665084e-14
ENSG00000133318	10313	RTN3	reticulon 3	2161.80898866123	-0.473433780804161	4.52395597665084e-14
ENSG00000180902	728294	D2HGDH	D-2-hydroxyglutarate dehydrogenase	455.187272242328	0.925253792473711	4.52395597665084e-14
ENSG00000110917	9761	MLEC	malectin	4725.73462001794	-0.428144876999945	4.70564055806654e-14
ENSG00000136869	7099	TLR4	toll like receptor 4	347.039133903246	-0.965174207091498	5.10360110081941e-14
ENSG00000189091	23450	SF3B3	splicing factor 3b subunit 3	3000.32907932324	-0.421942608064255	5.46897334082336e-14
ENSG00000105321	26093	CCDC9	coiled-coil domain containing 9	216.566601097714	1.22883591739192	5.47634333602031e-14
ENSG00000148843	22984	PDCD11	programmed cell death 11	833.401951833077	0.688840529820811	5.48013788710712e-14
ENSG00000152904	9453	GGPS1	geranylgeranyl diphosphate synthase 1	381.483435022311	-0.859630803724886	5.86132135563538e-14
ENSG00000149823	738	VPS51	VPS51, GARP complex subunit	821.695026710398	0.68297494707163	5.89240247253194e-14
ENSG00000117650	4751	NEK2	NIMA related kinase 2	570.157004979876	-0.746300334410225	6.00721633751855e-14
ENSG00000106665	7461	CLIP2	CAP-Gly domain containing linker protein 2	613.012661945069	0.754048811316379	6.11736024085834e-14
ENSG00000127054	54973	INTS11	integrator complex subunit 11	775.757641850152	0.71875850280216	6.52164085602103e-14
ENSG00000131437	11127	KIF3A	kinesin family member 3A	674.951100759919	-0.676733804878249	6.80287993323489e-14
ENSG00000104852	6625	SNRNP70	small nuclear ribonucleoprotein U1 subunit 70	2541.87469714385	0.596489052827591	6.85511313729144e-14
ENSG00000006459	80853	KDM7A	lysine demethylase 7A	255.836300890629	1.11458451288819	7.24235337753032e-14
ENSG00000100526	1033	CDKN3	cyclin dependent kinase inhibitor 3	510.65526827911	-0.744580534093455	7.32019542635379e-14
ENSG00000213853	2013	EMP2	epithelial membrane protein 2	1442.13477390465	-0.505420565701369	7.49168525584572e-14
ENSG00000123892	23682	RAB38	RAB38, member RAS oncogene family	147.283670532261	1.51547593842999	7.69695770008523e-14
ENSG00000171621	80176	SPSB1	splA/ryanodine receptor domain and SOCS box containing 1	230.576576531133	1.20283119049458	7.7379974794032e-14
ENSG00000099899	27037	TRMT2A	tRNA methyltransferase 2 homolog A	633.217398333222	0.721909752738816	7.82920177751956e-14
ENSG00000114450	59345	GNB4	G protein subunit beta 4	1293.41882225909	-0.594744604614222	7.82920177751956e-14
ENSG00000197702	55742	PARVA	parvin alpha	1074.73864350787	-0.55817535144054	7.82920177751956e-14
ENSG00000136875	9128	PRPF4	pre-mRNA processing factor 4	761.471300926775	-0.648354737131236	8.15636269096853e-14
ENSG00000114867	1981	EIF4G1	eukaryotic translation initiation factor 4 gamma 1	5830.27025902288	0.367320741015628	8.43157415041558e-14
ENSG00000116237	23463	ICMT	isoprenylcysteine carboxyl methyltransferase	2226.92166687956	-0.501334063782112	8.48046983095859e-14
ENSG00000187546	392636	AGMO	alkylglycerol monooxygenase	78.4929824100042	-1.94548540711932	8.50502510348989e-14
ENSG00000127616	6597	SMARCA4	SWI/SNF related, matrix associated, actin dependent regulator of chromatin, subfamily a, member 4	1709.06577670085	0.498115349478853	8.68028106958491e-14
ENSG00000050438	9498	SLC4A8	solute carrier family 4 member 8	81.2997956026686	-1.73556239543021	8.80510696486093e-14
ENSG00000110321	1982	EIF4G2	eukaryotic translation initiation factor 4 gamma 2	13086.4344336854	-0.338428467005657	9.41357652678088e-14
ENSG00000198728	8861	LDB1	LIM domain binding 1	624.311464826187	0.769334534977447	9.61453455101255e-14
ENSG00000160932	4061	LY6E	lymphocyte antigen 6 family member E	2563.27719636821	0.533364798801338	9.62395039597614e-14
ENSG00000130921	91574	C12orf65	chromosome 12 open reading frame 65	553.789051348674	-0.719466697459552	9.70130019490257e-14
ENSG00000185760	56479	KCNQ5	potassium voltage-gated channel subfamily Q member 5	76.3468425365556	2.38336132409922	9.75270232644258e-14
ENSG00000172086	51315	KRCC1	lysine rich coiled-coil 1	367.300321584564	-0.845705219977191	9.81401501441964e-14
ENSG00000114738	7867	MAPKAPK3	mitogen-activated protein kinase-activated protein kinase 3	282.857911705886	1.08652049643573	9.94555181307764e-14
ENSG00000079616	3835	KIF22	kinesin family member 22	989.510054399234	-0.568769535463784	1.02877379090081e-13
ENSG00000235162	387882	C12orf75	chromosome 12 open reading frame 75	882.015476189609	-0.610746935171138	1.04988678051194e-13
ENSG00000111335	4939	OAS2	2'-5'-oligoadenylate synthetase 2	69.4566550056479	2.90543376856705	1.05172327380335e-13
ENSG00000131759	5914	RARA	retinoic acid receptor alpha	449.494166703972	0.853511984951462	1.09341436602966e-13
ENSG00000136937	4686	NCBP1	nuclear cap binding protein subunit 1	805.388022092989	-0.627117312253684	1.12848653912199e-13
ENSG00000149541	26229	B3GAT3	beta-1,3-glucuronyltransferase 3	592.225358295528	0.727338906158588	1.13365658771267e-13
ENSG00000108100	219771	CCNY	cyclin Y	846.261614095025	-0.645022922456781	1.19120511470049e-13
ENSG00000149557	9638	FEZ1	fasciculation and elongation protein zeta 1	693.288567423624	-0.75061732432027	1.19725003289707e-13
ENSG00000160256	85395	FAM207A	family with sequence similarity 207 member A	178.525286401191	1.38847048433019	1.21145552309148e-13
ENSG00000164741	10395	DLC1	DLC1 Rho GTPase activating protein	417.175377151378	0.853911497240695	1.26845458489472e-13
ENSG00000136997	4609	MYC	MYC proto-oncogene, bHLH transcription factor	689.3402284516	0.687548496040881	1.27428547690359e-13
ENSG00000133704	10526	IPO8	importin 8	1227.40256697786	-0.533574243627366	1.32199723173514e-13
ENSG00000151348	2132	EXT2	exostosin glycosyltransferase 2	3385.5601688037	-0.470866607697232	1.34237765948617e-13
ENSG00000150457	26524	LATS2	large tumor suppressor kinase 2	316.497773766284	0.975807821648782	1.36312793912259e-13
ENSG00000170017	214	ALCAM	activated leukocyte cell adhesion molecule	1568.82484525338	0.504766941928432	1.36312793912259e-13
ENSG00000215908	84809	CROCCP2	ciliary rootlet coiled-coil, rootletin pseudogene 2	269.466671669601	1.24805109235582	1.42811265483694e-13
ENSG00000162521	5928	RBBP4	RB binding protein 4, chromatin remodeling factor	2051.55006067637	-0.461008318795501	1.4453189632413e-13
ENSG00000169604	84168	ANTXR1	anthrax toxin receptor 1	1276.53165344569	0.575205948584091	1.45043344584122e-13
ENSG00000169851	5099	PCDH7	protocadherin 7	1948.35414876866	0.487920098713352	1.51486623023125e-13
ENSG00000119950	4601	MXI1	MAX interactor 1, dimerization protein	826.077952307039	0.687580912005637	1.54273549424062e-13
ENSG00000160710	103	ADAR	adenosine deaminase, RNA specific	5105.8579927023	0.411512480981637	1.5745252911263e-13
ENSG00000107104	23189	KANK1	KN motif and ankyrin repeat domains 1	1361.44925796938	0.531859741740915	1.58842985674609e-13
ENSG00000160949	4796	TONSL	tonsoku like, DNA repair protein	745.403366401035	0.73149656270217	1.61186967957663e-13
ENSG00000174839	201627	DENND6A	DENN domain containing 6A	587.158166636316	-0.687565992111938	1.71469432162735e-13
ENSG00000188191	5575	PRKAR1B	protein kinase cAMP-dependent type I regulatory subunit beta	748.168205383352	0.726247471338743	1.72159478517032e-13
ENSG00000116128	607	BCL9	B cell CLL/lymphoma 9	1444.54327261573	-0.522497269499197	1.73813848362929e-13
ENSG00000177628	2629	GBA	glucosylceramidase beta	1337.29286758174	0.553756753420155	1.7401663155423e-13
ENSG00000162664	284695	ZNF326	zinc finger protein 326	691.383791324555	-0.647239681998358	1.7538677297149e-13
ENSG00000198420	9747	TCAF1	TRPM8 channel associated factor 1	737.673520045425	-0.653119452237681	1.80595940428933e-13
ENSG00000108518	5216	PFN1	profilin 1	5405.19252416814	-0.436333265960344	1.84343882293782e-13
ENSG00000158716	54935	DUSP23	dual specificity phosphatase 23	248.828092469542	1.14402014888082	2.01076844546829e-13
ENSG00000076382	10615	SPAG5	sperm associated antigen 5	1208.48944992514	-0.528927284008635	2.05570312939398e-13
ENSG00000184226	5101	PCDH9	protocadherin 9	644.316107372471	-0.693911817246628	2.41568753978945e-13
ENSG00000179104	160335	TMTC2	transmembrane and tetratricopeptide repeat containing 2	1322.04854102582	-0.551267035250616	2.52585867522401e-13
ENSG00000188211	374383	NCR3LG1	natural killer cell cytotoxicity receptor 3 ligand 1	126.356799222212	1.66137448826506	2.52898378913245e-13
ENSG00000142949	5792	PTPRF	protein tyrosine phosphatase, receptor type F	1631.94348109521	0.509739316388028	2.53986771831223e-13
ENSG00000251493	2297	FOXD1	forkhead box D1	433.443457826261	0.842962443908282	2.62098456056503e-13
ENSG00000058453	9696	CROCC	ciliary rootlet coiled-coil, rootletin	172.441517931937	1.44387824358807	2.63972003776667e-13
ENSG00000140525	55215	FANCI	Fanconi anemia complementation group I	2101.1799030927	-0.446278181417752	2.66788928932056e-13
ENSG00000134758	51444	RNF138	ring finger protein 138	482.933026535019	-0.77994909565387	2.76939855760392e-13
ENSG00000198431	7296	TXNRD1	thioredoxin reductase 1	4625.45549048404	0.426676266381243	2.93158479886094e-13
ENSG00000011422	5329	PLAUR	plasminogen activator, urokinase receptor	458.920979256567	-0.788963627982299	2.98408728572026e-13
ENSG00000140853	84166	NLRC5	NLR family CARD domain containing 5	164.350181914082	1.40193441605045	3.25342062587201e-13
ENSG00000042286	84883	AIFM2	apoptosis inducing factor, mitochondria associated 2	412.19995824924	0.874833178754571	3.26882651939836e-13
ENSG00000140995	54849	DEF8	differentially expressed in FDCP 8 homolog	1077.42405811323	0.562383107163375	3.34419565336513e-13
ENSG00000166851	5347	PLK1	polo like kinase 1	1385.82221268663	-0.542660083779804	3.3833704712071e-13
ENSG00000099331	4650	MYO9B	myosin IXB	1363.44438089516	0.537795334825138	3.45545268047762e-13
ENSG00000173848	10276	NET1	neuroepithelial cell transforming 1	406.079995227453	-0.795686461453373	3.45708470102405e-13
ENSG00000173705	26032	SUSD5	sushi domain containing 5	708.00626475831	-0.654995745242543	3.8147264768255e-13
ENSG00000159063	79053	ALG8	ALG8, alpha-1,3-glucosyltransferase	1441.81961100278	-0.506638027649148	3.92820842724458e-13
ENSG00000165322	94134	ARHGAP12	Rho GTPase activating protein 12	853.993683271382	-0.606373735722227	4.00632566476472e-13
ENSG00000129636	81533	ITFG1	integrin alpha FG-GAP repeat containing 1	939.380863686621	-0.574086705750942	4.15999994663334e-13
ENSG00000124145	6385	SDC4	syndecan 4	1385.29875451654	-0.542642650514301	4.26830370252091e-13
ENSG00000148680	3363	HTR7	5-hydroxytryptamine receptor 7	128.733905889849	-1.37666374510487	4.38563401728561e-13
ENSG00000235587	389849	GAPDHP65	Glyceraldehyde 3 Phosphate Dehydrogenase Pseudogene 65	78.8313092879825	2.17693951292837	4.5023116611824e-13
ENSG00000111247	10635	RAD51AP1	RAD51 associated protein 1	500.272174560784	-0.7374389137608	4.83167087919664e-13
ENSG00000148516	6935	ZEB1	zinc finger E-box binding homeobox 1	613.878151172947	-0.669666813414067	4.99102526298385e-13
ENSG00000106546	196	AHR	aryl hydrocarbon receptor	1256.66110373837	-0.542233705367649	5.12093995712567e-13
ENSG00000114757	51555	PEX5L	peroxisomal biogenesis factor 5 like	137.953115362108	-1.41261668458625	5.18087514789121e-13
ENSG00000162298	84447	SYVN1	synoviolin 1	797.513460989595	0.642913983495406	5.37232810126132e-13
ENSG00000055483	57602	USP36	ubiquitin specific peptidase 36	1431.30519402989	0.656636192006724	5.44961363226029e-13
ENSG00000139718	23067	SETD1B	SET domain containing 1B	371.432295358704	0.946743585102425	5.47064029495326e-13
ENSG00000141522	396	ARHGDIA	Rho GDP dissociation inhibitor alpha	4314.07932934727	0.440197787997822	5.88980212904135e-13
ENSG00000006652	3475	IFRD1	interferon related developmental regulator 1	882.862518864716	0.604183409530603	6.30790892620456e-13
ENSG00000169718	64118	DUS1L	dihydrouridine synthase 1 like	1558.0167289258	0.48692935431687	6.3251613552815e-13
ENSG00000065328	55388	MCM10	minichromosome maintenance 10 replication initiation factor	537.720171157443	-0.713676333177841	6.41312995543893e-13
ENSG00000165475	51084	CRYL1	crystallin lambda 1	355.801625016219	-0.839005528390314	6.46379176324462e-13
ENSG00000165119	3190	HNRNPK	heterogeneous nuclear ribonucleoprotein K	6557.61427698975	-0.376634087203	6.47754215903518e-13
ENSG00000143507	11221	DUSP10	dual specificity phosphatase 10	404.787254970928	0.841810133954296	6.64803189313644e-13
ENSG00000152767	10160	FARP1	FERM, ARH/RhoGEF and pleckstrin domain protein 1	514.186509236163	-0.707050870142475	6.76518131606525e-13
ENSG00000243156	57553	MICAL3	microtubule associated monooxygenase, calponin and LIM domain containing 3	1482.05265465494	0.555452434781924	6.76518131606525e-13
ENSG00000145901	10318	TNIP1	TNFAIP3 interacting protein 1	589.357011242264	0.748715560610985	7.33408362558251e-13
ENSG00000121152	23397	NCAPH	non-SMC condensin I complex subunit H	972.181588746856	-0.553952272398872	7.35610099169384e-13
ENSG00000156515	3098	HK1	hexokinase 1	3159.37258549102	0.427998341237257	7.48262683318208e-13
ENSG00000163820	79443	FYCO1	FYVE and coiled-coil domain containing 1	517.966556643127	0.74997012254699	7.68019535673426e-13
ENSG00000106829	7091	TLE4	transducin like enhancer of split 4	403.998687584105	-0.787559611625159	7.8363502023333e-13
ENSG00000156136	1633	DCK	deoxycytidine kinase	609.333298030022	-0.659799199403169	7.92036385438518e-13
ENSG00000157637	124565	SLC38A10	solute carrier family 38 member 10	2267.79431188551	0.454612967796439	8.21439646842022e-13
ENSG00000158805	92822	ZNF276	zinc finger protein 276	186.554542660694	1.45280085874946	8.43456125209306e-13
ENSG00000135018	29979	UBQLN1	ubiquilin 1	2305.38135300731	-0.436814670038394	8.45549940039944e-13
ENSG00000102024	5358	PLS3	plastin 3	2018.72059054536	-0.509239053810085	8.51129016439067e-13
ENSG00000169871	81844	TRIM56	tripartite motif containing 56	1022.33192252599	0.627293008160197	8.71613444059148e-13
ENSG00000106688	6505	SLC1A1	solute carrier family 1 member 1	343.57952271213	-0.86654935062899	8.82701511851647e-13
ENSG00000074855	57719	ANO8	anoctamin 8	230.284339533386	1.13434867558711	8.9762116469974e-13
ENSG00000196139	8644	AKR1C3	aldo-keto reductase family 1 member C3	72.1130638778795	-1.87584977084923	9.04611843169288e-13
ENSG00000156475	5521	PPP2R2B	protein phosphatase 2 regulatory subunit Bbeta	75.4467174439829	-1.74531314283455	9.18861074171736e-13
ENSG00000176533	2788	GNG7	G protein subunit gamma 7	578.527419657466	-0.698351371671899	9.23404364779282e-13
ENSG00000175505	23529	CLCF1	cardiotrophin like cytokine factor 1	116.176727244293	1.71505768568166	9.24123452264783e-13
ENSG00000189043	4697	NDUFA4	NDUFA4, mitochondrial complex associated	2081.35363970738	-0.477518055144934	9.31613087045576e-13
ENSG00000075945	22920	KIFAP3	kinesin associated protein 3	871.091461460515	-0.639890075910189	9.910355663647e-13
ENSG00000132382	10514	MYBBP1A	MYB binding protein 1a	860.706274609172	0.647319035965065	1.03280996170599e-12
ENSG00000163013	150726	FBXO41	F-box protein 41	289.024715838472	1.05045850453389	1.06631922747736e-12
ENSG00000134440	4677	NARS	asparaginyl-tRNA synthetase	3058.47802409796	0.411291841747021	1.06698259333008e-12
ENSG00000151892	2674	GFRA1	GDNF family receptor alpha 1	1484.42289710768	-0.472955055118156	1.07552612783371e-12
ENSG00000141582	8535	CBX4	chromobox 4	930.657286947568	0.608148082507812	1.08671441936992e-12
ENSG00000035687	159	ADSS	adenylosuccinate synthase	950.883687090602	-0.584553338093632	1.0903728580664e-12
ENSG00000106785	9830	TRIM14	tripartite motif containing 14	554.887580493627	0.824855658303031	1.0903728580664e-12
ENSG00000134030	9811	CTIF	cap binding complex dependent translation initiation factor	285.862752598682	1.06514289530463	1.11795722096114e-12
ENSG00000161547	6427	SRSF2	serine and arginine rich splicing factor 2	2885.69256994601	-0.472370961566384	1.18161361415402e-12
ENSG00000125746	24139	EML2	echinoderm microtubule associated protein like 2	244.552092913469	1.11019770983841	1.20700199558537e-12
ENSG00000117318	3399	ID3	inhibitor of DNA binding 3, HLH protein	1005.86713758134	-0.555913099880589	1.20939554974264e-12
ENSG00000186684	339761	CYP27C1	cytochrome P450 family 27 subfamily C member 1	94.3313565022335	-1.56688815956857	1.21692815522011e-12
ENSG00000248587	100861519	GDNF-AS1	GDNF antisense RNA 1	76.5230194307295	2.12823828296184	1.26292143522238e-12
ENSG00000112081	6428	SRSF3	serine and arginine rich splicing factor 3	3846.71104054179	-0.463052711661245	1.28461312658917e-12
ENSG00000167106	399665	FAM102A	family with sequence similarity 102 member A	755.52346168144	-0.611516052987637	1.2901105540006e-12
ENSG00000068079	3430	IFI35	interferon induced protein 35	238.80526666335	1.09874666792151	1.34390584195449e-12
ENSG00000111696	51559	NT5DC3	5'-nucleotidase domain containing 3	358.423605047541	0.934421936632344	1.36681495336191e-12
ENSG00000055732	55283	MCOLN3	mucolipin 3	138.613715971076	1.50282531452399	1.38659621329468e-12
ENSG00000101608	10627	MYL12A	myosin light chain 12A	784.239531879816	-0.67380523649996	1.40302100925766e-12
ENSG00000174695	153339	TMEM167A	transmembrane protein 167A	1379.91944935155	-0.495874543417089	1.41098426316242e-12
ENSG00000154380	55740	ENAH	ENAH, actin regulator	4220.22894681144	-0.365616168674982	1.51323560554096e-12
ENSG00000184178	152579	SCFD2	sec1 family domain containing 2	352.958165490429	-0.874529264113541	1.6087750907911e-12
ENSG00000082293	1310	COL19A1	collagen type XIX alpha 1 chain	1848.5236913213	0.477989275084481	1.60939206332371e-12
ENSG00000106399	6119	RPA3	replication protein A3	560.68495711433	-0.669869902459857	1.6512597597852e-12
ENSG00000130758	4294	MAP3K10	mitogen-activated protein kinase kinase kinase 10	279.621042297228	0.988865748068085	1.6512597597852e-12
ENSG00000102384	2491	CENPI	centromere protein I	443.940201894178	-0.79197374283115	1.72463993436279e-12
ENSG00000126464	57479	PRR12	proline rich 12	554.694696425786	0.716925927807533	1.78226541985942e-12
ENSG00000141564	57521	RPTOR	regulatory associated protein of MTOR complex 1	2853.16112373702	0.442240637319878	2.08713481445565e-12
ENSG00000152953	55351	STK32B	serine/threonine kinase 32B	1440.10328487582	-0.508793603692324	2.08713481445565e-12
ENSG00000133835	3295	HSD17B4	hydroxysteroid 17-beta dehydrogenase 4	1667.32770968373	-0.455064768466766	2.10634767950139e-12
ENSG00000085832	2060	EPS15	epidermal growth factor receptor pathway substrate 15	941.761559025658	-0.566477731412776	2.1473291480173e-12
ENSG00000122515	83637	ZMIZ2	zinc finger MIZ-type containing 2	1095.11240910077	0.716415954761206	2.15376713745987e-12
ENSG00000184347	6586	SLIT3	slit guidance ligand 3	20.6448829103984	-4.67806131130225	2.15376713745987e-12
ENSG00000260139	100302666	CSPG4P13	Chondroitin Sulfate Proteoglycan 4 Pseudogene 13	87.6215095862226	1.96843544073656	2.16924453731319e-12
ENSG00000144554	2177	FANCD2	Fanconi anemia complementation group D2	874.643148747317	-0.606544656543552	2.30093127741199e-12
ENSG00000182325	26233	FBXL6	F-box and leucine rich repeat protein 6	235.42043423009	1.1185878315972	2.31091451325307e-12
ENSG00000197530	142678	MIB2	mindbomb E3 ubiquitin protein ligase 2	338.480010265359	0.922549971591928	2.56741950502722e-12
ENSG00000126001	11190	CEP250	centrosomal protein 250	1468.03226468234	0.528788742127449	2.68994850136048e-12
ENSG00000155506	23367	LARP1	La ribonucleoprotein domain family member 1	3059.7472206618	0.395711302325917	2.70560166266403e-12
ENSG00000167995	7439	BEST1	bestrophin 1	64.3088665747483	2.51885564799167	2.7566107488747e-12
ENSG00000185122	3297	HSF1	heat shock transcription factor 1	847.28917912419	0.621129455519064	2.93619391736603e-12
ENSG00000077147	56889	TM9SF3	transmembrane 9 superfamily member 3	2476.97722496333	-0.401840223943203	3.05737549246212e-12
ENSG00000136636	51133	KCTD3	potassium channel tetramerization domain containing 3	1492.51989997583	-0.471334323879897	3.06641883483745e-12
ENSG00000124216	6615	SNAI1	snail family transcriptional repressor 1	618.52850552033	-0.645051456811704	3.38284434706349e-12
ENSG00000183963	6525	SMTN	smoothelin	1554.24751776875	-0.597356184232369	3.56035243196991e-12
ENSG00000143252	6391	SDHC	succinate dehydrogenase complex subunit C	795.111693715965	-0.625347417589174	3.59887780605275e-12
ENSG00000105887	136319	MTPN	myotrophin	4727.17383032099	-0.424060982791788	3.68947190941681e-12
ENSG00000106462	2146	EZH2	enhancer of zeste 2 polycomb repressive complex 2 subunit	1099.06372126254	-0.526957236134533	3.68947190941681e-12
ENSG00000187957	92737	DNER	delta/notch like EGF repeat containing	132.575948191133	1.47394132522645	3.75709926805776e-12
ENSG00000065320	9423	NTN1	netrin 1	675.247645098807	0.703856214444147	3.7837522193598e-12
ENSG00000167081	5090	PBX3	PBX homeobox 3	349.452430833898	-0.820024799074663	4.08246420703564e-12
ENSG00000186767	139886	SPIN4	spindlin family member 4	280.739634680162	-0.953966887055053	4.14054485445534e-12
ENSG00000244879	100129387	GABPB1-AS1	GABPB1 Antisense RNA 1	347.257028991229	1.15829348092436	4.19473220973649e-12
ENSG00000104856	5971	RELB	RELB proto-oncogene, NF-kB subunit	105.092469684915	1.70104249503936	4.19794248547872e-12
ENSG00000108055	9126	SMC3	structural maintenance of chromosomes 3	2346.24442466029	-0.41707657958738	4.23152517239506e-12
ENSG00000013441	1195	CLK1	CDC like kinase 1	429.3373774389	0.866336221707463	4.37756392333838e-12
ENSG00000124767	2739	GLO1	glyoxalase I	1875.02977778108	-0.506505636260091	4.41309663945491e-12
ENSG00000105011	55723	ASF1B	anti-silencing function 1B histone chaperone	928.975221368729	-0.658168953784248	4.63948561828294e-12
ENSG00000106772	158471	PRUNE2	prune homolog 2	132.689666327452	1.493157812187	4.67213743424793e-12
ENSG00000100219	7494	XBP1	X-box binding protein 1	1110.78975669471	0.573945651465275	4.70249114122647e-12
ENSG00000165458	3636	INPPL1	inositol polyphosphate phosphatase like 1	2491.62612954374	0.437921176390123	4.78593914753121e-12
ENSG00000141258	9905	SGSM2	small G protein signaling modulator 2	498.059659288305	0.884904467608935	4.8482791296391e-12
ENSG00000118257	8828	NRP2	neuropilin 2	6129.34622442221	0.348409200238373	4.88027832818231e-12
ENSG00000115756	3241	HPCAL1	hippocalcin like 1	2028.74548997426	-0.432438251559115	4.90301905642281e-12
ENSG00000187017	83715	ESPN	espin	64.131631189914	2.50940927173469	5.07691250286769e-12
ENSG00000095002	4436	MSH2	mutS homolog 2	1071.69201520995	-0.525699026151403	5.30588406784465e-12
ENSG00000111328	8099	CDK2AP1	cyclin dependent kinase 2 associated protein 1	1999.58452524468	-0.534151406800592	5.43070946765891e-12
ENSG00000117054	34	ACADM	acyl-CoA dehydrogenase medium chain	650.354747298711	-0.628061874424327	5.44951851352624e-12
ENSG00000118680	103910	MYL12B	myosin light chain 12B	1429.96815113292	-0.512176275135223	5.46440588192873e-12
ENSG00000168056	4054	LTBP3	latent transforming growth factor beta binding protein 3	2528.51796793107	0.488325326859488	5.4703858205599e-12
ENSG00000178234	63917	GALNT11	polypeptide N-acetylgalactosaminyltransferase 11	806.234920487505	-0.574366553181976	5.48252759024675e-12
ENSG00000124920	745	MYRF	myelin regulatory factor	64.8520637133729	-1.90005661784076	5.74919152959692e-12
ENSG00000101493	9658	ZNF516	zinc finger protein 516	561.050895025536	0.70456867312831	5.96087849860122e-12
ENSG00000149260	726	CAPN5	calpain 5	539.794824584953	-0.712735504229894	5.97014994959844e-12
ENSG00000166451	55839	CENPN	centromere protein N	712.15805164416	-0.710086911190073	6.06177593385412e-12
ENSG00000172020	2596	GAP43	growth associated protein 43	23.3740373217783	-3.70444284427409	6.08200639066264e-12
ENSG00000120992	10434	LYPLA1	lysophospholipase I	664.78150914823	-0.690056034033685	6.79090381249922e-12
ENSG00000197971	4155	MBP	myelin basic protein	201.112585974174	1.14562310519674	6.8182871739538e-12
ENSG00000198373	11060	WWP2	WW domain containing E3 ubiquitin protein ligase 2	1518.2411441047	-0.680254103119283	6.95068473485521e-12
ENSG00000152492	152137	CCDC50	coiled-coil domain containing 50	1214.93341623379	-0.536958964478305	7.13310945796027e-12
ENSG00000108091	8030	CCDC6	coiled-coil domain containing 6	687.930651219482	-0.611759988144896	7.21619522273169e-12
ENSG00000184584	340061	TMEM173	transmembrane protein 173	257.46734038883	1.01814067176587	7.27453270986962e-12
ENSG00000145882	78991	PCYOX1L	prenylcysteine oxidase 1 like	266.599946668032	-0.962975278449193	7.59578948598114e-12
ENSG00000111530	55832	CAND1	cullin associated and neddylation dissociated 1	3022.34799219187	-0.401461503492435	8.09346783358881e-12
ENSG00000104897	8175	SF3A2	splicing factor 3a subunit 2	825.976384427933	0.599124103380947	8.16510888577129e-12
ENSG00000135124	5025	P2RX4	purinergic receptor P2X 4	157.148896527262	1.35312345347992	8.16673872097104e-12
ENSG00000044090	9820	CUL7	cullin 7	365.722417551387	0.952459404050401	8.39707453151356e-12
ENSG00000105656	8178	ELL	elongation factor for RNA polymerase II	160.474364665727	1.29152917847303	8.42169286944438e-12
ENSG00000123143	5585	PKN1	protein kinase N1	769.748055112456	0.66835022844571	8.50245145806904e-12
ENSG00000072121	23503	ZFYVE26	zinc finger FYVE-type containing 26	533.722087212621	0.725419333911859	8.59187062697147e-12
ENSG00000089094	84678	KDM2B	lysine demethylase 2B	320.930700629402	0.94997031961794	8.65258990529067e-12
ENSG00000151612	152485	ZNF827	zinc finger protein 827	1091.32332957315	0.52915282962943	9.04411158866818e-12
ENSG00000196182	83931	STK40	serine/threonine kinase 40	335.283254012648	0.881862418454259	9.06647535967931e-12
ENSG00000104518	79792	GSDMD	gasdermin D	484.750799116969	0.747448297311945	9.17494241581547e-12
ENSG00000114120	55186	SLC25A36	solute carrier family 25 member 36	662.89833505354	0.655719992583599	9.35652940489153e-12
ENSG00000183495	57634	EP400	E1A binding protein p400	843.24062225272	0.639473780085516	9.95600204129711e-12
ENSG00000095752	3589	IL11	interleukin 11	262.231373495752	1.05820497608475	1.08768435478566e-11
ENSG00000188042	10123	ARL4C	ADP ribosylation factor like GTPase 4C	1129.22431403254	0.576588324119929	1.0892717025607e-11
ENSG00000109861	1075	CTSC	cathepsin C	2251.78448825678	-0.451412047869339	1.14701413157919e-11
ENSG00000158022	84676	TRIM63	tripartite motif containing 63	45.3531438099858	4.27869672278359	1.15252511993679e-11
ENSG00000143067	90874	ZNF697	zinc finger protein 697	565.30694987665	0.700624745896109	1.20471969200615e-11
ENSG00000093000	10762	NUP50	nucleoporin 50	1376.76960344849	-0.463993010108389	1.24059294876938e-11
ENSG00000135596	64780	MICAL1	microtubule associated monooxygenase, calponin and LIM domain containing 1	352.530547323678	0.976996681002993	1.32784750472662e-11
ENSG00000115355	55704	CCDC88A	coiled-coil domain containing 88A	1359.38071592711	-0.531825458316874	1.35845868776412e-11
ENSG00000070047	57661	PHRF1	PHD and ring finger domains 1	898.867442117875	0.586226339312447	1.40511658481912e-11
ENSG00000114302	5576	PRKAR2A	protein kinase cAMP-dependent type II regulatory subunit alpha	1034.34211607005	-0.513954514662736	1.41564979364674e-11
ENSG00000104859	11129	CLASRP	CLK4 associating serine/arginine rich protein	416.853701219391	0.863997877451414	1.43525453489416e-11
ENSG00000081803	93664	CADPS2	calcium dependent secretion activator 2	46.489741649768	3.24035652313631	1.48893807308698e-11
ENSG00000173486	2286	FKBP2	FK506 binding protein 2	746.482885604778	0.648295844465558	1.52865390402815e-11
ENSG00000149636	79980	DSN1	DSN1 homolog, MIS12 kinetochore complex component	1278.11848883515	-0.506952036696663	1.52895083026003e-11
ENSG00000012963	55148	UBR7	ubiquitin protein ligase E3 component n-recognin 7 (putative)	787.191322930628	-0.600186637599122	1.58873913049428e-11
ENSG00000163328	151556	GPR155	G protein-coupled receptor 155	388.746604036038	-0.753746796427216	1.65277997210242e-11
ENSG00000164109	4085	MAD2L1	mitotic arrest deficient 2 like 1	1091.88096242046	-0.563344270429056	1.68940683825062e-11
ENSG00000198911	6721	SREBF2	sterol regulatory element binding transcription factor 2	2093.67470080647	-0.413195543897147	1.69785192421338e-11
ENSG00000147010	30011	SH3KBP1	SH3 domain containing kinase binding protein 1	1880.25487201338	-0.443604868569051	1.82477647960002e-11
ENSG00000182621	23236	PLCB1	phospholipase C beta 1	1289.3113549496	-0.475903612205363	1.85152374031869e-11
ENSG00000166068	161742	SPRED1	sprouty related EVH1 domain containing 1	1842.67063727392	-0.44521755355878	1.87113373204594e-11
ENSG00000106333	5118	PCOLCE	procollagen C-endopeptidase enhancer	1789.76039914593	0.460818377280074	1.88782748814804e-11
ENSG00000084090	56910	STARD7	StAR related lipid transfer domain containing 7	2267.62303515842	-0.434307654194789	1.93140185203682e-11
ENSG00000048828	23196	FAM120A	family with sequence similarity 120A	2323.62837942076	-0.396829363073158	1.933370554279e-11
ENSG00000077514	10714	POLD3	DNA polymerase delta 3, accessory subunit	651.571383071562	-0.612871131109247	1.9440290014624e-11
ENSG00000175387	4087	SMAD2	SMAD family member 2	1139.12086543524	-0.491492786239055	1.9652302714858e-11
ENSG00000108840	10014	HDAC5	histone deacetylase 5	275.365186804592	0.967999318472247	2.01470771167731e-11
ENSG00000030582	2896	GRN	granulin precursor	1701.53449986967	0.466034733494932	2.09229846708533e-11
ENSG00000182504	79598	CEP97	centrosomal protein 97	458.392072343989	-0.728382170222741	2.15650080962611e-11
ENSG00000101439	1471	CST3	cystatin C	1564.75736986921	0.496571551473767	2.19842615942016e-11
ENSG00000117724	1063	CENPF	centromere protein F	5939.30571399985	-0.36377027652144	2.25016146938559e-11
ENSG00000119138	687	KLF9	Kruppel like factor 9	3055.22407042213	-0.385515722745392	2.25097112837114e-11
ENSG00000075303	55972	SLC25A40	solute carrier family 25 member 40	658.648704689544	-0.672461948420693	2.29863021275295e-11
ENSG00000162337	4041	LRP5	LDL receptor related protein 5	462.919301743511	0.775943109141617	2.30777026454181e-11
ENSG00000129925	58986	TMEM8A	transmembrane protein 8A	385.176217285795	0.823664427902271	2.33436065411352e-11
ENSG00000085733	2017	CTTN	cortactin	5123.0845873459	0.439249259020584	2.35395753167672e-11
ENSG00000156052	2776	GNAQ	G protein subunit alpha q	808.670542567677	-0.590966104072557	2.37925552617266e-11
ENSG00000179364	23241	PACS2	phosphofurin acidic cluster sorting protein 2	473.256030668262	0.778779787482846	2.3806830892358e-11
ENSG00000180801	79642	ARSJ	arylsulfatase family member J	459.574776992069	-0.724180800417754	2.50434256340015e-11
ENSG00000154274	55286	C4orf19	chromosome 4 open reading frame 19	122.7235280535	-1.36091091046659	2.6206388347371e-11
ENSG00000177732	6666	SOX12	SRY-box 12	1004.95680953552	0.566255398975676	2.62079191807382e-11
ENSG00000211460	7247	TSN	translin	1835.77707303601	-0.484083337483328	2.67724685976872e-11
ENSG00000181467	5912	RAP2B	RAP2B, member of RAS oncogene family	402.672743404686	0.799574176616367	2.69348495256331e-11
ENSG00000206527	201562	HACD2	3-hydroxyacyl-CoA dehydratase 2	749.077335003621	-0.583346146721375	2.73127734545344e-11
ENSG00000113569	9631	NUP155	nucleoporin 155	1082.67143672289	-0.554798800843459	2.78486771896671e-11
ENSG00000156531	84295	PHF6	PHD finger protein 6	859.022641992203	-0.564978799438674	2.93959694498155e-11
ENSG00000111676	1822	ATN1	atrophin 1	2093.34575205869	0.441402815816515	3.06674557012742e-11
ENSG00000141337	22901	ARSG	arylsulfatase G	87.5684926778363	1.82572569878981	3.21905441383629e-11
ENSG00000198561	1500	CTNND1	catenin delta 1	1654.66876551497	-0.436667984339411	3.28427267451041e-11
ENSG00000214193	79729	SH3D21	SH3 domain containing 21	62.0579717002325	2.59933517222961	3.35365521345454e-11
ENSG00000097046	8317	CDC7	cell division cycle 7	548.609612569144	-0.71206355957868	3.44754745236531e-11
ENSG00000128683	2571	GAD1	glutamate decarboxylase 1	360.864744227479	0.901817816704006	3.45143963403684e-11
ENSG00000145907	10146	G3BP1	G3BP stress granule assembly factor 1	3294.66213061075	-0.419418041689383	3.50002360166435e-11
ENSG00000109689	57620	STIM2	stromal interaction molecule 2	649.766578915624	-0.602187164601778	3.58882617925614e-11
ENSG00000177542	79751	SLC25A22	solute carrier family 25 member 22	312.558917834042	0.889286648214935	3.59195645904971e-11
ENSG00000089050	10741	RBBP9	RB binding protein 9, serine hydrolase	725.450633066233	-0.58125089943336	3.60317636455048e-11
ENSG00000165487	221154	MICU2	mitochondrial calcium uptake 2	438.000510770745	-0.72531844293204	3.65956533162303e-11
ENSG00000197045	2764	GMFB	glia maturation factor beta	1148.27424453902	-0.503478698453534	3.71472058632249e-11
ENSG00000137812	57082	KNL1	kinetochore scaffold 1	1184.35284775487	-0.516229559411205	3.79035634034032e-11
ENSG00000117597	27042	DIEXF	digestive organ expansion factor homolog (zebrafish)	519.650425578989	0.691678377397189	3.81914126624781e-11
ENSG00000119318	5887	RAD23B	RAD23 homolog B, nucleotide excision repair protein	2997.73048691343	-0.407776382417538	3.90002299360734e-11
ENSG00000130508	7837	PXDN	peroxidasin	4105.33280268292	-0.366288147265927	4.03847964837142e-11
ENSG00000141664	54877	ZCCHC2	zinc finger CCHC-type containing 2	283.372794383412	0.977948141313938	4.11376953485566e-11
ENSG00000176974	6470	SHMT1	serine hydroxymethyltransferase 1	671.786889444742	-0.589940352189313	4.12182225635001e-11
ENSG00000162066	51005	AMDHD2	amidohydrolase domain containing 2	300.238540194705	0.951864846442968	4.14226048872844e-11
ENSG00000092445	7301	TYRO3	TYRO3 protein tyrosine kinase	688.332763034107	0.652295481627434	4.24338607928817e-11
ENSG00000163251	7855	FZD5	frizzled class receptor 5	124.414510748612	1.41681136525437	4.28329624169018e-11
ENSG00000170381	9723	SEMA3E	semaphorin 3E	117.713518328564	1.48271473950199	4.30250194437149e-11
ENSG00000099904	29801	ZDHHC8	zinc finger DHHC-type containing 8	729.968339215436	0.686440347969609	4.31050993766669e-11
ENSG00000152558	114908	TMEM123	transmembrane protein 123	1037.75876895651	-0.504377172601334	4.49067489372193e-11
ENSG00000118058	4297	KMT2A	lysine methyltransferase 2A	989.446606603266	0.549773820812486	4.53099444532514e-11
ENSG00000085224	546	ATRX	ATRX, chromatin remodeler	1758.30209653257	-0.476620905870179	4.6146044228322e-11
ENSG00000179094	5187	PER1	period circadian regulator 1	204.248604894824	1.11449791132446	4.68402288775011e-11
ENSG00000107798	3988	LIPA	lipase A, lysosomal acid type	2901.56606858772	-0.409369817062635	4.69400638462389e-11
ENSG00000203727	389432	SAMD5	sterile alpha motif domain containing 5	255.813781970846	0.986124031727025	4.69400638462389e-11
ENSG00000104723	7991	TUSC3	tumor suppressor candidate 3	1592.42656298666	-0.464805913213226	4.77935834006959e-11
ENSG00000133121	90627	STARD13	StAR related lipid transfer domain containing 13	735.715709329805	0.603465724138695	4.91998176674994e-11
ENSG00000261236	23246	BOP1	block of proliferation 1	1043.49047309831	0.549837692688961	5.12429878441969e-11
ENSG00000172366	84331	MCRIP2	MAPK regulated corepressor interacting protein 2	171.014538344236	1.27834997032888	5.2783670726207e-11
ENSG00000071246	22846	VASH1	vasohibin 1	145.20416938386	-1.14919116022256	5.48862841625674e-11
ENSG00000172531	5499	PPP1CA	protein phosphatase 1 catalytic subunit alpha	2263.43039927738	-0.43847312053886	5.5880769063398e-11
ENSG00000133393	123811	FOPNL	FGFR1OP N-terminal like	571.178734890236	-0.694014987550172	5.60841065549856e-11
ENSG00000135631	26056	RAB11FIP5	RAB11 family interacting protein 5	572.47806763867	0.664426761117855	5.91746590263314e-11
ENSG00000170525	5209	PFKFB3	6-phosphofructo-2-kinase/fructose-2,6-biphosphatase 3	1415.90424347851	-0.459052685185697	5.97203404434529e-11
ENSG00000161888	147841	SPC24	SPC24, NDC80 kinetochore complex component	404.317170936929	-0.736605380380791	6.16919080184646e-11
ENSG00000102878	3299	HSF4	heat shock transcription factor 4	156.180436627965	1.52793039247437	6.18465396478025e-11
ENSG00000110841	8496	PPFIBP1	PPFIA binding protein 1	1798.36546567009	0.426481311838663	6.27060221924498e-11
ENSG00000158008	2134	EXTL1	exostosin like glycosyltransferase 1	4375.92156438746	-0.34227570357407	6.4337538728046e-11
ENSG00000154736	11096	ADAMTS5	ADAM metallopeptidase with thrombospondin type 1 motif 5	46.2017108479644	-2.1494066467128	6.45098787130483e-11
ENSG00000244405	2119	ETV5	ETS variant 5	1610.85598644545	-0.462369073985158	6.52449185985088e-11
ENSG00000168938	5480	PPIC	peptidylprolyl isomerase C	619.654458121284	-0.622226730930541	6.59478930329366e-11
ENSG00000125482	7270	TTF1	transcription termination factor 1	378.970855417051	-0.733831206912519	6.68853936689318e-11
ENSG00000128829	440275	EIF2AK4	eukaryotic translation initiation factor 2 alpha kinase 4	2269.86966393011	-0.434818509152783	6.86997643324886e-11
ENSG00000114423	868	CBLB	Cbl proto-oncogene B	177.126972605229	1.25606674941974	6.96396528721487e-11
ENSG00000115107	55240	STEAP3	STEAP3 metalloreductase	228.236079218716	1.01456666501318	7.17378080943491e-11
ENSG00000155846	133522	PPARGC1B	PPARG coactivator 1 beta	97.2401433114949	1.66271052024312	7.35734463602428e-11
ENSG00000184349	1946	EFNA5	ephrin A5	348.259418402276	-0.807904328366813	7.49569523708367e-11
ENSG00000204389	3303	HSPA1A	heat shock protein family A (Hsp70) member 1A	397.541394918804	0.769406561620912	7.49663662948956e-11
ENSG00000213639	5500	PPP1CB	protein phosphatase 1 catalytic subunit beta	2351.53389994109	-0.439700978051671	7.50016908306356e-11
ENSG00000186174	283149	BCL9L	B cell CLL/lymphoma 9 like	821.765283701752	0.561236614366948	7.50312864650794e-11
ENSG00000126391	83786	FRMD8	FERM domain containing 8	1057.5291246172	-0.516276984636958	7.6256455876646e-11
ENSG00000111077	23371	TNS2	tensin 2	457.468593907386	0.797199207669174	7.87640329372402e-11
ENSG00000004660	84254	CAMKK1	calcium/calmodulin dependent protein kinase kinase 1	94.1837459644854	1.79689028058796	8.21959513452836e-11
ENSG00000149269	5058	PAK1	p21 (RAC1) activated kinase 1	944.199956826992	-0.510674358019752	8.39583513671802e-11
ENSG00000105429	1954	MEGF8	multiple EGF like domains 8	1595.49917227875	0.486061734105078	8.51016197248430e-11
ENSG00000138760	950	SCARB2	scavenger receptor class B member 2	4520.26039194606	-0.381836697104988	8.79080272455378e-11
ENSG00000163531	23114	NFASC	neurofascin	398.028940500942	-0.719950975919348	8.85122248553563e-11
ENSG00000076356	5362	PLXNA2	plexin A2	48.9493996485672	2.74950785186292	8.86900448951756e-11
ENSG00000167110	2801	GOLGA2	golgin A2	1179.11782500043	0.493079150500056	8.86900448951756e-11
ENSG00000204713	5987	TRIM27	tripartite motif containing 27	840.617222933135	0.577516460705892	8.93004562284674e-11
ENSG00000079387	29843	SENP1	SUMO specific peptidase 1	591.838711302682	-0.636691931792146	9.27101505272316e-11
ENSG00000188783	5549	PRELP	proline and arginine rich end leucine rich repeat protein	76.4531603887409	-1.61631614908466	9.28134106437105e-11
ENSG00000158863	64760	FAM160B2	family with sequence similarity 160 member B2	468.890339545341	0.790043238935852	9.366368749532e-11
ENSG00000124181	5335	PLCG1	phospholipase C gamma 1	2485.72471159903	0.415635364009809	9.41493149343555e-11
ENSG00000178691	23512	SUZ12	SUZ12 polycomb repressive complex 2 subunit	1104.99937057191	-0.482453053832552	9.57890856899336e-11
ENSG00000143499	56950	SMYD2	SET and MYND domain containing 2	704.216964592672	-0.607789345626942	9.69099411703982e-11
ENSG00000167173	56905	C15orf39	chromosome 15 open reading frame 39	227.137238908409	1.00858496974997	9.72486552797646e-11
ENSG00000177707	25945	NECTIN3	nectin cell adhesion molecule 3	437.101269803949	-0.702363145473272	1.01171931411381e-10
ENSG00000170677	9306	SOCS6	suppressor of cytokine signaling 6	613.295753815133	-0.646034296757277	1.01842626156055e-10
ENSG00000176049	9832	JAKMIP2	janus kinase and microtubule interacting protein 2	299.985408354222	-0.809041438831764	1.01842626156055e-10
ENSG00000130511	170463	SSBP4	single stranded DNA binding protein 4	607.24864072824	0.627834793146286	1.02087027978796e-10
ENSG00000174442	55055	ZWILCH	zwilch kinetochore protein	780.727059591293	-0.550709794737745	1.02786012703584e-10
ENSG00000154803	201163	FLCN	folliculin	316.482400395225	0.886017548379869	1.04006751189662e-10
ENSG00000166398	9710	KIAA0355	KIAA0355	362.601346635789	0.803704531088626	1.04337935905271e-10
ENSG00000167566	57701	NCKAP5L	NCK associated protein 5 like	487.501965867711	0.719302868419928	1.04742013370025e-10
ENSG00000176826	360132	FKBP9P1	FK506 binding protein 9 pseudogene 1	55.9066942166117	2.46646690379478	1.04981994159216e-10
ENSG00000112280	1297	COL9A1	collagen type IX alpha 1 chain	36.6531389719609	-2.46297466389444	1.05020491387094e-10
ENSG00000103222	4363	ABCC1	ATP binding cassette subfamily C member 1	651.500060436989	0.610950731154709	1.05262648828442e-10
ENSG00000103642	114294	LACTB	lactamase beta	297.92815700505	0.889792535582569	1.05818158113542e-10
ENSG00000205213	55366	LGR4	leucine rich repeat containing G protein-coupled receptor 4	536.134464438127	-0.754521391787415	1.05909860170348e-10
ENSG00000155561	23165	NUP205	nucleoporin 205	2477.33748416885	-0.378940561601692	1.06278294050519e-10
ENSG00000168488	11273	ATXN2L	ataxin 2 like	1961.25600287519	0.521766325035682	1.07456830865686e-10
ENSG00000118369	57558	USP35	ubiquitin specific peptidase 35	421.810348044697	0.869005057716261	1.09448478428076e-10
ENSG00000096060	2289	FKBP5	FK506 binding protein 5	339.500525983088	-0.776851132051267	1.13900254952082e-10
ENSG00000108861	1845	DUSP3	dual specificity phosphatase 3	464.498266449906	0.711468075122755	1.15008800809549e-10
ENSG00000120705	2107	ETF1	eukaryotic translation termination factor 1	3708.36401303424	-0.3592294350177	1.15500149075796e-10
ENSG00000142798	3339	HSPG2	heparan sulfate proteoglycan 2	5275.10279111524	0.392606046180079	1.15967303401538e-10
ENSG00000166847	84516	DCTN5	dynactin subunit 5	1228.67109014803	-0.471700569772551	1.1619895307593e-10
ENSG00000104967	4858	NOVA2	NOVA alternative splicing regulator 2	21.5016473110349	-3.36399192365993	1.25974873472025e-10
ENSG00000182628	348235	SKA2	spindle and kinetochore associated complex subunit 2	997.522028232588	-0.529079745351491	1.30797368547947e-10
ENSG00000144827	55347	ABHD10	abhydrolase domain containing 10	339.011828611088	-0.788429808995035	1.34083495098845e-10
ENSG00000179750	9582	APOBEC3B	apolipoprotein B mRNA editing enzyme catalytic subunit 3B	535.693098127483	-0.649989686873341	1.34853010606012e-10
ENSG00000091317	54918	CMTM6	CKLF like MARVEL transmembrane domain containing 6	1721.85561505396	-0.484876627732023	1.40321942335211e-10
ENSG00000149716	220064	ORAOV1	oral cancer overexpressed 1	209.270100591368	1.0648416449477	1.41799811674963e-10
ENSG00000115884	6382	SDC1	syndecan 1	415.171260548354	-0.703601908500203	1.50199972767365e-10
ENSG00000213064	375035	SFT2D2	SFT2 domain containing 2	1124.79805953682	-0.491019152118281	1.5082391482147e-10
ENSG00000072864	54820	NDE1	nudE neurodevelopment protein 1	668.870256385577	-0.61243523632188	1.50983802823354e-10
ENSG00000139921	81542	TMX1	thioredoxin related transmembrane protein 1	1392.9432448666	-0.463326338353079	1.55528841164509e-10
ENSG00000101596	23347	SMCHD1	structural maintenance of chromosomes flexible hinge domain containing 1	1196.4691410925	-0.466933503391956	1.62969906526246e-10
ENSG00000158623	26958	COPG2	coatomer protein complex subunit gamma 2	671.340997106686	-0.588040781733428	1.64340275817595e-10
ENSG00000145050	7873	MANF	mesencephalic astrocyte derived neurotrophic factor	1394.74820042849	-0.50678936894339	1.65331848186021e-10
ENSG00000239264	81567	TXNDC5	thioredoxin domain containing 5	144.209049131545	1.27134456358171	1.70032817443109e-10
ENSG00000136378	11173	ADAMTS7	ADAM metallopeptidase with thrombospondin type 1 motif 7	87.4036486157018	1.71880383613937	1.75910220917952e-10
ENSG00000111540	5869	RAB5B	RAB5B, member RAS oncogene family	1158.90142992275	-0.465272865185997	1.77254432502777e-10
ENSG00000140694	5073	PARN	poly(A)-specific ribonuclease	565.408948607522	-0.610937588905428	1.81844720772863e-10
ENSG00000125864	631	BFSP1	beaded filament structural protein 1	393.167476677985	-0.799056464602262	1.84738725016196e-10
ENSG00000146278	10957	PNRC1	proline rich nuclear receptor coactivator 1	389.021826028528	0.757676315863114	1.84738725016196e-10
ENSG00000090054	10558	SPTLC1	serine palmitoyltransferase long chain base subunit 1	738.843090315155	-0.563148229296305	1.86550267054343e-10
ENSG00000071626	26528	DAZAP1	DAZ associated protein 1	1300.71905800071	0.458464805414211	1.98690617359722e-10
ENSG00000160767	10712	FAM189B	family with sequence similarity 189 member B	710.100547513325	0.592307815972263	1.99006264334141e-10
ENSG00000011243	26993	AKAP8L	A-kinase anchoring protein 8 like	213.597833318993	1.07532583455168	2.02838388512946e-10
ENSG00000070423	55658	RNF126	ring finger protein 126	435.463562557433	0.726413139026413	2.03386342159868e-10
ENSG00000112992	23530	NNT	nicotinamide nucleotide transhydrogenase	1604.38421140756	-0.424774986937379	2.09496709233762e-10
ENSG00000141569	201292	TRIM65	tripartite motif containing 65	746.435205815665	0.566805061853661	2.11893467603073e-10
ENSG00000108819	84687	PPP1R9B	protein phosphatase 1 regulatory subunit 9B	1527.74872659691	0.437295113161544	2.12715065915378e-10
ENSG00000175556	79836	LONRF3	LON peptidase N-terminal domain and ring finger 3	62.8011227613279	2.11687508321621	2.14110233239319e-10
ENSG00000038382	7204	TRIO	trio Rho guanine nucleotide exchange factor	808.993164129164	0.558310253660877	2.15228271509019e-10
ENSG00000165802	26012	NSMF	NMDA receptor synaptonuclear signaling and neuronal migration factor	654.897452629648	0.635937931920134	2.22054283463944e-10
ENSG00000198898	830	CAPZA2	capping actin protein of muscle Z-line alpha subunit 2	1570.43965545284	-0.460852202700113	2.22639145901952e-10
ENSG00000148110	84641	MFSD14B	major facilitator superfamily domain containing 14B	1150.87502578315	-0.477808179627231	2.28969378439216e-10
ENSG00000131732	84240	ZCCHC9	zinc finger CCHC-type containing 9	396.647672656792	0.746302278466735	2.3608083928941e-10
ENSG00000071051	8440	NCK2	NCK adaptor protein 2	1206.74556176693	0.510574916774523	2.43094021760772e-10
ENSG00000243335	154881	KCTD7	potassium channel tetramerization domain containing 7	398.973142615698	0.788313619898091	2.43910697934482e-10
ENSG00000175305	9134	CCNE2	cyclin E2	226.441156499264	-0.92722195764316	2.44089483587962e-10
ENSG00000142186	57410	SCYL1	SCY1 like pseudokinase 1	1266.15261112728	0.507289523453573	2.49291414365931e-10
ENSG00000112769	3910	LAMA4	laminin subunit alpha 4	5917.22816861693	-0.341679761015854	2.52078572969007e-10
ENSG00000164292	22836	RHOBTB3	Rho related BTB domain containing 3	497.917458782324	0.676968024272124	2.53274936855186e-10
ENSG00000109472	1363	CPE	carboxypeptidase E	166.112228229876	-1.09048664883711	2.59788651809458e-10
ENSG00000165476	221035	REEP3	receptor accessory protein 3	1133.94612079294	-0.475882854356738	2.61184039406107e-10
ENSG00000164211	134429	STARD4	StAR related lipid transfer domain containing 4	1317.94068649484	-0.456664568949764	2.62117674870974e-10
ENSG00000151503	23310	NCAPD3	non-SMC condensin II complex subunit D3	1387.25035211996	-0.43802459327223	2.95430943789514e-10
ENSG00000113575	5515	PPP2CA	protein phosphatase 2 catalytic subunit alpha	2523.41440542486	-0.407129599296517	3.1988920930069e-10
ENSG00000112787	57666	FBRSL1	fibrosin like 1	374.004530743693	0.862347969414457	3.19907134672985e-10
ENSG00000080166	1638	DCT	dopachrome tautomerase	219.134343544605	0.993664012771288	3.22059400984714e-10
ENSG00000114251	7474	WNT5A	Wnt family member 5A	1975.71548842632	-0.399982852403945	3.23107550399011e-10
ENSG00000178202	143888	KDELC2	KDEL motif containing 2	825.436635038702	-0.568389089574201	3.23107550399011e-10
ENSG00000110697	9600	PITPNM1	phosphatidylinositol transfer protein membrane associated 1	599.962588740986	0.622635237573848	3.29962796290104e-10
ENSG00000106804	727	C5	complement C5	218.651445240101	-0.906849118853961	3.3114831481661e-10
ENSG00000095951	3096	HIVEP1	human immunodeficiency virus type I enhancer binding protein 1	242.035618047063	0.942129689342106	3.43921646276546e-10
ENSG00000023287	9821	RB1CC1	RB1 inducible coiled-coil 1	754.717656489693	-0.53807272679662	3.44061438029028e-10
ENSG00000138600	84888	SPPL2A	signal peptide peptidase like 2A	967.217701230939	-0.522820939523478	3.45777037017555e-10
ENSG00000197989	85028	SNHG12	small nucleolar RNA host gene 12	113.794866528251	1.50218892246703	3.4839281689661e-10
ENSG00000214114	26292	MYCBP	MYC binding protein	188.03379462906	-0.985549569921384	3.5304455180457e-10
ENSG00000108424	3837	KPNB1	karyopherin subunit beta 1	8052.18607973064	-0.308837651017647	3.60587823446275e-10
ENSG00000177943	158056	MAMDC4	MAM domain containing 4	164.755589654816	1.37648916186291	3.66068821767951e-10
ENSG00000113328	900	CCNG1	cyclin G1	1646.87554170862	-0.450805207215243	3.74949474869965e-10
ENSG00000115548	55818	KDM3A	lysine demethylase 3A	1214.02329869136	0.502476672208428	3.79956635314938e-10
ENSG00000159674	10417	SPON2	spondin 2	108.260117033875	1.46764863713862	3.85296103226601e-10
ENSG00000131016	9590	AKAP12	A-kinase anchoring protein 12	3198.94295474039	0.354436866358932	3.92318848438856e-10
ENSG00000132383	6117	RPA1	replication protein A1	1735.15809423781	-0.479448208659086	3.93349498857433e-10
ENSG00000177283	8325	FZD8	frizzled class receptor 8	411.386468309294	-0.793856265968624	3.93795966794074e-10
ENSG00000023445	330	BIRC3	baculoviral IAP repeat containing 3	38.6250889578974	3.82024758261532	4.0544151841977e-10
ENSG00000001460	90529	STPG1	sperm tail PG-rich repeat containing 1	185.266392879575	-0.984205431438383	4.08893076323026e-10
ENSG00000142910	64129	TINAGL1	tubulointerstitial nephritis antigen like 1	70.7598023434938	-1.60415038008662	4.23872971774711e-10
ENSG00000178585	56998	CTNNBIP1	catenin beta interacting protein 1	569.223712535177	-0.684504043681088	4.39890545942961e-10
ENSG00000131398	3748	KCNC3	potassium voltage-gated channel subfamily C member 3	69.1747304406379	1.99590729575114	4.41303844412905e-10
ENSG00000094804	990	CDC6	cell division cycle 6	1234.46113735396	-0.467408748151931	4.43079185950702e-10
ENSG00000141456	27043	PELP1	proline, glutamate and leucine rich protein 1	956.40257571829	0.510756875822623	4.51204406673621e-10
ENSG00000172845	6670	SP3	Sp3 transcription factor	1870.79751895894	-0.433983502955406	4.51621005886214e-10
ENSG00000111684	10162	LPCAT3	lysophosphatidylcholine acyltransferase 3	156.813252016116	-1.09300432772487	4.67208369804584e-10
ENSG00000171792	83695	RHNO1	RAD9-HUS1-RAD1 interacting nuclear orphan 1	635.914659751691	-0.604188107825535	4.77700399589426e-10
ENSG00000147439	55909	BIN3	bridging integrator 3	688.89081830725	0.628566538088219	4.879043132486e-10
ENSG00000050820	9564	BCAR1	BCAR1, Cas family scaffold protein	1006.63110628665	0.553517905754334	4.91849620705626e-10
ENSG00000068489	55771	PRR11	proline rich 11	1256.64214134255	-0.451832591362079	4.91849620705626e-10
ENSG00000058668	493	ATP2B4	ATPase plasma membrane Ca2+ transporting 4	2693.18355945471	0.364433943526052	4.92230033906455e-10
ENSG00000185033	10509	SEMA4B	semaphorin 4B	625.724989812786	0.625020492254556	4.97226431313693e-10
ENSG00000187531	51547	SIRT7	sirtuin 7	475.572605877058	0.848938526165644	4.99029533669639e-10
ENSG00000184677	9923	ZBTB40	zinc finger and BTB domain containing 40	709.302936684882	0.78308553755695	5.00556572671449e-10
ENSG00000117308	2582	GALE	UDP-galactose-4-epimerase	611.816542295955	0.655664903516107	5.05802293892227e-10
ENSG00000131018	23345	SYNE1	spectrin repeat containing nuclear envelope protein 1	250.122197404412	0.934607274615554	5.05802293892227e-10
ENSG00000125124	583	BBS2	Bardet-Biedl syndrome 2	650.552675657019	-0.576757816306529	5.19735010243641e-10
ENSG00000242574	3109	HLA-DMB	major histocompatibility complex, class II, DM beta	272.091746078153	-0.810778284682723	5.38570813147021e-10
ENSG00000203880	55251	PCMTD2	protein-L-isoaspartate (D-aspartate) O-methyltransferase domain containing 2	711.956877802706	-0.542056002462788	5.40856587179961e-10
ENSG00000167513	81620	CDT1	chromatin licensing and DNA replication factor 1	852.925114226593	0.554333463494074	5.59416563046178e-10
ENSG00000086758	10075	HUWE1	HECT, UBA and WWE domain containing 1, E3 ubiquitin protein ligase	3603.84797887653	0.365881103266821	5.60157837871026e-10
ENSG00000125629	51141	INSIG2	insulin induced gene 2	406.390354927825	0.762357751558794	5.61759698363015e-10
ENSG00000100578	9786	KIAA0586	KIAA0586	453.531303530331	-0.663249057171481	5.67864740943657e-10
ENSG00000077522	88	ACTN2	actinin alpha 2	107.683890150836	1.63382482986617	5.70783292192031e-10
ENSG00000163516	55139	ANKZF1	ankyrin repeat and zinc finger domain containing 1	479.91774599807	1.69009470342939	5.72423124644854e-10
ENSG00000170522	79071	ELOVL6	ELOVL fatty acid elongase 6	353.310203102451	-0.74095323816416	5.79363133111652e-10
ENSG00000004399	23129	PLXND1	plexin D1	828.158353909271	0.551474871885817	5.81961994828585e-10
ENSG00000103657	8925	HERC1	HECT and RLD domain containing E3 ubiquitin protein ligase family member 1	900.991513107791	0.568460903727609	5.8457409589531e-10
ENSG00000011465	1634	DCN	decorin	50.0222399339436	-1.94973269724624	5.87966452807865e-10
ENSG00000163069	6443	SGCB	sarcoglycan beta	1029.18318306393	-0.499522691125475	5.87966452807865e-10
ENSG00000136826	9314	KLF4	Kruppel like factor 4	301.302182174522	0.850841864184537	5.94199206956831e-10
ENSG00000145819	23092	ARHGAP26	Rho GTPase activating protein 26	272.164870250084	-0.824753151774281	6.07272364203892e-10
ENSG00000197635	1803	DPP4	dipeptidyl peptidase 4	53.3096489317163	2.31708557394572	6.07272364203892e-10
ENSG00000185483	4919	ROR1	receptor tyrosine kinase like orphan receptor 1	196.333971344658	1.02618883369921	6.18705727343908e-10
ENSG00000087258	2775	GNAO1	G protein subunit alpha o1	361.891557046821	0.776295880305037	6.20900545955854e-10
ENSG00000109674	55247	NEIL3	nei like DNA glycosylase 3	309.598042819083	-0.785377639853871	6.25023745839953e-10
ENSG00000177410	441951	ZFAS1	ZNFX1 antisense RNA 1	327.707036942961	0.830342144310956	6.25023745839953e-10
ENSG00000182979	9112	MTA1	metastasis associated 1	574.228262422444	0.754880913902377	6.4757617900064e-10
ENSG00000082014	6604	SMARCD3	SWI/SNF related, matrix associated, actin dependent regulator of chromatin, subfamily d, member 3	292.520882547372	0.970079942988233	6.63350148114405e-10
ENSG00000174004	375387	NRROS	negative regulator of reactive oxygen species	64.5629080467335	2.03709474441676	7.05578000094289e-10
ENSG00000128791	57045	TWSG1	twisted gastrulation BMP signaling modulator 1	991.53866430838	-0.502062614394406	7.07398593924187e-10
ENSG00000080823	5891	MOK	MOK protein kinase	214.061734256158	-0.95708298372659	7.16968979219455e-10
ENSG00000119335	6418	SET	SET nuclear proto-oncogene	4148.78655339234	-0.397595368413508	7.3201658528313e-10
ENSG00000141756	60681	FKBP10	FK506 binding protein 10	3000.05516900495	0.35225388072013	7.34052006543719e-10
ENSG00000101294	81502	HM13	histocompatibility minor 13	4002.44931736836	0.349678251787384	7.41706334854194e-10
ENSG00000126214	3831	KLC1	kinesin light chain 1	259.98099397593	0.930933354712264	7.4180649791674e-10
ENSG00000101057	4605	MYBL2	MYB proto-oncogene like 2	2384.613200528	-0.457415488930326	7.43568364864826e-10
ENSG00000235823	90271	OLMALINC	oligodendrocyte maturation-associated long intergenic non-coding RNA	108.122373750219	-1.26135803262963	7.52349385442759e-10
ENSG00000173334	10221	TRIB1	tribbles pseudokinase 1	909.676367270801	-0.538097528523769	7.53918376286332e-10
ENSG00000123159	10755	GIPC1	GIPC PDZ domain containing family member 1	1381.43652498629	0.451537114291713	7.61047246663184e-10
ENSG00000241553	10093	ARPC4	actin related protein 2/3 complex subunit 4	896.48796353765	-0.545989028041136	7.62925047780362e-10
ENSG00000079313	57455	REXO1	RNA exonuclease 1 homolog	333.946143335946	0.819460510993489	8.04116154973457e-10
ENSG00000155324	65983	GRAMD2B	GRAM domain containing 2B	310.183286117856	-0.79255768017947	8.07967971743352e-10
ENSG00000223865	3115	HLA-DPB1	major histocompatibility complex, class II, DP beta 1	1457.77904716584	-0.471070950053613	8.42732348210979e-10
ENSG00000228716	1719	DHFR	dihydrofolate reductase	497.748790945079	-0.634406466965065	8.42732348210979e-10
ENSG00000102241	27336	HTATSF1	HIV-1 Tat specific factor 1	1075.92121017014	-0.501680378121507	8.67761091168231e-10
ENSG00000179954	284297	SSC5D	scavenger receptor cysteine rich family member with 5 domains	556.95497835302	0.701683472391542	8.70534496775918e-10
ENSG00000150967	23457	ABCB9	ATP binding cassette subfamily B member 9	484.537619386543	0.667641870336275	8.77824377074737e-10
ENSG00000119402	26190	FBXW2	F-box and WD repeat domain containing 2	880.872235597986	-0.552931733851135	8.86112079615238e-10
ENSG00000118960	64342	HS1BP3	HCLS1 binding protein 3	512.973002937421	0.644919809120453	8.94872383628019e-10
ENSG00000158864	4720	NDUFS2	NADH:ubiquinone oxidoreductase core subunit S2	1650.03948571026	-0.425194199726024	9.10905535100629e-10
ENSG00000035499	55789	DEPDC1B	DEP domain containing 1B	584.736533027678	-0.597861650647439	9.32137255576698e-10
ENSG00000171914	83660	TLN2	talin 2	647.515325802509	-0.586126052736762	9.66225672087474e-10
ENSG00000106638	26608	TBL2	transducin beta like 2	572.166402150723	0.619799708295017	9.72465910629335e-10
ENSG00000119414	5537	PPP6C	protein phosphatase 6 catalytic subunit	733.561116658651	-0.581065222027311	9.81246579066364e-10
ENSG00000158985	56990	CDC42SE2	CDC42 small effector 2	578.432103860257	-0.589130192051535	1.00811905077831e-09
ENSG00000142409	126208	ZNF787	zinc finger protein 787	252.681808750098	0.91262551634938	1.02271847972519e-09
ENSG00000218891	163033	ZNF579	zinc finger protein 579	189.004890013741	1.07067826904334	1.02271847972519e-09
ENSG00000083642	23047	PDS5B	PDS5 cohesin associated factor B	909.98829545861	-0.507079797746347	1.03735524896339e-09
ENSG00000148158	401548	SNX30	sorting nexin family member 30	496.513336604339	-0.619921163459488	1.05517231620847e-09
ENSG00000006282	64847	SPATA20	spermatogenesis associated 20	679.506325087764	0.569227268529974	1.06317209161448e-09
ENSG00000137364	7172	TPMT	thiopurine S-methyltransferase	781.036080453359	-0.550308547401965	1.06521377317596e-09
ENSG00000119900	79627	OGFRL1	opioid growth factor receptor like 1	692.132927833948	-0.581713661545181	1.06593368258881e-09
ENSG00000205531	4676	NAP1L4	nucleosome assembly protein 1 like 4	1609.26373292877	-0.4222168192712	1.06759829337362e-09
ENSG00000067560	387	RHOA	ras homolog family member A	5430.41664459471	-0.355556450814868	1.07170427496619e-09
ENSG00000082397	23136	EPB41L3	erythrocyte membrane protein band 4.1 like 3	40.7801253062928	4.95969844156803	1.07184531862208e-09
ENSG00000185787	10933	MORF4L1	mortality factor 4 like 1	2438.06373245617	-0.400874960561884	1.11955805151472e-09
ENSG00000160214	8568	RRP1	ribosomal RNA processing 1	560.974865047569	0.617363393486523	1.14052154554214e-09
ENSG00000147383	50814	NSDHL	NAD(P) dependent steroid dehydrogenase-like	377.377071606163	-0.719760762137772	1.17529580562393e-09
ENSG00000152455	79723	SUV39H2	suppressor of variegation 3-9 homolog 2	231.35292907582	-0.896668736027585	1.19252821704016e-09
ENSG00000198680	286319	TUSC1	tumor suppressor candidate 1	23.2687361505051	-3.08302617844254	1.2018887069147e-09
ENSG00000134326	129607	CMPK2	cytidine/uridine monophosphate kinase 2	139.735392358536	1.39958584223189	1.2103479510154e-09
ENSG00000125534	79144	PPDPF	pancreatic progenitor cell differentiation and proliferation factor	1450.15574517201	0.44217335557309	1.21048531381923e-09
ENSG00000120837	4801	NFYB	nuclear transcription factor Y subunit beta	383.330962919906	-0.704627283454696	1.21871518400208e-09
ENSG00000136527	6434	TRA2B	transformer 2 beta homolog	2402.5833909914	-0.371716442396278	1.23799742486298e-09
ENSG00000134333	3939	LDHA	lactate dehydrogenase A	22852.7870455808	-0.291813568673357	1.24149706128425e-09
ENSG00000231991	304	ANXA2P2	Annexin A2 Pseudogene 2	109.611908156625	1.40800125759508	1.24368827947468e-09
ENSG00000172725	57175	CORO1B	coronin 1B	1301.4682885239	0.45347950500856	1.27776072926039e-09
ENSG00000108557	10743	RAI1	retinoic acid induced 1	1551.35548206162	0.438627222396327	1.28601863229725e-09
ENSG00000100918	9985	REC8	REC8 meiotic recombination protein	54.8586075467983	2.51176340363895	1.33254864625076e-09
ENSG00000152137	26353	HSPB8	heat shock protein family B (small) member 8	182.492031120302	1.05548756539831	1.34756689584871e-09
ENSG00000148484	6251	RSU1	Ras suppressor protein 1	394.642044559489	-0.701997996419209	1.40655751798458e-09
ENSG00000197746	5660	PSAP	prosaposin	16515.0869498967	0.335354642312607	1.46610359758885e-09
ENSG00000164172	4338	MOCS2	molybdenum cofactor synthesis 2	946.734762973851	-0.482989030445192	1.47360863394605e-09
ENSG00000006831	79602	ADIPOR2	adiponectin receptor 2	1586.95502063389	-0.404732995679986	1.53584261687441e-09
ENSG00000130396	4301	AFDN	afadin, adherens junction formation factor	412.777277671578	0.718521115112612	1.5665812054026e-09
ENSG00000112697	55754	TMEM30A	transmembrane protein 30A	3879.3474876326	-0.32551891937847	1.59075428138174e-09
ENSG00000139505	9107	MTMR6	myotubularin related protein 6	910.230059197565	-0.515788412869518	1.59075428138174e-09
ENSG00000099901	5902	RANBP1	RAN binding protein 1	1896.2767895554	-0.429697709064381	1.62480911059618e-09
ENSG00000101004	22981	NINL	ninein like	317.293471628217	0.820381455162556	1.65598315312224e-09
ENSG00000063245	29924	EPN1	epsin 1	1428.50685752926	0.448069719851042	1.72623833883591e-09
ENSG00000103769	8766	RAB11A	RAB11A, member RAS oncogene family	1237.80286939722	-0.456369535954344	1.72623833883591e-09
ENSG00000114279	2257	FGF12	fibroblast growth factor 12	184.211165772616	-0.972631059846833	1.72623833883591e-09
ENSG00000173559	64859	NABP1	nucleic acid binding protein 1	159.134072735407	1.18202513819571	1.74425578255608e-09
ENSG00000160685	51043	ZBTB7B	zinc finger and BTB domain containing 7B	290.602544755294	0.823231641264365	1.78931723344696e-09
ENSG00000162819	148362	BROX	BRO1 domain and CAAX motif containing	1182.98454916289	-0.437509748250483	1.84151052164161e-09
ENSG00000171793	1503	CTPS1	CTP synthase 1	1438.53689755115	-0.418062010106919	1.84151052164161e-09
ENSG00000136379	58489	ABHD17C	abhydrolase domain containing 17C	740.89605391647	-0.531665734605519	1.85594418694315e-09
ENSG00000153936	9653	HS2ST1	heparan sulfate 2-O-sulfotransferase 1	1150.49224548546	-0.506390792308179	1.8848285265761e-09
ENSG00000007080	115098	CCDC124	coiled-coil domain containing 124	623.380395421262	0.595926631937916	1.93586388212774e-09
ENSG00000130638	25814	ATXN10	ataxin 10	1418.71643126289	-0.451637025659064	1.94357429120018e-09
ENSG00000059145	64718	UNKL	unkempt family like zinc finger	279.931512881379	0.837253932605159	1.94518951860439e-09
ENSG00000122862	5552	SRGN	serglycin	191.10655544095	-0.930268251948177	2.0591681409285e-09
ENSG00000164300	256987	SERINC5	serine incorporator 5	491.222785684859	0.652051473369187	2.06633258135943e-09
ENSG00000162373	79656	BEND5	BEN domain containing 5	45.851770788589	2.56199972474809	2.07960015512562e-09
ENSG00000166166	115708	TRMT61A	tRNA methyltransferase 61A	194.588175223226	1.02154676447553	2.14156438746586e-09
ENSG00000165672	10935	PRDX3	peroxiredoxin 3	1809.99399973771	-0.395096120204646	2.16085598208708e-09
ENSG00000054267	51742	ARID4B	AT-rich interaction domain 4B	899.300229725107	-0.478052586646927	2.19472955494275e-09
ENSG00000145214	1609	DGKQ	diacylglycerol kinase theta	323.432287449659	0.871138612995921	2.20010594206076e-09
ENSG00000101290	8760	CDS2	CDP-diacylglycerol synthase 2	984.876077279864	-0.465914950566182	2.209405914975e-09
ENSG00000029993	3149	HMGB3	high mobility group box 3	746.108015909106	-0.556410258717039	2.23407926493372e-09
ENSG00000171843	4300	MLLT3	MLLT3, super elongation complex subunit	409.734651742614	-0.664978996538455	2.26233829449071e-09
ENSG00000164989	203238	CCDC171	coiled-coil domain containing 171	110.042435565007	-1.24251706180677	2.27485479683583e-09
ENSG00000214357	54492	NEURL1B	neuralized E3 ubiquitin protein ligase 1B	208.48674131389	-0.894964358804028	2.2906995442736e-09
ENSG00000137177	63971	KIF13A	kinesin family member 13A	1374.18951515699	-0.410801594884922	2.32234853979148e-09
ENSG00000073169	83642	SELENOO	selenoprotein O	312.043213184036	0.872153195618133	2.32987852836537e-09
ENSG00000198121	1902	LPAR1	lysophosphatidic acid receptor 1	564.41271599638	0.599670368774066	2.34850340701895e-09
ENSG00000150995	3708	ITPR1	inositol 1,4,5-trisphosphate receptor type 1	264.228260552458	0.859680803126266	2.39516727149162e-09
ENSG00000233016	84973	SNHG7	small nucleolar RNA host gene 7	240.858922126894	0.892832291228343	2.39516727149162e-09
ENSG00000116161	27101	CACYBP	calcyclin binding protein	1505.70956326328	-0.441011599186135	2.41562397185955e-09
ENSG00000204387	50854	C6orf48	chromosome 6 open reading frame 48	668.711421887617	0.584220830703121	2.41562397185955e-09
ENSG00000169504	25932	CLIC4	chloride intracellular channel 4	5672.22848452923	-0.352289129502332	2.48461892383808e-09
ENSG00000068305	4205	MEF2A	myocyte enhancer factor 2A	1285.16710783194	0.43238564537801	2.5064556647837e-09
ENSG00000093009	8318	CDC45	cell division cycle 45	881.719208407296	-0.493909401529423	2.52969127471115e-09
ENSG00000196975	307	ANXA4	annexin A4	628.308003755255	0.594100056085371	2.59019639641649e-09
ENSG00000173039	5970	RELA	RELA proto-oncogene, NF-kB subunit	1171.04678111617	0.450134523011002	2.68538206099651e-09
ENSG00000135709	9764	KIAA0513	KIAA0513	806.240324921705	-0.526509405867902	2.69354858781876e-09
ENSG00000198673	338811	FAM19A2	family with sequence similarity 19 member A2, C-C motif chemokine like	57.7222974672262	-1.72495732310749	2.71993216001163e-09
ENSG00000115484	10575	CCT4	chaperonin containing TCP1 subunit 4	2270.52834564013	-0.37744629254111	2.95540676860492e-09
ENSG00000167460	7171	TPM4	tropomyosin 4	2596.14260079855	-0.400510138992216	2.96455147976546e-09
ENSG00000204128	257407	C2orf72	chromosome 2 open reading frame 72	36.2677488153462	3.3750806852478	2.97193474490577e-09
ENSG00000109736	10227	MFSD10	major facilitator superfamily domain containing 10	508.522109515781	0.632351427590551	2.97281183069823e-09
ENSG00000126368	9572	NR1D1	nuclear receptor subfamily 1 group D member 1	137.566889412625	1.32132786121578	2.99731454429581e-09
ENSG00000162409	5563	PRKAA2	protein kinase AMP-activated catalytic subunit alpha 2	207.824596547595	0.97515409624472	3.01662106077809e-09
ENSG00000163739	2919	CXCL1	C-X-C motif chemokine ligand 1	142.544313797265	1.20308026494405	3.07485928049054e-09
ENSG00000221869	1052	CEBPD	CCAAT enhancer binding protein delta	52.1747578272702	2.22961795119486	3.09016526275603e-09
ENSG00000184007	8073	PTP4A2	protein tyrosine phosphatase type IVA, member 2	1878.40358646307	-0.44555069229799	3.11072574049146e-09
ENSG00000171148	10474	TADA3	transcriptional adaptor 3	1275.38590472556	-0.450069451340142	3.11310255968043e-09
ENSG00000099949	8216	LZTR1	leucine zipper like transcription regulator 1	719.274402680743	0.561517309555253	3.11845640108039e-09
ENSG00000106086	84725	PLEKHA8	pleckstrin homology domain containing A8	572.921207232022	0.638131653590941	3.19509460800844e-09
ENSG00000120129	1843	DUSP1	dual specificity phosphatase 1	222.978997343483	-0.898070440282885	3.19509460800844e-09
ENSG00000115306	6711	SPTBN1	spectrin beta, non-erythrocytic 1	6423.38372008325	0.301459102881837	3.20193013739841e-09
ENSG00000108671	5717	PSMD11	proteasome 26S subunit, non-ATPase 11	2000.05794472101	-0.369531701786906	3.22609515002818e-09
ENSG00000170961	3037	HAS2	hyaluronan synthase 2	202.902839915751	1.11182228446306	3.22609515002818e-09
ENSG00000198961	9867	PJA2	praja ring finger ubiquitin ligase 2	2244.89871682348	-0.36578507577965	3.22813862958234e-09
ENSG00000104907	55621	TRMT1	tRNA methyltransferase 1	387.695266753301	0.721381076778425	3.23559983616953e-09
ENSG00000131171	6451	SH3BGRL	SH3 domain binding glutamate rich protein like	790.374049888262	-0.55545498213991	3.31427296475054e-09
ENSG00000153130	60592	SCOC	short coiled-coil protein	900.055502251909	-0.510787639603897	3.33048312197832e-09
ENSG00000155097	528	ATP6V1C1	ATPase H+ transporting V1 subunit C1	1475.71598929033	0.419423606374927	3.5730593556421e-09
ENSG00000099139	5125	PCSK5	proprotein convertase subtilisin/kexin type 5	436.233674301887	0.675455263855566	3.57554270013677e-09
ENSG00000175467	9092	SART1	SART1, U4/U6.U5 tri-snRNP-associated protein 1	1696.10541066218	0.420418770730106	3.60220051596094e-09
ENSG00000196526	60312	AFAP1	actin filament associated protein 1	1161.42023315507	0.4723905562768	3.65431098088982e-09
ENSG00000120889	8795	TNFRSF10B	TNF receptor superfamily member 10b	1528.81508405616	0.417308303437142	3.65734748190645e-09
ENSG00000204525	3107	HLA-C	major histocompatibility complex, class I, C	1443.68668929661	0.49832549675395	3.7070928259598e-09
ENSG00000214182	150928	PTMAP5	Prothymosin Alpha Pseudogene 5	114.858966456317	1.43990766557219	3.73860484072457e-09
ENSG00000129484	10038	PARP2	poly(ADP-ribose) polymerase 2	469.523221447347	-0.621348720199582	3.75163126376518e-09
ENSG00000140983	89941	RHOT2	ras homolog family member T2	1117.52078838753	0.526822397186261	3.78901829699496e-09
ENSG00000142192	351	APP	amyloid beta precursor protein	9724.98914650534	-0.298793047217669	3.78901829699496e-09
ENSG00000124782	6239	RREB1	ras responsive element binding protein 1	463.400009100009	0.646121247056788	3.8679560533301e-09
ENSG00000103264	79791	FBXO31	F-box protein 31	332.302879830548	0.784079972394567	3.8730138168994e-09
ENSG00000221963	80830	APOL6	apolipoprotein L6	474.608373331603	0.718183017808952	3.87730521889943e-09
ENSG00000143321	3068	HDGF	heparin binding growth factor	3401.38472145703	-0.404534978351195	3.88054148739871e-09
ENSG00000076003	4175	MCM6	minichromosome maintenance complex component 6	2660.07527073104	-0.356692392620731	4.03928523217224e-09
ENSG00000145476	285440	CYP4V2	cytochrome P450 family 4 subfamily V member 2	647.936034124613	0.589209040427262	4.04950919484987e-09
ENSG00000145431	56034	PDGFC	platelet derived growth factor C	173.97825114407	-0.956395898855061	4.12859280203624e-09
ENSG00000112146	26268	FBXO9	F-box protein 9	856.429090255107	-0.480951732382463	4.16437191120867e-09
ENSG00000131941	85415	RHPN2	rhophilin Rho GTPase binding protein 2	162.047711444892	-0.992963339991922	4.18563625680889e-09
ENSG00000137441	83888	FGFBP2	fibroblast growth factor binding protein 2	129.753905380422	1.2343160194091	4.23754109082387e-09
ENSG00000144579	58190	CTDSP1	CTD small phosphatase 1	933.679259042098	0.483322443986908	4.30129440238259e-09
ENSG00000116991	57568	SIPA1L2	signal induced proliferation associated 1 like 2	2194.18272308098	0.386934416870832	4.44362119958726e-09
ENSG00000113300	57472	CNOT6	CCR4-NOT transcription complex subunit 6	685.415352631265	-0.524986531293165	4.48354311382527e-09
ENSG00000186871	54821	ERCC6L	ERCC excision repair 6 like, spindle assembly checkpoint helicase	344.947128224238	-0.702893355838505	4.50848457714616e-09
ENSG00000102312	64840	PORCN	porcupine O-acyltransferase	216.308781542134	-0.867048733351099	4.51148952210522e-09
ENSG00000156970	701	BUB1B	BUB1 mitotic checkpoint serine/threonine kinase B	1190.51913493439	-0.430565732992277	4.56317952515577e-09
ENSG00000071539	9319	TRIP13	thyroid hormone receptor interactor 13	566.832165856167	-0.579403133008796	4.57865681389307e-09
ENSG00000092199	3183	HNRNPC	heterogeneous nuclear ribonucleoprotein C (C1/C2)	3395.57423504972	-0.348475988277436	4.64652391696263e-09
ENSG00000161791	91010	FMNL3	formin like 3	766.545504222764	-0.510310355522259	4.74396422925525e-09
ENSG00000204186	57683	ZDBF2	zinc finger DBF-type containing 2	368.830325422998	0.717351651398671	4.83062667757544e-09
ENSG00000072682	8974	P4HA2	prolyl 4-hydroxylase subunit alpha 2	1614.05886607898	0.416648339444732	5.01697234874648e-09
ENSG00000105939	56829	ZC3HAV1	zinc finger CCCH-type containing, antiviral 1	1092.92195340721	0.470001610809434	5.07577930860829e-09
ENSG00000198056	5557	PRIM1	DNA primase subunit 1	356.816505826412	-0.690794600389624	5.07577930860829e-09
ENSG00000188488	5104	SERPINA5	serpin family A member 5	159.462677562859	-1.03700757100799	5.08911023855004e-09
ENSG00000066279	259266	ASPM	abnormal spindle microtubule assembly	2586.27674799938	-0.380044470347425	5.17872052725696e-09
ENSG00000145687	23635	SSBP2	single stranded DNA binding protein 2	250.188954335317	-0.817242188252451	5.26223293173508e-09
ENSG00000071189	23161	SNX13	sorting nexin 13	1193.16662357408	-0.429430410479409	5.29957158230948e-09
ENSG00000163655	8833	GMPS	guanine monophosphate synthase	1163.92258501359	-0.456620930393546	5.43325306840336e-09
ENSG00000153071	1601	DAB2	DAB2, clathrin adaptor protein	420.263529911577	0.714361752353485	5.46122771130505e-09
ENSG00000176444	1196	CLK2	CDC like kinase 2	662.881151924468	0.698714034730641	5.49638519540154e-09
ENSG00000180998	283554	GPR137C	G protein-coupled receptor 137C	124.695397645018	-1.1520608934566	5.51945002603398e-09
ENSG00000132718	23208	SYT11	synaptotagmin 11	1200.06087121316	-0.451483092881375	5.62934621155615e-09
ENSG00000184979	11274	USP18	ubiquitin specific peptidase 18	86.8020957924873	1.68592862030872	5.77932119274187e-09
ENSG00000173846	1263	PLK3	polo like kinase 3	77.5497669373208	1.62335525482051	5.8314996395449e-09
ENSG00000118322	23120	ATP10B	ATPase phospholipid transporting 10B (putative)	188.300076633297	-0.917834174950506	5.84007747343141e-09
ENSG00000153162	654	BMP6	bone morphogenetic protein 6	44.9721924499749	2.54020981768277	5.85177599714601e-09
ENSG00000084774	790	CAD	carbamoyl-phosphate synthetase 2, aspartate transcarbamylase, and dihydroorotase	1712.53549654869	0.452362721644521	6.09243681849959e-09
ENSG00000106144	835	CASP2	caspase 2	899.790098720871	-0.496972644632983	6.20906910441241e-09
ENSG00000111639	51258	MRPL51	mitochondrial ribosomal protein L51	1213.21273689461	-0.46295893761786	6.24484005154587e-09
ENSG00000197122	6714	SRC	SRC proto-oncogene, non-receptor tyrosine kinase	554.030723094803	0.586785977289595	6.27520521310266e-09
ENSG00000135069	29968	PSAT1	phosphoserine aminotransferase 1	1023.24688443556	0.521764999462766	6.28899534990267e-09
ENSG00000104980	10469	TIMM44	translocase of inner mitochondrial membrane 44	352.824077740406	0.749873936703976	6.62085629487879e-09
ENSG00000168175	93487	MAPK1IP1L	mitogen-activated protein kinase 1 interacting protein 1 like	1215.98776730601	-0.419210481001491	6.66900269464024e-09
ENSG00000082898	7514	XPO1	exportin 1	4453.13401042583	-0.295083588635246	6.68524883311134e-09
ENSG00000179335	1198	CLK3	CDC like kinase 3	625.359364897381	0.586985541094503	6.72575904324874e-09
ENSG00000115935	7456	WIPF1	WAS/WASL interacting protein family member 1	1250.40881128764	-0.439002635725818	6.74286845579716e-09
ENSG00000033100	54480	CHPF2	chondroitin polymerizing factor 2	1033.34160942176	0.473238983674216	6.85749405104399e-09
ENSG00000167657	1613	DAPK3	death associated protein kinase 3	388.727448365098	0.702751506789807	7.01243948877303e-09
ENSG00000137273	2295	FOXF2	forkhead box F2	73.9403497175576	1.66190127129742	7.0374096318464e-09
ENSG00000177054	54503	ZDHHC13	zinc finger DHHC-type containing 13	326.332011342896	-0.702006153958362	7.03762286851633e-09
ENSG00000119397	11064	CNTRL	centriolin	326.893223509322	-0.705865660531329	7.11834250099924e-09
ENSG00000181826	768211	RELL1	RELT like 1	148.61621235876	-1.01888521924538	7.21024071559655e-09
ENSG00000188643	140576	S100A16	S100 calcium binding protein A16	1113.86460930084	-0.505774254986114	7.21688901978789e-09
ENSG00000138646	51191	HERC5	HECT and RLD domain containing E3 ubiquitin protein ligase 5	360.178174358542	0.820471134407705	7.2671297817829e-09
ENSG00000158792	124044	SPATA2L	spermatogenesis associated 2 like	166.974584336959	1.08642541908844	7.548431615495e-09
ENSG00000104881	10848	PPP1R13L	protein phosphatase 1 regulatory subunit 13 like	97.0103447906983	1.62602089042125	7.72567748964642e-09
ENSG00000198899	4508	ATP6	ATP synthase F0 subunit 6	14370.2616032821	-1.1432035931033	7.72567748964642e-09
ENSG00000130723	84726	PRRC2B	proline rich coiled-coil 2B	1803.6999795529	0.380802268174615	7.78208109285272e-09
ENSG00000182095	84629	TNRC18	trinucleotide repeat containing 18	2086.84066290709	0.366121366000466	8.01290311945803e-09
ENSG00000127920	2791	GNG11	G protein subunit gamma 11	719.516979681848	-0.540913243244399	8.05191555337558e-09
ENSG00000257923	1523	CUX1	cut like homeobox 1	1457.40773874971	0.422622557792301	8.17624327638659e-09
ENSG00000185627	5719	PSMD13	proteasome 26S subunit, non-ATPase 13	1510.83456633132	-0.398246510178527	8.17950747585636e-09
ENSG00000152465	9397	NMT2	N-myristoyltransferase 2	124.748009034582	-1.09028749954631	8.19990001122968e-09
ENSG00000151929	9531	BAG3	BCL2 associated athanogene 3	650.086052417376	0.556707602081108	8.36287163113806e-09
ENSG00000116191	55103	RALGPS2	Ral GEF with PH domain and SH3 binding motif 2	408.556832697256	0.699681806483557	8.39387858383386e-09
ENSG00000122642	11328	FKBP9	FK506 binding protein 9	3266.05506557743	0.359628350597694	8.57231043535645e-09
ENSG00000136731	56886	UGGT1	UDP-glucose glycoprotein glucosyltransferase 1	2734.26500161156	-0.349903906081905	8.59699245328035e-09
ENSG00000118705	6185	RPN2	ribophorin II	8101.27418526228	-0.34421356989888	8.63062953109806e-09
ENSG00000182093	7485	WRB	tryptophan rich basic protein	469.628273934607	-0.609795498895855	8.79343242339664e-09
ENSG00000145604	6502	SKP2	S-phase kinase associated protein 2	485.072042137806	-0.630143371456636	9.28707401931402e-09
ENSG00000196205	158078	EEF1A1P5	Eukaryotic Translation Elongation Factor 1 Alpha 1 Pseudogene 5	75.2761964105349	1.74071399188843	9.30097171172862e-09
ENSG00000232573	326307	RPL3P4	Ribosomal Protein L3 Pseudogene 4	56.6598419450783	2.03357713147531	9.30097171172862e-09
ENSG00000143614	57459	GATAD2B	GATA zinc finger domain containing 2B	774.019762108846	-0.492348785580606	9.39081670520589e-09
ENSG00000196715	154807	VKORC1L1	vitamin K epoxide reductase complex subunit 1 like 1	1130.68980734993	-0.435902086921405	9.42265064532475e-09
ENSG00000101868	5422	POLA1	DNA polymerase alpha 1, catalytic subunit	458.266323234279	-0.619877548478884	9.60529356723434e-09
ENSG00000085719	8895	CPNE3	copine 3	1692.50706152558	-0.381875560534745	1.00218318310734e-08
ENSG00000152240	115106	HAUS1	HAUS augmin like complex subunit 1	404.071539471461	-0.666973874423242	1.01114261570929e-08
ENSG00000074696	51495	HACD3	3-hydroxyacyl-CoA dehydratase 3	1715.85529403496	-0.396490716021106	1.0174627687529e-08
ENSG00000078098	2191	FAP	fibroblast activation protein alpha	433.875983635511	0.666519196850985	1.03059393328717e-08
ENSG00000102753	3839	KPNA3	karyopherin subunit alpha 3	979.306044612439	-0.449499131265507	1.03673428167954e-08
ENSG00000169100	293	SLC25A6	solute carrier family 25 member 6	2967.52588351564	0.431858694383716	1.05095892524384e-08
ENSG00000179406	285908	LINC00174	long intergenic non-protein coding RNA 174	237.008318346963	0.924916132542469	1.0607739075903e-08
ENSG00000122729	48	ACO1	aconitase 1	680.487509464129	-0.544808950194606	1.06226373403756e-08
ENSG00000091140	1738	DLD	dihydrolipoamide dehydrogenase	1790.28669814977	-0.398221305783654	1.08288433989038e-08
ENSG00000061938	10188	TNK2	tyrosine kinase non receptor 2	431.946283599133	0.688042217029189	1.11782018024274e-08
ENSG00000144560	9686	VGLL4	vestigial like family member 4	1110.22263571698	-0.431318277819701	1.12618253947058e-08
ENSG00000172638	30008	EFEMP2	EGF containing fibulin extracellular matrix protein 2	404.811218938918	0.727595630641639	1.1279355665815e-08
ENSG00000173638	6573	SLC19A1	solute carrier family 19 member 1	390.047983257162	0.678825900792468	1.12854356974194e-08
ENSG00000171067	53838	C11orf24	chromosome 11 open reading frame 24	2458.89620640468	0.346214609865229	1.13883452847423e-08
ENSG00000100605	3705	ITPK1	inositol-tetrakisphosphate 1-kinase	1824.49579487163	-0.369599443375566	1.16329649565343e-08
ENSG00000122678	27434	POLM	DNA polymerase mu	267.951164235401	0.940806547719684	1.17480365508819e-08
ENSG00000116473	5906	RAP1A	RAP1A, member of RAS oncogene family	1187.62984992587	-0.42101150139115	1.18852600653403e-08
ENSG00000213390	84986	ARHGAP19	Rho GTPase activating protein 19	255.854562139546	-0.780537211890705	1.21438951386177e-08
ENSG00000185163	317781	DDX51	DEAD-box helicase 51	334.648065793006	0.769352709588682	1.21676036468991e-08
ENSG00000228300	55009	C19orf24	chromosome 19 open reading frame 24	421.882395222278	0.683788275993299	1.26214782762245e-08
ENSG00000166508	4176	MCM7	minichromosome maintenance complex component 7	3876.71941059234	-0.338947507930188	1.26224326411289e-08
ENSG00000101158	51497	NELFCD	negative elongation factor complex member C/D	1519.17108808162	-0.408150697485325	1.26331197723262e-08
ENSG00000166900	6809	STX3	syntaxin 3	516.075335054194	0.63051443997556	1.26474242356171e-08
ENSG00000051825	10198	MPHOSPH9	M-phase phosphoprotein 9	690.621954260362	-0.511900420869643	1.28167328305076e-08
ENSG00000166164	29117	BRD7	bromodomain containing 7	746.596881068791	-0.492348404061531	1.28167328305076e-08
ENSG00000135414	10220	GDF11	growth differentiation factor 11	850.482895312962	-0.483389734510867	1.30857867450434e-08
ENSG00000178498	196403	DTX3	deltex E3 ubiquitin ligase 3	325.2078064175	0.819833865418762	1.30857867450434e-08
ENSG00000012124	933	CD22	CD22 molecule	139.845323059422	-1.03529169813593	1.33219128303011e-08
ENSG00000170919	100190939	TPT1-AS1	TPT1 Antisense RNA 1	93.8403590604255	1.47705287638843	1.33961032500285e-08
ENSG00000182168	8633	UNC5C	unc-5 netrin receptor C	286.457276811222	-0.740222211098646	1.35613974688445e-08
ENSG00000165480	221150	SKA3	spindle and kinetochore associated complex subunit 3	448.396392725319	-0.6595147343443	1.36670908462293e-08
ENSG00000205356	25851	TECPR1	tectonin beta-propeller repeat containing 1	592.180548179996	0.589099396946148	1.37011045940385e-08
ENSG00000170144	220988	HNRNPA3	heterogeneous nuclear ribonucleoprotein A3	2522.66185893667	0.37950973757397	1.37861213151717e-08
ENSG00000189266	55629	PNRC2	proline rich nuclear receptor coactivator 2	781.848621589839	-0.503352570811673	1.3833178617854e-08
ENSG00000198925	79065	ATG9A	autophagy related 9A	1446.69331519293	0.427707155869003	1.38757356490731e-08
ENSG00000067082	1316	KLF6	Kruppel like factor 6	1146.27822274353	-0.629759289636327	1.44034299894208e-08
ENSG00000184497	348013	TMEM255B	transmembrane protein 255B	43.4577776751073	2.61469470610666	1.4607791882865e-08
ENSG00000116871	55700	MAP7D1	MAP7 domain containing 1	1818.24786269665	0.377995027983226	1.46753978569886e-08
ENSG00000108953	7531	YWHAE	tyrosine 3-monooxygenase/tryptophan 5-monooxygenase activation protein epsilon	4811.85046348423	-0.372300309285824	1.46916934990389e-08
ENSG00000146067	54540	FAM193B	family with sequence similarity 193 member B	236.94638851795	0.912846784433564	1.46916934990389e-08
ENSG00000181104	2149	F2R	coagulation factor II thrombin receptor	1341.06104850802	0.439682940639092	1.47269444494062e-08
ENSG00000147100	6567	SLC16A2	solute carrier family 16 member 2	150.438218070855	-0.988576199311626	1.47359419076117e-08
ENSG00000165030	4783	NFIL3	nuclear factor, interleukin 3 regulated	145.315913856696	1.11105992597418	1.47638746812657e-08
ENSG00000166503	50810	HDGFL3	HDGF like 3	1106.85086227527	-0.460918265495377	1.47638746812657e-08
ENSG00000168453	55806	HR	HR, lysine demethylase and nuclear receptor corepressor	1538.12838612145	-0.382883881684006	1.47638746812657e-08
ENSG00000066117	6602	SMARCD1	SWI/SNF related, matrix associated, actin dependent regulator of chromatin, subfamily d, member 1	1977.20996988107	-0.354293134917753	1.48942057569347e-08
ENSG00000163605	151987	PPP4R2	protein phosphatase 4 regulatory subunit 2	1012.95394595331	-0.452371796864351	1.49753498644654e-08
ENSG00000081479	4036	LRP2	LDL receptor related protein 2	233.888649576146	0.914691033342425	1.51780798432281e-08
ENSG00000226608	284764	FTLP3	Ferritin Light Chain Pseudogene 3	44.1150270688055	2.4044683207991	1.52870689022609e-08
ENSG00000013364	9961	MVP	major vault protein	802.069229964957	0.526431618684222	1.54326730410859e-08
ENSG00000231925	6892	TAPBP	TAP binding protein	2123.54188336609	-0.359117099983667	1.55909933495159e-08
ENSG00000157540	1859	DYRK1A	dual specificity tyrosine phosphorylation regulated kinase 1A	729.141882480162	-0.51458214602576	1.59098590976344e-08
ENSG00000171045	203062	TSNARE1	t-SNARE domain containing 1	65.6884709948609	1.76236341225142	1.59365005724239e-08
ENSG00000186660	80829	ZFP91	ZFP91 zinc finger protein	1952.39644109732	-0.399114478966298	1.63285898835098e-08
ENSG00000066044	1994	ELAVL1	ELAV like RNA binding protein 1	1353.97167710845	-0.415894083567692	1.65232064221324e-08
ENSG00000055130	8454	CUL1	cullin 1	1353.40998668943	-0.397054014507336	1.65591184177788e-08
ENSG00000215301	1654	DDX3X	DEAD-box helicase 3, X-linked	5803.76400764221	-0.288174511622987	1.67606491556021e-08
ENSG00000223749	84848	MIR503HG	MIR503 host gene	96.4979497312505	1.73499569211425	1.7308482014326e-08
ENSG00000157985	116987	AGAP1	ArfGAP with GTPase domain, ankyrin repeat and PH domain 1	652.402819398644	0.553570299709198	1.76675176053305e-08
ENSG00000115649	27013	CNPPD1	cyclin Pas1/PHO80 domain containing 1	476.309948385369	0.639252428237359	1.77586259785781e-08
ENSG00000187605	200424	TET3	tet methylcytosine dioxygenase 3	528.108155181871	0.623521514550022	1.8435811619758e-08
ENSG00000168807	6645	SNTB2	syntrophin beta 2	575.615567812011	-0.554474147755802	1.88276362221112e-08
ENSG00000166562	90701	SEC11C	SEC11 homolog C, signal peptidase complex subunit	562.074820111697	0.594148276573199	1.90554248192969e-08
ENSG00000116132	5396	PRRX1	paired related homeobox 1	1324.57294601298	-0.401621384692205	1.95518386900034e-08
ENSG00000204248	1302	COL11A2	collagen type XI alpha 2 chain	523.225273842054	-0.73736352722531	1.96486834249695e-08
ENSG00000128731	8924	HERC2	HECT and RLD domain containing E3 ubiquitin protein ligase 2	1379.3991379113	0.424167720679606	1.97097048049377e-08
ENSG00000011304	5725	PTBP1	polypyrimidine tract binding protein 1	4033.78532223545	0.293354793407629	1.97131138282682e-08
ENSG00000138867	83606	GUCD1	guanylyl cyclase domain containing 1	1853.94855118341	-0.375935311257245	1.99334638303813e-08
ENSG00000123416	10376	TUBA1B	tubulin alpha 1b	4723.97578993338	-0.327741817920727	1.9970076936506e-08
ENSG00000162892	11009	IL24	interleukin 24	31.7117872884687	3.52650597288196	1.9985141055404e-08
ENSG00000143149	223	ALDH9A1	aldehyde dehydrogenase 9 family member A1	1173.55599339877	-0.431614957679928	2.01802389616499e-08
ENSG00000111199	59341	TRPV4	transient receptor potential cation channel subfamily V member 4	210.495233414685	-0.848177433449375	2.03718076794701e-08
ENSG00000128944	90417	KNSTRN	kinetochore localized astrin (SPAG5) binding protein	651.337455007532	-0.533157647359613	2.04311752817367e-08
ENSG00000108984	5608	MAP2K6	mitogen-activated protein kinase kinase 6	192.547298332693	-0.907770912052869	2.05641617772621e-08
ENSG00000172115	54205	CYCS	cytochrome c, somatic	2598.51884004623	-0.369988697416834	2.0675231079541e-08
ENSG00000173120	22992	KDM2A	lysine demethylase 2A	1553.02764167093	0.384812319263344	2.07670796755401e-08
ENSG00000026559	3755	KCNG1	potassium voltage-gated channel modifier subfamily G member 1	284.113109452317	0.808798562572202	2.07965577136921e-08
ENSG00000213672	51517	NCKIPSD	NCK interacting protein with SH3 domain	282.28068223129	0.837532794851793	2.08842504162514e-08
ENSG00000109099	5376	PMP22	peripheral myelin protein 22	3795.00937459962	0.343471710205992	2.09405627970139e-08
ENSG00000078124	55331	ACER3	alkaline ceramidase 3	635.696502718003	-0.541315906906095	2.13467169840922e-08
ENSG00000139350	121441	NEDD1	neural precursor cell expressed, developmentally down-regulated 1	537.166234592926	-0.573091250868314	2.16158117618758e-08
ENSG00000160957	9401	RECQL4	RecQ like helicase 4	1119.53762627788	0.449328248768479	2.25366592523359e-08
ENSG00000143158	25874	MPC2	mitochondrial pyruvate carrier 2	457.030229114877	-0.64531615757089	2.26498781903721e-08
ENSG00000123219	64105	CENPK	centromere protein K	601.918239322668	-0.559586899981001	2.28449321512603e-08
ENSG00000134970	51014	TMED7	transmembrane p24 trafficking protein 7	2055.77177338615	-0.398879110291	2.28477504533493e-08
ENSG00000167994	5866	RAB3IL1	RAB3A interacting protein like 1	159.284982409604	1.05108164636389	2.28477504533493e-08
ENSG00000105726	57130	ATP13A1	ATPase 13A1	881.564540784106	0.468072478528162	2.32566521298238e-08
ENSG00000105894	5764	PTN	pleiotrophin	2881.90380399812	-0.362028451470538	2.34905266923998e-08
ENSG00000204120	26058	GIGYF2	GRB10 interacting GYF protein 2	1328.41590425318	0.413447832219396	2.34905266923998e-08
ENSG00000139211	347902	AMIGO2	adhesion molecule with Ig like domain 2	89.088957954054	-1.25726920235891	2.36941121109314e-08
ENSG00000068078	2261	FGFR3	fibroblast growth factor receptor 3	37.5120043347189	-1.9801700824806	2.37016387916574e-08
ENSG00000150459	10284	SAP18	Sin3A associated protein 18	866.949087585497	-0.488643810122896	2.37480930378964e-08
ENSG00000133275	1455	CSNK1G2	casein kinase 1 gamma 2	776.419523417552	0.491721452359781	2.39130245438625e-08
ENSG00000197136	399909	PCNX3	pecanex homolog 3	1742.86674726949	0.419890071975245	2.42779000582178e-08
ENSG00000005483	55904	KMT2E	lysine methyltransferase 2E	1539.36981322679	0.400562777381306	2.42889250844456e-08
ENSG00000172936	4615	MYD88	myeloid differentiation primary response 88	676.468873052944	0.544574194013567	2.45191920116076e-08
ENSG00000176871	55884	WSB2	WD repeat and SOCS box containing 2	1531.58409741269	-0.437971834470357	2.46791595113649e-08
ENSG00000142892	10026	PIGK	phosphatidylinositol glycan anchor biosynthesis class K	1207.46835522356	-0.41370714472181	2.47672630063384e-08
ENSG00000110900	441631	TSPAN11	tetraspanin 11	378.609045401349	0.671341147564251	2.48193713518462e-08
ENSG00000166147	2200	FBN1	fibrillin 1	1947.67435263584	-0.356263496287067	2.48193713518462e-08
ENSG00000167881	6730	SRP68	signal recognition particle 68	2574.47107621798	-0.332523430358119	2.49354915134728e-08
ENSG00000100968	4776	NFATC4	nuclear factor of activated T cells 4	293.374761171427	0.907198909992509	2.49757536522724e-08
ENSG00000134686	1912	PHC2	polyhomeotic homolog 2	1630.54555404658	-0.392275218645813	2.51054589070049e-08
ENSG00000005249	5577	PRKAR2B	protein kinase cAMP-dependent type II regulatory subunit beta	650.371031176148	-0.602593116489895	2.56786891153163e-08
ENSG00000112139	266727	MDGA1	MAM domain containing glycosylphosphatidylinositol anchor 1	131.099410563541	1.19876194709793	2.60601871955378e-08
ENSG00000060069	9150	CTDP1	CTD phosphatase subunit 1	478.454572751924	0.606644333186538	2.64907778133621e-08
ENSG00000111846	2651	GCNT2	glucosaminyl (N-acetyl) transferase 2 (I blood group)	101.106059439924	1.32222496927233	2.64907778133621e-08
ENSG00000134323	4613	MYCN	MYCN proto-oncogene, bHLH transcription factor	28.0584935620452	-2.39265683712762	2.66428462028707e-08
ENSG00000147065	4478	MSN	moesin	5516.01137944886	-0.297264301994578	2.6694559365739e-08
ENSG00000103942	9455	HOMER2	homer scaffold protein 2	194.735862789964	-0.868475152670843	2.67788331717524e-08
ENSG00000172046	10869	USP19	ubiquitin specific peptidase 19	1072.65518608623	0.467906663012505	2.67823173735278e-08
ENSG00000197852	55924	FAM212B	family with sequence similarity 212 member B	2002.82155262219	-0.38417585106592	2.68786393495172e-08
ENSG00000127415	3425	IDUA	iduronidase, alpha-L-	105.478721726997	1.32078093770536	2.74061591641573e-08
ENSG00000115129	9540	TP53I3	tumor protein p53 inducible protein 3	241.837704553922	-0.780505992984367	2.79782951239492e-08
ENSG00000161057	5701	PSMC2	proteasome 26S subunit, ATPase 2	2513.56983654012	-0.384132632733242	2.80912646918225e-08
ENSG00000156261	10694	CCT8	chaperonin containing TCP1 subunit 8	3203.21183423756	-0.346451073593092	2.82321424545083e-08
ENSG00000198171	65992	DDRGK1	DDRGK domain containing 1	820.857371337684	0.531107059570733	2.90892851559188e-08
ENSG00000198198	23334	SZT2	SZT2, KICSTOR complex subunit	575.620298008304	0.752242197780173	2.95447539454342e-08
ENSG00000214063	7106	TSPAN4	tetraspanin 4	720.067549855901	0.570208381330482	3.03554182510169e-08
ENSG00000138443	10152	ABI2	abl interactor 2	2092.60944225282	-0.338758690466173	3.04663466633573e-08
ENSG00000075142	6717	SRI	sorcin	1307.01127967697	-0.441016562030393	3.06259527471353e-08
ENSG00000109111	6830	SUPT6H	SPT6 homolog, histone chaperone	2232.34184003531	0.36342742142527	3.07672169787941e-08
ENSG00000095319	23511	NUP188	nucleoporin 188	1674.59168979439	-0.361202198531013	3.22461509911758e-08
ENSG00000138698	5910	RAP1GDS1	Rap1 GTPase-GDP dissociation stimulator 1	564.427311716489	-0.548334756113446	3.24266951205531e-08
ENSG00000134324	23175	LPIN1	lipin 1	754.248911691551	-0.47675093430542	3.24314109622855e-08
ENSG00000183117	64478	CSMD1	CUB and Sushi multiple domains 1	37.6896291947677	2.5850007518473	3.26784820992119e-08
ENSG00000167526	6137	RPL13	ribosomal protein L13	5862.47023396302	0.379708281334109	3.27962976770646e-08
ENSG00000137942	54874	FNBP1L	formin binding protein 1 like	700.952779816543	-0.531744149964462	3.32480600745161e-08
ENSG00000063169	29998	BICRA	BRD4 interacting chromatin remodeling complex associated protein	243.926174800897	0.899705327935329	3.36996850711314e-08
ENSG00000141380	6760	SS18	SS18, nBAF chromatin remodeling complex subunit	1094.28134602492	-0.417940129607163	3.51792253605595e-08
ENSG00000115902	6509	SLC1A4	solute carrier family 1 member 4	9478.61990096376	0.280172163212044	3.54561368439732e-08
ENSG00000163781	11073	TOPBP1	DNA topoisomerase II binding protein 1	1434.50502503227	-0.380809011149267	3.57114483683867e-08
ENSG00000232434	389813	AJM1	apical junction component 1 homolog	106.746487753113	1.33648588273285	3.66192472426846e-08
ENSG00000107404	1855	DVL1	dishevelled segment polarity protein 1	485.089237913857	0.614039538602889	3.75704958757765e-08
ENSG00000131153	51659	GINS2	GINS complex subunit 2	793.793244689628	-0.5086621743516	3.75704958757765e-08
ENSG00000236552	728658	RPL13AP5	ribosomal protein L13a pseudogene 5	30.971522992101	3.48125221954978	3.80042521287106e-08
ENSG00000161638	3678	ITGA5	integrin subunit alpha 5	2369.79082859616	0.340550729205418	3.81860145995309e-08
ENSG00000173575	1106	CHD2	chromodomain helicase DNA binding protein 2	811.009908780913	0.530212075645895	3.85318814855906e-08
ENSG00000166803	9768	PCLAF	PCNA clamp associated factor	443.039258603523	-0.650316194113464	3.85571963447787e-08
ENSG00000129128	60559	SPCS3	signal peptidase complex subunit 3	1402.94817139113	-0.393829185159799	3.87426895258874e-08
ENSG00000101191	11083	DIDO1	death inducer-obliterator 1	1661.99840359181	0.394994098947403	3.91133858393256e-08
ENSG00000091136	3912	LAMB1	laminin subunit beta 1	6824.10320687307	-0.268593115929395	3.94130895874444e-08
ENSG00000169116	25849	PARM1	prostate androgen-regulated mucin-like protein 1	96.0101556124195	-1.19739013808162	3.98449554873864e-08
ENSG00000108848	51747	LUC7L3	LUC7 like 3 pre-mRNA splicing factor	1936.09010284064	0.540925677240159	4.04388810808883e-08
ENSG00000164040	10424	PGRMC2	progesterone receptor membrane component 2	813.484307675842	0.482211335231993	4.06696832731619e-08
ENSG00000173110	3310	HSPA6	heat shock protein family A (Hsp70) member 6	78.7186460008259	1.52117227534256	4.08516495375892e-08
ENSG00000183010	5831	PYCR1	pyrroline-5-carboxylate reductase 1	849.668343635971	0.529896853422619	4.08516495375892e-08
ENSG00000196235	6829	SUPT5H	SPT5 homolog, DSIF elongation factor subunit	1551.66380312876	0.407543386399808	4.15127686959023e-08
ENSG00000166471	440026	TMEM41B	transmembrane protein 41B	330.316350184487	-0.665646180892907	4.18243807941495e-08
ENSG00000128596	64753	CCDC136	coiled-coil domain containing 136	170.916801100975	1.05548110937201	4.19219093235709e-08
ENSG00000144118	5899	RALB	RAS like proto-oncogene B	742.398332972873	-0.524413916617145	4.19219093235709e-08
ENSG00000062524	4058	LTK	leukocyte receptor tyrosine kinase	38.7639340683587	2.53365921293796	4.28863034695501e-08
ENSG00000141179	58488	PCTP	phosphatidylcholine transfer protein	507.395708917486	-0.606107872501328	4.34337913457579e-08
ENSG00000170515	5036	PA2G4	proliferation-associated 2G4	2366.67151714462	-0.371003057488643	4.39220169960456e-08
ENSG00000125450	79902	NUP85	nucleoporin 85	907.154968248159	-0.47121986247047	4.47149123150476e-08
ENSG00000171320	157570	ESCO2	establishment of sister chromatid cohesion N-acetyltransferase 2	424.82302003764	-0.603830391473537	4.55897563674518e-08
ENSG00000185722	51479	ANKFY1	ankyrin repeat and FYVE domain containing 1	813.658388647085	0.524874041565445	4.57203316426091e-08
ENSG00000133619	84626	KRBA1	KRAB-A domain containing 1	230.858452317856	0.843298883893248	4.58806065492677e-08
ENSG00000196313	9883	POM121	POM121 transmembrane nucleoporin	620.725302006622	0.53203434352918	4.69364042510372e-08
ENSG00000214654	100288842	B3GNT10	UDP-GlcNAc:BetaGal Beta-1,3-N-Acetylglucosaminyltransferase 10 (Putative)	69.0190891916097	-1.45636771329446	4.72304694795044e-08
ENSG00000175866	10458	BAIAP2	BAI1 associated protein 2	873.663925000057	0.463238905302281	4.78926509776255e-08
ENSG00000156735	9530	BAG4	BCL2 associated athanogene 4	284.770414095898	-0.710595559725164	4.81139160994009e-08
ENSG00000144744	9039	UBA3	ubiquitin like modifier activating enzyme 3	784.206652014526	-0.462728618776045	4.81635463982044e-08
ENSG00000164291	153642	ARSK	arylsulfatase family member K	198.863810933674	-0.851304663548917	4.85809865704753e-08
ENSG00000185634	399694	SHC4	SHC adaptor protein 4	426.577335308099	-0.605940653774364	4.87494999762051e-08
ENSG00000204054	100506190	LINC00963	Long Intergenic Non-Protein Coding RNA 963	1009.25784273104	0.463321523678561	4.88244993655151e-08
ENSG00000171658	344887	NMRAL2P	NmrA like redox sensor 2, pseudogene	34.27951870595	2.87656466424844	4.98413661396602e-08
ENSG00000165684	6621	SNAPC4	small nuclear RNA activating complex polypeptide 4	243.270670303084	0.822886308875887	5.03662143197617e-08
ENSG00000160072	83858	ATAD3B	ATPase family, AAA domain containing 3B	402.601829497692	0.722144922560329	5.06489162215771e-08
ENSG00000008256	9265	CYTH3	cytohesin 3	921.631121245442	0.453948356256038	5.10405303784549e-08
ENSG00000244509	27350	APOBEC3C	apolipoprotein B mRNA editing enzyme catalytic subunit 3C	814.953951612715	-0.480208353318203	5.16184550201846e-08
ENSG00000106348	3614	IMPDH1	inosine monophosphate dehydrogenase 1	1052.84843824821	0.431233775586002	5.19743558392396e-08
ENSG00000100058	1416	CRYBB2P1	crystallin beta B2 pseudogene 1	162.047507569419	1.0092940281061	5.2906573180722e-08
ENSG00000141577	22994	CEP131	centrosomal protein 131	736.680552559377	0.555547772100654	5.3176910623609e-08
ENSG00000147403	6134	RPL10	ribosomal protein L10	5174.88955752149	0.304687788083538	5.31789128179786e-08
ENSG00000145147	9353	SLIT2	slit guidance ligand 2	242.792469946312	-0.756120054555586	5.34488367167279e-08
ENSG00000172061	131578	LRRC15	leucine rich repeat containing 15	132.388502791464	-1.0405128739656	5.39576589632934e-08
ENSG00000101557	9097	USP14	ubiquitin specific peptidase 14	1275.94324818224	-0.430309275520205	5.52281508496779e-08
ENSG00000144278	114805	GALNT13	polypeptide N-acetylgalactosaminyltransferase 13	248.958767416269	-0.765089171563023	5.53342416814209e-08
ENSG00000215030	388344	RPL13P12	Ribosomal Protein L13 Pseudogene 12	41.9722135583762	2.3193289511867	5.62097804002882e-08
ENSG00000143801	5664	PSEN2	presenilin 2	292.136248137453	0.75151590177638	5.64711668483789e-08
ENSG00000116809	7709	ZBTB17	zinc finger and BTB domain containing 17	297.44737796308	0.740541710674167	5.66047010983341e-08
ENSG00000143493	25896	INTS7	integrator complex subunit 7	657.849617059807	-0.526008046163639	5.74597640174988e-08
ENSG00000100234	7078	TIMP3	TIMP metallopeptidase inhibitor 3	27124.8649175733	0.264574723615678	5.76062535455927e-08
ENSG00000198873	2869	GRK5	G protein-coupled receptor kinase 5	377.74609732845	-0.62456989906685	5.77054665443421e-08
ENSG00000176225	25914	RTTN	rotatin	537.852668697954	-0.57518109115369	5.82408443691363e-08
ENSG00000113583	56951	C5orf15	chromosome 5 open reading frame 15	2392.29299859661	-0.344237418563651	5.82534213828136e-08
ENSG00000275023	4302	MLLT6	MLLT6, PHD finger containing	1125.88707276592	0.477081270481822	6.02419949929592e-08
ENSG00000172379	9915	ARNT2	aryl hydrocarbon receptor nuclear translocator 2	887.120485579313	-0.45115615631881	6.11950157404329e-08
ENSG00000121644	51029	DESI2	desumoylating isopeptidase 2	1104.93614777296	-0.453701327909097	6.22705472634795e-08
ENSG00000122482	84146	ZNF644	zinc finger protein 644	797.436818645648	-0.469510176783874	6.23277865924889e-08
ENSG00000077549	832	CAPZB	capping actin protein of muscle Z-line beta subunit	1655.96389165705	-0.421420256230639	6.34272931501661e-08
ENSG00000114405	57415	C3orf14	chromosome 3 open reading frame 14	190.299555133299	-0.851124275762931	6.39362215267222e-08
ENSG00000272556	101929008	GTF2IP13	General Transcription Factor IIi Pseudogene 13	80.2165090037914	1.66913120598277	6.39362215267222e-08
ENSG00000133131	79710	MORC4	MORC family CW-type zinc finger 4	532.516120842127	-0.536703685680536	6.4455229574476e-08
ENSG00000119969	3070	HELLS	helicase, lymphoid specific	540.253972285261	-0.578087880862306	6.49282459462212e-08
ENSG00000071243	54556	ING3	inhibitor of growth family member 3	287.730298025515	-0.750766906977267	6.69889167605587e-08
ENSG00000188529	10772	SRSF10	serine and arginine rich splicing factor 10	1959.58014726005	-0.370789007469467	6.76724211799623e-08
ENSG00000174953	170506	DHX36	DEAH-box helicase 36	1171.13557215008	-0.405482451880979	6.85645839134956e-08
ENSG00000167280	64772	ENGASE	endo-beta-N-acetylglucosaminidase	690.971094596992	0.725436714055674	6.88515467611847e-08
ENSG00000196262	5478	PPIA	peptidylprolyl isomerase A	8120.83392423047	-0.301946155031684	6.95044070123304e-08
ENSG00000071127	9948	WDR1	WD repeat domain 1	2622.64318485452	-0.330435514369184	6.95239492105702e-08
ENSG00000010270	83930	STARD3NL	STARD3 N-terminal like	994.537487982678	-0.442813948689324	6.99030093278704e-08
ENSG00000129810	151648	SGO1	shugoshin 1	295.44682286949	-0.730086716818719	6.99030093278704e-08
ENSG00000181690	5324	PLAG1	PLAG1 zinc finger	44.6928137516093	2.15063691415363	7.03182593416727e-08
ENSG00000143545	5872	RAB13	RAB13, member RAS oncogene family	1838.27472321135	-0.401960862442691	7.04550842100552e-08
ENSG00000164683	23462	HEY1	hes related family bHLH transcription factor with YRPW motif 1	170.157038840462	-0.906258980161829	7.04550842100552e-08
ENSG00000149925	226	ALDOA	aldolase, fructose-bisphosphate A	16965.7969483794	0.284716428541458	7.09728070555156e-08
ENSG00000198729	81706	PPP1R14C	protein phosphatase 1 regulatory inhibitor subunit 14C	229.818775456758	-0.78003971891383	7.12897402214269e-08
ENSG00000165629	509	ATP5F1C	ATP synthase F1 subunit gamma	1051.01133350918	-0.447301182850928	7.1960648973353e-08
ENSG00000198919	9666	DZIP3	DAZ interacting zinc finger protein 3	245.952220087704	-0.772992944773848	7.30231830566192e-08
ENSG00000125503	54776	PPP1R12C	protein phosphatase 1 regulatory subunit 12C	662.984162425613	0.645276600775247	7.32317762825495e-08
ENSG00000182158	64764	CREB3L2	cAMP responsive element binding protein 3 like 2	1956.94720379543	0.345685779912699	7.39131565074737e-08
ENSG00000198363	444	ASPH	aspartate beta-hydroxylase	3334.69313362488	-0.32495038734713	7.52354763028281e-08
ENSG00000016864	55830	GLT8D1	glycosyltransferase 8 domain containing 1	884.07496356041	-0.441237003595577	7.53373195189609e-08
ENSG00000188706	51114	ZDHHC9	zinc finger DHHC-type containing 9	325.082752580024	0.721505349954216	7.53373195189609e-08
ENSG00000105137	85360	SYDE1	synapse defective Rho GTPase homolog 1	436.655947497858	0.725220360325281	7.54770134659706e-08
ENSG00000142731	10733	PLK4	polo like kinase 4	525.044863048693	-0.55104669125002	7.55322221374292e-08
ENSG00000105339	22898	DENND3	DENN domain containing 3	117.570661138869	1.24040872531227	7.55578227441253e-08
ENSG00000149499	256364	EML3	echinoderm microtubule associated protein like 3	838.079904832765	0.503077323133792	7.57361375700749e-08
ENSG00000128602	6608	SMO	smoothened, frizzled class receptor	833.353083630162	0.46402046640235	7.57728949688155e-08
ENSG00000143337	26092	TOR1AIP1	torsin 1A interacting protein 1	1304.05372523457	-0.416441070900649	7.60922010350902e-08
ENSG00000178538	767	CA8	carbonic anhydrase 8	42.7979124741065	2.28456986190748	7.65775583228235e-08
ENSG00000179817	117196	MRGPRX4	MAS related GPR family member X4	31.3311642959996	-2.10733792505912	7.83962043357025e-08
ENSG00000113532	7903	ST8SIA4	ST8 alpha-N-acetyl-neuraminide alpha-2,8-sialyltransferase 4	159.496263861739	-0.934575499207705	7.94543903668689e-08
ENSG00000147536	84296	GINS4	GINS complex subunit 4	404.850748394859	-0.653167402537858	7.96319671152697e-08
ENSG00000126785	57381	RHOJ	ras homolog family member J	234.610340572511	-0.840484849179276	7.99475826019793e-08
ENSG00000119471	84263	HSDL2	hydroxysteroid dehydrogenase like 2	488.888206712485	-0.588439319902159	8.13268818986129e-08
ENSG00000112964	2690	GHR	growth hormone receptor	46.8634347011611	2.1006919872128	8.13835172994787e-08
ENSG00000079691	55604	CARMIL1	capping protein regulator and myosin 1 linker 1	391.660174255602	-0.654332644301917	8.24113752440963e-08
ENSG00000103121	56942	CMC2	C-X9-C motif containing 2	625.257987149097	-0.507834444172042	8.25682539196939e-08
ENSG00000185278	84614	ZBTB37	zinc finger and BTB domain containing 37	425.76923816738	0.697921491065518	8.25682539196939e-08
ENSG00000174738	9975	NR1D2	nuclear receptor subfamily 1 group D member 2	728.354028458671	0.490493467030511	8.27530069481973e-08
ENSG00000069248	55746	NUP133	nucleoporin 133	928.863902761766	-0.435037470679798	8.32643986755079e-08
ENSG00000119392	2733	GLE1	GLE1, RNA export mediator	698.262785265458	-0.493582725308043	8.43602321764489e-08
ENSG00000150753	22948	CCT5	chaperonin containing TCP1 subunit 5	2768.35241079617	-0.343374956704121	8.44091407360563e-08
ENSG00000129055	25847	ANAPC13	anaphase promoting complex subunit 13	444.524068592004	-0.601237710857088	8.47263217071068e-08
ENSG00000100580	283578	TMED8	transmembrane p24 trafficking protein family member 8	702.393749406342	-0.489090187444384	8.4924008752201e-08
ENSG00000100632	2079	ERH	ERH, mRNA splicing and mitosis factor	1338.17266160466	-0.445706513735452	8.53764409413073e-08
ENSG00000112419	9749	PHACTR2	phosphatase and actin regulator 2	206.530744110461	-0.830404216375695	8.54100111465945e-08
ENSG00000149428	10525	HYOU1	hypoxia up-regulated 1	3214.7810344337	-0.313956532626911	8.54100111465945e-08
ENSG00000198938	4514	COX3	cytochrome c oxidase III	15648.9759695968	-0.989411577142048	8.54838026631199e-08
ENSG00000198700	55705	IPO9	importin 9	2660.48491874643	-0.306293848147897	8.67989021197982e-08
ENSG00000132530	54739	XAF1	XIAP associated factor 1	57.4677845953617	1.86696966701551	8.68178083340106e-08
ENSG00000132196	51478	HSD17B7	hydroxysteroid 17-beta dehydrogenase 7	190.736160843362	-0.847840395925565	8.68583471264192e-08
ENSG00000051128	9454	HOMER3	homer scaffold protein 3	300.443902060592	0.730025404595079	8.75239831367977e-08
ENSG00000115163	1058	CENPA	centromere protein A	419.608903563229	-0.615200953949882	8.78742999871559e-08
ENSG00000140474	25989	ULK3	unc-51 like kinase 3	528.908882660158	0.601249952563891	8.83558271829401e-08
ENSG00000010810	2534	FYN	FYN proto-oncogene, Src family tyrosine kinase	847.572267490521	0.459852561892862	8.90008474523492e-08
ENSG00000143248	8490	RGS5	regulator of G protein signaling 5	68.4167006997582	-1.40113475346113	8.90008474523492e-08
ENSG00000118655	64858	DCLRE1B	DNA cross-link repair 1B	458.843276552982	-0.575363405681197	8.99970900901075e-08
ENSG00000162961	84661	DPY30	dpy-30, histone methyltransferase complex regulatory subunit	345.542753178917	-0.662202984030406	8.99970900901075e-08
ENSG00000134780	747	DAGLA	diacylglycerol lipase alpha	121.886161475732	1.15711838958611	9.13810666654151e-08
ENSG00000206053	90861	JPT2	Jupiter microtubule associated homolog 2	1687.1856256346	-0.375370515452764	9.20034238428168e-08
ENSG00000104331	54928	IMPAD1	inositol monophosphatase domain containing 1	2685.82055884814	-0.323604610589765	9.4485605466783e-08
ENSG00000278540	31	ACACA	acetyl-CoA carboxylase alpha	1604.0454705243	-0.368306366626133	9.4971225373034e-08
ENSG00000100284	10043	TOM1	target of myb1 membrane trafficking protein	527.473651550341	0.557964451582675	9.68699090665591e-08
ENSG00000162723	89886	SLAMF9	SLAM family member 9	56.3353688094038	1.95763261972224	9.70242572510599e-08
ENSG00000142875	5567	PRKACB	protein kinase cAMP-activated catalytic subunit beta	911.541360344752	-0.466595912272052	9.72593434613241e-08
ENSG00000065457	23536	ADAT1	adenosine deaminase, tRNA specific 1	717.847836155817	-0.473580153172403	1.00077009711813e-07
ENSG00000139734	81624	DIAPH3	diaphanous related formin 3	544.171984093307	-0.539108788081174	1.01520650540962e-07
ENSG00000105722	2077	ERF	ETS2 repressor factor	1084.49082277763	0.415453562186812	1.02652321207175e-07
ENSG00000121957	29899	GPSM2	G protein signaling modulator 2	872.567970243398	-0.446900967777155	1.03002814505587e-07
ENSG00000143549	7170	TPM3	tropomyosin 3	5998.04979773633	-0.304660309796979	1.03309416387017e-07
ENSG00000233927	6234	RPS28	ribosomal protein S28	1224.52841936652	0.493882987011289	1.06293949148157e-07
ENSG00000091009	54439	RBM27	RNA binding motif protein 27	364.926355853516	-0.653956810987577	1.06676916043397e-07
ENSG00000180817	5464	PPA1	pyrophosphatase (inorganic) 1	691.952942138228	-0.480299861234015	1.06676916043397e-07
ENSG00000145730	5066	PAM	peptidylglycine alpha-amidating monooxygenase	4283.08200461435	-0.302756079783787	1.09716993565597e-07
ENSG00000165801	55701	ARHGEF40	Rho guanine nucleotide exchange factor 40	1730.44891753547	0.384105682708427	1.10536699303955e-07
ENSG00000140406	59274	TLNRD1	talin rod domain containing 1	718.937004359422	0.51966742326643	1.11849456600024e-07
ENSG00000147813	93100	NAPRT	nicotinate phosphoribosyltransferase	261.188386474458	0.798905044597485	1.13402049615479e-07
ENSG00000188352	54914	FOCAD	focadhesin	565.385729322221	-0.534680877987121	1.13402049615479e-07
ENSG00000115561	51652	CHMP3	charged multivesicular body protein 3	858.694747339345	-0.437750657632273	1.13524594652394e-07
ENSG00000173706	57493	HEG1	heart development protein with EGF like domains 1	618.913976148062	-0.517052487292028	1.13596032937634e-07
ENSG00000242125	8420	SNHG3	small nucleolar RNA host gene 3	449.562937174239	0.756173397027083	1.14475089055282e-07
ENSG00000123728	57826	RAP2C	RAP2C, member of RAS oncogene family	540.529268318502	-0.533385238315521	1.16203281082169e-07
ENSG00000186111	23396	PIP5K1C	phosphatidylinositol-4-phosphate 5-kinase type 1 gamma	600.410928336468	0.538080337137735	1.17913174694883e-07
ENSG00000137574	96764	TGS1	trimethylguanosine synthase 1	525.113251065818	-0.566535398705196	1.19911072674849e-07
ENSG00000138757	9908	G3BP2	G3BP stress granule assembly factor 2	2544.97028239703	-0.333811052053132	1.19911072674849e-07
ENSG00000108509	23125	CAMTA2	calmodulin binding transcription activator 2	314.043879571136	0.794675473156918	1.20199138284397e-07
ENSG00000222009	149478	BTBD19	BTB domain containing 19	93.0023624252901	1.66906268213541	1.20917136643694e-07
ENSG00000157227	4323	MMP14	matrix metallopeptidase 14	3487.24867951031	0.316260394207831	1.24661018936607e-07
ENSG00000212719	339263	C17orf51	chromosome 17 open reading frame 51	133.84482701574	1.07836281071656	1.24875813933199e-07
ENSG00000132676	7818	DAP3	death associated protein 3	2077.68097634963	-0.340385677543955	1.2754784796163e-07
ENSG00000104365	3551	IKBKB	inhibitor of nuclear factor kappa B kinase subunit beta	377.582508561153	0.680713383584134	1.28701302716071e-07
ENSG00000167671	80700	UBXN6	UBX domain protein 6	717.728519348248	0.509158351996485	1.29939113552105e-07
ENSG00000162430	57190	SELENON	selenoprotein N	3730.23637883381	-0.279476285263583	1.30186951461909e-07
ENSG00000140262	6938	TCF12	transcription factor 12	1612.95036367402	-0.373754916829789	1.30446472540959e-07
ENSG00000153048	23589	CARHSP1	calcium regulated heat stable protein 1	773.619524888804	-0.48817949567297	1.32314176615935e-07
ENSG00000180891	404093	CUEDC1	CUE domain containing 1	1576.31237686635	0.365324646010758	1.32401808247263e-07
ENSG00000115211	8890	EIF2B4	eukaryotic translation initiation factor 2B subunit delta	460.786289475545	0.59726025879021	1.33266358861741e-07
ENSG00000006210	6376	CX3CL1	C-X3-C motif chemokine ligand 1	418.095250605304	-0.603832665223393	1.33576921528603e-07
ENSG00000058091	5218	CDK14	cyclin dependent kinase 14	502.047533460698	-0.536760213991323	1.33762556754148e-07
ENSG00000071575	28951	TRIB2	tribbles pseudokinase 2	3462.20788864632	-0.30642073469451	1.34970787569814e-07
ENSG00000101639	55125	CEP192	centrosomal protein 192	556.449735133555	-0.521929367826721	1.37129450776282e-07
ENSG00000092140	55632	G2E3	G2/M-phase specific E3 ubiquitin protein ligase	416.968887108556	-0.606015845315639	1.37487296419512e-07
ENSG00000206560	23243	ANKRD28	ankyrin repeat domain 28	1917.6583488624	0.338152358264117	1.37487296419512e-07
ENSG00000215440	79716	NPEPL1	aminopeptidase like 1	91.3615584584897	1.42128744630334	1.3966575888335e-07
ENSG00000080503	6595	SMARCA2	SWI/SNF related, matrix associated, actin dependent regulator of chromatin, subfamily a, member 2	1348.99051121709	-0.372947783783173	1.3991791862255e-07
ENSG00000148396	9919	SEC16A	SEC16 homolog A, endoplasmic reticulum export factor	1334.10029880138	0.382126799557817	1.40375420202642e-07
ENSG00000114573	523	ATP6V1A	ATPase H+ transporting V1 subunit A	1324.06941165124	-0.391337940879781	1.41386098920103e-07
ENSG00000145675	5295	PIK3R1	phosphoinositide-3-kinase regulatory subunit 1	1201.60744534131	-0.391669062049328	1.41391956849111e-07
ENSG00000129003	54832	VPS13C	vacuolar protein sorting 13 homolog C	1343.78988179501	0.417048093316842	1.46253178372632e-07
ENSG00000112902	9037	SEMA5A	semaphorin 5A	526.541027790483	0.599995882220051	1.50291812334239e-07
ENSG00000165868	259217	HSPA12A	heat shock protein family A (Hsp70) member 12A	655.943199031997	0.531435544809077	1.51767142758092e-07
ENSG00000122643	51251	NT5C3A	5'-nucleotidase, cytosolic IIIA	484.921284020625	0.577853598126237	1.53627613594401e-07
ENSG00000146426	26230	TIAM2	T cell lymphoma invasion and metastasis 2	173.935321455991	0.934479600645726	1.54203620417333e-07
ENSG00000137285	347733	TUBB2B	tubulin beta 2B class IIb	575.939270771992	-0.510645951541461	1.54998696624383e-07
ENSG00000198162	10905	MAN1A2	mannosidase alpha class 1A member 2	1430.85161696035	-0.365625569350525	1.58110472181505e-07
ENSG00000125166	2806	GOT2	glutamic-oxaloacetic transaminase 2	1672.1590758624	-0.350197081363252	1.61192316113923e-07
ENSG00000117713	8289	ARID1A	AT-rich interaction domain 1A	1446.01704822463	0.381014868874506	1.62073835851781e-07
ENSG00000137601	4750	NEK1	NIMA related kinase 1	467.937640030606	-0.552046033728744	1.68227944969754e-07
ENSG00000147874	54801	HAUS6	HAUS augmin like complex subunit 6	600.188330669923	-0.518124083580611	1.68523244847796e-07
ENSG00000170734	5429	POLH	DNA polymerase eta	357.440489466927	-0.615003843717833	1.68709909860663e-07
ENSG00000198157	79366	HMGN5	high mobility group nucleosome binding domain 5	68.1302819326613	1.60095111388811	1.69085840332729e-07
ENSG00000100216	56993	TOMM22	translocase of outer mitochondrial membrane 22	1284.99868122969	-0.427667214806104	1.69408700454514e-07
ENSG00000131462	7283	TUBG1	tubulin gamma 1	814.895914559241	-0.495772794667073	1.69408700454514e-07
ENSG00000011454	2844	GPR21	G protein-coupled receptor 21	556.978388732701	-0.51839060688463	1.70696602986969e-07
ENSG00000198597	9745	ZNF536	zinc finger protein 536	133.74578809951	1.05849793476663	1.70866099523621e-07
ENSG00000198918	6170	RPL39	ribosomal protein L39	128.913941233055	-0.985388702032699	1.73863881287539e-07
ENSG00000101773	5932	RBBP8	RB binding protein 8, endonuclease	533.807178976386	-0.561586949452082	1.79165881432289e-07
ENSG00000214176	440456	PLEKHM1P1	Pleckstrin Homology And RUN Domain Containing M1 Pseudogene 1	136.985579568733	1.24707779558877	1.79235906102712e-07
ENSG00000128245	7533	YWHAH	tyrosine 3-monooxygenase/tryptophan 5-monooxygenase activation protein eta	1777.27149276466	-0.395990888255254	1.81025925093261e-07
ENSG00000168092	5049	PAFAH1B2	platelet activating factor acetylhydrolase 1b catalytic subunit 2	1288.86229479141	-0.408410501435366	1.81320801799144e-07
ENSG00000197535	4644	MYO5A	myosin VA	4127.63515958883	-0.281015094521105	1.82141753027958e-07
ENSG00000128165	79924	ADM2	adrenomedullin 2	20.9457583433492	6.90270448549195	1.87224002747429e-07
ENSG00000176485	11145	PLA2G16	phospholipase A2 group XVI	197.411322214707	0.875552959953023	1.87753307922491e-07
ENSG00000136122	79866	BORA	bora, aurora kinase A activator	161.945731100755	-0.901059254871082	1.89098037105601e-07
ENSG00000138346	1763	DNA2	DNA replication helicase/nuclease 2	289.530462216655	-0.687882745543828	1.89534705092848e-07
ENSG00000145979	51256	TBC1D7	TBC1 domain family member 7	292.162071210243	0.708253071157721	1.89777200818161e-07
ENSG00000151849	55835	CENPJ	centromere protein J	350.405863727705	-0.6497270653135	1.92433968779282e-07
ENSG00000099797	9524	TECR	trans-2,3-enoyl-CoA reductase	1183.59585897468	-0.392420088201685	1.95301537229932e-07
ENSG00000071894	29894	CPSF1	cleavage and polyadenylation specific factor 1	1195.38358424805	0.461676221445676	1.98982992099088e-07
ENSG00000142541	23521	RPL13A	ribosomal protein L13a	6778.99104577104	0.321425313404357	1.98982992099088e-07
ENSG00000188811	387921	NHLRC3	NHL repeat containing 3	325.286730206324	0.756533935306782	2.02439475756673e-07
ENSG00000172922	84153	RNASEH2C	ribonuclease H2 subunit C	675.536964289932	0.505046733272398	2.03481313259572e-07
ENSG00000152684	53918	PELO	pelota mRNA surveillance and ribosome rescue factor	509.548222474093	0.581589858223814	2.06520412211515e-07
ENSG00000187676	145173	B3GLCT	beta 3-glucosyltransferase	277.138083689473	-0.74213125964227	2.08862363988989e-07
ENSG00000224032	114915	EPB41L4A-AS1	EPB41L4A Antisense RNA 1	129.223350345363	1.11687381961896	2.09509464322538e-07
ENSG00000108784	4669	NAGLU	N-acetyl-alpha-glucosaminidase	660.336527588247	0.509973381772736	2.10848751295865e-07
ENSG00000107159	768	CA9	carbonic anhydrase 9	27.3128842280712	3.74798308004904	2.11593299879026e-07
ENSG00000155660	9601	PDIA4	protein disulfide isomerase family A member 4	9041.78260035883	-0.286109630608287	2.11906425627638e-07
ENSG00000159147	29980	DONSON	downstream neighbor of SON	506.954547480632	-0.534465475062594	2.13794387509008e-07
ENSG00000132740	3508	IGHMBP2	immunoglobulin mu binding protein 2	403.333625128859	0.630147234056727	2.22785451066841e-07
ENSG00000125817	1059	CENPB	centromere protein B	3039.17119031746	0.384014596437369	2.23338649376215e-07
ENSG00000104388	5862	RAB2A	RAB2A, member RAS oncogene family	886.682710289673	-0.46567010503617	2.26176126771613e-07
ENSG00000100299	410	ARSA	arylsulfatase A	331.750057152492	0.664173640048828	2.27927285900266e-07
[truncated: 604 more rows]
