# Supplementary material for: Targeting Orphan G Protein-Coupled Receptor 17 with T0 Ligand Impairs Glioblastoma Growth
Source: Cancers (Basel). 2021 Jul 27;13(15):3773. doi: 10.3390/cancers13153773 (PMC8345100; doi:10.3390/cancers13153773)
Supplement: Supplementary file 1 [file cancers-13-03773-s001.zip › Supplementary Table S2.xlsx]

## Sheet: Table S2_Snb19
Supplementary Table S2. The list shows the genes that were differentially expressed in GA-T0 vs Untreated in the cell type analysis using DESeq2
ENSEMBL	ENTREZID	SYMBOL	GENENAME	baseMean	log2FoldChange	padj
ENSG00000046653	2824	GPM6B	glycoprotein M6B	3410.31879299399	-1.57763226500369	0
ENSG00000092621	26227	PHGDH	phosphoglycerate dehydrogenase	15391.23018288	1.29610464775591	0
ENSG00000099194	6319	SCD	stearoyl-CoA desaturase	16120.8280206054	-1.25359490263943	0
ENSG00000103257	8140	SLC7A5	solute carrier family 7 member 5	11138.789812152	1.48817422455298	0
ENSG00000106366	5054	SERPINE1	serpin family E member 1	4761.96253948876	-1.88056903485521	0
ENSG00000111859	4739	NEDD9	neural precursor cell expressed, developmentally down-regulated 9	6110.63011370072	-1.20231744976901	0
ENSG00000113657	1809	DPYSL3	dihydropyrimidinase like 3	8170.48048665826	-1.45941082616921	0
ENSG00000130513	9518	GDF15	growth differentiation factor 15	1377.1495009429	3.70135713978337	0
ENSG00000134853	5156	PDGFRA	platelet derived growth factor receptor alpha	5009.77330474748	-1.93611843989611	0
ENSG00000143933	805	CALM2	calmodulin 2	10219.3561620657	-0.967660990103592	0
ENSG00000145632	10769	PLK2	polo like kinase 2	1909.86853518031	-1.92593303951857	0
ENSG00000145824	9547	CXCL14	C-X-C motif chemokine ligand 14	3026.63428694235	-3.96990949548971	0
ENSG00000150687	11098	PRSS23	serine protease 23	4203.2796836371	-1.42303580857524	0
ENSG00000158710	8407	TAGLN2	transgelin 2	14667.3886087147	-1.0377174842722	0
ENSG00000164692	1278	COL1A2	collagen type I alpha 2 chain	9138.27018901969	-1.61115401403192	0
ENSG00000170345	2353	FOS	Fos proto-oncogene, AP-1 transcription factor subunit	1209.16215419819	-3.86061661289234	0
ENSG00000182718	302	ANXA2	annexin A2	33728.5161990608	-0.759304525238982	0
ENSG00000197956	6277	S100A6	S100 calcium binding protein A6	16404.3141408743	-1.05965151626856	0
ENSG00000205426	3887	KRT81	keratin 81	7734.73393219674	-1.76909058909788	0
ENSG00000213639	5500	PPP1CB	protein phosphatase 1 catalytic subunit beta	10393.4003441186	-1.30439617482728	0
ENSG00000124225	56937	PMEPA1	prostate transmembrane protein, androgen induced 1	10126.4282469005	-0.886149237787197	1.6988738216279e-295
ENSG00000142871	3491	CYR61	cysteine rich angiogenic inducer 61	4458.83441404435	-1.42157538892963	2.21548703530375e-290
ENSG00000135069	29968	PSAT1	phosphoserine aminotransferase 1	2690.67737660132	1.84142594415094	3.46538851576099e-280
ENSG00000164300	256987	SERINC5	serine incorporator 5	5577.07940656461	1.1780586854814	3.529599072624e-274
ENSG00000134308	10971	YWHAQ	tyrosine 3-monooxygenase/tryptophan 5-monooxygenase activation protein theta	12349.4966793256	-0.806241404945529	9.85957495767858e-252
ENSG00000171992	11346	SYNPO	synaptopodin	670.628147975794	-3.03857349513239	3.07766547002384e-245
ENSG00000111371	81539	SLC38A1	solute carrier family 38 member 1	3677.18202098634	1.39613417682186	1.05691984922909e-242
ENSG00000120093	3213	HOXB3	homeobox B3	1988.74649055098	-1.64267688251602	3.08613449242271e-239
ENSG00000137868	64220	STRA6	stimulated by retinoic acid 6	2221.6936136983	-1.49253209915842	1.84068637880953e-233
ENSG00000105974	857	CAV1	caveolin 1	4828.29471668203	-1.25477961576592	9.13379880471651e-226
ENSG00000117519	1266	CNN3	calponin 3	10178.1633937014	-0.807172792980708	6.21022830039984e-221
ENSG00000050165	27122	DKK3	dickkopf WNT signaling pathway inhibitor 3	3738.67635973732	-1.35906675529921	1.12524125248881e-220
ENSG00000146197	222663	SCUBE3	signal peptide, CUB domain and EGF like domain containing 3	3863.87111472292	-1.18441291730875	1.84321853846367e-214
ENSG00000065534	4638	MYLK	myosin light chain kinase	4833.7490807918	-1.17413233032896	1.69818351136484e-212
ENSG00000120738	1958	EGR1	early growth response 1	2575.18583357868	-4.56986494007358	2.68073319053495e-211
ENSG00000197747	6281	S100A10	S100 calcium binding protein A10	3747.38062237161	-1.15521109539317	7.47015194875462e-210
ENSG00000272398	100133941	CD24	CD24 molecule	1749.40174218615	-1.62826138160951	8.23658014635504e-201
ENSG00000117394	6513	SLC2A1	solute carrier family 2 member 1	9127.49333639267	-0.806381606135566	1.04142894626248e-198
ENSG00000105281	6510	SLC1A5	solute carrier family 1 member 5	5651.65153390451	1.15730656448365	1.08185672379362e-192
ENSG00000161011	8878	SQSTM1	sequestosome 1	4871.78627233356	1.12936496703194	1.82169102785757e-186
ENSG00000041982	3371	TNC	tenascin C	19126.2855412072	0.754712252876924	5.76296179099515e-185
ENSG00000156804	114907	FBXO32	F-box protein 32	7256.73764383602	0.822050509896737	1.14008110045628e-183
ENSG00000169991	126917	IFFO2	intermediate filament family orphan 2	1800.92615728809	-1.46157551480577	2.93722570591658e-183
ENSG00000118523	1490	CTGF	connective tissue growth factor	3214.02293533829	-1.30731473090175	1.27246501466654e-179
ENSG00000111341	4256	MGP	matrix Gla protein	1180.65131274259	2.40161626685083	1.39187444710794e-176
ENSG00000107984	22943	DKK1	dickkopf WNT signaling pathway inhibitor 1	5164.12315469322	1.07499899142474	1.3344182636937e-173
ENSG00000136235	10457	GPNMB	glycoprotein nmb	2000.68893884515	1.73847714204705	1.94002423742396e-173
ENSG00000034510	9168	TMSB10	thymosin beta 10	10720.2374663072	-0.782178645345195	7.55114478768272e-170
ENSG00000197355	91373	UAP1L1	UDP-N-acetylglucosamine pyrophosphorylase 1 like 1	912.512672874781	2.17950396808427	2.68749307955575e-169
ENSG00000168003	6520	SLC3A2	solute carrier family 3 member 2	6470.96595369022	0.996040687526106	8.03567751325635e-169
ENSG00000072310	6720	SREBF1	sterol regulatory element binding transcription factor 1	2849.01033124122	-1.14469993590927	6.67644897171808e-168
ENSG00000026025	7431	VIM	vimentin	52204.878786734	-0.577846830989836	6.0626129395277e-166
ENSG00000128272	468	ATF4	activating transcription factor 4	2887.16028820992	1.2353722863507	1.44511575439217e-161
ENSG00000132640	22903	BTBD3	BTB domain containing 3	5626.03631695957	-0.799376643226824	3.89480935106931e-160
ENSG00000177706	56975	FAM20C	FAM20C, golgi associated secretory pathway kinase	3848.28281433023	-1.17403160793369	4.57360308010171e-158
ENSG00000196262	5478	PPIA	peptidylprolyl isomerase A	11607.1067196551	-0.604001602209586	1.81340920051101e-153
ENSG00000150625	2823	GPM6A	glycoprotein M6A	10737.9885118903	-0.896926451384331	3.16644039674634e-153
ENSG00000169908	4071	TM4SF1	transmembrane 4 L six family member 1	1427.31140157841	-1.42021737928479	3.74058295446106e-152
ENSG00000142156	1291	COL6A1	collagen type VI alpha 1 chain	8288.71583855056	0.773857089667492	5.05244441418545e-152
ENSG00000277443	4082	MARCKS	myristoylated alanine rich protein kinase C substrate	9991.53021442784	-0.692363628563329	8.2839361859695e-152
ENSG00000101255	57761	TRIB3	tribbles pseudokinase 3	1131.54778227701	1.78913106831768	2.27719963574583e-151
ENSG00000075426	2355	FOSL2	FOS like 2, AP-1 transcription factor subunit	4215.47203382245	-0.914510453842581	4.42900525924934e-151
ENSG00000112769	3910	LAMA4	laminin subunit alpha 4	2945.91253466097	-1.31013973104785	2.11457257083814e-148
ENSG00000186575	4771	NF2	neurofibromin 2	3169.66166802595	-1.0012542358654	3.2377950662e-147
ENSG00000091129	4897	NRCAM	neuronal cell adhesion molecule	1818.49163688114	1.29057956187228	4.76604069942891e-147
ENSG00000182871	80781	COL18A1	collagen type XVIII alpha 1 chain	4300.22296774803	1.01074584401659	4.50196646322346e-146
ENSG00000177565	79718	TBL1XR1	transducin beta like 1 X-linked receptor 1	2397.40159283205	-1.23555150228618	5.60720882292771e-146
ENSG00000164128	4886	NPY1R	neuropeptide Y receptor Y1	839.006430601024	-1.96333537493065	4.56504878169466e-145
ENSG00000196305	3376	IARS	isoleucyl-tRNA synthetase	4700.67332613833	0.84245698951195	3.85293643532858e-142
ENSG00000064393	28996	HIPK2	homeodomain interacting protein kinase 2	6239.09610735258	-0.944779562388015	3.87945343647275e-141
ENSG00000197081	3482	IGF2R	insulin like growth factor 2 receptor	7768.52826657922	0.844198936322799	1.41541274243513e-139
ENSG00000120708	7045	TGFBI	transforming growth factor beta induced	12260.0929051892	-0.630448989729087	7.0672484159253e-139
ENSG00000128965	79094	CHAC1	ChaC glutathione specific gamma-glutamylcyclotransferase 1	406.227388331147	3.51892346218233	7.48606997448579e-139
ENSG00000163359	1293	COL6A3	collagen type VI alpha 3 chain	761.224023936948	-2.18383427316499	3.57989135655251e-136
ENSG00000085063	966	CD59	CD59 molecule (CD59 blood group)	5538.06286788645	-0.868945241961737	1.16981186953723e-134
ENSG00000244405	2119	ETV5	ETS variant 5	1677.88831196155	1.35456046464093	3.34802642190423e-134
ENSG00000134684	8565	YARS	tyrosyl-tRNA synthetase	2802.34927878225	1.0496592701611	8.87924556122911e-133
ENSG00000101911	5634	PRPS2	phosphoribosyl pyrophosphate synthetase 2	2878.90065913926	-0.957769849240107	1.22016139775834e-132
ENSG00000143878	388	RHOB	ras homolog family member B	1956.75980577702	-1.22210882149724	3.73397637577284e-131
ENSG00000135074	8728	ADAM19	ADAM metallopeptidase domain 19	6946.73210067694	-0.706770258780242	2.53695122091058e-130
ENSG00000149212	143686	SESN3	sestrin 3	4663.98040866658	-0.788325723410281	3.74538741095251e-130
ENSG00000100292	3162	HMOX1	heme oxygenase 1	752.866659758901	1.96450724664864	6.64404470785596e-130
ENSG00000106278	5803	PTPRZ1	protein tyrosine phosphatase, receptor type Z1	833.213191502039	1.91264968248527	8.32817080586338e-130
ENSG00000122861	5328	PLAU	plasminogen activator, urokinase	1041.2961566785	-1.66355597345891	1.11597935160132e-128
ENSG00000105968	94239	H2AFV	H2A histone family member V	5324.85816127663	-0.835619651956264	1.58377449720925e-127
ENSG00000167978	23524	SRRM2	serine/arginine repetitive matrix 2	7833.69330662814	0.785503687008412	2.84675376956414e-127
ENSG00000147852	7436	VLDLR	very low density lipoprotein receptor	4540.98594771052	-0.850294169529526	9.32645539552139e-127
ENSG00000154096	7070	THY1	Thy-1 cell surface antigen	4839.26511199527	-0.7585047391336	1.25253990591042e-125
ENSG00000163171	10602	CDC42EP3	CDC42 effector protein 3	5399.79499502552	-0.836790897602512	1.37213520435221e-125
ENSG00000008710	5310	PKD1	polycystin 1, transient receptor potential channel interacting	1783.87772156861	1.25355616642736	8.90259933743689e-125
ENSG00000079931	26002	MOXD1	monooxygenase DBH like 1	3064.35241282585	-1.02155614790376	9.73140558111747e-125
ENSG00000087460	2778	GNAS	GNAS complex locus	17787.23007088	-0.535579869617502	1.71244188950247e-124
ENSG00000168209	54541	DDIT4	DNA damage inducible transcript 4	1174.09353358549	1.57348680536646	3.57932823829306e-124
ENSG00000124766	6659	SOX4	SRY-box 4	5352.96614371262	-0.925487314844254	1.12797039530462e-123
ENSG00000186480	3638	INSIG1	insulin induced gene 1	2143.53068076273	-1.04627854569719	6.98554006949303e-123
ENSG00000132182	23225	NUP210	nucleoporin 210	3425.01589045009	0.959523242701678	1.49581368994781e-122
ENSG00000078369	2782	GNB1	G protein subunit beta 1	9887.7997728035	-0.582688602119	8.18816167585812e-122
ENSG00000166123	84706	GPT2	glutamic--pyruvic transaminase 2	2111.27966517888	1.22573060776853	3.01070401284027e-121
ENSG00000122779	8805	TRIM24	tripartite motif containing 24	1714.94888555975	-1.17531095554707	5.71832009472617e-120
ENSG00000196754	6273	S100A2	S100 calcium binding protein A2	694.107880096887	-1.85609304553882	4.91353876092121e-119
ENSG00000197063	4097	MAFG	MAF bZIP transcription factor G	1704.06060355981	1.209458356757	1.98845882901594e-117
ENSG00000162734	8682	PEA15	proliferation and apoptosis adaptor protein 15	6018.68146994769	-0.745719253739834	2.53640699461331e-117
ENSG00000035403	7414	VCL	vinculin	6547.21521432708	-0.726431240775154	3.26635035613268e-117
ENSG00000179761	51268	PIPOX	pipecolic acid and sarcosine oxidase	1566.52003372721	-1.27536649513432	1.87545362628761e-116
ENSG00000106105	2617	GARS	glycyl-tRNA synthetase	5398.34772853122	0.791686335745368	4.19004289767463e-116
ENSG00000177606	3725	JUN	Jun proto-oncogene, AP-1 transcription factor subunit	3648.71397970744	-0.834551768739488	2.22230033456977e-115
ENSG00000196365	9361	LONP1	lon peptidase 1, mitochondrial	3757.92464741353	0.898140129941021	2.5645951267938e-113
ENSG00000065911	10797	MTHFD2	methylenetetrahydrofolate dehydrogenase (NADP+ dependent) 2, methenyltetrahydrofolate cyclohydrolase	2264.52782036994	1.10829693520024	8.87822633075241e-113
ENSG00000132718	23208	SYT11	synaptotagmin 11	5895.56881584996	-0.734841204800125	1.42630924813301e-112
ENSG00000161016	6132	RPL8	ribosomal protein L8	15454.3658390961	0.518393354121654	1.87255386027269e-112
ENSG00000130147	23677	SH3BP4	SH3 domain binding protein 4	3465.47899463488	-0.80439186038119	2.60833124562942e-112
ENSG00000171873	146	ADRA1D	adrenoceptor alpha 1D	1131.15853870959	-1.380241133181	2.92501709723629e-111
ENSG00000177098	6330	SCN4B	sodium voltage-gated channel beta subunit 4	341.684523964783	-2.75452021429047	1.71219244364798e-109
ENSG00000167522	29123	ANKRD11	ankyrin repeat domain 11	4333.5598188025	0.749874120091788	1.01626829550176e-108
ENSG00000078269	8871	SYNJ2	synaptojanin 2	2286.89665554922	-0.962003639882235	1.16117703707903e-108
ENSG00000140945	1012	CDH13	cadherin 13	1269.9848331451	-1.48648533424733	3.92444186878852e-108
ENSG00000132475	3021	H3F3B	H3 histone family member 3B	10522.5125455772	-0.537902344522777	1.08051511941355e-107
ENSG00000244509	27350	APOBEC3C	apolipoprotein B mRNA editing enzyme catalytic subunit 3C	1161.67745186479	-1.32726337020687	4.12617100966295e-107
ENSG00000152377	6695	SPOCK1	SPARC (osteonectin), cwcv and kazal like domains proteoglycan 1	1110.83039697166	-1.41819501430184	7.70974576288565e-107
ENSG00000118432	1268	CNR1	cannabinoid receptor 1	1344.56125901422	-1.24466341525027	1.70552948846326e-106
ENSG00000180900	23513	SCRIB	scribbled planar cell polarity protein	2275.18781418243	0.970081660312018	2.22279281168524e-106
ENSG00000069275	64710	NUCKS1	nuclear casein kinase and cyclin dependent kinase substrate 1	14672.181465545	-0.529000189129609	2.85089587363598e-106
ENSG00000124813	860	RUNX2	runt related transcription factor 2	1039.8895151393	-1.44711620484432	2.95181128955572e-106
ENSG00000137801	7057	THBS1	thrombospondin 1	12536.9710040274	-0.650246143141192	6.00556142952655e-106
ENSG00000178719	2907	GRINA	glutamate ionotropic receptor NMDA type subunit associated protein 1	2281.76505573893	0.990326332097897	2.69566989485171e-105
ENSG00000175662	146691	TOM1L2	target of myb1 like 2 membrane trafficking protein	2053.12365119888	-1.00635791412561	5.76012767200255e-105
ENSG00000099282	23555	TSPAN15	tetraspanin 15	2637.17402412255	-0.891352768191658	3.52962514177951e-104
ENSG00000171617	8507	ENC1	ectodermal-neural cortex 1	9703.43504611678	-0.588678194018737	4.55309202030684e-104
ENSG00000179832	727957	MROH1	maestro heat like repeat family member 1	753.127832466943	1.66003118022975	9.76974905121292e-104
ENSG00000136238	5879	RAC1	Rac family small GTPase 1	6461.4640638785	-0.669164407083723	1.48165661961319e-103
ENSG00000077092	5915	RARB	retinoic acid receptor beta	902.562919745775	-1.4845841980146	2.50897928451082e-102
ENSG00000090861	16	AARS	alanyl-tRNA synthetase	3829.42972850498	0.804941021231026	5.59677928547475e-102
ENSG00000176871	55884	WSB2	WD repeat and SOCS box containing 2	3698.61298815306	-0.792317610834053	1.35981248173119e-101
ENSG00000101680	284217	LAMA1	laminin subunit alpha 1	379.1998632795	2.6357148961866	1.92248892521733e-101
ENSG00000221978	81669	CCNL2	cyclin L2	2532.62089701255	1.00517597211709	3.59498042519575e-101
ENSG00000172216	1051	CEBPB	CCAAT enhancer binding protein beta	1183.20763270138	1.30599981344995	1.08689712667014e-99
ENSG00000255302	23741	EID1	EP300 interacting inhibitor of differentiation 1	6858.07454897563	-0.57537029848532	1.0840092037813e-97
ENSG00000160888	9592	IER2	immediate early response 2	1096.16897757428	-1.34531195491367	2.51674900866276e-97
ENSG00000117632	3925	STMN1	stathmin 1	7336.69902900926	-0.600674273707291	3.68135404627504e-96
ENSG00000242265	23089	PEG10	paternally expressed 10	6236.14350361089	-0.665693718854411	1.40878910721226e-95
ENSG00000064042	22998	LIMCH1	LIM and calponin homology domains 1	5044.5457797412	-0.684314421238628	1.63920998605543e-95
ENSG00000114353	2771	GNAI2	G protein subunit alpha i2	10426.3358475572	-0.511568951522379	8.07073315587169e-95
ENSG00000198053	140885	SIRPA	signal regulatory protein alpha	1766.95310614262	-1.10447445151535	1.09479206865744e-94
ENSG00000152402	2977	GUCY1A2	guanylate cyclase 1 soluble subunit alpha 2	1230.23296495839	-1.38541510157786	4.13961908119662e-94
ENSG00000135046	301	ANXA1	annexin A1	10727.3178086782	-0.539580888988118	1.46197127275776e-93
ENSG00000167702	90990	KIFC2	kinesin family member C2	504.071992084214	2.05290091184552	2.58155185620266e-93
ENSG00000068697	9741	LAPTM4A	lysosomal protein transmembrane 4 alpha	3727.90890897472	-0.708943076883768	8.8454527641134e-93
ENSG00000125868	11034	DSTN	destrin, actin depolymerizing factor	6524.02624327321	-0.606754177341809	9.01832778036904e-93
ENSG00000075624	60	ACTB	actin beta	109307.209652997	-0.37356534532698	1.1940456783549e-92
ENSG00000113013	3313	HSPA9	heat shock protein family A (Hsp70) member 9	8692.47478002745	0.565675816007401	1.609484471421e-92
ENSG00000150938	51232	CRIM1	cysteine rich transmembrane BMP regulator 1	3008.58140148791	-0.839106686079149	5.1362860428582e-92
ENSG00000123091	26994	RNF11	ring finger protein 11	3559.85937076367	-0.716555224692185	1.82054096600364e-90
ENSG00000182985	23705	CADM1	cell adhesion molecule 1	3768.3099817809	-0.741598248329391	5.19013470395119e-90
ENSG00000126247	826	CAPNS1	calpain small subunit 1	7038.13554465927	-0.61491715354998	6.35003697887707e-89
ENSG00000166986	4141	MARS	methionyl-tRNA synthetase	2624.47253475642	0.857338993181626	6.55665374949591e-89
ENSG00000135821	2752	GLUL	glutamate-ammonia ligase	2166.59775983347	-0.868918060384222	2.78380921609054e-88
ENSG00000104852	6625	SNRNP70	small nuclear ribonucleoprotein U1 subunit 70	4976.72729855696	0.702614023790064	1.06564505435799e-87
ENSG00000130766	83667	SESN2	sestrin 2	479.735729790882	1.99503436690538	1.46827399451853e-87
ENSG00000134013	4017	LOXL2	lysyl oxidase like 2	2890.04056327787	-0.826222508387434	2.06428872858471e-87
ENSG00000018510	8540	AGPS	alkylglycerone phosphate synthase	4943.74543297381	-0.629793561579557	1.03409104287167e-86
ENSG00000134824	9415	FADS2	fatty acid desaturase 2	2804.13261498243	-0.796891062343648	5.56828213770801e-86
ENSG00000070831	998	CDC42	cell division cycle 42	4562.36502960752	-0.630445230712267	5.76169620840061e-86
ENSG00000182621	23236	PLCB1	phospholipase C beta 1	622.719918620725	1.69467311146388	6.01450491326509e-86
ENSG00000120833	8835	SOCS2	suppressor of cytokine signaling 2	1266.40147930747	-1.15924925978643	1.32461867909118e-85
ENSG00000109819	10891	PPARGC1A	PPARG coactivator 1 alpha	593.047534356483	1.77869527585724	2.00442761655534e-85
ENSG00000170017	214	ALCAM	activated leukocyte cell adhesion molecule	2493.09470232219	-0.859261489152411	2.42025804900846e-84
ENSG00000122545	989	SEPTIN7	septin 7	5804.63317166638	-0.619506168789556	1.11122393455868e-83
ENSG00000147100	6567	SLC16A2	solute carrier family 16 member 2	2096.86329220135	-1.00873737500936	3.67453787865125e-83
ENSG00000184564	84189	SLITRK6	SLIT and NTRK like family member 6	269.087002159198	2.92868187257995	8.08574861416594e-82
ENSG00000104783	3783	KCNN4	potassium calcium-activated channel subfamily N member 4	1138.18031435623	1.18891696537541	1.16295204370649e-81
ENSG00000109099	5376	PMP22	peripheral myelin protein 22	3519.10846520015	-0.745599414547118	3.10593564904893e-81
ENSG00000145555	4651	MYO10	myosin X	4324.97153890767	0.778989863223436	6.15663462965159e-81
ENSG00000060656	10076	PTPRU	protein tyrosine phosphatase, receptor type U	1243.94697051502	-1.12121407394381	8.44465694130622e-81
ENSG00000132688	10763	NES	nestin	11296.4768620526	-0.536726448949452	1.5796027100879e-80
ENSG00000136156	9445	ITM2B	integral membrane protein 2B	10350.7175281668	-0.601547287298692	2.64528609437126e-80
ENSG00000196196	646962	HRCT1	histidine rich carboxyl terminus 1	713.943831546585	-1.48375152867392	3.60960507621597e-80
ENSG00000173852	23333	DPY19L1	dpy-19 like C-mannosyltransferase 1	2504.17007013995	-0.81012954405627	1.32345701215517e-79
ENSG00000113140	6678	SPARC	secreted protein acidic and cysteine rich	31015.1551426613	-0.441983833218929	6.33140718940158e-79
ENSG00000131584	116983	ACAP3	ArfGAP with coiled-coil, ankyrin repeat and PH domains 3	1353.46556743683	1.05082005347335	1.89031766420468e-78
ENSG00000171863	6201	RPS7	ribosomal protein S7	4627.47006726942	-0.666281260188367	4.45746921364829e-78
ENSG00000166741	4837	NNMT	nicotinamide N-methyltransferase	1343.70237865261	-1.05856297806496	9.29045448350663e-78
ENSG00000104529	1936	EEF1D	eukaryotic translation elongation factor 1 delta	1278.90433776951	1.11353045303677	1.58106384342525e-77
ENSG00000111913	9750	RIPOR2	RHO family interacting cell polarization regulator 2	341.556643919977	-2.21086172983251	1.8843204712081e-77
ENSG00000132361	23277	CLUH	clustered mitochondria homolog	2152.69803095498	0.849152308337981	6.02498366597135e-76
ENSG00000116209	9528	TMEM59	transmembrane protein 59	3913.75396983416	-0.642252589603506	1.55733988377669e-75
ENSG00000162595	9077	DIRAS3	DIRAS family GTPase 3	413.532354661958	-1.99006802809681	2.88078493039496e-75
ENSG00000140443	3480	IGF1R	insulin like growth factor 1 receptor	2190.80684828134	-0.801373400609604	4.82670542100516e-75
ENSG00000060718	1301	COL11A1	collagen type XI alpha 1 chain	1413.36136585685	2.66260556852043	6.30075709197807e-75
ENSG00000143067	90874	ZNF697	zinc finger protein 697	2760.64009589388	-0.804222600667565	1.03328820707302e-74
ENSG00000125637	23550	PSD4	pleckstrin and Sec7 domain containing 4	362.96576728254	-2.10927374523688	1.15600038330316e-74
ENSG00000177519	56475	RPRM	reprimo, TP53 dependent G2 arrest mediator homolog	204.215515193804	4.16817726563144	2.17331290940948e-74
ENSG00000076706	4162	MCAM	melanoma cell adhesion molecule	1181.31759582118	1.39011615768228	3.08310615285411e-73
ENSG00000178209	5339	PLEC	plectin	13061.6366760563	1.16151051541106	3.58470269998204e-73
ENSG00000103855	80381	CD276	CD276 molecule	3702.70881995159	0.692687684144741	3.40344106636613e-72
ENSG00000159167	6781	STC1	stanniocalcin 1	1523.74624089607	0.986163966365354	5.5917188085271e-72
ENSG00000044524	2042	EPHA3	EPH receptor A3	4061.69008060908	0.776138726013566	1.28746494005053e-71
ENSG00000167106	399665	FAM102A	family with sequence similarity 102 member A	852.459610720982	1.28282313239409	6.82571560693815e-71
ENSG00000245526	645323	LINC00461	long intergenic non-protein coding RNA 461	2575.28775975188	-0.848778366402506	1.42849566139444e-70
ENSG00000142627	1969	EPHA2	EPH receptor A2	2953.98215485641	-0.703271547885003	1.87180965692432e-70
ENSG00000031698	6301	SARS	seryl-tRNA synthetase	3194.61067229279	0.668715147831507	2.11867655504185e-70
ENSG00000158290	8450	CUL4B	cullin 4B	4432.36061763145	-0.631201038832073	1.04639184065316e-69
ENSG00000112697	55754	TMEM30A	transmembrane protein 30A	5951.13491506939	-0.568904824792337	1.95517881116637e-69
ENSG00000185630	5087	PBX1	PBX homeobox 1	1946.27837509371	-0.860332642591801	3.35673566420983e-69
ENSG00000114867	1981	EIF4G1	eukaryotic translation initiation factor 4 gamma 1	11327.8618328276	0.440774771410956	5.56788278751809e-69
ENSG00000171848	6241	RRM2	ribonucleotide reductase regulatory subunit M2	2625.76701464535	-0.747276887249198	6.18076900805857e-69
ENSG00000185189	340371	NRBP2	nuclear receptor binding protein 2	957.401421782907	1.21806601700027	1.03861486265022e-68
ENSG00000120278	57480	PLEKHG1	pleckstrin homology and RhoGEF domain containing G1	4425.68481356497	-0.582321398332608	2.12224808751725e-68
ENSG00000198355	415116	PIM3	Pim-3 proto-oncogene, serine/threonine kinase	880.674655862267	1.20536601494834	3.62899648788497e-68
ENSG00000038427	1462	VCAN	versican	6609.91329862319	1.30455744512546	4.27033333591709e-68
ENSG00000206579	114786	XKR4	XK related 4	283.681278884233	2.56463244988625	8.03791696758339e-68
ENSG00000100889	5106	PCK2	phosphoenolpyruvate carboxykinase 2, mitochondrial	494.471692112265	1.70930552655367	3.77544401117211e-67
ENSG00000179091	1537	CYC1	cytochrome c1	2195.24031293914	0.775019400598013	4.53885459225773e-67
ENSG00000166949	4088	SMAD3	SMAD family member 3	1497.86761217823	-0.969437625441562	5.4775373299851e-67
ENSG00000114978	55233	MOB1A	MOB kinase activator 1A	3513.23764102701	-0.620092754394691	9.44413923530016e-67
ENSG00000163032	7447	VSNL1	visinin like 1	513.293058618079	-1.54280267305131	1.07874120377115e-66
ENSG00000143195	387597	ILDR2	immunoglobulin like domain containing receptor 2	714.629337736118	-1.37901316899836	1.08439456364252e-66
ENSG00000142669	83442	SH3BGRL3	SH3 domain binding glutamate rich protein like 3	1326.44523612641	-1.00146947320245	1.13596201059671e-66
ENSG00000110619	833	CARS	cysteinyl-tRNA synthetase	1073.57470776302	1.0918643641804	1.17044074605501e-66
ENSG00000116584	9181	ARHGEF2	Rho/Rac guanine nucleotide exchange factor 2	1453.21090326842	0.943348517185272	2.33890393638429e-66
ENSG00000012660	60481	ELOVL5	ELOVL fatty acid elongase 5	7839.756390757	-0.494421806083135	2.57343137142733e-66
ENSG00000167552	7846	TUBA1A	tubulin alpha 1a	13623.2686388497	-0.457854311214019	1.15498524252001e-65
ENSG00000087086	2512	FTL	ferritin light chain	34875.2467950985	0.413009748827387	1.16538527669099e-65
ENSG00000120129	1843	DUSP1	dual specificity phosphatase 1	790.657097022748	-1.27959686322005	1.51409828215254e-65
ENSG00000136240	11014	KDELR2	KDEL endoplasmic reticulum protein retention receptor 2	7576.85182975072	-0.486466283981299	1.71612914113903e-65
ENSG00000265808	9554	SEC22B	SEC22 homolog B, vesicle trafficking protein (gene/pseudogene)	8812.56597795416	-0.475271673617081	2.4516688740283e-65
ENSG00000198840	4537	ND3	NADH dehydrogenase, subunit 3 (complex I)	3957.78879785058	-0.772099891500139	7.88100221035232e-65
ENSG00000153879	1054	CEBPG	CCAAT enhancer binding protein gamma	1994.49306006757	0.852957267501884	1.61704715847577e-64
ENSG00000138131	84171	LOXL4	lysyl oxidase like 4	401.533458576934	-1.76102086246857	8.52207353695986e-64
ENSG00000142173	1292	COL6A2	collagen type VI alpha 2 chain	4732.66971316739	0.62448308405711	1.35190273392163e-63
ENSG00000104899	268	AMH	anti-Mullerian hormone	346.41434936626	2.14336906570592	2.03475876849724e-63
ENSG00000140961	29948	OSGIN1	oxidative stress induced growth inhibitor 1	330.233500376761	2.10421393433938	3.09981315063941e-63
ENSG00000168028	3921	RPSA	ribosomal protein SA	9284.9763711776	-0.431084271372157	3.1571499179345e-63
ENSG00000205403	3426	CFI	complement factor I	750.388566602508	-1.29606089086243	3.42487414755577e-63
ENSG00000148655	83938	LRMDA	leucine rich melanocyte differentiation associated	193.305334245268	-2.71010744132725	5.92346418841933e-63
ENSG00000108828	10493	VAT1	vesicle amine transport 1	3126.35117706083	0.66186701535732	2.22614035509274e-62
ENSG00000117724	1063	CENPF	centromere protein F	10094.2573255723	0.47700248518449	7.44402652451254e-62
ENSG00000204386	4758	NEU1	neuraminidase 1	2576.44498079862	0.728312595744179	8.50630180781891e-62
ENSG00000164924	7534	YWHAZ	tyrosine 3-monooxygenase/tryptophan 5-monooxygenase activation protein zeta	9613.00286258204	-0.473692701516712	9.03184143544162e-62
ENSG00000184575	11260	XPOT	exportin for tRNA	3003.68895289233	0.680371042779331	1.02922298533776e-61
ENSG00000134954	2113	ETS1	ETS proto-oncogene 1, transcription factor	2439.59996360423	-0.692473757197875	1.81471571005812e-61
ENSG00000185122	3297	HSF1	heat shock transcription factor 1	1108.68466620278	1.02572673763819	2.29364365913416e-61
ENSG00000196562	55959	SULF2	sulfatase 2	2664.34553252781	-0.74986580907671	2.49391465340733e-61
ENSG00000070961	490	ATP2B1	ATPase plasma membrane Ca2+ transporting 1	1676.92782127543	0.854039970061304	6.45732662232391e-61
ENSG00000116489	829	CAPZA1	capping actin protein of muscle Z-line alpha subunit 1	3587.60649133171	-0.589173017341547	7.33946357088767e-61
ENSG00000162733	4921	DDR2	discoidin domain receptor tyrosine kinase 2	983.736994706409	1.19049133891274	9.2323796155583e-61
ENSG00000147853	50808	AK3	adenylate kinase 3	3071.67862624075	-0.672128136779107	1.00217984558153e-60
ENSG00000167601	558	AXL	AXL receptor tyrosine kinase	4901.81523795201	-0.651694492830722	1.08881436088939e-60
ENSG00000164713	25798	BRI3	brain protein I3	1197.24659359847	1.06092739501595	1.13867133510701e-60
ENSG00000150893	341640	FREM2	FRAS1 related extracellular matrix protein 2	353.092246275568	1.96799548245832	1.68624928397088e-60
ENSG00000001561	22875	ENPP4	ectonucleotide pyrophosphatase/phosphodiesterase 4	200.634144638895	3.07373583788173	2.82291481686979e-60
ENSG00000109971	3312	HSPA8	heat shock protein family A (Hsp70) member 8	20992.6808760906	-0.410351420618146	3.26415773988132e-60
ENSG00000129038	4016	LOXL1	lysyl oxidase like 1	1332.33556593613	-0.906337946403204	6.02249460013818e-60
ENSG00000101843	5716	PSMD10	proteasome 26S subunit, non-ATPase 10	1869.68543069126	-0.813770425394959	7.40139827490232e-60
ENSG00000067225	5315	PKM	pyruvate kinase M1/2	67913.4341173506	-0.333489781414696	1.31841338695988e-59
ENSG00000185567	113146	AHNAK2	AHNAK nucleoprotein 2	2150.22877449359	0.877036066958177	1.37364419505703e-59
ENSG00000185787	10933	MORF4L1	mortality factor 4 like 1	6293.32798982426	-0.516385214571059	1.80733711905977e-59
ENSG00000011304	5725	PTBP1	polypyrimidine tract binding protein 1	7586.71564218895	0.448858197723308	4.82376907225145e-59
ENSG00000130827	55558	PLXNA3	plexin A3	1503.22392078499	0.902865400519787	4.98770462218592e-59
ENSG00000143321	3068	HDGF	heparin binding growth factor	5189.94984813963	-0.497106106674644	4.98770462218592e-59
ENSG00000107731	219699	UNC5B	unc-5 netrin receptor B	667.111305173169	-1.27067690603	1.07388036057431e-58
ENSG00000148396	9919	SEC16A	SEC16 homolog A, endoplasmic reticulum export factor	2403.36945005564	0.76710246204787	2.03287245151933e-58
ENSG00000099810	4507	MTAP	methylthioadenosine phosphorylase	1599.04143493584	-0.907959793699366	2.49710834437796e-58
ENSG00000166913	7529	YWHAB	tyrosine 3-monooxygenase/tryptophan 5-monooxygenase activation protein beta	8316.90239797166	-0.435436878394253	3.17705389292282e-58
ENSG00000179300	203430	RTL3	retrotransposon Gag like 3	252.354596384915	-2.128557265552	3.76189288560164e-58
ENSG00000165934	53981	CPSF2	cleavage and polyadenylation specific factor 2	1205.86005077827	-0.927372827237257	5.14687410037057e-58
ENSG00000137154	6194	RPS6	ribosomal protein S6	17214.4160600922	-0.399350702145055	6.5353666981285e-58
ENSG00000115484	10575	CCT4	chaperonin containing TCP1 subunit 4	3465.68680857861	-0.589237210829849	7.8693028149208e-58
ENSG00000143621	3608	ILF2	interleukin enhancer binding factor 2	4673.13442514179	-0.508228403514532	1.24166929478213e-57
ENSG00000165617	51339	DACT1	dishevelled binding antagonist of beta catenin 1	680.931110789146	-1.23145321594668	1.3752507419284e-57
ENSG00000142910	64129	TINAGL1	tubulointerstitial nephritis antigen like 1	335.534702851075	-1.78494443368643	2.58301967685549e-57
ENSG00000140937	1009	CDH11	cadherin 11	952.566868661344	-1.03454201366911	2.80479674786062e-57
ENSG00000196230	203068	TUBB	tubulin beta class I	31194.7587848512	-0.395928879931205	4.68306556755687e-57
ENSG00000173706	57493	HEG1	heart development protein with EGF like domains 1	1455.04419200511	-0.942878345720606	5.28642073163487e-57
ENSG00000071894	29894	CPSF1	cleavage and polyadenylation specific factor 1	1941.57091509572	0.773105216502778	5.93336201292671e-57
ENSG00000008394	4257	MGST1	microsomal glutathione S-transferase 1	969.994892309526	1.07811546049145	2.09660510057835e-56
ENSG00000130844	55422	ZNF331	zinc finger protein 331	762.519411243196	1.26056097949253	2.1832865039412e-56
ENSG00000168488	11273	ATXN2L	ataxin 2 like	2167.91170710396	0.729208156705423	3.36051671301265e-56
ENSG00000039560	26064	RAI14	retinoic acid induced 14	3019.41084523486	-0.632299402736442	3.36433181753146e-56
ENSG00000105887	136319	MTPN	myotrophin	6278.73387518808	-0.491042713524625	5.29971979985431e-56
ENSG00000116962	4811	NID1	nidogen 1	4724.60476492261	0.571340828047491	1.05417463492343e-55
ENSG00000185650	677	ZFP36L1	ZFP36 ring finger protein like 1	3099.1309264788	-0.68373452516165	1.51469536220448e-55
ENSG00000179134	55095	SAMD4B	sterile alpha motif domain containing 4B	2956.20190606942	0.624462103106767	2.10044948962208e-55
ENSG00000084733	10890	RAB10	RAB10, member RAS oncogene family	4609.54206105452	-0.514020141907209	3.28547528473781e-55
ENSG00000104368	5327	PLAT	plasminogen activator, tissue type	2058.19877681972	-0.779207531371545	3.89060411628233e-55
ENSG00000168461	11031	RAB31	RAB31, member RAS oncogene family	2811.18082392067	-0.684340227159928	7.26544021729909e-55
ENSG00000147065	4478	MSN	moesin	16328.4151864004	-0.422847388740175	8.18261579087115e-55
ENSG00000128989	10776	ARPP19	cAMP regulated phosphoprotein 19	5081.37410040703	-0.566450393977556	8.43649352536895e-55
ENSG00000168386	11259	FILIP1L	filamin A interacting protein 1 like	448.538080634127	-1.57301400614197	1.07059180994677e-54
ENSG00000091986	151887	CCDC80	coiled-coil domain containing 80	212.02097920496	-2.41119247555792	1.20824717476367e-54
ENSG00000197969	23230	VPS13A	vacuolar protein sorting 13 homolog A	1372.87530340613	0.889451930910926	1.74546614783004e-54
ENSG00000167110	2801	GOLGA2	golgin A2	1860.82969421802	0.754656286940305	1.79538321054892e-54
ENSG00000006652	3475	IFRD1	interferon related developmental regulator 1	1734.5886333163	0.815833486981234	1.80955565722741e-54
ENSG00000138071	10097	ACTR2	ARP2 actin related protein 2 homolog	7775.74062270028	-0.442075454932128	2.22517830368173e-54
ENSG00000125968	3397	ID1	inhibitor of DNA binding 1, HLH protein	4688.92785011374	-0.507809640568358	2.42098743623281e-54
ENSG00000141522	396	ARHGDIA	Rho GDP dissociation inhibitor alpha	5798.04444917983	0.461534597838017	7.38555830160465e-54
ENSG00000203805	196051	PLPP4	phospholipid phosphatase 4	315.458958166667	-1.8186377311958	7.89268380795205e-54
ENSG00000104936	1760	DMPK	DM1 protein kinase	1077.62097704716	1.00784250791273	9.2808635799539e-54
ENSG00000070610	57704	GBA2	glucosylceramidase beta 2	1358.05231247304	0.86717420825791	1.4462120270165e-53
ENSG00000170290	6588	SLN	sarcolipin	234.261911260746	-2.29794676099809	1.50111721576857e-53
ENSG00000135540	57224	NHSL1	NHS like 1	784.233151548031	1.13477560805045	2.09659182777565e-53
ENSG00000204381	143903	LAYN	layilin	1745.21806064198	-0.748268835069178	2.153337025853e-53
ENSG00000131773	10656	KHDRBS3	KH RNA binding domain containing, signal transduction associated 3	1388.56813217253	0.836184381995027	4.78596446236838e-53
ENSG00000115461	3488	IGFBP5	insulin like growth factor binding protein 5	1864.892131069	-0.852099607860859	6.82512311878416e-53
ENSG00000107263	2889	RAPGEF1	Rap guanine nucleotide exchange factor 1	2776.14155663295	0.648516579747684	1.4382816578782e-52
ENSG00000108848	51747	LUC7L3	LUC7 like 3 pre-mRNA splicing factor	2461.85230349032	0.773725650781275	1.9884309271765e-52
ENSG00000146830	64599	GIGYF1	GRB10 interacting GYF protein 1	1232.68907205282	1.09289346890437	3.89155704832821e-52
ENSG00000150540	3176	HNMT	histamine N-methyltransferase	253.46407373391	-2.06055184575837	6.26291148713982e-52
ENSG00000006468	2115	ETV1	ETS variant 1	492.601997223582	1.47800229839529	7.98094371822934e-52
ENSG00000112033	5467	PPARD	peroxisome proliferator activated receptor delta	1847.98804718462	-0.721180218682445	1.00930436011896e-51
ENSG00000180398	90411	MCFD2	multiple coagulation factor deficiency 2	2694.00828285683	-0.627555491862226	1.04065171796005e-51
ENSG00000095752	3589	IL11	interleukin 11	371.482052453008	-1.65274456744902	1.89230354617086e-51
ENSG00000246985	144481	SOCS2-AS1	SOCS2 antisense RNA 1	211.479790703829	-2.22994643371997	3.22346150301057e-51
ENSG00000168389	84879	MFSD2A	major facilitator superfamily domain containing 2A	2235.06466460941	-0.672412221087943	5.21705132649433e-51
ENSG00000185818	339983	NAT8L	N-acetyltransferase 8 like	427.278207596253	1.56602964934409	7.9159772861927e-51
ENSG00000132424	25957	PNISR	PNN interacting serine and arginine rich protein	2092.46773371397	0.878394405355918	9.16429930467668e-51
ENSG00000164176	10085	EDIL3	EGF like repeats and discoidin domains 3	15730.7337626478	-0.433997036124271	1.05813234689402e-50
ENSG00000111674	2026	ENO2	enolase 2	1256.82688330127	0.924978772009073	1.62729350194932e-50
ENSG00000101670	9388	LIPG	lipase G, endothelial type	457.077361911428	-1.44942510093268	2.80124987598269e-50
ENSG00000218336	55714	TENM3	teneurin transmembrane protein 3	3267.23857499283	0.599289920875621	3.93787079501036e-50
ENSG00000163697	323	APBB2	amyloid beta precursor protein binding family B member 2	2283.73758231311	-0.689243113835837	5.5992611847311e-50
ENSG00000163931	7086	TKT	transketolase	22146.4199544009	-0.381519273415747	5.90095931779069e-50
ENSG00000168615	8754	ADAM9	ADAM metallopeptidase domain 9	7958.2694010595	-0.397795350627364	6.94734290125772e-50
ENSG00000005884	3675	ITGA3	integrin subunit alpha 3	20008.8010215556	-0.423870242029611	1.17847884699092e-49
ENSG00000171150	9655	SOCS5	suppressor of cytokine signaling 5	801.396437682293	-1.10816605820404	1.58190174872099e-49
ENSG00000159216	861	RUNX1	runt related transcription factor 1	1745.59694430181	-0.730234519099411	4.2876399403716e-49
ENSG00000176155	284001	CCDC57	coiled-coil domain containing 57	628.506191375388	1.24348582739531	8.17956494895374e-49
ENSG00000092847	26523	AGO1	argonaute 1, RISC catalytic component	2035.05680639469	-0.704798492776374	9.75187379463411e-49
ENSG00000108518	5216	PFN1	profilin 1	11663.5726583197	-0.366938671512195	1.06100232924325e-48
ENSG00000101849	6907	TBL1X	transducin beta like 1 X-linked	735.450692748338	1.14588302709894	1.27501316631086e-48
ENSG00000155876	10670	RRAGA	Ras related GTP binding A	2708.89513782186	-0.594313655944655	1.47150049210785e-48
ENSG00000181458	55076	TMEM45A	transmembrane protein 45A	499.039065354916	-1.34327255613305	1.56776959568696e-48
ENSG00000139211	347902	AMIGO2	adhesion molecule with Ig like domain 2	2281.20057358605	0.711767723984033	3.12807087042179e-48
ENSG00000179314	23302	WSCD1	WSC domain containing 1	967.289750019777	0.973898544578152	3.13795587650431e-48
ENSG00000206527	201562	HACD2	3-hydroxyacyl-CoA dehydratase 2	3686.90352975159	-0.556443929948847	3.58670288919489e-48
ENSG00000161013	11282	MGAT4B	mannosyl (alpha-1,3-)-glycoprotein beta-1,4-N-acetylglucosaminyltransferase, isozyme B	4151.36818442661	0.503562061583553	3.98500378920046e-48
ENSG00000162627	51375	SNX7	sorting nexin 7	1734.64792305562	-0.739915271134887	7.80095293307712e-48
ENSG00000137563	8836	GGH	gamma-glutamyl hydrolase	1672.34241656053	-0.739377194714973	1.33589430513587e-47
ENSG00000132680	22889	KHDC4	KH domain containing 4, pre-mRNA splicing factor	1255.63562368097	0.977471790025747	1.52373457237446e-47
ENSG00000114857	4820	NKTR	natural killer cell triggering receptor	1435.60324897813	0.866669888635491	1.68831571792646e-47
ENSG00000092964	1808	DPYSL2	dihydropyrimidinase like 2	1594.36400314458	-0.743388324626121	2.1682911516199e-47
ENSG00000165507	11067	DEPP1	DEPP1, autophagy regulator	284.426843022045	-1.84755811775519	2.35780395326638e-47
ENSG00000105048	7138	TNNT1	troponin T1, slow skeletal type	219.375202768035	-2.15277761892421	2.80162548062743e-47
ENSG00000143870	10130	PDIA6	protein disulfide isomerase family A member 6	4410.61407774194	-0.506836016539802	2.91774554753864e-47
ENSG00000136193	9805	SCRN1	secernin 1	5332.65027454695	-0.438153241530956	3.07633426112523e-47
ENSG00000234745	3106	HLA-B	major histocompatibility complex, class I, B	2329.70000560048	0.636638269825584	4.86348522660284e-47
ENSG00000238266	100507127	LINC00707	long intergenic non-protein coding RNA 707	109.398312388545	-3.92326475417212	5.30862084927252e-47
ENSG00000122591	84668	FAM126A	family with sequence similarity 126 member A	3845.50264590368	-0.499267721820182	5.86237778088254e-47
ENSG00000188042	10123	ARL4C	ADP ribosylation factor like GTPase 4C	5203.15280408129	-0.504670843388827	6.08668650198442e-47
ENSG00000182534	439921	MXRA7	matrix remodeling associated 7	2288.2022270766	-0.618363156725196	1.13267219184883e-46
ENSG00000172432	54676	GTPBP2	GTP binding protein 2	1460.3903836286	0.832606827946897	1.14956017022454e-46
ENSG00000117592	9588	PRDX6	peroxiredoxin 6	4292.7163669418	-0.490704322354746	1.16207482860264e-46
ENSG00000082497	56256	SERTAD4	SERTA domain containing 4	517.267893663176	-1.44317998253319	1.20477711194366e-46
ENSG00000064607	10147	SUGP2	SURP and G-patch domain containing 2	3492.32643948232	0.625442203919862	1.44753649965203e-46
ENSG00000011426	54443	ANLN	anillin actin binding protein	6498.95023614506	-0.48110250323286	2.01665619729078e-46
ENSG00000189403	3146	HMGB1	high mobility group box 1	4023.14840541232	-0.525600755594707	2.14697369396267e-46
ENSG00000224531	221710	SMIM13	small integral membrane protein 13	1449.64679143739	-0.748332155900056	2.30068032391095e-46
ENSG00000010278	928	CD9	CD9 molecule	2265.60016707339	-0.623614553119238	3.50003950187768e-46
ENSG00000265763	118738	ZNF488	zinc finger protein 488	129.252138925811	-2.95841132614383	3.60464983842659e-46
ENSG00000130702	3911	LAMA5	laminin subunit alpha 5	2921.20598294716	0.701096927933373	4.76036931563213e-46
ENSG00000174738	9975	NR1D2	nuclear receptor subfamily 1 group D member 2	1903.77126014037	0.763359273928349	5.85377805099727e-46
ENSG00000204681	2550	GABBR1	gamma-aminobutyric acid type B receptor subunit 1	658.13202657137	1.2429716027967	7.66119818640728e-46
ENSG00000176165	2290	FOXG1	forkhead box G1	2287.50834069896	-0.64602906852887	1.37410630938258e-45
ENSG00000116285	54206	ERRFI1	ERBB receptor feedback inhibitor 1	9043.31274749487	-0.835142037002332	1.44946503488482e-45
ENSG00000197261	135398	C6orf141	chromosome 6 open reading frame 141	617.549566035674	1.21008198143691	1.45199638127282e-45
ENSG00000129636	81533	ITFG1	integrin alpha FG-GAP repeat containing 1	2459.67746152678	-0.625655215481348	2.09030918751782e-45
ENSG00000188338	10991	SLC38A3	solute carrier family 38 member 3	2327.03579767743	-0.654236237008673	2.65939096515081e-45
ENSG00000136244	3569	IL6	interleukin 6	201.49034653713	-2.16645864041262	3.62178862340451e-45
ENSG00000125740	2354	FOSB	FosB proto-oncogene, AP-1 transcription factor subunit	663.153428097505	-3.75782839639911	4.00747423394966e-45
ENSG00000075213	10371	SEMA3A	semaphorin 3A	1342.30675044138	0.789408929042402	4.53940037580598e-45
ENSG00000214021	26140	TTLL3	tubulin tyrosine ligase like 3	286.355735239249	1.82519783308932	4.97097932273463e-45
ENSG00000107281	56654	NPDC1	neural proliferation, differentiation and control 1	663.764862072395	1.2130428525465	5.80463172106465e-45
ENSG00000197043	309	ANXA6	annexin A6	1590.31270426411	-0.723782642576371	6.21080059015508e-45
ENSG00000196154	6275	S100A4	S100 calcium binding protein A4	390.470511967488	-1.54375896419298	9.61992786928851e-45
ENSG00000214960	729920	ISPD	isoprenoid synthase domain containing	205.086078566301	-2.10621031972093	9.61992786928851e-45
ENSG00000079459	2222	FDFT1	farnesyl-diphosphate farnesyltransferase 1	2648.05593183024	-0.599167010028138	1.07957261768829e-44
ENSG00000151468	83643	CCDC3	coiled-coil domain containing 3	173.456196623014	-2.30874472977565	1.08623587873335e-44
ENSG00000129422	57509	MTUS1	microtubule associated scaffold protein 1	204.159681882409	2.47856132481166	1.13469279827666e-44
ENSG00000204767	100131897	FAM196B	family with sequence similarity 196 member B	265.875135654986	-1.79670136723093	1.67360624025935e-44
ENSG00000140564	5045	FURIN	furin, paired basic amino acid cleaving enzyme	3552.37791893447	-0.551044735360046	1.73434907541909e-44
ENSG00000040275	54908	SPDL1	spindle apparatus coiled-coil protein 1	2076.93659676275	-0.638867664825805	1.81228742514381e-44
ENSG00000074527	59277	NTN4	netrin 4	834.514619008292	-0.966555759228618	2.0273528546379e-44
ENSG00000151208	9231	DLG5	discs large MAGUK scaffold protein 5	2661.96702216742	0.572623116240155	2.09851633077595e-44
ENSG00000138834	23162	MAPK8IP3	mitogen-activated protein kinase 8 interacting protein 3	898.918317311278	1.03707019834665	2.1846339357235e-44
ENSG00000139645	283373	ANKRD52	ankyrin repeat domain 52	3141.99246989869	0.579873788324089	2.54125295766716e-44
ENSG00000133083	9201	DCLK1	doublecortin like kinase 1	876.402288694587	-0.978836498563413	3.3954062099896e-44
ENSG00000176978	29952	DPP7	dipeptidyl peptidase 7	1256.52276391648	0.837252603459876	4.33434155810844e-44
ENSG00000154678	5137	PDE1C	phosphodiesterase 1C	2704.51879890184	-0.64757991097907	5.74303040202313e-44
ENSG00000187954	50626	CYHR1	cysteine and histidine rich 1	816.258632558381	0.97843781878265	8.53120158430152e-44
ENSG00000105443	9266	CYTH2	cytohesin 2	1554.55378868961	0.782356790982336	9.56452526601186e-44
ENSG00000184743	25923	ATL3	atlastin GTPase 3	1238.22004057405	-0.838030098171039	1.13855917953287e-43
ENSG00000052802	6307	MSMO1	methylsterol monooxygenase 1	1606.09550642728	-0.721993954099087	1.28157206778851e-43
ENSG00000141258	9905	SGSM2	small G protein signaling modulator 2	843.803541849322	1.00567422361245	1.28157206778851e-43
ENSG00000114554	5361	PLXNA1	plexin A1	2170.47776040779	0.618255748477656	1.70449412970491e-43
ENSG00000126464	57479	PRR12	proline rich 12	1222.12546948104	0.797339470308584	2.32108419504585e-43
ENSG00000019549	6591	SNAI2	snail family transcriptional repressor 2	444.174131134501	-1.36640385501123	2.79538562724469e-43
ENSG00000129128	60559	SPCS3	signal peptidase complex subunit 3	2307.09480541721	-0.629506607059558	3.20104824811468e-43
ENSG00000185950	8660	IRS2	insulin receptor substrate 2	1013.53382766228	0.980312539725045	4.38587770369783e-43
ENSG00000118785	6696	SPP1	secreted phosphoprotein 1	5007.24772919378	0.50323943865161	5.22221719821029e-43
ENSG00000143545	5872	RAB13	RAB13, member RAS oncogene family	1658.19097709759	-0.719619714669233	5.2614849950445e-43
ENSG00000106052	8887	TAX1BP1	Tax1 binding protein 1	3456.69826721654	-0.52181891272611	6.40317870997133e-43
ENSG00000151012	23657	SLC7A11	solute carrier family 7 member 11	10413.0808286017	0.476167008045192	6.88163749335555e-43
ENSG00000089685	332	BIRC5	baculoviral IAP repeat containing 5	3098.81472844984	-0.536743337511199	7.14223292711809e-43
ENSG00000105519	828	CAPS	calcyphosine	12799.7205541479	-0.391134679737835	9.75398689218151e-43
ENSG00000198825	22876	INPP5F	inositol polyphosphate-5-phosphatase F	1565.93328247866	0.815828810070867	1.57860460821286e-42
ENSG00000161202	1857	DVL3	dishevelled segment polarity protein 3	1990.30005581544	0.709244106170623	1.66364951265778e-42
ENSG00000117984	1509	CTSD	cathepsin D	4516.67346361701	0.483670267172317	1.80088868917263e-42
ENSG00000115310	57142	RTN4	reticulon 4	8661.46818970485	-0.370576824219103	2.04133446852681e-42
ENSG00000115234	9784	SNX17	sorting nexin 17	1982.61993997464	-0.623190944521705	2.3467293835315e-42
ENSG00000160949	4796	TONSL	tonsoku like, DNA repair protein	631.899033609347	1.18786955655278	2.59844082274514e-42
ENSG00000115504	23301	EHBP1	EH domain binding protein 1	1604.74468528557	-0.71083326002637	2.80495900521806e-42
ENSG00000130723	84726	PRRC2B	proline rich coiled-coil 2B	3408.85031463567	0.549832019001179	2.80495900521806e-42
ENSG00000085733	2017	CTTN	cortactin	2950.31010168578	0.54796740039885	3.59727388593155e-42
ENSG00000171346	3866	KRT15	keratin 15	268.120100528875	-1.71996185511312	3.63227736838056e-42
ENSG00000272333	9757	KMT2B	lysine methyltransferase 2B	1548.42130763407	0.721647112019384	3.88044436227307e-42
ENSG00000102024	5358	PLS3	plastin 3	9051.59022721487	-0.424242979480982	7.63279353427582e-42
ENSG00000130881	4037	LRP3	LDL receptor related protein 3	1191.72857298548	0.791059964023729	9.50929736791722e-42
ENSG00000182628	348235	SKA2	spindle and kinetochore associated complex subunit 2	2619.3841018613	-0.580934078118322	1.01501781025482e-41
ENSG00000164877	79778	MICALL2	MICAL like 2	980.878886226964	0.941959660975661	1.09061692602719e-41
ENSG00000179604	23580	CDC42EP4	CDC42 effector protein 4	1115.08265415409	-0.805299287040651	1.12407323162004e-41
ENSG00000257093	57189	KIAA1147	KIAA1147	1605.77258374586	0.722258993153936	1.63302298070256e-41
ENSG00000009307	7812	CSDE1	cold shock domain containing E1	20491.7971298378	-0.329223206635629	1.69900157159246e-41
ENSG00000110660	54733	SLC35F2	solute carrier family 35 member F2	2423.27581975134	-0.597108907209353	1.72119249390987e-41
ENSG00000173193	54625	PARP14	poly(ADP-ribose) polymerase family member 14	1009.38432134389	-0.886728323332301	2.27936895054635e-41
ENSG00000026508	960	CD44	CD44 molecule (Indian blood group)	28254.3143622741	-0.385803473587701	2.82585295372976e-41
ENSG00000187653	7117	TMSB4XP8	TMSB4X Pseudogene 8	318.778804993754	1.76819186828927	3.57962105640108e-41
ENSG00000185432	25840	METTL7A	methyltransferase like 7A	901.250622842306	-0.932726731069188	3.6052534369583e-41
ENSG00000116133	1718	DHCR24	24-dehydrocholesterol reductase	11267.7411122784	-0.374879581119499	4.52944751619177e-41
ENSG00000149485	3992	FADS1	fatty acid desaturase 1	2722.31704290278	-0.546461042089243	5.67320085257504e-41
ENSG00000074855	57719	ANO8	anoctamin 8	1052.21944261809	0.89357741246396	8.19045867925762e-41
ENSG00000242086	727956	SDHAP2	succinate dehydrogenase complex flavoprotein subunit A pseudogene 2	276.866685496551	1.74485828173093	8.19045867925762e-41
ENSG00000096433	3710	ITPR3	inositol 1,4,5-trisphosphate receptor type 3	1987.01713554183	0.630877845726163	8.97046318571056e-41
ENSG00000065618	1308	COL17A1	collagen type XVII alpha 1 chain	815.747565790213	-1.00501581721489	9.48439911277065e-41
ENSG00000164418	2898	GRIK2	glutamate ionotropic receptor kainate type subunit 2	496.450419224048	1.26380556547852	1.1861251475465e-40
ENSG00000132470	3691	ITGB4	integrin subunit beta 4	7877.16539410003	-0.365589064177417	1.44163247621226e-40
ENSG00000182199	6472	SHMT2	serine hydroxymethyltransferase 2	2360.74316019708	0.647930680136607	1.44163247621226e-40
ENSG00000136603	6498	SKIL	SKI like proto-oncogene	1202.64106671761	-0.789325503672675	1.48297395528123e-40
ENSG00000156140	9508	ADAMTS3	ADAM metallopeptidase with thrombospondin type 1 motif 3	109.222698492887	4.09559808694315	1.86439990093057e-40
ENSG00000158106	114822	RHPN1	rhophilin Rho GTPase binding protein 1	277.710161088955	1.73383702574808	2.5182446442795e-40
ENSG00000100994	5834	PYGB	glycogen phosphorylase B	7351.70713603276	0.494295437672711	2.91867722480381e-40
ENSG00000122565	11335	CBX3	chromobox 3	5352.34590693523	-0.431007947360683	3.07312930046793e-40
ENSG00000001461	57185	NIPAL3	NIPA like domain containing 3	1454.03883431295	-0.718534731831783	3.59049127145498e-40
ENSG00000182551	55256	ADI1	acireductone dioxygenase 1	1540.9149997536	-0.690098730445058	4.53694963102018e-40
ENSG00000099814	283638	CEP170B	centrosomal protein 170B	1116.68414413877	0.831438102571853	9.16260659639405e-40
ENSG00000160131	203547	VMA21	VMA21, vacuolar ATPase assembly factor	1633.63539863056	-0.672091217937725	9.16260659639405e-40
ENSG00000008513	6482	ST3GAL1	ST3 beta-galactoside alpha-2,3-sialyltransferase 1	885.303179596649	0.962085103128692	9.75593258470486e-40
ENSG00000108107	6158	RPL28	ribosomal protein L28	8030.92987795604	-0.369835188693998	1.11405243593598e-39
ENSG00000134986	9315	NREP	neuronal regeneration related protein	752.943582601483	-1.01352431287316	1.20564549384256e-39
ENSG00000131095	2670	GFAP	glial fibrillary acidic protein	153.542574129367	-2.30464681096123	1.26951974609712e-39
ENSG00000068137	79990	PLEKHH3	pleckstrin homology, MyTH4 and FERM domain containing H3	483.695203619604	1.2402315990307	1.28443433038461e-39
ENSG00000160299	5116	PCNT	pericentrin	1830.16014609141	0.647707560800678	1.3109157609697e-39
ENSG00000133019	1131	CHRM3	cholinergic receptor muscarinic 3	256.255027594648	1.81328881319841	2.09452258883271e-39
ENSG00000118985	22936	ELL2	elongation factor for RNA polymerase II 2	1408.37340837068	-0.773607811757397	3.44779793282467e-39
ENSG00000111145	2004	ELK3	ELK3, ETS transcription factor	1891.50461881876	-0.61438847175898	3.44800839109282e-39
ENSG00000183255	754	PTTG1IP	PTTG1 interacting protein	3010.05756169782	-0.545422744223367	4.06291134019485e-39
ENSG00000168092	5049	PAFAH1B2	platelet activating factor acetylhydrolase 1b catalytic subunit 2	3527.78148585502	-0.489667079583696	4.54197209768585e-39
ENSG00000104763	427	ASAH1	N-acylsphingosine amidohydrolase 1	1689.47234745018	0.679205380057829	1.1163537102167e-38
ENSG00000006210	6376	CX3CL1	C-X3-C motif chemokine ligand 1	573.807407138575	1.20927299532761	1.46559687388192e-38
ENSG00000196159	79633	FAT4	FAT atypical cadherin 4	850.290656458479	0.912303611517007	1.56812821037465e-38
ENSG00000196739	85301	COL27A1	collagen type XXVII alpha 1 chain	543.16960838907	1.19020356951047	1.66912297054991e-38
ENSG00000132510	23135	KDM6B	lysine demethylase 6B	708.870267844536	0.996143100209299	1.71190607127747e-38
ENSG00000188643	140576	S100A16	S100 calcium binding protein A16	3081.10601470653	-0.515303046041574	1.85126209502439e-38
ENSG00000102038	6594	SMARCA1	SWI/SNF related, matrix associated, actin dependent regulator of chromatin, subfamily a, member 1	2225.35147205173	-0.577417012818474	2.14923037893848e-38
ENSG00000111669	7167	TPI1	triosephosphate isomerase 1	9938.40706187053	-0.353754950086768	2.55289297499408e-38
ENSG00000147119	56548	CHST7	carbohydrate sulfotransferase 7	647.389382735907	1.04210049431656	2.55289297499408e-38
ENSG00000136205	64759	TNS3	tensin 3	3597.72921356498	-0.554362646421123	3.79692030182656e-38
ENSG00000165476	221035	REEP3	receptor accessory protein 3	2242.78173002056	-0.62303179983135	4.07414143582929e-38
ENSG00000121716	29990	PILRB	paired immunoglobin-like type 2 receptor beta	196.958345201335	2.14668803710934	4.23862717882113e-38
ENSG00000152894	5796	PTPRK	protein tyrosine phosphatase, receptor type K	2333.40492100443	0.602804290626068	5.13566133522792e-38
ENSG00000120885	1191	CLU	clusterin	937.165775694643	-0.924134894754773	6.18689512223437e-38
ENSG00000134871	1284	COL4A2	collagen type IV alpha 2 chain	6179.47831123019	0.425213886093245	6.49891854709007e-38
ENSG00000187446	11261	CHP1	calcineurin like EF-hand protein 1	2740.02806024895	-0.510696429759789	6.8193372864383e-38
ENSG00000166987	114785	MBD6	methyl-CpG binding domain protein 6	621.431903643687	1.05061972026709	7.22835922455541e-38
ENSG00000109920	23360	FNBP4	formin binding protein 4	1304.70578641691	0.72392688089856	8.04815263898665e-38
ENSG00000101191	11083	DIDO1	death inducer-obliterator 1	1875.29947886499	0.644340851360277	9.24037876919969e-38
ENSG00000148400	4851	NOTCH1	notch 1	1673.98530880431	0.760852398956794	9.73512120515639e-38
ENSG00000177469	284119	CAVIN1	caveolae associated protein 1	6168.46754539434	-0.392490896460672	1.11545110397028e-37
ENSG00000187678	81848	SPRY4	sprouty RTK signaling antagonist 4	668.720560504545	1.0309410846044	1.15050045093516e-37
ENSG00000095564	9044	BTAF1	B-TFIID TATA-box binding protein associated factor 1	1668.69405671455	0.647435894166972	1.20816142595987e-37
ENSG00000175197	1649	DDIT3	DNA damage inducible transcript 3	169.103272247615	2.2312903158732	1.26613362793676e-37
ENSG00000092820	7430	EZR	ezrin	5688.87216804228	-0.416791361733106	1.45278833091112e-37
ENSG00000116754	9295	SRSF11	serine and arginine rich splicing factor 11	3052.10482305629	0.538425405461088	1.70611493218267e-37
ENSG00000071626	26528	DAZAP1	DAZ associated protein 1	2462.06422507628	0.545431618626152	2.3934685918968e-37
ENSG00000124098	116151	FAM210B	family with sequence similarity 210 member B	2074.16307036906	-0.614825750340027	3.08552183267492e-37
ENSG00000113407	6897	TARS	threonyl-tRNA synthetase	3687.57266406418	0.505682652071503	3.35573845105699e-37
ENSG00000140718	79068	FTO	FTO, alpha-ketoglutarate dependent dioxygenase	2653.42819715862	-0.526074917434696	3.40274028297081e-37
ENSG00000147162	8473	OGT	O-linked N-acetylglucosamine (GlcNAc) transferase	3180.88374703386	1.14216499092027	4.19980979331346e-37
ENSG00000103769	8766	RAB11A	RAB11A, member RAS oncogene family	3046.62377532145	-0.504152169583111	4.45548845311104e-37
ENSG00000168385	4735	SEPTIN2	septin 2	8949.55158170993	-0.338386406348511	6.23128812901826e-37
ENSG00000104332	6422	SFRP1	secreted frizzled related protein 1	1331.39278903501	-0.721393915180497	6.37423474355802e-37
ENSG00000148384	56623	INPP5E	inositol polyphosphate-5-phosphatase E	598.052465635022	1.09149575437692	6.45958015362637e-37
ENSG00000169604	84168	ANTXR1	anthrax toxin receptor 1	2365.20858730218	-0.560819682977015	7.08918013089781e-37
ENSG00000170500	164832	LONRF2	LON peptidase N-terminal domain and ring finger 2	338.110179147614	1.51043906819107	8.02324141927767e-37
ENSG00000137710	5962	RDX	radixin	6558.22997424471	-0.414732036259904	9.00401856576267e-37
ENSG00000162413	9903	KLHL21	kelch like family member 21	1822.53324706173	0.629784759820127	9.30036192319551e-37
ENSG00000112081	6428	SRSF3	serine and arginine rich splicing factor 3	5874.14013898555	-0.377040768312683	9.74414370995803e-37
ENSG00000085662	231	AKR1B1	aldo-keto reductase family 1 member B	3724.32320210064	-0.446369359990992	1.40057223452294e-36
ENSG00000188211	374383	NCR3LG1	natural killer cell cytotoxicity receptor 3 ligand 1	165.441980731917	2.25644142262706	1.90542887038436e-36
ENSG00000144746	10550	ARL6IP5	ADP ribosylation factor like GTPase 6 interacting protein 5	2041.73084224443	-0.615546254373833	1.9264262386757e-36
ENSG00000103966	30844	EHD4	EH domain containing 4	1888.47629329442	-0.59341027211847	2.22021101306274e-36
ENSG00000143669	1130	LYST	lysosomal trafficking regulator	1090.44793092694	0.815252657317057	2.25231423511201e-36
ENSG00000150093	3688	ITGB1	integrin subunit beta 1	8358.43672324284	-0.334801234279511	2.43340373736726e-36
ENSG00000196683	54543	TOMM7	translocase of outer mitochondrial membrane 7	1830.79413618446	-0.657443072554528	2.55306811888487e-36
ENSG00000165899	283310	OTOGL	otogelin like	163.061602609192	-2.10984959093763	2.6759028204815e-36
ENSG00000114302	5576	PRKAR2A	protein kinase cAMP-dependent type II regulatory subunit alpha	3205.48813225071	-0.489098034060411	3.35263720113956e-36
ENSG00000110047	10938	EHD1	EH domain containing 1	1373.48233493524	-0.689066432252114	3.60898198342595e-36
ENSG00000115875	6432	SRSF7	serine and arginine rich splicing factor 7	2299.8056003416	-0.539244210553825	3.97792589205034e-36
ENSG00000059377	6916	TBXAS1	thromboxane A synthase 1	372.698154392723	-1.31712413110968	4.47485791130839e-36
ENSG00000154803	201163	FLCN	folliculin	690.904428367298	0.972014130317144	6.63358810181827e-36
ENSG00000160075	29101	SSU72	SSU72 homolog, RNA polymerase II CTD phosphatase	1830.64395445082	-0.618917900788509	6.7674432893403e-36
ENSG00000148334	80142	PTGES2	prostaglandin E synthase 2	1133.35503320818	0.774089986844919	7.27950477062984e-36
ENSG00000172757	1072	CFL1	cofilin 1	11004.4087218637	-0.319068790857724	7.53361881938154e-36
ENSG00000091490	23231	SEL1L3	SEL1L family member 3	1957.71696126019	0.633267513431984	7.65198388273949e-36
ENSG00000122694	152007	GLIPR2	GLI pathogenesis related 2	699.669377113082	-0.959915807936932	8.73604826174487e-36
ENSG00000084623	8668	EIF3I	eukaryotic translation initiation factor 3 subunit I	5091.9387876808	-0.38985033648832	9.51126819221558e-36
ENSG00000067560	387	RHOA	ras homolog family member A	11761.5878259494	-0.302236968783678	1.18167334758234e-35
ENSG00000156687	137970	UNC5D	unc-5 netrin receptor D	146.412941738601	2.43443239461194	1.18317739102271e-35
ENSG00000140983	89941	RHOT2	ras homolog family member T2	1177.43863029198	0.755403272742894	1.26273047297457e-35
ENSG00000145907	10146	G3BP1	G3BP stress granule assembly factor 1	4822.43593706458	-0.434728463187038	1.26934678227525e-35
ENSG00000057019	131566	DCBLD2	discoidin, CUB and LCCL domain containing 2	15249.5988773145	-0.401050133975702	1.27529960720417e-35
ENSG00000065054	9351	SLC9A3R2	SLC9A3 regulator 2	1393.58486307659	-0.688155497648052	1.32549636097134e-35
ENSG00000127863	55504	TNFRSF19	TNF receptor superfamily member 19	1230.59042587483	-0.944387738165225	2.12562513190773e-35
ENSG00000110427	25758	KIAA1549L	KIAA1549 like	600.604125025344	-1.06857260722767	2.3217796727836e-35
ENSG00000088247	8570	KHSRP	KH-type splicing regulatory protein	7111.72033045436	0.37462499124154	2.46814351508562e-35
ENSG00000087253	54947	LPCAT2	lysophosphatidylcholine acyltransferase 2	1781.28435760733	-0.638231727251385	2.94440942595439e-35
ENSG00000131368	64432	MRPS25	mitochondrial ribosomal protein S25	657.144237726011	1.07589604565359	3.52985708289252e-35
ENSG00000116679	10625	IVNS1ABP	influenza virus NS1A binding protein	2535.47879362897	-0.544282630611433	4.91237530271944e-35
ENSG00000204525	3107	HLA-C	major histocompatibility complex, class I, C	2453.36737657197	0.551236634051045	5.26539494629969e-35
ENSG00000175471	79772	MCTP1	multiple C2 and transmembrane domain containing 1	201.486818249418	1.90832521114828	6.43758451690786e-35
ENSG00000074800	2023	ENO1	enolase 1	49260.5746512394	-0.256178798147923	7.03047146972409e-35
ENSG00000167767	144501	KRT80	keratin 80	1133.92443051178	-0.824510485386743	8.19187576691865e-35
ENSG00000163637	166336	PRICKLE2	prickle planar cell polarity protein 2	546.103467405681	-1.06035613732351	8.26716135956535e-35
ENSG00000049449	5954	RCN1	reticulocalbin 1	3163.11068188699	-0.484841056628856	9.88168837951479e-35
ENSG00000101224	994	CDC25B	cell division cycle 25B	3814.02226826075	0.47002408035433	1.00447382968568e-34
ENSG00000196628	6925	TCF4	transcription factor 4	1097.57094358266	-0.767147884223667	1.00447382968568e-34
ENSG00000072778	37	ACADVL	acyl-CoA dehydrogenase very long chain	4547.31275251162	0.434404744006902	1.10027162269174e-34
ENSG00000148341	56904	SH3GLB2	SH3 domain containing GRB2 like, endophilin B2	1293.40619277447	0.757245680779279	1.13618024520579e-34
ENSG00000136861	55755	CDK5RAP2	CDK5 regulatory subunit associated protein 2	1337.03813405477	0.728836317863586	1.28154192218696e-34
ENSG00000172380	55970	GNG12	G protein subunit gamma 12	3570.73084797692	-0.496072617327564	1.3881757496584e-34
ENSG00000065060	54887	UHRF1BP1	UHRF1 binding protein 1	955.68924458511	0.891079002960158	1.64347938531244e-34
ENSG00000003096	90293	KLHL13	kelch like family member 13	1349.4329982049	-0.72702146486072	1.75646727667197e-34
ENSG00000127824	7277	TUBA4A	tubulin alpha 4a	285.2198767749	-1.5474456613904	2.46901325784826e-34
ENSG00000168137	55209	SETD5	SET domain containing 5	3309.42070289225	0.480328802561989	2.50566945094089e-34
ENSG00000164442	10370	CITED2	Cbp/p300 interacting transactivator with Glu/Asp rich carboxy-terminal domain 2	711.638803447572	-0.901430414269415	2.79452130605922e-34
ENSG00000163191	6282	S100A11	S100 calcium binding protein A11	2985.29038952059	-0.492370377742839	3.28834315344116e-34
ENSG00000169504	25932	CLIC4	chloride intracellular channel 4	9624.07723879138	-0.340826319787956	3.33011311352765e-34
ENSG00000167658	1938	EEF2	eukaryotic translation elongation factor 2	48475.8678801189	0.283337952664064	3.42669825074767e-34
ENSG00000168056	4054	LTBP3	latent transforming growth factor beta binding protein 3	1115.15060497892	-0.762299735088175	3.55374604059145e-34
ENSG00000184347	6586	SLIT3	slit guidance ligand 3	193.9873461704	-1.84587083278432	3.84010178091209e-34
ENSG00000185551	7026	NR2F2	nuclear receptor subfamily 2 group F member 2	1062.47159953264	-0.799405586551912	4.59828801536448e-34
ENSG00000125912	56926	NCLN	nicalin	2718.40910836493	0.49857915721353	4.84152697131793e-34
ENSG00000128159	85378	TUBGCP6	tubulin gamma complex associated protein 6	797.477643468812	0.887096943209162	5.36462506997724e-34
ENSG00000110675	55531	ELMOD1	ELMO domain containing 1	545.079476263081	-1.04955158901448	5.46716815924463e-34
ENSG00000155366	389	RHOC	ras homolog family member C	2660.5030421193	-0.532912733346356	6.4360609638058e-34
ENSG00000165655	84858	ZNF503	zinc finger protein 503	834.217770173247	-0.835324530013058	8.30097402981075e-34
ENSG00000136938	10541	ANP32B	acidic nuclear phosphoprotein 32 family member B	2073.61541160347	0.570656253437299	1.1595225188792e-33
ENSG00000177084	5426	POLE	DNA polymerase epsilon, catalytic subunit	1423.25879734783	0.710840217108585	1.18084751753293e-33
ENSG00000163430	11167	FSTL1	follistatin like 1	2874.03496453628	-0.488720780171578	1.25632774493308e-33
ENSG00000235823	90271	OLMALINC	oligodendrocyte maturation-associated long intergenic non-coding RNA	289.572531873247	-1.41560195888647	1.29143874089142e-33
ENSG00000171444	4163	MCC	mutated in colorectal cancers	2427.04621551322	-0.53981783307867	1.54845891045118e-33
ENSG00000115468	80303	EFHD1	EF-hand domain family member D1	135.878693989891	-2.35714158494667	1.5878038779983e-33
ENSG00000188157	375790	AGRN	agrin	6094.62102901145	0.384478168334594	2.21693125129414e-33
ENSG00000131873	22856	CHSY1	chondroitin sulfate synthase 1	1498.02712328895	-0.646169488347418	2.31017862210544e-33
ENSG00000172348	10231	RCAN2	regulator of calcineurin 2	97.8180855936302	3.27626991050835	2.35438278347665e-33
ENSG00000108953	7531	YWHAE	tyrosine 3-monooxygenase/tryptophan 5-monooxygenase activation protein epsilon	13690.6537872693	-0.290040034762355	2.75265911472341e-33
ENSG00000178031	92949	ADAMTSL1	ADAMTS like 1	110.38234303216	-2.90989907995098	2.87140142146008e-33
ENSG00000004777	115703	ARHGAP33	Rho GTPase activating protein 33	733.150933127098	0.954753469480733	3.45647473387582e-33
ENSG00000115355	55704	CCDC88A	coiled-coil domain containing 88A	1776.66541783484	-0.61805729862798	3.90314378432001e-33
ENSG00000133466	114904	C1QTNF6	C1q and TNF related 6	386.481810191188	-1.28560574532437	4.03111272645531e-33
ENSG00000183840	2863	GPR39	G protein-coupled receptor 39	156.837722011387	-2.06768273597616	5.31128553884151e-33
ENSG00000100097	3956	LGALS1	galectin 1	7250.32951761061	-0.403478785770445	5.3207084936364e-33
ENSG00000154122	56172	ANKH	ANKH inorganic pyrophosphate transport regulator	3434.34897477969	-0.434021219849229	6.03904428632159e-33
ENSG00000141458	4864	NPC1	NPC intracellular cholesterol transporter 1	663.960642283259	0.943032341324743	6.52536788624238e-33
ENSG00000166289	79156	PLEKHF1	pleckstrin homology and FYVE domain containing 1	356.451725584181	1.31052498365136	1.04757435391409e-32
ENSG00000165458	3636	INPPL1	inositol polyphosphate phosphatase like 1	2202.77802448928	0.552275807692893	1.09254643340644e-32
ENSG00000138069	5861	RAB1A	RAB1A, member RAS oncogene family	3056.89155579801	-0.470275296805149	1.13093387747712e-32
ENSG00000058668	493	ATP2B4	ATPase plasma membrane Ca2+ transporting 4	2867.42347965878	-0.503611862188463	1.17660564333136e-32
ENSG00000132646	5111	PCNA	proliferating cell nuclear antigen	3684.58909446345	-0.436887470779968	1.32165747411685e-32
ENSG00000134186	55119	PRPF38B	pre-mRNA processing factor 38B	1101.52849077565	0.75509392505768	1.56626281809962e-32
ENSG00000183495	57634	EP400	E1A binding protein p400	1428.76118945816	0.756082630176013	1.77559502462451e-32
ENSG00000075945	22920	KIFAP3	kinesin associated protein 3	999.81867324557	-0.745200505646754	3.36090203071805e-32
ENSG00000132002	3337	DNAJB1	DnaJ heat shock protein family (Hsp40) member B1	4601.43868145416	-0.41234806532003	3.77633963076569e-32
ENSG00000089157	6175	RPLP0	ribosomal protein lateral stalk subunit P0	13710.3854602105	-0.307025625782503	4.01457855821365e-32
ENSG00000029534	286	ANK1	ankyrin 1	375.822412433336	-1.2493484605012	4.38017407073999e-32
ENSG00000160957	9401	RECQL4	RecQ like helicase 4	974.123568475401	0.769333089756337	4.88360299928335e-32
ENSG00000124479	4693	NDP	NDP, norrin cystine knot growth factor	1502.37405663082	-0.640522570925418	5.0977059679501e-32
ENSG00000104980	10469	TIMM44	translocase of inner mitochondrial membrane 44	855.280359195284	0.846495727087776	5.31929012278731e-32
ENSG00000005020	8935	SKAP2	src kinase associated phosphoprotein 2	1140.08961528806	-0.72038144760872	5.69493294787012e-32
ENSG00000128340	5880	RAC2	Rac family small GTPase 2	89.2192037199434	-2.94050142559457	5.70073590062961e-32
ENSG00000136813	23392	ECPAS	Ecm29 proteasome adaptor and scaffold	2311.4645958991	0.557817559634902	5.98851415742481e-32
ENSG00000123989	79586	CHPF	chondroitin polymerizing factor	2218.24608797044	0.572614726809572	6.20362424181957e-32
ENSG00000155761	200162	SPAG17	sperm associated antigen 17	87.7473732679211	-3.04743294189946	6.24782807855354e-32
ENSG00000115380	2202	EFEMP1	EGF containing fibulin extracellular matrix protein 1	7292.30665642039	-0.364271585193133	6.25689172916184e-32
ENSG00000104897	8175	SF3A2	splicing factor 3a subunit 2	1260.55397918836	0.687120352986949	6.83308244798602e-32
ENSG00000076716	2239	GPC4	glypican 4	2353.17471393154	0.602729329906144	7.52779557369089e-32
ENSG00000102265	7076	TIMP1	TIMP metallopeptidase inhibitor 1	1977.19385645175	-0.596947990782995	8.26960769420339e-32
ENSG00000072195	10290	SPEG	SPEG complex locus	546.427043296453	1.10916129807386	9.44614059308242e-32
ENSG00000165699	7248	TSC1	TSC complex subunit 1	607.643265087231	1.01006223198163	9.93581007134476e-32
ENSG00000171004	90161	HS6ST2	heparan sulfate 6-O-sulfotransferase 2	802.872535466684	0.90455524676425	1.17351807821049e-31
ENSG00000065308	9697	TRAM2	translocation associated membrane protein 2	2882.84438189727	-0.484948574876052	1.23861398261896e-31
ENSG00000186591	7328	UBE2H	ubiquitin conjugating enzyme E2 H	7032.58462749541	-0.373612747168149	1.37424791550823e-31
ENSG00000168672	157638	FAM84B	family with sequence similarity 84 member B	2991.19709764473	0.470827533711124	1.65955401994165e-31
ENSG00000188612	6613	SUMO2	small ubiquitin-like modifier 2	2182.67378385101	-0.537679763368317	1.65955401994165e-31
ENSG00000173153	2101	ESRRA	estrogen related receptor alpha	549.669773159358	1.01845739540969	1.6972480859571e-31
ENSG00000164292	22836	RHOBTB3	Rho related BTB domain containing 3	5311.86862394401	-0.452213874658797	1.82395644959594e-31
ENSG00000105329	7040	TGFB1	transforming growth factor beta 1	3936.76067661857	-0.431985087133389	1.84976193231385e-31
ENSG00000213064	375035	SFT2D2	SFT2 domain containing 2	1087.39777560517	-0.711824792345932	1.93952539086835e-31
ENSG00000155506	23367	LARP1	La ribonucleoprotein domain family member 1	6166.8161055446	0.386598687925563	1.97961338576205e-31
ENSG00000196642	55684	RABL6	RAB, member RAS oncogene family like 6	2243.23201605713	0.558625356124832	2.08936874449021e-31
ENSG00000140367	92912	UBE2Q2	ubiquitin conjugating enzyme E2 Q2	1199.26758013945	-0.666251130282555	2.47879919764091e-31
ENSG00000113719	57222	ERGIC1	endoplasmic reticulum-golgi intermediate compartment 1	3480.62374911341	-0.443359031674916	3.20063366552644e-31
ENSG00000152332	127933	UHMK1	U2AF homology motif kinase 1	3942.84820490512	-0.45936869406224	3.4077799946395e-31
ENSG00000135924	3300	DNAJB2	DnaJ heat shock protein family (Hsp40) member B2	1137.72678276404	-0.692450383131812	3.83560361223297e-31
ENSG00000135624	10574	CCT7	chaperonin containing TCP1 subunit 7	5316.77675615223	-0.373743074107879	4.5302362081561e-31
ENSG00000143947	6233	RPS27A	ribosomal protein S27a	5381.07531290248	-0.366352578489313	6.02058488663639e-31
ENSG00000104885	84444	DOT1L	DOT1 like histone lysine methyltransferase	1283.7185942234	0.687445251120142	7.46509902148361e-31
ENSG00000082641	4779	NFE2L1	nuclear factor, erythroid 2 like 1	5689.98792796265	0.401227928127914	7.64555260876588e-31
ENSG00000170549	79192	IRX1	iroquois homeobox 1	709.022299866476	0.885428487904887	8.16399752003528e-31
ENSG00000099860	4616	GADD45B	growth arrest and DNA damage inducible beta	369.898002643108	-1.23982975743086	8.33404819174863e-31
ENSG00000125534	79144	PPDPF	pancreatic progenitor cell differentiation and proliferation factor	2642.72313463582	0.480819049590667	8.34953406500053e-31
ENSG00000182220	10159	ATP6AP2	ATPase H+ transporting accessory protein 2	3473.24481002583	-0.464249059147416	1.13838253618958e-30
ENSG00000184486	5454	POU3F2	POU class 3 homeobox 2	3246.01279351646	-0.443091858668819	1.18286790132727e-30
ENSG00000145536	170690	ADAMTS16	ADAM metallopeptidase with thrombospondin type 1 motif 16	1384.65842839694	0.705219435556768	1.18586369459538e-30
ENSG00000163453	3490	IGFBP7	insulin like growth factor binding protein 7	5592.67861714385	0.43792295299491	1.23225344664936e-30
ENSG00000127418	53834	FGFRL1	fibroblast growth factor receptor like 1	8862.86257457569	0.362310673738625	1.5165964682782e-30
ENSG00000140416	7168	TPM1	tropomyosin 1	3719.61753349587	-0.446372677999558	1.5165964682782e-30
ENSG00000061938	10188	TNK2	tyrosine kinase non receptor 2	1248.92789639922	0.703282397269753	1.81395121530252e-30
ENSG00000164125	51313	FAM198B	family with sequence similarity 198 member B	7087.84798452582	-0.357820340634547	1.92032473566027e-30
ENSG00000112139	266727	MDGA1	MAM domain containing glycosylphosphatidylinositol anchor 1	831.952837800203	-0.790120137246376	1.97135017856665e-30
ENSG00000014641	4190	MDH1	malate dehydrogenase 1	2579.96833812928	-0.473255788029864	2.01650636237707e-30
ENSG00000166925	81628	TSC22D4	TSC22 domain family member 4	869.719855797475	0.813181152852008	2.38776256319756e-30
ENSG00000106355	23658	LSM5	LSM5 homolog, U6 small nuclear RNA and mRNA degradation associated	1195.48312913119	-0.66634910231668	2.41245083427992e-30
ENSG00000248905	342184	FMN1	formin 1	461.17335694752	1.12631435262425	2.79917765015823e-30
ENSG00000067057	5214	PFKP	phosphofructokinase, platelet	3454.46777326246	0.43598406803629	4.3796422367199e-30
ENSG00000054392	55733	HHAT	hedgehog acyltransferase	240.377740882974	-1.67861216644946	5.75558777612152e-30
ENSG00000205213	55366	LGR4	leucine rich repeat containing G protein-coupled receptor 4	1745.84286321822	-0.566226316373204	6.35832089941978e-30
ENSG00000250067	374887	YJEFN3	YjeF N-terminal domain containing 3	92.1805721669975	3.09002516226986	6.44655414109697e-30
ENSG00000123908	27161	AGO2	argonaute 2, RISC catalytic component	1207.92102662832	0.71087309692799	6.69341826040152e-30
ENSG00000198522	11321	GPN1	GPN-loop GTPase 1	848.374565715843	-0.799242805231974	7.68335056407501e-30
ENSG00000182087	91304	TMEM259	transmembrane protein 259	2317.37545378846	0.515278742162605	8.18912475338135e-30
ENSG00000178776	389336	C5orf46	chromosome 5 open reading frame 46	218.134521257033	-1.54875361470425	8.6117476595451e-30
ENSG00000163660	57018	CCNL1	cyclin L1	797.507908199388	0.891026682168839	9.40496803529157e-30
ENSG00000171055	9637	FEZ2	fasciculation and elongation protein zeta 2	1419.02350528527	-0.66292842702474	9.57412736092884e-30
ENSG00000198642	55958	KLHL9	kelch like family member 9	1728.1521457693	-0.555016847001235	1.02516127747937e-29
ENSG00000147231	55086	CXorf57	chromosome X open reading frame 57	90.8950945390679	3.12644288926655	1.17902782949068e-29
ENSG00000108091	8030	CCDC6	coiled-coil domain containing 6	1808.85725760802	-0.564555668011318	1.32708440362275e-29
ENSG00000138085	51374	ATRAID	all-trans retinoic acid induced differentiation factor	890.121704124475	-0.789993490660737	1.43319801810176e-29
ENSG00000173918	114897	C1QTNF1	C1q and TNF related 1	606.165251095395	-0.92235036481566	1.63164527232021e-29
ENSG00000117616	57035	RSRP1	arginine and serine rich protein 1	776.931330593803	0.8922717249236	1.72948639881247e-29
ENSG00000117152	5999	RGS4	regulator of G protein signaling 4	819.790061662861	0.831798360250257	1.97080448449283e-29
ENSG00000075415	5250	SLC25A3	solute carrier family 25 member 3	6256.77112311613	-0.349868724098594	2.24983309829565e-29
ENSG00000196182	83931	STK40	serine/threonine kinase 40	1051.37275455916	0.728645906081895	2.34945704016803e-29
ENSG00000167996	2495	FTH1	ferritin heavy chain 1	4314.8603755626	0.405877746780609	2.48955098739378e-29
ENSG00000070404	10272	FSTL3	follistatin like 3	936.065842931072	-0.774389159112593	2.52445292143936e-29
ENSG00000178951	51341	ZBTB7A	zinc finger and BTB domain containing 7A	1234.42092569793	0.684574198844937	2.56586390647573e-29
ENSG00000154845	9989	PPP4R1	protein phosphatase 4 regulatory subunit 1	2931.45373049377	-0.457447007703266	2.57834037125238e-29
ENSG00000179242	1002	CDH4	cadherin 4	3308.47605717861	-0.49539485315169	3.20200126950665e-29
ENSG00000119280	84886	C1orf198	chromosome 1 open reading frame 198	1059.49381221502	-0.680840519594127	3.5471353037649e-29
ENSG00000146535	2768	GNA12	G protein subunit alpha 12	2971.53882170851	-0.429589541273603	3.85719704736788e-29
ENSG00000111897	57515	SERINC1	serine incorporator 1	4710.98013644067	-0.388490095162673	3.87772941602793e-29
ENSG00000198198	23334	SZT2	SZT2, KICSTOR complex subunit	819.459823699414	0.824964415304464	3.87772941602793e-29
ENSG00000165233	84270	CARD19	caspase recruitment domain family member 19	278.291924507884	1.41853395242964	4.06389643587331e-29
ENSG00000095319	23511	NUP188	nucleoporin 188	2648.74761784538	0.496444184180986	4.39141763761289e-29
ENSG00000106976	1759	DNM1	dynamin 1	705.398771033876	0.891449772254871	4.46323027700078e-29
ENSG00000139793	10150	MBNL2	muscleblind like splicing regulator 2	1369.42713695939	-0.631756136543718	5.35621964314759e-29
ENSG00000128342	3976	LIF	LIF, interleukin 6 family cytokine	454.717367866683	-1.24034452200615	5.37932786073384e-29
ENSG00000123983	2181	ACSL3	acyl-CoA synthetase long chain family member 3	2857.39112708296	-0.453382262688695	6.0258303214939e-29
ENSG00000112335	8724	SNX3	sorting nexin 3	3942.96433575029	-0.440146963205234	6.5359616715662e-29
ENSG00000198898	830	CAPZA2	capping actin protein of muscle Z-line alpha subunit 2	2604.77172211372	-0.506115049307951	7.07840388444992e-29
ENSG00000204469	7916	PRRC2A	proline rich coiled-coil 2A	8377.94291595925	0.326030822698208	7.60402870022821e-29
ENSG00000164683	23462	HEY1	hes related family bHLH transcription factor with YRPW motif 1	373.803296826692	1.24815913238494	7.79667515741904e-29
ENSG00000081189	4208	MEF2C	myocyte enhancer factor 2C	1153.02518812165	-0.759842597500231	8.24987589308028e-29
ENSG00000019144	23187	PHLDB1	pleckstrin homology like domain family B member 1	1995.45327705482	-0.516537180771993	8.55997710952898e-29
ENSG00000110367	1656	DDX6	DEAD-box helicase 6	3375.15603829313	-0.446819815216171	8.88517466031991e-29
ENSG00000231925	6892	TAPBP	TAP binding protein	2187.06714749393	-0.493068387059613	9.15952975471774e-29
ENSG00000138757	9908	G3BP2	G3BP stress granule assembly factor 2	5883.94642795023	-0.368287404052835	1.11842347283933e-28
ENSG00000278709	105416157	NKILA	NF-kappaB interacting lncRNA	128.798339527761	-2.09267833149879	1.30734444873266e-28
ENSG00000196517	6536	SLC6A9	solute carrier family 6 member 9	462.459861502416	1.06207584600593	1.68126202905007e-28
ENSG00000165119	3190	HNRNPK	heterogeneous nuclear ribonucleoprotein K	10810.2252167851	-0.271301396198883	1.87733476478141e-28
ENSG00000181523	6448	SGSH	N-sulfoglucosamine sulfohydrolase	382.682102509628	1.17231032942732	1.9727837914269e-28
ENSG00000002586	4267	CD99	CD99 molecule (Xg blood group)	4954.22974944056	-0.357589307354293	2.2087953471498e-28
ENSG00000179869	154664	ABCA13	ATP binding cassette subfamily A member 13	376.106141394648	1.16502912111154	2.27097335336708e-28
ENSG00000234616	8629	JRK	Jrk helix-turn-helix protein	340.337720717928	1.26239492837407	2.30956001257656e-28
ENSG00000118680	103910	MYL12B	myosin light chain 12B	4697.59170699625	-0.417710872903587	2.33989581902559e-28
ENSG00000132274	10346	TRIM22	tripartite motif containing 22	219.732605901841	-1.53113901743759	2.47101155079429e-28
ENSG00000106049	11112	HIBADH	3-hydroxyisobutyrate dehydrogenase	703.020785755482	-0.863257872251375	2.5894199991358e-28
ENSG00000109654	23321	TRIM2	tripartite motif containing 2	8836.13442056225	-0.300867408892629	2.6798341101925e-28
ENSG00000103326	6650	CAPN15	calpain 15	830.792979846093	0.800271182997632	3.01581101689633e-28
ENSG00000166165	1152	CKB	creatine kinase B	5741.51443206362	-0.339654410323953	3.07097655720566e-28
ENSG00000162066	51005	AMDHD2	amidohydrolase domain containing 2	225.388224297571	1.59620110715474	3.7395390355638e-28
ENSG00000169905	163590	TOR1AIP2	torsin 1A interacting protein 2	1267.57072952274	-0.648770805242524	3.98741001687988e-28
ENSG00000142875	5567	PRKACB	protein kinase cAMP-activated catalytic subunit beta	1434.55117221917	-0.61090639999899	4.24622767930763e-28
ENSG00000110917	9761	MLEC	malectin	3879.21093556022	-0.385064769090628	4.57092197071609e-28
ENSG00000213699	54978	SLC35F6	solute carrier family 35 member F6	964.088871486149	-0.737859885763257	5.11258300259799e-28
ENSG00000148343	84895	MIGA2	mitoguardin 2	512.542578021635	0.99168193679188	5.36142981834659e-28
ENSG00000129103	25870	SUMF2	sulfatase modifying factor 2	2387.6359596422	-0.498612487208022	5.63236868137972e-28
ENSG00000261236	23246	BOP1	block of proliferation 1	1448.81008982698	0.632969110269081	6.4429046582676e-28
ENSG00000055483	57602	USP36	ubiquitin specific peptidase 36	1128.65818275654	0.708341095862679	6.49610855437684e-28
ENSG00000115866	1615	DARS	aspartyl-tRNA synthetase	1598.25654382203	-0.582266136418376	7.58440574220611e-28
ENSG00000166900	6809	STX3	syntaxin 3	511.706155487925	0.977678749115982	7.64055036435952e-28
ENSG00000137818	6176	RPLP1	ribosomal protein lateral stalk subunit P1	14545.8109201042	-0.301894318124728	8.58851592903989e-28
ENSG00000075618	6624	FSCN1	fascin actin-bundling protein 1	3573.21063317084	-0.425195460160687	1.14157783968327e-27
ENSG00000086232	27102	EIF2AK1	eukaryotic translation initiation factor 2 alpha kinase 1	4031.79296443669	-0.367949050793292	1.14501334016252e-27
ENSG00000161010	51149	MRNIP	MRN complex interacting protein	317.487519902909	1.26561820948846	1.29613266299344e-27
ENSG00000168090	10980	COPS6	COP9 signalosome subunit 6	2524.37423704357	-0.48175700438112	1.41361465903194e-27
ENSG00000136628	2058	EPRS	glutamyl-prolyl-tRNA synthetase	5118.48057649676	0.357640114269692	1.42547358170333e-27
ENSG00000073921	8301	PICALM	phosphatidylinositol binding clathrin assembly protein	3387.72317437358	-0.401819823616436	1.46311301960369e-27
ENSG00000197586	955	ENTPD6	ectonucleoside triphosphate diphosphohydrolase 6 (putative)	1196.83785006921	0.687629240696521	1.54191475108824e-27
ENSG00000165029	19	ABCA1	ATP binding cassette subfamily A member 1	1212.56086281026	0.694275303324325	1.56641734682447e-27
ENSG00000010322	11188	NISCH	nischarin	1409.85154101605	0.621086174978056	1.69558156413244e-27
ENSG00000005206	56928	SPPL2B	signal peptide peptidase like 2B	635.080580839561	0.993913781318056	2.00958379133566e-27
ENSG00000104635	23516	SLC39A14	solute carrier family 39 member 14	1502.44961586061	0.581202563123838	2.06906877693531e-27
ENSG00000101955	8406	SRPX	sushi repeat containing protein, X-linked	1479.57457939558	-0.617089049268297	2.2186450798709e-27
ENSG00000138193	51196	PLCE1	phospholipase C epsilon 1	833.480598151783	-0.815977058461461	2.25645973757014e-27
ENSG00000168077	51435	SCARA3	scavenger receptor class A member 3	646.544293567448	-0.879569263867291	2.3750913547514e-27
ENSG00000008282	6856	SYPL1	synaptophysin like 1	2748.61475882376	-0.490575852019962	3.09646764318644e-27
ENSG00000139514	6541	SLC7A1	solute carrier family 7 member 1	2830.32403374494	0.513816829041695	3.47903557012692e-27
ENSG00000147454	51312	SLC25A37	solute carrier family 25 member 37	838.094531893009	0.815904683409049	3.85181635390449e-27
ENSG00000214114	26292	MYCBP	MYC binding protein	311.108661143524	-1.25069124542083	3.9900740642064e-27
ENSG00000140451	80119	PIF1	PIF1 5'-to-3' DNA helicase	469.89961409572	1.01499366124775	4.07407247100248e-27
ENSG00000156531	84295	PHF6	PHD finger protein 6	1754.76857025594	-0.555645600713256	4.44504962853774e-27
ENSG00000185269	147111	NOTUM	notum, palmitoleoyl-protein carboxylesterase	142.554123394331	-2.1059033075295	4.7715434859621e-27
ENSG00000075826	25956	SEC31B	SEC31 homolog B, COPII coat complex component	241.530656872057	1.45862728912115	4.85416234563285e-27
ENSG00000106628	5425	POLD2	DNA polymerase delta 2, accessory subunit	3093.47316361482	-0.434742991721603	5.54242197065018e-27
ENSG00000143727	52	ACP1	acid phosphatase 1	1484.36295235946	-0.566560192226546	6.77145679083552e-27
ENSG00000054654	23224	SYNE2	spectrin repeat containing nuclear envelope protein 2	1757.82995891888	0.660619304218459	7.82667130199129e-27
ENSG00000130402	81	ACTN4	actinin alpha 4	30722.344532132	-0.232146914970656	7.93888706454824e-27
ENSG00000242802	9907	AP5Z1	adaptor related protein complex 5 zeta 1 subunit	746.266142498125	0.793945836980378	8.83488521144258e-27
ENSG00000186340	7058	THBS2	thrombospondin 2	626.280441517911	1.01950382147227	1.0404515356277e-26
ENSG00000179010	93621	MRFAP1	Morf4 family associated protein 1	9078.56291554914	-0.288195872359291	1.05659186103125e-26
ENSG00000152465	9397	NMT2	N-myristoyltransferase 2	575.306633950252	-0.892116833896917	1.13801000774798e-26
ENSG00000132824	10955	SERINC3	serine incorporator 3	3562.1575367718	-0.411910076293614	1.17150326099347e-26
ENSG00000168036	1499	CTNNB1	catenin beta 1	9978.21184642603	-0.26805355151347	1.26593260761904e-26
ENSG00000136158	10253	SPRY2	sprouty RTK signaling antagonist 2	619.928168872838	0.879583904764237	1.35430573251044e-26
ENSG00000126012	8242	KDM5C	lysine demethylase 5C	3323.8801531437	0.395870040226457	1.52554325760342e-26
ENSG00000176046	26471	NUPR1	nuclear protein 1, transcriptional regulator	211.371941849734	1.56155656112052	1.80792468317043e-26
ENSG00000203485	64423	INF2	inverted formin, FH2 and WH2 domain containing	2029.50051857948	0.530185168527931	1.85696557294082e-26
ENSG00000197119	123096	SLC25A29	solute carrier family 25 member 29	542.133442245465	0.936617986903143	2.01543883721443e-26
ENSG00000162409	5563	PRKAA2	protein kinase AMP-activated catalytic subunit alpha 2	93.1509738099919	5.88559687117301	2.14237514292188e-26
ENSG00000088986	8655	DYNLL1	dynein light chain LC8-type 1	2427.29714543182	-0.448620686258263	2.42585509484697e-26
ENSG00000104765	665	BNIP3L	BCL2 interacting protein 3 like	1807.6317557225	-0.553141485152842	2.48353760993743e-26
ENSG00000149294	4684	NCAM1	neural cell adhesion molecule 1	1505.6903388396	-0.709068451833262	2.70059668282293e-26
ENSG00000065000	8943	AP3D1	adaptor related protein complex 3 delta 1 subunit	4175.82634980785	0.410881464672084	2.81152354547967e-26
ENSG00000159200	1827	RCAN1	regulator of calcineurin 1	2012.91668287956	-0.638767959438558	2.87502413264147e-26
ENSG00000225614	84627	ZNF469	zinc finger protein 469	345.086790544878	1.19637310994248	2.98553527936197e-26
ENSG00000145934	57451	TENM2	teneurin transmembrane protein 2	4974.28826177174	-0.446505476582724	3.00761343035177e-26
ENSG00000182054	3418	IDH2	isocitrate dehydrogenase (NADP(+)) 2, mitochondrial	1220.37611804612	-0.641648305000481	3.22508981927574e-26
ENSG00000092841	4637	MYL6	myosin light chain 6	7738.84009110274	-0.329583971044796	3.33206174801229e-26
ENSG00000003756	10181	RBM5	RNA binding motif protein 5	1030.72205655455	0.696379885346896	3.50500571481111e-26
ENSG00000103168	9013	TAF1C	TATA-box binding protein associated factor, RNA polymerase I subunit C	698.219892897216	0.852937260804618	3.99803515737047e-26
ENSG00000165389	171546	SPTSSA	serine palmitoyltransferase small subunit A	1365.34299222616	-0.609866465838958	4.26185883487509e-26
ENSG00000135596	64780	MICAL1	microtubule associated monooxygenase, calponin and LIM domain containing 1	1043.06330528747	0.666113411978887	4.98240306790201e-26
ENSG00000101856	10857	PGRMC1	progesterone receptor membrane component 1	3775.24802282836	-0.382827949045939	5.41265690196383e-26
ENSG00000120053	2805	GOT1	glutamic-oxaloacetic transaminase 1	1128.7393208647	0.653057397377293	6.12200854586965e-26
ENSG00000234741	60674	GAS5	growth arrest specific 5 (non-protein coding)	983.833723776217	0.692356661859457	6.54856384208124e-26
ENSG00000100345	4627	MYH9	myosin heavy chain 9	20286.5431329871	0.2597722364225	7.1002592550087e-26
ENSG00000089351	57655	GRAMD1A	GRAM domain containing 1A	1730.06641620825	0.56546107310633	7.21734697921924e-26
ENSG00000015676	23386	NUDCD3	NudC domain containing 3	2325.23066865819	-0.448047270763167	7.45788543559103e-26
ENSG00000197694	6709	SPTAN1	spectrin alpha, non-erythrocytic 1	3789.90776444153	0.376171934943242	8.22524735232065e-26
ENSG00000204839	642475	MROH6	maestro heat like repeat family member 6	74.2812910592823	3.52392045431123	8.99788489090903e-26
ENSG00000059804	6515	SLC2A3	solute carrier family 2 member 3	734.067436428712	0.914010997335702	9.12828556869784e-26
ENSG00000278259	80179	MYO19	myosin XIX	1143.07242429381	0.658466713583859	9.74387968812811e-26
ENSG00000107404	1855	DVL1	dishevelled segment polarity protein 1	1359.05237779766	0.620340481271757	1.01031855308493e-25
ENSG00000111639	51258	MRPL51	mitochondrial ribosomal protein L51	1474.88493574957	-0.579390087117928	1.17643157489554e-25
ENSG00000170540	23204	ARL6IP1	ADP ribosylation factor like GTPase 6 interacting protein 1	4835.78565433241	-0.386028540624696	1.19976807839088e-25
ENSG00000116171	6342	SCP2	sterol carrier protein 2	2092.19016051775	-0.508889785171849	1.320374473957e-25
ENSG00000157106	23049	SMG1	SMG1, nonsense mediated mRNA decay associated PI3K related kinase	2104.09496102358	0.591143257336967	1.34224855936213e-25
ENSG00000182325	26233	FBXL6	F-box and leucine rich repeat protein 6	321.104179344271	1.19612602803451	1.37737046550953e-25
ENSG00000064932	22904	SBNO2	strawberry notch homolog 2	1651.55100953296	0.578613314702731	1.3883884270891e-25
ENSG00000167962	90850	ZNF598	zinc finger protein 598	812.680954179326	0.803025173509293	1.45404572580256e-25
ENSG00000255690	9865	TRIL	TLR4 interactor with leucine rich repeats	555.758288418608	-0.889439283886822	1.46905179653349e-25
ENSG00000111110	57460	PPM1H	protein phosphatase, Mg2+/Mn2+ dependent 1H	72.2456249455395	4.77833969956553	1.52034963881366e-25
ENSG00000214655	23053	ZSWIM8	zinc finger SWIM-type containing 8	1003.9646918347	0.708093221975859	1.53806895296154e-25
ENSG00000010256	7384	UQCRC1	ubiquinol-cytochrome c reductase core protein 1	6762.95470939942	-0.301189262412181	1.78569395317693e-25
ENSG00000180611	151963	MB21D2	Mab-21 domain containing 2	187.868761147025	-1.53710296045996	1.82991731401472e-25
ENSG00000148848	8038	ADAM12	ADAM metallopeptidase domain 12	4670.75858840372	0.379385527530551	1.90104829386103e-25
ENSG00000185800	1762	DMWD	DM1 locus, WD repeat containing	1494.88190397738	0.557081560937591	2.03351151687821e-25
ENSG00000038274	27430	MAT2B	methionine adenosyltransferase 2B	1723.61506567538	-0.513789757525797	2.13629837583449e-25
ENSG00000145741	689	BTF3	basic transcription factor 3	5696.78109611626	-0.312491945666178	2.3407430310748e-25
ENSG00000163762	116441	TM4SF18	transmembrane 4 L six family member 18	87.417572023394	-2.43894224536259	2.46716061216422e-25
ENSG00000125991	51614	ERGIC3	ERGIC and golgi 3	3431.45305737376	-0.396672662445429	3.05770518725404e-25
ENSG00000103253	84264	HAGHL	hydroxyacylglutathione hydrolase like	186.00967547508	1.75442063635286	3.19852527994514e-25
ENSG00000010270	83930	STARD3NL	STARD3 N-terminal like	1353.99280413282	-0.56714233582164	3.39114237078513e-25
ENSG00000134369	89796	NAV1	neuron navigator 1	1393.23324466818	-0.587299462572122	3.43263979284805e-25
ENSG00000171843	4300	MLLT3	MLLT3, super elongation complex subunit	328.611537861641	-1.13470894570832	3.56390806798323e-25
ENSG00000075702	284403	WDR62	WD repeat domain 62	1123.0800390674	0.65900365361384	3.63876866811177e-25
ENSG00000115561	51652	CHMP3	charged multivesicular body protein 3	1226.93854281236	-0.692773349074964	3.74198990188246e-25
ENSG00000036054	55773	TBC1D23	TBC1 domain family member 23	907.996199706911	-0.735514607519207	4.38822548237955e-25
ENSG00000025039	58528	RRAGD	Ras related GTP binding D	892.509869152431	0.70733153417806	5.13463036369472e-25
ENSG00000243317	647087	STMP1	short transmembrane mitochondrial protein 1	1472.04104900824	-0.550797754173485	5.18130823574997e-25
ENSG00000108256	57532	NUFIP2	NUFIP2, FMR1 interacting protein 2	2948.72767730308	0.451634588582823	5.29253976241763e-25
ENSG00000149948	8091	HMGA2	high mobility group AT-hook 2	528.414546096758	0.966865202477367	5.50090826913101e-25
ENSG00000102804	8848	TSC22D1	TSC22 domain family member 1	2738.07621839712	-0.433714640800783	5.5212048408002e-25
ENSG00000111328	8099	CDK2AP1	cyclin dependent kinase 2 associated protein 1	2097.97069827482	-0.528535519760037	7.17861054290586e-25
ENSG00000137504	58487	CREBZF	CREB/ATF bZIP transcription factor	902.874581174024	0.86548949687536	7.54002801451399e-25
ENSG00000111676	1822	ATN1	atrophin 1	2386.3330164863	0.447980111461282	7.847918639063e-25
ENSG00000139921	81542	TMX1	thioredoxin related transmembrane protein 1	2116.83531926852	-0.487343865090383	7.96016950435897e-25
ENSG00000135164	9988	DMTF1	cyclin D binding myb like transcription factor 1	985.865886233585	0.715495639933289	8.86183404805296e-25
ENSG00000084093	5978	REST	RE1 silencing transcription factor	1241.23773553847	-0.625069060325653	1.01010486004523e-24
ENSG00000084234	334	APLP2	amyloid beta precursor like protein 2	13960.5533944925	-0.24563455625113	1.03137144509134e-24
ENSG00000185215	7127	TNFAIP2	TNF alpha induced protein 2	1234.1864996879	0.630095930216435	1.11640315625012e-24
ENSG00000005889	7543	ZFX	zinc finger protein, X-linked	1199.65373357575	-0.604512706481992	1.35313311861917e-24
ENSG00000183291	9403	SELENOF	selenoprotein F	2968.02727383204	-0.428539864749759	1.35388548133612e-24
ENSG00000197102	1778	DYNC1H1	dynein cytoplasmic 1 heavy chain 1	10426.9926024659	0.714828273266542	1.42699140937474e-24
ENSG00000113739	8614	STC2	stanniocalcin 2	96.597697446229	2.49235155594865	1.47923636896651e-24
ENSG00000125844	6238	RRBP1	ribosome binding protein 1	4413.84193876829	0.405840324131157	1.54138796645726e-24
ENSG00000124172	514	ATP5F1E	ATP synthase F1 subunit epsilon	2716.87887599521	-0.436060467049257	1.57638398321895e-24
ENSG00000124767	2739	GLO1	glyoxalase I	4389.73559842549	-0.358207805096593	1.71910117230955e-24
ENSG00000111799	1303	COL12A1	collagen type XII alpha 1 chain	1080.63642379495	0.682836183615024	1.72804383663959e-24
ENSG00000198034	6191	RPS4X	ribosomal protein S4, X-linked	13341.8154639956	-0.234832295209451	1.73962361130395e-24
ENSG00000148773	4288	MKI67	marker of proliferation Ki-67	12199.3425122438	0.342704584956007	1.75723693152707e-24
ENSG00000187955	7373	COL14A1	collagen type XIV alpha 1 chain	77.6480229395743	2.96224138777007	1.91371868222444e-24
ENSG00000052850	60529	ALX4	ALX homeobox 4	194.807966129061	1.63360213519073	1.96911328707036e-24
ENSG00000215252	440270	GOLGA8B	golgin A8 family member B	303.075549647588	1.19250991330707	2.01712509023734e-24
ENSG00000106948	80709	AKNA	AT-hook transcription factor	239.356405429851	1.37800711017265	2.23681122483637e-24
ENSG00000108861	1845	DUSP3	dual specificity phosphatase 3	1752.92399191062	0.508064926831867	2.32581875993327e-24
ENSG00000133026	4628	MYH10	myosin heavy chain 10	2779.56165473352	0.408039758217591	2.59674151460022e-24
ENSG00000178950	2580	GAK	cyclin G associated kinase	1896.22779304239	0.526540099000496	2.89430461727712e-24
ENSG00000167615	114823	LENG8	leukocyte receptor cluster member 8	4212.23198720625	1.74622254349878	3.83241741178867e-24
ENSG00000140332	7090	TLE3	transducin like enhancer of split 3	1159.53705220243	-0.647048996901555	4.56128496337208e-24
ENSG00000008294	9043	SPAG9	sperm associated antigen 9	3149.94178463279	0.386866052948902	4.77739676460038e-24
ENSG00000178695	115207	KCTD12	potassium channel tetramerization domain containing 12	1036.74768795953	-0.630529985647757	4.80689420889793e-24
ENSG00000138496	83666	PARP9	poly(ADP-ribose) polymerase family member 9	494.686266637472	-0.93144072125021	5.39998405908635e-24
ENSG00000115884	6382	SDC1	syndecan 1	2082.08879228223	-0.465662289263687	5.48584206013571e-24
ENSG00000051108	9709	HERPUD1	homocysteine inducible ER protein with ubiquitin like domain 1	1341.14709788197	0.654468071120118	5.50034912048159e-24
ENSG00000145476	285440	CYP4V2	cytochrome P450 family 4 subfamily V member 2	387.755022001213	1.07374488902299	6.27046156362531e-24
ENSG00000261801	100287616	LOXL1-AS1	LOXL1 antisense RNA 1	105.169076794401	-2.05727619199738	6.54294902256609e-24
ENSG00000105855	3696	ITGB8	integrin subunit beta 8	3040.6139949659	-0.419942992928062	7.3672574736393e-24
ENSG00000187514	5757	PTMA	prothymosin alpha	7089.95435193325	-0.31555471762097	7.38806312289721e-24
ENSG00000145901	10318	TNIP1	TNFAIP3 interacting protein 1	1730.62830535274	-0.500437969437587	8.33238984230211e-24
ENSG00000157193	7804	LRP8	LDL receptor related protein 8	2611.73786806179	0.438016982879111	8.53675192084312e-24
ENSG00000065526	23013	SPEN	spen family transcriptional repressor	1831.70074339114	0.517101904777741	8.80186907634032e-24
ENSG00000264364	140735	DYNLL2	dynein light chain LC8-type 2	4659.78197335075	-0.380181382887307	9.02664613621604e-24
ENSG00000198408	10724	MGEA5	meningioma expressed antigen 5 (hyaluronidase)	3739.26960555665	0.393079841970365	9.76118876191118e-24
ENSG00000102935	23090	ZNF423	zinc finger protein 423	171.311202671464	-1.62948252717002	1.10695363079022e-23
ENSG00000132382	10514	MYBBP1A	MYB binding protein 1a	1979.49814285344	0.48028870452267	1.10814908773173e-23
ENSG00000140105	7453	WARS	tryptophanyl-tRNA synthetase	1199.70405594479	0.633713981867375	1.11231294878121e-23
ENSG00000130707	445	ASS1	argininosuccinate synthase 1	123.43880256981	2.06516324757535	1.23899634341828e-23
ENSG00000013810	10460	TACC3	transforming acidic coiled-coil containing protein 3	3721.13786499666	0.361520914863073	1.27387978383938e-23
ENSG00000198901	9055	PRC1	protein regulator of cytokinesis 1	3723.61176989822	-0.406665742584071	1.53440562749401e-23
ENSG00000153944	124540	MSI2	musashi RNA binding protein 2	4163.63036662785	-0.356735169979941	1.7792996214395e-23
ENSG00000175832	2118	ETV4	ETS variant 4	216.252212041373	1.44057937064272	1.78238964986689e-23
ENSG00000105894	5764	PTN	pleiotrophin	1983.17394535533	-0.471465698026321	1.79483117494093e-23
ENSG00000153250	5937	RBMS1	RNA binding motif single stranded interacting protein 1	1113.99308745782	-0.600624132910576	2.05633850137895e-23
ENSG00000178252	11180	WDR6	WD repeat domain 6	3246.02299842166	0.378531569282398	2.05633850137895e-23
ENSG00000105771	56006	SMG9	SMG9, nonsense mediated mRNA decay factor	1250.15549313422	0.586887557630373	2.11495406940239e-23
ENSG00000227082	107985194	LINC02798	Long Intergenic Non-Protein Coding RNA 2798	130.042885978894	-1.80274284297204	2.21194491982126e-23
ENSG00000126461	58506	SCAF1	SR-related CTD associated factor 1	2879.0231410206	0.433312108549676	2.3186003107228e-23
ENSG00000152689	25780	RASGRP3	RAS guanyl releasing protein 3	110.147508065907	-2.08864752593654	2.45222656834895e-23
ENSG00000244879	100129387	GABPB1-AS1	GABPB1 Antisense RNA 1	478.843269211609	0.950095570694527	2.4906074589526e-23
ENSG00000161996	197335	WDR90	WD repeat domain 90	418.046072778345	1.07369282335644	2.77773361403036e-23
ENSG00000108179	10105	PPIF	peptidylprolyl isomerase F	1868.39445900096	0.480430942004653	2.98365918615093e-23
ENSG00000128791	57045	TWSG1	twisted gastrulation BMP signaling modulator 1	2624.57720896535	-0.428118726218076	3.2071461848116e-23
ENSG00000163946	23272	FAM208A	family with sequence similarity 208 member A	1888.90607304511	-0.480195005262285	3.2071461848116e-23
ENSG00000140400	4123	MAN2C1	mannosidase alpha class 2C member 1	686.723647495736	0.799198722307949	3.36319769062453e-23
ENSG00000148358	57720	GPR107	G protein-coupled receptor 107	1991.28542009003	0.469932575232543	3.65618178685384e-23
ENSG00000177169	8408	ULK1	unc-51 like autophagy activating kinase 1	1034.30371513337	0.633616920122421	4.62400355801531e-23
ENSG00000101844	115201	ATG4A	autophagy related 4A cysteine peptidase	576.128245445025	-0.83054617056838	4.81857420720865e-23
ENSG00000113643	5917	RARS	arginyl-tRNA synthetase	2222.40654872549	-0.453933602014793	4.86399789646587e-23
ENSG00000079785	1653	DDX1	DEAD-box helicase 1	2261.59856730654	-0.442965375962103	5.32740918671972e-23
ENSG00000115825	23683	PRKD3	protein kinase D3	989.342199549136	-0.66099104828109	5.35041748584138e-23
ENSG00000162434	3716	JAK1	Janus kinase 1	2739.27148946145	-0.409621553185691	5.45061726542253e-23
ENSG00000112715	7422	VEGFA	vascular endothelial growth factor A	3138.17154323016	1.00702822515788	6.12914429566758e-23
ENSG00000243147	9553	MRPL33	mitochondrial ribosomal protein L33	1056.34398988942	-0.657388001591592	7.43642142259541e-23
ENSG00000168268	64943	NT5DC2	5'-nucleotidase domain containing 2	4342.1560047756	-0.324100131633823	8.20931493024666e-23
ENSG00000125148	4502	MT2A	metallothionein 2A	3382.4992545107	-0.368156737977219	8.40641351076621e-23
ENSG00000104341	55353	LAPTM4B	lysosomal protein transmembrane 4 beta	2756.48285877222	-0.404784792695318	8.54069392196567e-23
ENSG00000204394	7407	VARS	valyl-tRNA synthetase	4068.86315028192	0.371514972495074	8.60905901870448e-23
ENSG00000075275	9620	CELSR1	cadherin EGF LAG seven-pass G-type receptor 1	312.452578867985	1.17974670692794	8.68344598359262e-23
ENSG00000226608	284764	FTLP3	Ferritin Light Chain Pseudogene 3	130.866257293435	1.8825923719381	1.13524664347139e-22
ENSG00000110958	10728	PTGES3	prostaglandin E synthase 3	6337.80765199653	-0.308758122116232	1.1573605942049e-22
ENSG00000179632	84232	MAF1	MAF1 homolog, negative regulator of RNA polymerase III	1263.72688849052	0.596139936547424	1.17499302581611e-22
ENSG00000101104	80336	PABPC1L	poly(A) binding protein cytoplasmic 1 like	286.786783409659	1.22324602686226	1.191654013266e-22
ENSG00000109472	1363	CPE	carboxypeptidase E	769.962649676584	-0.750093017747041	1.1925940669984e-22
ENSG00000149177	5795	PTPRJ	protein tyrosine phosphatase, receptor type J	2516.76854863042	-0.42677978987408	1.19672139279258e-22
ENSG00000152518	678	ZFP36L2	ZFP36 ring finger protein like 2	1025.87718591406	-0.641045949750889	1.37117251168058e-22
ENSG00000156113	3778	KCNMA1	potassium calcium-activated channel subfamily M alpha 1	452.516919926358	-0.95929647920399	1.50994918512589e-22
ENSG00000153317	50807	ASAP1	ArfGAP with SH3 domain, ankyrin repeat and PH domain 1	1635.16817244276	0.501668213793472	1.58769788711358e-22
ENSG00000104859	11129	CLASRP	CLK4 associating serine/arginine rich protein	790.598270392809	0.70478035381207	1.61813322525758e-22
ENSG00000128487	92521	SPECC1	sperm antigen with calponin homology and coiled-coil domains 1	2304.65826448859	-0.485231083752601	1.66944120028317e-22
ENSG00000198563	7919	DDX39B	DExD-box helicase 39B	1317.42080473094	1.30499558376241	1.8437685190734e-22
ENSG00000047315	5431	POLR2B	RNA polymerase II subunit B	6148.57507702684	-0.310287141767429	2.00567886556692e-22
ENSG00000123143	5585	PKN1	protein kinase N1	2983.53019786085	0.407823121783002	2.11605833699355e-22
ENSG00000142089	10410	IFITM3	interferon induced transmembrane protein 3	503.456576523652	-0.864422898368225	2.22286411482224e-22
ENSG00000130254	9667	SAFB2	scaffold attachment factor B2	1232.14876097535	0.563303913040358	2.38944739578211e-22
ENSG00000048052	9734	HDAC9	histone deacetylase 9	1880.82172438447	-0.488427026340958	2.53761470830726e-22
ENSG00000196422	9858	PPP1R26	protein phosphatase 1 regulatory subunit 26	591.993722184699	0.833736167740566	2.53761470830726e-22
ENSG00000170873	9788	MTSS1	MTSS1, I-BAR domain containing	155.838655945063	-1.5781972755052	2.62423781568802e-22
ENSG00000173786	1267	CNP	2',3'-cyclic nucleotide 3' phosphodiesterase	3705.80855140795	-0.397103846913063	2.68935209532622e-22
ENSG00000221983	7311	UBA52	ubiquitin A-52 residue ribosomal protein fusion product 1	5642.6501536162	-0.339636363323699	3.23272986464364e-22
ENSG00000068366	2182	ACSL4	acyl-CoA synthetase long chain family member 4	2803.87693355725	-0.420975519325194	3.2558184356952e-22
ENSG00000270231	728841	NBPF8	NBPF member 8	480.766521634828	0.92549040003171	3.30991687547248e-22
ENSG00000132341	5901	RAN	RAN, member RAS oncogene family	5383.82010365966	-0.303306459924246	3.51130365639381e-22
ENSG00000104067	7082	TJP1	tight junction protein 1	1745.08618564082	-0.4968494426066	3.60332247263603e-22
ENSG00000154978	81552	VOPP1	VOPP1, WBP1/VOPP1 family member	971.668761949402	-0.620019240092046	3.6390384153882e-22
ENSG00000141510	7157	TP53	tumor protein p53	2286.12483455117	-0.431636846599501	3.67797058825083e-22
ENSG00000142599	473	RERE	arginine-glutamic acid dipeptide repeats	2164.03397587289	0.463721857169824	3.67797058825083e-22
ENSG00000078401	1906	EDN1	endothelin 1	59.5050174908782	-3.06318198928667	3.74509378676537e-22
ENSG00000234771	100289019	SLC25A25-AS1	SLC25A25 Antisense RNA 1	81.3125881694616	2.66695807823409	4.08015831289579e-22
ENSG00000119878	9419	CRIPT	CXXC repeat containing interactor of PDZ3 domain	398.991686068227	-0.960610997779825	4.23719324561463e-22
ENSG00000159314	201176	ARHGAP27	Rho GTPase activating protein 27	128.635392991331	1.86230309232084	4.60942748455025e-22
ENSG00000137337	9656	MDC1	mediator of DNA damage checkpoint 1	1251.35439148535	0.580893089409158	5.65248433871533e-22
ENSG00000184613	4753	NELL2	neural EGFL like 2	74.126324344582	5.73139014253703	5.74329585501453e-22
ENSG00000129474	84962	AJUBA	ajuba LIM protein	570.852692150438	-0.852223622537683	5.8335893441222e-22
ENSG00000186866	23275	POFUT2	protein O-fucosyltransferase 2	792.70594684235	0.710162963031792	5.90697995689168e-22
ENSG00000100393	2033	EP300	E1A binding protein p300	1667.59361068991	0.520992631623607	6.2872554648088e-22
ENSG00000157404	3815	KIT	KIT proto-oncogene receptor tyrosine kinase	106.809326545831	-2.12384760573303	7.38250851028922e-22
ENSG00000214078	8904	CPNE1	copine 1	2135.31798013416	-0.461660150013021	7.93950071735953e-22
ENSG00000073150	56666	PANX2	pannexin 2	318.771166208186	1.10913543090841	8.00233644504008e-22
ENSG00000188554	4077	NBR1	NBR1, autophagy cargo receptor	2448.91551231889	-0.406737730655867	8.1683825914277e-22
ENSG00000107104	23189	KANK1	KN motif and ankyrin repeat domains 1	1458.15658654043	0.533326713386115	8.88406012856675e-22
ENSG00000136848	153090	DAB2IP	DAB2 interacting protein	901.04968430008	0.663004584851511	9.18175537774904e-22
ENSG00000169116	25849	PARM1	prostate androgen-regulated mucin-like protein 1	72.768819940909	2.80111819223779	9.3889584077424e-22
ENSG00000108691	6347	CCL2	C-C motif chemokine ligand 2	51.123485920903	-3.56008545459668	9.75717108659767e-22
ENSG00000242498	348110	ARPIN	actin related protein 2/3 complex inhibitor	613.002120255921	-0.846217804764389	9.75717108659767e-22
ENSG00000084073	10269	ZMPSTE24	zinc metallopeptidase STE24	2571.53404138109	-0.410799082488123	9.99110194112376e-22
ENSG00000116473	5906	RAP1A	RAP1A, member of RAS oncogene family	1329.29123865384	-0.612770039670378	1.05102149755567e-21
ENSG00000163565	3428	IFI16	interferon gamma inducible protein 16	2211.23341430455	-0.456624836225272	1.15748729142422e-21
ENSG00000116288	11315	PARK7	Parkinsonism associated deglycase	4423.35216865086	-0.321764761553679	1.17945952046024e-21
ENSG00000127948	5447	POR	cytochrome p450 oxidoreductase	1521.43181372041	0.516675013890969	1.21592527158266e-21
ENSG00000150403	55002	TMCO3	transmembrane and coiled-coil domains 3	1632.18436272758	-0.481194297434594	1.22955784927566e-21
ENSG00000011028	9902	MRC2	mannose receptor C type 2	4834.43698469434	-0.357769760012125	1.25599256134274e-21
ENSG00000003436	7035	TFPI	tissue factor pathway inhibitor	326.673557163623	-1.052159004036	1.30938170623569e-21
ENSG00000160796	23218	NBEAL2	neurobeachin like 2	807.575173566829	0.778718081239022	1.35193372264775e-21
ENSG00000153130	60592	SCOC	short coiled-coil protein	1941.0317269583	-0.456030919700313	1.36490407260773e-21
ENSG00000105971	858	CAV2	caveolin 2	1356.01778624031	-0.538622494680032	1.36615354373833e-21
ENSG00000157916	11079	RER1	retention in endoplasmic reticulum sorting receptor 1	2105.35363451813	-0.431904521725713	1.3738571635444e-21
ENSG00000084731	3797	KIF3C	kinesin family member 3C	871.560754542649	-0.664548852061724	1.44957437933071e-21
ENSG00000122870	80114	BICC1	BicC family RNA binding protein 1	653.584061196592	-0.738031288565136	1.47874901652391e-21
ENSG00000158805	92822	ZNF276	zinc finger protein 276	221.812182368606	1.34077319675327	1.52691441649831e-21
ENSG00000198561	1500	CTNND1	catenin delta 1	3107.02024729527	-0.402043051870483	1.59138759666684e-21
ENSG00000115350	56655	POLE4	DNA polymerase epsilon 4, accessory subunit	330.302456651653	-1.0539350051271	1.59814899494791e-21
ENSG00000121068	6909	TBX2	T-box 2	306.071871888564	1.43411291028653	1.6337114601971e-21
ENSG00000108465	80279	CDK5RAP3	CDK5 regulatory subunit associated protein 3	248.644009072321	1.39769676173401	1.63745831462635e-21
ENSG00000174705	285590	SH3PXD2B	SH3 and PX domains 2B	2870.08840605802	0.39475987612176	1.73415821367475e-21
ENSG00000162601	114803	MYSM1	Myb like, SWIRM and MPN domains 1	906.750280871142	0.667279563909533	1.77469958770909e-21
ENSG00000100813	22985	ACIN1	apoptotic chromatin condensation inducer 1	2472.76376769655	0.441880372461008	1.88715412039539e-21
ENSG00000107518	26033	ATRNL1	attractin like 1	67.2748814423486	2.9671535150231	1.88806564223415e-21
ENSG00000086061	3301	DNAJA1	DnaJ heat shock protein family (Hsp40) member A1	3952.30432036014	-0.355614200200039	2.02589126008668e-21
ENSG00000102554	688	KLF5	Kruppel like factor 5	537.839886455933	-0.84487132930937	2.50364451473467e-21
ENSG00000099204	3983	ABLIM1	actin binding LIM protein 1	640.860450982132	-0.755317904722701	2.59242787651861e-21
ENSG00000103044	3038	HAS3	hyaluronan synthase 3	249.267156922839	1.35716210050974	2.63840414273128e-21
ENSG00000274211	30837	SOCS7	suppressor of cytokine signaling 7	987.924113635832	0.612977409591866	2.78081770556373e-21
ENSG00000167283	10632	ATP5MG	ATP synthase membrane subunit g	2553.62357697313	-0.458440927289802	2.88100044702265e-21
ENSG00000154175	25890	ABI3BP	ABI family member 3 binding protein	179.318521986462	-1.43521047588711	3.23561923476473e-21
ENSG00000115159	2820	GPD2	glycerol-3-phosphate dehydrogenase 2	2208.04176359738	-0.48158914887392	3.32428170809411e-21
ENSG00000118596	9194	SLC16A7	solute carrier family 16 member 7	107.705401329664	2.03112532174801	3.32723254764394e-21
ENSG00000025800	23633	KPNA6	karyopherin subunit alpha 6	2073.44121289821	-0.482926294604605	3.48058699698565e-21
ENSG00000164930	8323	FZD6	frizzled class receptor 6	1733.43039512766	0.490822428868496	3.48663985129619e-21
ENSG00000129625	7905	REEP5	receptor accessory protein 5	2480.09962000044	-0.412967941015628	3.50893864502004e-21
ENSG00000076053	10179	RBM7	RNA binding motif protein 7	740.991958568466	-0.712979654470317	3.51023172137839e-21
ENSG00000141503	50488	MINK1	misshapen like kinase 1	1710.83444752547	0.472514062937451	3.61424723092183e-21
ENSG00000108946	5573	PRKAR1A	protein kinase cAMP-dependent type I regulatory subunit alpha	3628.2262517102	-0.33724514537152	3.62597402967664e-21
ENSG00000156860	64319	FBRS	fibrosin	1344.95378476451	0.522240847425164	3.75172341680153e-21
ENSG00000153113	831	CAST	calpastatin	7256.23578131938	-0.295534269182077	3.93856950016039e-21
ENSG00000107331	20	ABCA2	ATP binding cassette subfamily A member 2	808.8826224373	0.68471100504374	4.1059564218753e-21
ENSG00000165802	26012	NSMF	NMDA receptor synaptonuclear signaling and neuronal migration factor	1334.68649660001	0.567169548793747	4.49420514747231e-21
ENSG00000180776	253832	ZDHHC20	zinc finger DHHC-type containing 20	1785.61803442536	-0.463732671738202	4.62677692526811e-21
ENSG00000171365	1184	CLCN5	chloride voltage-gated channel 5	447.965211331816	0.925411818292367	4.79633877354086e-21
ENSG00000149541	26229	B3GAT3	beta-1,3-glucuronyltransferase 3	782.649359565391	0.683974682719822	5.21162372135831e-21
ENSG00000179950	22827	PUF60	poly(U) binding splicing factor 60	2563.72446225155	0.393692954752163	5.28175786873162e-21
ENSG00000152700	51128	SAR1B	secretion associated Ras related GTPase 1B	1322.19302981035	-0.532796648186101	5.41349707448342e-21
ENSG00000115241	5496	PPM1G	protein phosphatase, Mg2+/Mn2+ dependent 1G	3074.62449702087	-0.383081955332959	5.54506170243268e-21
ENSG00000169372	8738	CRADD	CASP2 and RIPK1 domain containing adaptor with death domain	282.53001582432	-1.13464145914316	5.65810408753101e-21
ENSG00000176014	84617	TUBB6	tubulin beta 6 class V	2258.79152683941	-0.414985105128584	6.18499883345665e-21
ENSG00000185262	283991	UBALD2	UBA like domain containing 2	1220.83134987793	0.554636469075451	6.23202598946284e-21
ENSG00000116005	51449	PCYOX1	prenylcysteine oxidase 1	2116.13455343366	-0.454981133834822	6.54760938448997e-21
ENSG00000173621	78999	LRFN4	leucine rich repeat and fibronectin type III domain containing 4	497.790196379574	0.854195947289447	6.62240020751055e-21
ENSG00000180879	6748	SSR4	signal sequence receptor subunit 4	2369.84680179087	-0.40960918844182	6.64228150545761e-21
ENSG00000225138	100288152	SLC9A3-AS1	SLC9A3 Antisense RNA 1	361.36157164171	1.05453859954907	6.74781965325014e-21
ENSG00000131149	23199	GSE1	Gse1 coiled-coil protein	2165.73062204541	0.451987240549003	7.05588110785892e-21
ENSG00000164211	134429	STARD4	StAR related lipid transfer domain containing 4	526.708312209254	-0.838319085970109	7.22872732725793e-21
ENSG00000230989	3281	HSBP1	heat shock factor binding protein 1	2907.29380052281	-0.383592411810379	7.23284177069804e-21
ENSG00000177463	7182	NR2C2	nuclear receptor subfamily 2 group C member 2	1943.89737470475	0.483424681617175	7.82993094041622e-21
ENSG00000075711	1739	DLG1	discs large MAGUK scaffold protein 1	3233.5269407608	-0.384307024240579	7.84320573494022e-21
ENSG00000103145	54985	HCFC1R1	host cell factor C1 regulator 1	382.48682633874	-1.04754093041365	7.84320573494022e-21
ENSG00000122566	3181	HNRNPA2B1	heterogeneous nuclear ribonucleoprotein A2/B1	23426.7616581374	0.207453042741521	8.21929995402023e-21
ENSG00000144959	57552	NCEH1	neutral cholesterol ester hydrolase 1	811.41661206142	-0.678538353905551	1.0153451106651e-20
ENSG00000094916	23468	CBX5	chromobox 5	3310.20045999743	-0.351363757739765	1.15577977748162e-20
ENSG00000101199	55738	ARFGAP1	ADP ribosylation factor GTPase activating protein 1	1677.9529333012	0.555881815748108	1.37783812374709e-20
ENSG00000155660	9601	PDIA4	protein disulfide isomerase family A member 4	8278.76846496367	-0.331465293709626	1.40958414927667e-20
ENSG00000136830	64855	FAM129B	family with sequence similarity 129 member B	5955.97348824567	0.299401195051192	1.53546376995385e-20
ENSG00000137760	91801	ALKBH8	alkB homolog 8, tRNA methyltransferase	649.262007199256	-0.741251748797273	1.5584922245884e-20
ENSG00000078053	273	AMPH	amphiphysin	60.7288907454638	3.45546553169255	1.682310837772e-20
ENSG00000100632	2079	ERH	ERH, mRNA splicing and mitosis factor	2216.7823516741	-0.435167440758257	1.94528490741012e-20
ENSG00000090372	29888	STRN4	striatin 4	3764.66125517243	0.34126352573573	1.95376356995598e-20
ENSG00000148339	114789	SLC25A25	solute carrier family 25 member 25	489.174064896123	0.872524444599957	1.9975294760816e-20
ENSG00000116001	7072	TIA1	TIA1 cytotoxic granule associated RNA binding protein	1629.3979783155	-0.483698877526571	2.0030840191918e-20
ENSG00000134884	55082	ARGLU1	arginine and glutamate rich 1	1160.13250196401	0.557938507049654	2.16594930698671e-20
ENSG00000188130	6300	MAPK12	mitogen-activated protein kinase 12	432.47635532092	0.949605250971012	2.20900036393861e-20
ENSG00000148297	6837	MED22	mediator complex subunit 22	721.203695701679	0.731635082401168	2.27835803248363e-20
ENSG00000182979	9112	MTA1	metastasis associated 1	1067.13081400973	0.596612155260833	2.27835803248363e-20
ENSG00000141456	27043	PELP1	proline, glutamate and leucine rich protein 1	1303.84023523878	0.520098149068096	2.56697969550528e-20
ENSG00000243244	11037	STON1	stonin 1	306.350670609454	-1.15277936118972	2.8982675906151e-20
ENSG00000173821	57674	RNF213	ring finger protein 213	2816.74727712191	0.494676486827003	2.91824051226353e-20
ENSG00000130511	170463	SSBP4	single stranded DNA binding protein 4	776.779129906752	0.673184232680461	3.26069576510587e-20
ENSG00000076201	25930	PTPN23	protein tyrosine phosphatase, non-receptor type 23	1466.7263267978	0.52180833952416	3.30915830597758e-20
ENSG00000125505	79143	MBOAT7	membrane bound O-acyltransferase domain containing 7	3303.47595440644	-0.35858871654268	3.9026460135255e-20
ENSG00000166963	4130	MAP1A	microtubule associated protein 1A	259.039938263696	1.30133354671205	4.07657124345025e-20
ENSG00000164548	29896	TRA2A	transformer 2 alpha homolog	1171.10497793535	-0.55532869465229	4.13176325228496e-20
ENSG00000131018	23345	SYNE1	spectrin repeat containing nuclear envelope protein 1	1260.97089247993	0.553464088422998	4.29780138377976e-20
ENSG00000147799	80728	ARHGAP39	Rho GTPase activating protein 39	297.147805448247	1.13997689600785	4.46667438801031e-20
ENSG00000099326	7593	MZF1	myeloid zinc finger 1	254.589319295799	1.21127392610178	4.5743674273053e-20
ENSG00000134970	51014	TMED7	transmembrane p24 trafficking protein 7	2490.92204590154	-0.438174696616363	4.57772684433521e-20
ENSG00000105135	10994	ILVBL	ilvB acetolactate synthase like	1267.45735879414	0.548139594841491	5.44378440519432e-20
ENSG00000150459	10284	SAP18	Sin3A associated protein 18	1463.67220618988	-0.521066766630321	5.7704063814071e-20
ENSG00000147650	29967	LRP12	LDL receptor related protein 12	1336.26138900973	0.560247348265154	5.83886797410681e-20
ENSG00000142676	6135	RPL11	ribosomal protein L11	8764.16291802749	-0.254769481893698	6.13839534669908e-20
ENSG00000188566	27158	NDOR1	NADPH dependent diflavin oxidoreductase 1	386.524193518126	0.977597514949544	6.74268933848942e-20
ENSG00000160360	26086	GPSM1	G protein signaling modulator 1	477.429330811215	0.866761571661905	6.81789311160169e-20
ENSG00000157954	26100	WIPI2	WD repeat domain, phosphoinositide interacting 2	1802.21695108648	-0.448772914637525	7.77368568463967e-20
ENSG00000185803	79581	SLC52A2	solute carrier family 52 member 2	951.040237453523	0.62110492714102	8.08724891596472e-20
ENSG00000085224	546	ATRX	ATRX, chromatin remodeler	2889.29040583073	-0.389011204847293	9.19124306666059e-20
ENSG00000181722	26137	ZBTB20	zinc finger and BTB domain containing 20	573.156006353448	-0.803994621718365	9.81237732404155e-20
ENSG00000134318	9475	ROCK2	Rho associated coiled-coil containing protein kinase 2	1644.94411742379	-0.566679735907772	1.01459113977933e-19
ENSG00000169398	5747	PTK2	protein tyrosine kinase 2	1518.29449336298	0.486834529133312	1.05031159440265e-19
ENSG00000113558	6500	SKP1	S-phase kinase associated protein 1	3678.02234227529	-0.342263272855797	1.09689284523715e-19
ENSG00000125755	8189	SYMPK	symplekin	2470.14079897985	0.441636565553816	1.09935755928505e-19
ENSG00000107960	79991	STN1	STN1, CST complex subunit	668.814575373521	-0.700515110630706	1.14331093665194e-19
ENSG00000136451	7716	VEZF1	vascular endothelial zinc finger 1	2300.08180912907	-0.410645916713343	1.25357790662597e-19
ENSG00000244242	402778	IFITM10	interferon induced transmembrane protein 10	124.122209285298	1.79839779808674	1.40911984900091e-19
ENSG00000153551	112616	CMTM7	CKLF like MARVEL transmembrane domain containing 7	170.076327867043	1.54741506442474	1.48823809032102e-19
ENSG00000156475	5521	PPP2R2B	protein phosphatase 2 regulatory subunit Bbeta	195.297543439024	-1.35011165801959	1.55734228674663e-19
ENSG00000183648	4707	NDUFB1	NADH:ubiquinone oxidoreductase subunit B1	373.117609705844	-0.947075044708509	1.57791147460889e-19
ENSG00000117450	5052	PRDX1	peroxiredoxin 1	7806.60796840456	-0.252767775936534	1.74612541307379e-19
ENSG00000109046	26118	WSB1	WD repeat and SOCS box containing 1	1528.65354419928	0.520823730930245	1.79639831987717e-19
ENSG00000102312	64840	PORCN	porcupine O-acyltransferase	551.270000900875	-0.781382894471169	1.80456193613826e-19
ENSG00000228232	2616	GAPDHP1	Glyceraldehyde-3-Phosphate Dehydrogenase Pseudogene 1	94.2481988836418	2.11801938666373	1.89089696948235e-19
ENSG00000160211	2539	G6PD	glucose-6-phosphate dehydrogenase	5286.27386832537	-0.316448994871884	2.10414958247995e-19
ENSG00000231826	102723854	LINC01819	long intergenic non-protein coding RNA 1819	42.1402771974879	-3.83001656970702	2.25287747527265e-19
ENSG00000068912	27248	ERLEC1	endoplasmic reticulum lectin 1	1178.78428045606	-0.527924566453482	2.49459648854685e-19
ENSG00000112276	11149	BVES	blood vessel epicardial substance	3741.87029636164	-0.355315889331835	2.51461015832399e-19
ENSG00000143153	481	ATP1B1	ATPase Na+/K+ transporting subunit beta 1	3143.57641261846	0.393184962019262	2.61863889774346e-19
ENSG00000079432	23152	CIC	capicua transcriptional repressor	3493.09326260373	0.343690387873881	2.64372915870376e-19
ENSG00000251003	102723356	ZFPM2-AS1	ZFPM2 Antisense RNA 1	191.521435369023	1.43736182646744	2.89239660896834e-19
ENSG00000124145	6385	SDC4	syndecan 4	813.890806946874	-0.640346443561486	2.92690844596267e-19
ENSG00000143742	6726	SRP9	signal recognition particle 9	2756.51201294739	-0.395223078450496	2.94856916656469e-19
ENSG00000079246	7520	XRCC5	X-ray repair cross complementing 5	6831.10461313361	-0.261575359528627	2.95197040982299e-19
ENSG00000113575	5515	PPP2CA	protein phosphatase 2 catalytic subunit alpha	3656.11039895685	-0.361599157225324	2.96202530471112e-19
ENSG00000071282	29995	LMCD1	LIM and cysteine rich domains 1	783.960391629131	-0.633894996034524	3.01528627331145e-19
ENSG00000050438	9498	SLC4A8	solute carrier family 4 member 8	641.478448720987	-0.775783894808816	3.42164364426551e-19
ENSG00000269858	112398	EGLN2	egl-9 family hypoxia inducible factor 2	257.753340053846	1.18339488244985	3.5966259861757e-19
ENSG00000170006	201799	TMEM154	transmembrane protein 154	404.013859690543	-0.940722518624832	3.79005209350097e-19
ENSG00000104967	4858	NOVA2	NOVA alternative splicing regulator 2	767.010303215042	-0.660236988060381	3.8537235775268e-19
ENSG00000164056	10252	SPRY1	sprouty RTK signaling antagonist 1	218.630401540836	1.25079394776477	4.15908305032641e-19
ENSG00000139174	144165	PRICKLE1	prickle planar cell polarity protein 1	710.504021981397	-0.683394094885313	4.20421545262922e-19
ENSG00000116062	2956	MSH6	mutS homolog 6	1863.82954825433	-0.442359000678542	4.24447504846008e-19
ENSG00000114268	5210	PFKFB4	6-phosphofructo-2-kinase/fructose-2,6-biphosphatase 4	1092.16568112868	-0.567569806754912	4.28927015423592e-19
ENSG00000138759	80144	FRAS1	Fraser extracellular matrix complex subunit 1	440.30809897956	0.903878236318986	4.30072485295545e-19
ENSG00000086758	10075	HUWE1	HECT, UBA and WWE domain containing 1, E3 ubiquitin protein ligase	9335.61262156584	0.324444059109647	4.49709843084693e-19
ENSG00000089154	10985	GCN1	GCN1, eIF2 alpha kinase activator homolog	2504.65779031131	0.387528097867138	4.59887128211679e-19
ENSG00000122692	55234	SMU1	SMU1, DNA replication regulator and spliceosomal factor	1496.04011663628	-0.471932542382244	4.60402547538151e-19
ENSG00000137692	84259	DCUN1D5	defective in cullin neddylation 1 domain containing 5	510.632400071214	-0.813260296723707	4.61161368848281e-19
ENSG00000186815	53373	TPCN1	two pore segment channel 1	683.257251226674	0.687975582466141	5.01071929187574e-19
ENSG00000108175	57178	ZMIZ1	zinc finger MIZ-type containing 1	2409.88457944415	0.393931198780176	5.20180285057817e-19
ENSG00000141867	23476	BRD4	bromodomain containing 4	2082.65425314127	0.407141486775062	5.36167021018166e-19
ENSG00000197989	85028	SNHG12	small nucleolar RNA host gene 12	190.541269706716	1.47709499480689	5.46500561818553e-19
ENSG00000131242	84440	RAB11FIP4	RAB11 family interacting protein 4	839.424576560681	0.621042305133631	5.49592682569653e-19
ENSG00000005007	5976	UPF1	UPF1, RNA helicase and ATPase	2536.2167513989	0.397166446247195	5.68187179080686e-19
ENSG00000136295	80727	TTYH3	tweety family member 3	9436.72120916841	-0.280323602697416	5.76152857247359e-19
ENSG00000113552	10007	GNPDA1	glucosamine-6-phosphate deaminase 1	1017.92840178628	0.576512162720899	5.81002065499807e-19
ENSG00000113732	8992	ATP6V0E1	ATPase H+ transporting V0 subunit e1	2791.1484103993	-0.362004378498859	5.91806103866489e-19
ENSG00000123136	10212	DDX39A	DExD-box helicase 39A	1970.19146669002	0.426389187915276	6.07360624068513e-19
ENSG00000106211	3315	HSPB1	heat shock protein family B (small) member 1	3489.55254456875	-0.354795392579193	6.7504793538944e-19
ENSG00000178573	4094	MAF	MAF bZIP transcription factor	1147.0551143648	0.592300516026563	6.9815777643693e-19
ENSG00000128394	200316	APOBEC3F	apolipoprotein B mRNA editing enzyme catalytic subunit 3F	105.990516918911	-1.83092475935982	8.99480119394932e-19
ENSG00000136869	7099	TLR4	toll like receptor 4	771.406261038188	0.705895873997409	9.09156439529521e-19
ENSG00000121486	81627	TRMT1L	tRNA methyltransferase 1 like	626.930827722124	-0.708730768805454	9.15846877247051e-19
ENSG00000111670	79158	GNPTAB	N-acetylglucosamine-1-phosphate transferase alpha and beta subunits	1109.17250025653	-0.558076601736306	1.1701767887191e-18
ENSG00000183955	387893	KMT5A	lysine methyltransferase 5A	674.099243380663	0.696782439206213	1.27509111634251e-18
ENSG00000154127	84959	UBASH3B	ubiquitin associated and SH3 domain containing B	793.811615433965	0.689056997013341	1.37086149820203e-18
ENSG00000134278	56907	SPIRE1	spire type actin nucleation factor 1	772.094520807181	0.665134771877776	1.48586664471443e-18
ENSG00000187837	3006	HIST1H1C	histone cluster 1 H1 family member c	164.842993212407	-1.44794163274818	1.5471941753962e-18
ENSG00000119318	5887	RAD23B	RAD23 homolog B, nucleotide excision repair protein	4150.98042539952	0.31594769273642	1.55849690229795e-18
ENSG00000164099	8492	PRSS12	serine protease 12	495.688001157075	0.814597279016576	1.5705536191249e-18
ENSG00000100941	5411	PNN	pinin, desmosome associated protein	1881.70786760945	0.463668888987138	1.70407125371593e-18
ENSG00000133275	1455	CSNK1G2	casein kinase 1 gamma 2	1916.19449544919	0.430355155727468	1.74859582199046e-18
ENSG00000139433	51228	GLTP	glycolipid transfer protein	740.677144878823	-0.668163102467299	1.77969852097941e-18
ENSG00000115226	64838	FNDC4	fibronectin type III domain containing 4	315.921629005616	-1.0327251897261	2.0364784827701e-18
ENSG00000116704	23169	SLC35D1	solute carrier family 35 member D1	731.07345499346	-0.647725646047181	2.0364784827701e-18
ENSG00000198523	5350	PLN	phospholamban	40.3399930872154	-3.75674055055895	2.06930814367755e-18
ENSG00000119408	10783	NEK6	NIMA related kinase 6	1747.65855592805	0.451561374532786	2.12499802219628e-18
ENSG00000245532	283131	NEAT1	nuclear paraspeckle assembly transcript 1 (non-protein coding)	8602.25831112717	1.69663140801768	2.12499802219628e-18
ENSG00000236552	728658	RPL13AP5	ribosomal protein L13a pseudogene 5	95.5210411486311	2.09657704552117	2.21347757241683e-18
ENSG00000149930	9344	TAOK2	TAO kinase 2	1120.95497107866	0.53174135549396	2.44670668244994e-18
ENSG00000139946	57161	PELI2	pellino E3 ubiquitin protein ligase family member 2	501.090247756659	-0.788498785850938	2.49423102188897e-18
ENSG00000100836	8106	PABPN1	poly(A) binding protein nuclear 1	1007.37806423373	0.58759014811058	2.49475227902281e-18
ENSG00000266412	8031	NCOA4	nuclear receptor coactivator 4	2794.39320796523	-0.360346632964451	2.64645486325273e-18
ENSG00000058262	29927	SEC61A1	Sec61 translocon alpha 1 subunit	8106.94003479995	0.261568752489287	2.77267234954564e-18
ENSG00000130559	157922	CAMSAP1	calmodulin regulated spectrin associated protein 1	1101.65996355452	0.539470479845281	2.80949195801212e-18
ENSG00000132507	1984	EIF5A	eukaryotic translation initiation factor 5A	6711.38231273094	-0.252973857490809	2.80949195801212e-18
ENSG00000162496	9249	DHRS3	dehydrogenase/reductase 3	304.871706906182	-2.58600752813894	2.91733693253985e-18
ENSG00000198952	23381	SMG5	SMG5, nonsense mediated mRNA decay factor	2839.29571931576	0.352632899184164	2.91733693253985e-18
ENSG00000130734	84971	ATG4D	autophagy related 4D cysteine peptidase	674.899918909254	0.70251137477486	3.08405415285295e-18
ENSG00000166734	113201	CASC4	cancer susceptibility 4	2667.53377176563	-0.366348301774532	3.14327309747993e-18
ENSG00000103249	1186	CLCN7	chloride voltage-gated channel 7	907.24764557312	0.592870223050183	3.17806548663721e-18
ENSG00000183283	9802	DAZAP2	DAZ associated protein 2	2879.19850233976	-0.343489776294812	3.19751914153081e-18
ENSG00000160972	84988	PPP1R16A	protein phosphatase 1 regulatory subunit 16A	289.792701919122	1.11061006523852	3.42203244191813e-18
ENSG00000155760	8324	FZD7	frizzled class receptor 7	499.205995018459	0.798982361733568	3.54506908631734e-18
ENSG00000124333	6845	VAMP7	vesicle associated membrane protein 7	1869.25071525466	-0.434897039975716	3.54950527216922e-18
ENSG00000148337	25792	CIZ1	CDKN1A interacting zinc finger protein 1	2222.55812833602	0.411422607851084	3.55815919166373e-18
ENSG00000151090	7068	THRB	thyroid hormone receptor beta	108.634420883656	1.81691077628256	3.60465709304691e-18
ENSG00000176845	284207	METRNL	meteorin like, glial cell differentiation regulator	591.644467218098	0.753428647476903	3.79580222048219e-18
ENSG00000077147	56889	TM9SF3	transmembrane 9 superfamily member 3	6261.23484094762	-0.272646093806415	3.81165164538117e-18
ENSG00000104447	7227	TRPS1	transcriptional repressor GATA binding 1	1047.11197462796	0.571254567245812	3.91584009602384e-18
ENSG00000169764	7360	UGP2	UDP-glucose pyrophosphorylase 2	1325.46384483555	-0.480521915559203	4.04976797870488e-18
ENSG00000142102	80162	PGGHG	protein-glucosylgalactosylhydroxylysine glucosidase	332.17897397019	1.05302811244761	4.09258651404071e-18
ENSG00000127586	63922	CHTF18	chromosome transmission fidelity factor 18	670.708041661466	0.705812777652213	4.18854491255943e-18
ENSG00000033627	535	ATP6V0A1	ATPase H+ transporting V0 subunit a1	849.980251852121	0.640923385903208	4.46363741743796e-18
ENSG00000102753	3839	KPNA3	karyopherin subunit alpha 3	1803.6700688042	-0.441780452709091	4.57171026437016e-18
ENSG00000185088	6232	RPS27	ribosomal protein S27	1254.32884440756	-0.520231122907357	4.64045240098612e-18
ENSG00000137203	7020	TFAP2A	transcription factor AP-2 alpha	894.376293325101	0.58842968028927	4.79503258948051e-18
ENSG00000132561	4147	MATN2	matrilin 2	101.123053410005	-1.8441013942541	5.01177826582948e-18
ENSG00000197858	8733	GPAA1	glycosylphosphatidylinositol anchor attachment 1	2209.40582017571	0.404000258043021	5.60414979621248e-18
ENSG00000173812	10209	EIF1	eukaryotic translation initiation factor 1	8883.75932992351	0.247003657939341	5.74608496276527e-18
ENSG00000130304	376497	SLC27A1	solute carrier family 27 member 1	677.488331626001	0.680029172595728	6.01668825234495e-18
ENSG00000145794	84466	MEGF10	multiple EGF like domains 10	112.96153246808	1.81911445644208	6.1026667958065e-18
ENSG00000131558	60412	EXOC4	exocyst complex component 4	1716.57327289038	-0.429564861835936	6.3630663740989e-18
ENSG00000107625	79009	DDX50	DExD-box helicase 50	921.07312572668	-0.584399295005492	6.37228807817403e-18
ENSG00000163466	10109	ARPC2	actin related protein 2/3 complex subunit 2	4183.19349897847	-0.29930478174015	6.42374268954781e-18
ENSG00000165684	6621	SNAPC4	small nuclear RNA activating complex polypeptide 4	360.072872580417	0.925696686633579	6.42525679531461e-18
ENSG00000178921	5198	PFAS	phosphoribosylformylglycinamidine synthase	1139.42982172427	0.60521538570331	6.48060531448775e-18
ENSG00000241553	10093	ARPC4	actin related protein 2/3 complex subunit 4	1849.89329411422	-0.416974798549372	6.552399144459e-18
ENSG00000173068	54796	BNC2	basonuclin 2	1000.15249175893	-0.562802249824359	6.65874410821417e-18
ENSG00000105323	11100	HNRNPUL1	heterogeneous nuclear ribonucleoprotein U like 1	8867.25985678685	-0.236771558944136	6.70506919958104e-18
ENSG00000214176	440456	PLEKHM1P1	Pleckstrin Homology And RUN Domain Containing M1 Pseudogene 1	187.834929452061	1.29755110564498	7.0891255885092e-18
ENSG00000218739	100505876	CEBPZOS	CEBPZ opposite strand	739.304331477999	-0.647582260458072	7.90832372146024e-18
ENSG00000106723	10927	SPIN1	spindlin 1	2290.68277503487	-0.402996105737935	8.40768952826943e-18
ENSG00000164574	55568	GALNT10	polypeptide N-acetylgalactosaminyltransferase 10	3165.95254796542	-0.352481858422633	8.40768952826943e-18
ENSG00000130764	57470	LRRC47	leucine rich repeat containing 47	869.214215326885	-0.623473099099397	8.43019487410531e-18
ENSG00000108773	2648	KAT2A	lysine acetyltransferase 2A	700.688049010567	0.659722242561747	8.77304480524117e-18
ENSG00000148677	27063	ANKRD1	ankyrin repeat domain 1	3994.22360090248	-0.337277109982668	9.13123022862442e-18
ENSG00000146242	7162	TPBG	trophoblast glycoprotein	1108.86239257466	0.52129213429301	9.19250464333942e-18
ENSG00000088448	55608	ANKRD10	ankyrin repeat domain 10	932.72551127658	0.577948161880979	9.73224442313245e-18
ENSG00000113532	7903	ST8SIA4	ST8 alpha-N-acetyl-neuraminide alpha-2,8-sialyltransferase 4	176.38831502546	1.49940860705108	9.86481759180071e-18
ENSG00000013441	1195	CLK1	CDC like kinase 1	480.904004301767	0.851519105986539	1.04692561991422e-17
ENSG00000173805	9001	HAP1	huntingtin associated protein 1	167.806950486133	1.41879560717954	1.06290920680127e-17
ENSG00000196205	158078	EEF1A1P5	Eukaryotic Translation Elongation Factor 1 Alpha 1 Pseudogene 5	151.695436060526	1.47541661340014	1.07873539580983e-17
ENSG00000186193	89958	SAPCD2	suppressor APC domain containing 2	721.250301140315	0.73683399860304	1.15483944917023e-17
ENSG00000188522	644815	FAM83G	family with sequence similarity 83 member G	519.245873143729	0.78404919609604	1.17733717211392e-17
ENSG00000143384	4170	MCL1	MCL1, BCL2 family apoptosis regulator	4601.16833609467	-0.297486341551106	1.19461912247111e-17
ENSG00000106615	6009	RHEB	Ras homolog, mTORC1 binding	1829.77553633797	-0.417776234038814	1.2223538848929e-17
ENSG00000087087	51593	SRRT	serrate, RNA effector molecule	2263.42592277994	0.383604873755872	1.25053265252816e-17
ENSG00000039523	79567	RIPOR1	RHO family interacting cell polarization regulator 1	1232.48960225899	0.494387587866982	1.2886984379234e-17
ENSG00000171735	23261	CAMTA1	calmodulin binding transcription activator 1	755.56242480389	-0.677173803359432	1.31232052678889e-17
ENSG00000119820	84272	YIPF4	Yip1 domain family member 4	814.520105936133	-0.595377198638415	1.32126147998048e-17
ENSG00000169871	81844	TRIM56	tripartite motif containing 56	1220.7240775454	0.524910756440223	1.32698765663934e-17
ENSG00000198753	5365	PLXNB3	plexin B3	991.982740384467	0.679260247108747	1.38550572446396e-17
ENSG00000106617	51422	PRKAG2	protein kinase AMP-activated non-catalytic subunit gamma 2	504.795875102491	-0.770820914819819	1.55258429481838e-17
ENSG00000100219	7494	XBP1	X-box binding protein 1	1041.33953101068	0.546851394986091	1.6056835712871e-17
ENSG00000116199	9917	FAM20B	FAM20B, glycosaminoglycan xylosylkinase	1645.06367060468	-0.47669226346768	1.60867555254911e-17
ENSG00000125633	54520	CCDC93	coiled-coil domain containing 93	695.377774685671	0.724943270017429	1.60980505739738e-17
ENSG00000167173	56905	C15orf39	chromosome 15 open reading frame 39	516.498461108857	0.76189514779266	1.63255060033008e-17
ENSG00000187109	4673	NAP1L1	nucleosome assembly protein 1 like 1	7166.02233820986	-0.261269662823572	1.63728919241183e-17
ENSG00000103460	27324	TOX3	TOX high mobility group box family member 3	292.117538383234	-0.985880504630497	1.64379728893279e-17
ENSG00000185324	8558	CDK10	cyclin dependent kinase 10	804.467303011493	0.659951457961527	1.65089150094081e-17
ENSG00000162368	51727	CMPK1	cytidine/uridine monophosphate kinase 1	4178.10368645654	-0.311727955624771	1.90808194077496e-17
ENSG00000127481	23352	UBR4	ubiquitin protein ligase E3 component n-recognin 4	3929.97292542242	0.741553864768741	1.93491085243709e-17
ENSG00000240583	358	AQP1	aquaporin 1 (Colton blood group)	80.5025397902393	-2.12827411697057	1.95902855313398e-17
ENSG00000029993	3149	HMGB3	high mobility group box 3	2844.02113489335	-0.336509013538431	2.00282424154869e-17
ENSG00000124155	51604	PIGT	phosphatidylinositol glycan anchor biosynthesis class T	2826.92544022113	-0.356365214549011	2.00282424154869e-17
ENSG00000115363	84141	EVA1A	eva-1 homolog A, regulator of programmed cell death	710.569408843695	-0.642996423055787	2.0133719177958e-17
ENSG00000120889	8795	TNFRSF10B	TNF receptor superfamily member 10b	1457.4674171777	0.485380679557487	2.03037694036123e-17
ENSG00000078747	83737	ITCH	itchy E3 ubiquitin protein ligase	1626.45794379074	-0.457172643966688	2.16757312669599e-17
ENSG00000198843	51714	SELENOT	selenoprotein T	1029.65339948739	-0.549252204891089	2.28890976549322e-17
ENSG00000181222	5430	POLR2A	RNA Polymerase II Subunit A	4141.29125859569	0.292799317854654	2.29266691473798e-17
ENSG00000173848	10276	NET1	neuroepithelial cell transforming 1	1311.89968595327	-0.489544074577683	2.30207764696517e-17
ENSG00000115419	2744	GLS	glutaminase	2964.2723884574	-0.337617515842371	2.31949276644468e-17
ENSG00000153233	5801	PTPRR	protein tyrosine phosphatase, receptor type R	509.815368605119	-0.767352873842699	2.42406755571257e-17
ENSG00000113580	2908	NR3C1	nuclear receptor subfamily 3 group C member 1	1930.58670392697	-0.428149628621354	2.56359414700923e-17
ENSG00000198252	6815	STYX	serine/threonine/tyrosine interacting protein	644.952586266215	-0.676827769556629	2.63986507265098e-17
ENSG00000142507	5694	PSMB6	proteasome subunit beta 6	2379.6349943485	-0.368905781410739	2.71607299682568e-17
ENSG00000205903	100131017	ZNF316	zinc finger protein 316	1168.88561350283	0.537777367605732	2.72559305175571e-17
ENSG00000125967	63941	NECAB3	N-terminal EF-hand calcium binding protein 3	543.130008338281	0.726564750229365	2.77674255678168e-17
ENSG00000107798	3988	LIPA	lipase A, lysosomal acid type	1522.03241088976	-0.458577396828746	2.812551277597e-17
ENSG00000130560	10422	UBAC1	UBA domain containing 1	751.655132085177	0.673489373483409	3.0025037022388e-17
ENSG00000198837	9909	DENND4B	DENN domain containing 4B	964.472118545147	0.601845793138326	3.00592836645453e-17
ENSG00000139926	122786	FRMD6	FERM domain containing 6	664.094344352898	-0.669009788320208	3.48225630243069e-17
ENSG00000125944	10236	HNRNPR	heterogeneous nuclear ribonucleoprotein R	4844.24324069183	-0.277332565667	3.55300661786784e-17
ENSG00000099797	9524	TECR	trans-2,3-enoyl-CoA reductase	2476.82903660181	-0.381984348926388	3.60454623398759e-17
ENSG00000159069	54461	FBXW5	F-box and WD repeat domain containing 5	1707.38756280881	0.481809687088647	3.60454623398759e-17
ENSG00000171604	51523	CXXC5	CXXC finger protein 5	2470.90471270565	-0.385027746509778	4.20060045543855e-17
ENSG00000160991	80228	ORAI2	ORAI calcium release-activated calcium modulator 2	2356.85301180742	-0.393626128396537	4.31876021839598e-17
ENSG00000120254	25902	MTHFD1L	methylenetetrahydrofolate dehydrogenase (NADP+ dependent) 1 like	1330.64078542783	0.499466066028191	4.37388937214087e-17
ENSG00000166833	89797	NAV2	neuron navigator 2	1188.7297827002	-0.499391500961398	4.45016266397727e-17
ENSG00000119865	25927	CNRIP1	cannabinoid receptor interacting protein 1	676.537446055877	-0.682367153807388	4.888103185112e-17
ENSG00000231290	149773	APCDD1L-DT	APCDD1L divergent transcript	105.531026813016	-1.73901218498766	4.96005281361731e-17
ENSG00000149428	10525	HYOU1	hypoxia up-regulated 1	5814.58783784201	0.281911025232539	5.18238082112585e-17
ENSG00000114279	2257	FGF12	fibroblast growth factor 12	468.697058997235	-0.809328115737704	5.34795124699917e-17
ENSG00000100311	5155	PDGFB	platelet derived growth factor subunit B	205.071193349163	-1.16955182243437	5.35827807550693e-17
ENSG00000106609	55069	TMEM248	transmembrane protein 248	2181.34103755417	-0.390008780255672	5.46764077964208e-17
ENSG00000130529	54795	TRPM4	transient receptor potential cation channel subfamily M member 4	221.749580095882	1.14598414830386	5.61685291381913e-17
ENSG00000270647	8148	TAF15	TATA-box binding protein associated factor 15	3455.76935392897	0.366280309963091	5.71041774362822e-17
ENSG00000162928	5194	PEX13	peroxisomal biogenesis factor 13	599.418648754785	-0.684661045026981	5.76692991257429e-17
ENSG00000136048	55332	DRAM1	DNA damage regulated autophagy modulator 1	469.914291455239	-0.845851574694023	6.30850294123806e-17
ENSG00000159433	57519	STARD9	StAR related lipid transfer domain containing 9	509.963098465502	0.817510050890574	6.47201657724114e-17
ENSG00000197774	197342	EME2	essential meiotic structure-specific endonuclease subunit 2	222.26699235696	1.20151850945557	6.5450082497483e-17
ENSG00000198918	6170	RPL39	ribosomal protein L39	320.934215493836	-0.932256397906339	6.75043493575542e-17
ENSG00000168280	3800	KIF5C	kinesin family member 5C	734.158353046966	-0.636380929888265	6.94667434355763e-17
ENSG00000088538	1795	DOCK3	dedicator of cytokinesis 3	382.504024438253	0.896044741837236	7.3041477963148e-17
ENSG00000147155	10682	EBP	emopamil binding protein (sterol isomerase)	1534.47573971046	-0.468433775763415	7.73254925958075e-17
ENSG00000111640	2597	GAPDH	glyceraldehyde-3-phosphate dehydrogenase	31512.9387697018	-0.212546633894366	8.10889591389344e-17
ENSG00000188488	5104	SERPINA5	serpin family A member 5	179.259125799277	-1.29816229273913	8.14616935367325e-17
ENSG00000124181	5335	PLCG1	phospholipase C gamma 1	2272.5742513679	0.397915287643154	8.19283581443065e-17
ENSG00000214135	220729	LOC220729	succinate dehydrogenase complex flavoprotein subunit A pseudogene	177.15645095491	1.39751654987711	8.30025380411968e-17
ENSG00000090924	64857	PLEKHG2	pleckstrin homology and RhoGEF domain containing G2	1094.505682625	0.523233847359279	8.31932755773366e-17
ENSG00000070476	79364	ZXDC	ZXD family zinc finger C	443.155905166779	0.840016237501787	8.38408979921062e-17
ENSG00000117602	11123	RCAN3	RCAN family member 3	792.795981681965	-0.666439527567886	8.83482469987782e-17
ENSG00000167074	7008	TEF	TEF, PAR bZIP transcription factor	328.381508814567	0.937124371752861	9.0362378878963e-17
ENSG00000176853	157769	FAM91A1	family with sequence similarity 91 member A1	3072.03104735314	0.332152896502112	9.16432360470185e-17
ENSG00000170523	3889	KRT83	keratin 83	79.5611558985335	-2.01914209033224	9.57555432961789e-17
ENSG00000138594	29766	TMOD3	tropomodulin 3	1876.70526129164	-0.406507907975783	9.66862360056861e-17
ENSG00000086065	51510	CHMP5	charged multivesicular body protein 5	1329.66294751743	-0.481810812808998	9.74365789076131e-17
ENSG00000157064	23057	NMNAT2	nicotinamide nucleotide adenylyltransferase 2	252.764555504912	-1.03729841491661	9.89545546646983e-17
ENSG00000105726	57130	ATP13A1	ATPase 13A1	1439.91747394818	0.494815232068885	9.90218011774069e-17
ENSG00000107249	169792	GLIS3	GLIS family zinc finger 3	1935.24565040808	-0.40529765363714	9.9794488873058e-17
ENSG00000112319	2070	EYA4	EYA transcriptional coactivator and phosphatase 4	1656.50081747528	0.44856077963262	1.00344921877929e-16
ENSG00000198258	59286	UBL5	ubiquitin like 5	1041.76621095822	-0.532043332346996	1.00727743274593e-16
ENSG00000187840	1978	EIF4EBP1	eukaryotic translation initiation factor 4E binding protein 1	750.933478337171	0.635144125275935	1.06149997751445e-16
ENSG00000140391	10099	TSPAN3	tetraspanin 3	4049.56187557407	-0.28868048300519	1.08314717287037e-16
ENSG00000189339	728661	SLC35E2B	solute carrier family 35 member E2B	1095.00348910029	-0.503144599501052	1.09738117196088e-16
ENSG00000167900	7083	TK1	thymidine kinase 1	2217.1633098187	-0.412718414213546	1.12174054987024e-16
ENSG00000177283	8325	FZD8	frizzled class receptor 8	316.000876853352	1.01484544313901	1.14163475066333e-16
ENSG00000142864	26135	SERBP1	SERPINE1 mRNA binding protein 1	7217.53847213978	-0.238968249690268	1.16564579031273e-16
ENSG00000196235	6829	SUPT5H	SPT5 homolog, DSIF elongation factor subunit	3431.88141876239	0.317202758227523	1.1689673049657e-16
ENSG00000235173	51236	HGH1	HGH1 homolog	688.38885125893	0.642966664411022	1.22487618965678e-16
ENSG00000111912	135112	NCOA7	nuclear receptor coactivator 7	648.616304863708	0.666176276249981	1.37425607117993e-16
ENSG00000140859	3801	KIFC3	kinesin family member C3	1463.77112288856	0.440254890272248	1.44215281481304e-16
ENSG00000232119	28985	MCTS1	MCTS1, re-initiation and release factor	1115.52544054296	-0.507850917929109	1.45465566966461e-16
ENSG00000136167	3936	LCP1	lymphocyte cytosolic protein 1	288.246192614314	0.98522251273483	1.50234669138422e-16
ENSG00000170558	1000	CDH2	cadherin 2	2812.31507318381	0.337660664145767	1.50297487206976e-16
ENSG00000184867	9823	ARMCX2	armadillo repeat containing, X-linked 2	286.493993409879	0.990534578523431	1.50357593909917e-16
ENSG00000141551	1453	CSNK1D	casein kinase 1 delta	2651.92102570756	0.351882217064898	1.58537901459355e-16
ENSG00000197892	23303	KIF13B	kinesin family member 13B	641.747343780255	0.6958200252816	1.60132108873402e-16
ENSG00000162430	57190	SELENON	selenoprotein N	2615.92612060977	-0.365327852218535	1.61281612771242e-16
ENSG00000124571	57510	XPO5	exportin 5	1602.10787179125	0.428950548854694	1.68220118625135e-16
ENSG00000115486	2677	GGCX	gamma-glutamyl carboxylase	871.524159672662	-0.576890159608988	1.68581325927487e-16
ENSG00000134590	8933	RTL8C	retrotransposon Gag like 8C	3547.82856381054	-0.304604361152756	1.72443139769101e-16
ENSG00000116815	965	CD58	CD58 molecule	823.195001660676	-0.578921732389038	1.85409288977696e-16
ENSG00000167680	10501	SEMA6B	semaphorin 6B	2296.01565775035	0.406917734166894	1.85645391759386e-16
ENSG00000186567	56971	CEACAM19	carcinoembryonic antigen related cell adhesion molecule 19	68.022821835613	2.33178989507079	1.86582479212295e-16
ENSG00000157827	114793	FMNL2	formin like 2	1705.11391735013	0.410805096101599	1.87618549589365e-16
ENSG00000099625	255057	CBARP	CACN beta subunit associated regulatory protein	219.57715303431	1.20322656837848	1.87684816687875e-16
ENSG00000140534	90381	TICRR	TOPBP1 interacting checkpoint and replication regulator	780.934680944147	0.653257121321745	1.9272370013449e-16
ENSG00000146007	153527	ZMAT2	zinc finger matrin-type 2	1407.2688272695	-0.46450141424666	1.9652756882334e-16
ENSG00000138600	84888	SPPL2A	signal peptide peptidase like 2A	2449.63740940352	-0.397584852590376	1.98908660017319e-16
ENSG00000198756	23127	COLGALT2	collagen beta(1-O)galactosyltransferase 2	372.264562527861	0.874898873201663	2.13521958586179e-16
ENSG00000148843	22984	PDCD11	programmed cell death 11	1294.43501158706	0.468202127198485	2.18399141562538e-16
ENSG00000138029	3032	HADHB	hydroxyacyl-CoA dehydrogenase trifunctional multienzyme complex subunit beta	1581.32911236674	-0.466506275652718	2.2123143132471e-16
ENSG00000021826	1373	CPS1	carbamoyl-phosphate synthase 1	394.035361911899	-0.839425043242334	2.29653547763954e-16
ENSG00000129473	599	BCL2L2	BCL2 like 2	585.027432995147	0.70930066396316	2.54142738883203e-16
ENSG00000108854	64750	SMURF2	SMAD specific E3 ubiquitin protein ligase 2	924.846897928199	-0.550666905670131	2.54968490024118e-16
ENSG00000057608	2665	GDI2	GDP dissociation inhibitor 2	5134.68959919115	-0.264251969863547	2.74758517554463e-16
ENSG00000123159	10755	GIPC1	GIPC PDZ domain containing family member 1	2610.03422848698	0.351501276229232	2.75376559724962e-16
ENSG00000138758	55752	SEPTIN11	septin 11	3217.73740290538	-0.316333652739406	2.86284878544395e-16
ENSG00000143776	8476	CDC42BPA	CDC42 binding protein kinase alpha	2227.79505270849	0.38490240629496	2.8943516679298e-16
ENSG00000105849	221830	TWISTNB	TWIST neighbor	746.202453971504	-0.613819841134056	2.90250076523861e-16
ENSG00000178802	4351	MPI	mannose phosphate isomerase	526.623118411676	-0.72650492536307	2.90926258083465e-16
ENSG00000117707	5629	PROX1	prospero homeobox 1	261.676427622851	1.08308341741606	2.91358619311774e-16
ENSG00000114796	54800	KLHL24	kelch like family member 24	1097.73102036574	0.516586984367715	2.94079950167943e-16
ENSG00000175899	2	A2M	alpha-2-macroglobulin	204.70937916882	1.23506667204664	3.04362513417262e-16
ENSG00000167291	125058	TBC1D16	TBC1 domain family member 16	1698.91568501414	0.425001265505621	3.04727570703515e-16
ENSG00000006451	5898	RALA	RAS like proto-oncogene A	1425.9029664731	-0.443317488104531	3.09207988730619e-16
ENSG00000146425	6993	DYNLT1	dynein light chain Tctex-type 1	1479.28121456089	-0.486053778153395	3.12032283582544e-16
ENSG00000128050	10606	PAICS	phosphoribosylaminoimidazole carboxylase and phosphoribosylaminoimidazolesuccinocarboxamide synthase	9791.33673228839	-0.248832934636872	3.17131499509098e-16
ENSG00000101558	9218	VAPA	VAMP associated protein A	2858.63392998573	-0.3311604048082	3.26083174369114e-16
ENSG00000174996	64837	KLC2	kinesin light chain 2	829.906886462482	0.57787727257569	3.6782632292094e-16
ENSG00000147140	4841	NONO	non-POU domain containing octamer binding	10162.1455893793	-0.206370052489634	3.73197728767221e-16
ENSG00000170962	80310	PDGFD	platelet derived growth factor D	345.353924650382	-0.876460636420688	3.83686561692498e-16
ENSG00000196781	7088	TLE1	transducin like enhancer of split 1	737.358244591787	0.648326335703307	3.83686561692498e-16
ENSG00000099904	29801	ZDHHC8	zinc finger DHHC-type containing 8	715.546569201792	0.636122589470733	4.03290584600082e-16
ENSG00000206573	440944	THUMPD3-AS1	THUMPD3 antisense RNA 1	377.206999182395	0.864915601762398	4.24257509130895e-16
ENSG00000143772	3707	ITPKB	inositol-trisphosphate 3-kinase B	586.863862087112	0.686162512581616	4.31962455201449e-16
ENSG00000181773	2827	GPR3	G protein-coupled receptor 3	167.123559652221	1.32815519301889	4.51253086712752e-16
ENSG00000158528	55607	PPP1R9A	protein phosphatase 1 regulatory subunit 9A	468.502688210322	0.760250855660732	4.56976589097548e-16
ENSG00000122884	5033	P4HA1	prolyl 4-hydroxylase subunit alpha 1	1703.32598517695	-0.496090549191116	4.68657023307753e-16
ENSG00000146648	1956	EGFR	epidermal growth factor receptor	1535.40082137959	-0.459948428973464	4.78426532322996e-16
ENSG00000235162	387882	C12orf75	chromosome 12 open reading frame 75	900.302877520021	-0.547065641946709	4.83867164998152e-16
ENSG00000070444	4335	MNT	MAX network transcriptional repressor	432.904044606872	0.845703640845942	4.92472030169823e-16
ENSG00000170961	3037	HAS2	hyaluronan synthase 2	251.099201151623	-1.05990647553238	5.17265450876553e-16
ENSG00000128274	53947	A4GALT	alpha 1,4-galactosyltransferase (P blood group)	434.291161310255	0.791454291750927	5.33190315383869e-16
ENSG00000163728	151613	TTC14	tetratricopeptide repeat domain 14	434.309961420094	0.809996086512637	5.54272432266004e-16
ENSG00000101040	23613	ZMYND8	zinc finger MYND-type containing 8	1074.13228684043	-0.518137786385387	5.71384516377129e-16
ENSG00000177225	347862	GATD1	glutamine amidotransferase like class 1 domain containing 1	988.566195008507	0.56196195056225	5.88281159851676e-16
ENSG00000176393	6051	RNPEP	arginyl aminopeptidase	2096.09209654363	-0.398435423127425	6.36549568890635e-16
ENSG00000115919	8942	KYNU	kynureninase	185.291380058684	-1.20385675530189	6.52206545683871e-16
ENSG00000111269	1389	CREBL2	cAMP responsive element binding protein like 2	1153.73409405301	-0.520672756523973	6.67136709509637e-16
ENSG00000068383	3632	INPP5A	inositol polyphosphate-5-phosphatase A	645.680502518067	-0.640290759546236	6.81995661524592e-16
ENSG00000183718	84851	TRIM52	tripartite motif containing 52	181.713566115075	1.26321947960703	7.02925631655512e-16
ENSG00000137962	9411	ARHGAP29	Rho GTPase activating protein 29	1008.56933501737	-0.568230133865349	7.35739152260369e-16
ENSG00000171401	3860	KRT13	keratin 13	32.930745256358	-4.36378632917987	7.4091011341472e-16
ENSG00000138326	6229	RPS24	ribosomal protein S24	6937.0834544536	-0.247065036300849	7.97884437680913e-16
ENSG00000166272	54838	WBP1L	WW domain binding protein 1 like	1138.56282043953	-0.506229566915126	8.32182016252638e-16
ENSG00000063244	11338	U2AF2	U2 small nuclear RNA auxiliary factor 2	4846.86088433291	0.260359346475799	8.93711417427679e-16
ENSG00000074696	51495	HACD3	3-hydroxyacyl-CoA dehydratase 3	2712.28544836239	-0.348187523666379	8.94020050703656e-16
ENSG00000160685	51043	ZBTB7B	zinc finger and BTB domain containing 7B	1399.35125255231	0.45321558287494	9.29661747362857e-16
ENSG00000168785	10098	TSPAN5	tetraspanin 5	455.67155151542	-0.810235834969926	1.01521200054807e-15
ENSG00000237190	91368	CDKN2AIPNL	CDKN2A interacting protein N-terminal like	595.043432470556	-0.657796506835201	1.12088555270377e-15
ENSG00000132256	85363	TRIM5	tripartite motif containing 5	227.001127617179	-1.07871934413265	1.12827370503603e-15
ENSG00000101384	182	JAG1	jagged 1	2710.00076561667	-0.36699879850439	1.20932572852529e-15
ENSG00000138771	57619	SHROOM3	shroom family member 3	1407.86308267393	-0.450360241395176	1.24105167662444e-15
ENSG00000115216	29959	NRBP1	nuclear receptor binding protein 1	2746.40721606144	-0.339677168365843	1.24871432895408e-15
ENSG00000135373	26298	EHF	ETS homologous factor	43.2099931091544	-2.90187384506569	1.27413869592404e-15
ENSG00000128283	11135	CDC42EP1	CDC42 effector protein 1	2184.40186042307	-0.360618026725362	1.29999233221333e-15
ENSG00000078018	4133	MAP2	microtubule associated protein 2	712.897105261632	0.615371947757969	1.30309827491446e-15
ENSG00000105426	5802	PTPRS	protein tyrosine phosphatase, receptor type S	2699.75270212432	-0.343140244077855	1.30309827491446e-15
ENSG00000151702	2313	FLI1	Fli-1 proto-oncogene, ETS transcription factor	299.378337928558	-0.925818252903181	1.30309827491446e-15
ENSG00000071575	28951	TRIB2	tribbles pseudokinase 2	2672.86929846586	0.343200010427332	1.32031046069412e-15
ENSG00000113300	57472	CNOT6	CCR4-NOT transcription complex subunit 6	1591.48803838273	-0.435178929910011	1.36471999440673e-15
ENSG00000180891	404093	CUEDC1	CUE domain containing 1	2462.11823997104	-0.356593250179108	1.46407037525271e-15
ENSG00000135454	2583	B4GALNT1	beta-1,4-N-acetyl-galactosaminyltransferase 1	797.600224118569	0.570323240402522	1.52596844178908e-15
ENSG00000086666	54469	ZFAND6	zinc finger AN1-type containing 6	1408.33439729172	-0.477453876348896	1.54253153397118e-15
ENSG00000120149	4488	MSX2	msh homeobox 2	143.075106594934	-1.37899729985969	1.5540391158476e-15
ENSG00000146094	79930	DOK3	docking protein 3	96.2572500240395	1.8986236378742	1.5540391158476e-15
ENSG00000138795	51176	LEF1	lymphoid enhancer binding factor 1	250.34562773279	-1.07329445918132	1.64957333765127e-15
ENSG00000163346	57326	PBXIP1	PBX homeobox interacting protein 1	1665.49539770667	-0.410966555772223	1.66847751137758e-15
ENSG00000166598	7184	HSP90B1	heat shock protein 90 beta family member 1	16179.0752786202	-0.189142163404709	1.70654179656606e-15
ENSG00000086062	2683	B4GALT1	beta-1,4-galactosyltransferase 1	3246.47614912898	-0.325603143362184	1.91506225771647e-15
ENSG00000168564	55602	CDKN2AIP	CDKN2A interacting protein	645.676753203752	-0.630174980660892	2.00670390936738e-15
ENSG00000197872	81553	FAM49A	family with sequence similarity 49 member A	152.202155756222	-1.30091678876771	2.04505405886558e-15
ENSG00000104442	55156	ARMC1	armadillo repeat containing 1	960.595448589738	-0.515972873879043	2.12895745660883e-15
ENSG00000104957	81576	CCDC130	coiled-coil domain containing 130	502.224642020759	0.745441572842743	2.32032103548704e-15
ENSG00000271601	128077	LIX1L	limb and CNS expressed 1 like	986.034744699187	-0.526711810640014	2.3300370323749e-15
ENSG00000144713	6161	RPL32	ribosomal protein L32	8201.63947084837	-0.225147780500397	2.35127423841932e-15
ENSG00000203668	1122	CHML	CHM like, Rab escort protein 2	935.90498839602	0.554758118985985	2.36865583545819e-15
ENSG00000084693	60509	AGBL5	ATP/GTP binding protein like 5	575.561957462677	-0.663810588570427	2.45345772260072e-15
ENSG00000146085	4594	MUT	methylmalonyl-CoA mutase	1675.34132978235	-0.403582127154437	2.45345772260072e-15
ENSG00000198157	79366	HMGN5	high mobility group nucleosome binding domain 5	149.358594183143	1.35206094165494	2.544425774481e-15
ENSG00000076984	5609	MAP2K7	mitogen-activated protein kinase kinase 7	627.917392766706	0.654055852912346	2.75427742571986e-15
ENSG00000142149	30811	HUNK	hormonally up-regulated Neu-associated kinase	57.3956845047198	2.53206127802475	2.75427742571986e-15
ENSG00000187210	2650	GCNT1	glucosaminyl (N-acetyl) transferase 1, core 2	341.587323787334	-0.86401481141736	2.77059939428778e-15
ENSG00000145623	9180	OSMR	oncostatin M receptor	1448.58687295884	0.452713674255189	2.79920543399066e-15
ENSG00000077782	2260	FGFR1	fibroblast growth factor receptor 1	641.812252837244	0.646052188208545	3.18845744572434e-15
ENSG00000131171	6451	SH3BGRL	SH3 domain binding glutamate rich protein like	1453.41831896321	-0.442851726148326	3.30037329319828e-15
ENSG00000168710	10768	AHCYL1	adenosylhomocysteinase like 1	3459.0929577553	-0.313028292801193	3.33718273307815e-15
ENSG00000138180	55165	CEP55	centrosomal protein 55	2738.5060302028	-0.338572984554305	3.41095723022701e-15
ENSG00000184007	8073	PTP4A2	protein tyrosine phosphatase type IVA, member 2	3306.04118561113	-0.33734297385061	3.67331629316721e-15
ENSG00000152952	5352	PLOD2	procollagen-lysine,2-oxoglutarate 5-dioxygenase 2	2075.96765819086	-0.389192038424605	3.69425113423695e-15
ENSG00000119801	51646	YPEL5	yippee like 5	877.152937628099	-0.546677388794693	4.38394028538233e-15
ENSG00000013573	1663	DDX11	DEAD/H-box helicase 11	409.083270684031	0.831098609488488	4.41451193296257e-15
ENSG00000151693	8853	ASAP2	ArfGAP with SH3 domain, ankyrin repeat and PH domain 2	829.197813713891	-0.570059681120087	4.5790828665818e-15
ENSG00000187531	51547	SIRT7	sirtuin 7	535.352297264563	0.689278317529089	5.1456206286386e-15
ENSG00000113749	3274	HRH2	histamine receptor H2	41.7913190896236	4.88948504453925	5.18231681499728e-15
ENSG00000144381	3329	HSPD1	heat shock protein family D (Hsp60) member 1	6996.94771238587	0.234984693527716	5.32109887701745e-15
ENSG00000112159	23195	MDN1	midasin AAA ATPase 1	872.324496804469	0.61935810762473	5.58532467131336e-15
ENSG00000223705	155400	NSUN5P1	NOP2/Sun RNA methyltransferase family member 5 pseudogene 1	152.888397581589	1.40526145858334	5.65771726014447e-15
ENSG00000171314	5223	PGAM1	phosphoglycerate mutase 1	1844.5035774683	-0.374257712137143	5.71598059903323e-15
ENSG00000197157	27044	SND1	staphylococcal nuclease and tudor domain containing 1	5065.95706343135	0.255921300809969	6.3265811151435e-15
ENSG00000168894	51255	RNF181	ring finger protein 181	528.798832988546	-0.689125678610012	6.33415705970135e-15
ENSG00000141985	6455	SH3GL1	SH3 domain containing GRB2 like 1, endophilin A2	2216.29731875283	0.385816593251176	6.45032339830018e-15
ENSG00000189067	9516	LITAF	lipopolysaccharide induced TNF factor	1279.74341061162	-0.449700733685797	6.93668100411512e-15
ENSG00000130175	5589	PRKCSH	protein kinase C substrate 80K-H	5432.61157933455	0.275052629970893	7.07850871068859e-15
ENSG00000130816	1786	DNMT1	DNA methyltransferase 1	2864.06574157005	0.328343337990569	7.07850871068859e-15
ENSG00000148730	1979	EIF4EBP2	eukaryotic translation initiation factor 4E binding protein 2	3061.07983174755	-0.310133082516906	7.15143890333464e-15
ENSG00000100065	29775	CARD10	caspase recruitment domain family member 10	427.365861928216	-0.804534973752224	7.33054249612468e-15
ENSG00000205336	9289	ADGRG1	adhesion G protein-coupled receptor G1	3413.93718398739	0.325136515359534	7.62214060575663e-15
ENSG00000260428	642658	SCX	scleraxis bHLH transcription factor	42.1205814204672	3.31532557936216	7.81597195642318e-15
ENSG00000138448	3685	ITGAV	integrin subunit alpha V	6169.34026952789	-0.258750683577397	7.87820946777804e-15
ENSG00000158623	26958	COPG2	coatomer protein complex subunit gamma 2	1129.68170902884	-0.469236638312832	8.07459157127449e-15
ENSG00000188385	282973	JAKMIP3	Janus kinase and microtubule interacting protein 3	170.703486388124	1.23803825907743	8.13979187554815e-15
ENSG00000164951	54704	PDP1	pyruvate dehyrogenase phosphatase catalytic subunit 1	1838.57686136229	-0.425838773470108	8.34632719082883e-15
ENSG00000104866	284352	PPP1R37	protein phosphatase 1 regulatory subunit 37	1115.70451479318	0.481549878819846	8.50903429046176e-15
ENSG00000124570	5269	SERPINB6	serpin family B member 6	1670.71801800928	-0.403223932683875	8.92773862265115e-15
ENSG00000114770	10057	ABCC5	ATP binding cassette subfamily C member 5	585.519094760178	0.664834570190226	9.48729971342355e-15
ENSG00000163683	201895	SMIM14	small integral membrane protein 14	887.320608626343	-0.571044502509759	9.67496646776142e-15
ENSG00000103051	25839	COG4	component of oligomeric golgi complex 4	1429.51435406263	-0.42358804849353	1.05442654270269e-14
ENSG00000163029	79677	SMC6	structural maintenance of chromosomes 6	1125.36870011747	-0.4715044709767	1.09336914470845e-14
ENSG00000122550	55975	KLHL7	kelch like family member 7	1152.97676149281	-0.483407936473995	1.13545923050368e-14
ENSG00000151229	114134	SLC2A13	solute carrier family 2 member 13	126.639846250804	1.47562440522146	1.13897026005628e-14
ENSG00000135622	10505	SEMA4F	ssemaphorin 4F	440.516557578799	-0.742544141434518	1.1551649359267e-14
ENSG00000058272	4659	PPP1R12A	protein phosphatase 1 regulatory subunit 12A	1763.90864327757	-0.379052291745713	1.21925394891129e-14
ENSG00000196139	8644	AKR1C3	aldo-keto reductase family 1 member C3	660.015299011396	-0.626803072837852	1.21925394891129e-14
ENSG00000151612	152485	ZNF827	zinc finger protein 827	1480.69224329056	-0.446447380385062	1.25564484283097e-14
ENSG00000184465	253769	WDR27	WD repeat domain 27	293.046132369974	0.952575363519654	1.30634611638293e-14
ENSG00000118707	60436	TGIF2	TGFB induced factor homeobox 2	522.960533125809	-0.678359326782383	1.32425824269747e-14
ENSG00000130749	23211	ZC3H4	zinc finger CCCH-type containing 4	988.432206673087	-0.489117751209189	1.3406483802412e-14
ENSG00000172366	84331	MCRIP2	MAPK regulated corepressor interacting protein 2	320.45510314105	0.921642813594171	1.3406483802412e-14
ENSG00000113387	10923	SUB1	SUB1 homolog, transcriptional regulator	2678.39006682452	-0.329803643701246	1.34196378934696e-14
ENSG00000164543	9263	STK17A	serine/threonine kinase 17a	3968.10089437763	-0.271399443970627	1.40764445796507e-14
ENSG00000255529	81488	POLR2M	RNA polymerase II subunit M	503.073202510831	-0.719035867486279	1.41393773057135e-14
ENSG00000173064	283450	HECTD4	HECT domain E3 ubiquitin protein ligase 4	937.00134986036	0.549216206220576	1.43487310618191e-14
ENSG00000156136	1633	DCK	deoxycytidine kinase	1690.645782137	-0.409016312123609	1.45679903029725e-14
ENSG00000138675	2250	FGF5	fibroblast growth factor 5	67.1669057178528	-1.99431238452423	1.48311520855737e-14
ENSG00000163945	57654	UVSSA	UV stimulated scaffold protein A	694.918173784874	0.660993322521531	1.48311520855737e-14
ENSG00000129353	57153	SLC44A2	solute carrier family 44 member 2	1882.99961254092	0.382145894265141	1.48814289978875e-14
ENSG00000108829	55379	LRRC59	leucine rich repeat containing 59	5475.53909423638	0.241640322116112	1.49324074639386e-14
ENSG00000171867	5621	PRNP	prion protein	5567.60114705357	-0.238172829945941	1.50510419011207e-14
ENSG00000163399	476	ATP1A1	ATPase Na+/K+ transporting subunit alpha 1	42361.6838359543	-0.183663193362872	1.57674249690143e-14
ENSG00000117906	5955	RCN2	reticulocalbin 2	3510.11964416892	-0.287963751551958	1.58752371749418e-14
ENSG00000148926	133	ADM	adrenomedullin	136.519427828442	1.41220103988516	1.59026597289222e-14
ENSG00000050405	51474	LIMA1	LIM domain and actin binding 1	1474.86953957858	-0.418867842190786	1.60258529599399e-14
ENSG00000142892	10026	PIGK	phosphatidylinositol glycan anchor biosynthesis class K	1219.51933088566	-0.477175831574007	1.63628862243278e-14
ENSG00000188986	25920	NELFB	negative elongation factor complex member B	1744.36689453245	0.396531913328358	1.68001893075513e-14
ENSG00000136802	56262	LRRC8A	leucine rich repeat containing 8 VRAC subunit A	2229.50594543111	0.375588170273634	1.74829556215664e-14
ENSG00000178913	6879	TAF7	TATA-box binding protein associated factor 7	2778.6783009995	-0.328115646894443	1.81870739864173e-14
ENSG00000168883	10713	USP39	ubiquitin specific peptidase 39	1179.31244747677	-0.45626912683462	1.8264524662267e-14
ENSG00000125826	10616	RBCK1	RANBP2-type and C3HC4-type zinc finger containing 1	1003.37230856575	0.527669818166447	1.87014157462221e-14
ENSG00000118407	27145	FILIP1	filamin A interacting protein 1	128.533911817273	-1.3990835783672	1.89117390359569e-14
ENSG00000177943	158056	MAMDC4	MAM domain containing 4	85.4125253438134	1.95061397746668	1.91336994227756e-14
ENSG00000091317	54918	CMTM6	CKLF like MARVEL transmembrane domain containing 6	2194.35980103669	-0.355048200144535	1.93877271290078e-14
ENSG00000155959	7411	VBP1	VHL binding protein 1	2312.92198469717	-0.350156806380812	1.97760305735717e-14
ENSG00000137806	51103	NDUFAF1	NADH:ubiquinone oxidoreductase complex assembly factor 1	514.058416086289	-0.68395806534987	1.98168355256657e-14
ENSG00000143367	7286	TUFT1	tuftelin 1	399.690788125117	-0.775823033353817	2.02016672553391e-14
ENSG00000150551	116372	LYPD1	LY6/PLAUR domain containing 1	824.889244658038	-0.567406905956169	2.02532002252428e-14
ENSG00000143891	130589	GALM	galactose mutarotase	49.0495885076953	-2.49678216744386	2.07354131473692e-14
ENSG00000136450	6426	SRSF1	serine and arginine rich splicing factor 1	4448.08760048297	-0.287939433932098	2.14240196197323e-14
ENSG00000136279	28988	DBNL	drebrin like	2626.32168785922	-0.341595923634508	2.21068967752546e-14
ENSG00000155097	528	ATP6V1C1	ATPase H+ transporting V1 subunit C1	1261.57406500314	0.445206782744637	2.21949872886975e-14
ENSG00000112787	57666	FBRSL1	fibrosin like 1	632.923866093949	0.642033753825295	2.29389040242205e-14
ENSG00000144749	26018	LRIG1	leucine rich repeats and immunoglobulin like domains 1	553.818586890388	0.70365794516854	2.31072618226807e-14
ENSG00000176248	29882	ANAPC2	anaphase promoting complex subunit 2	693.133882793318	0.589455812409714	2.44621865646421e-14
ENSG00000132780	4678	NASP	nuclear autoantigenic sperm protein	3619.5765292047	0.297834341006207	2.50238010373053e-14
ENSG00000196428	9819	TSC22D2	TSC22 domain family member 2	700.996578086174	-0.571300026579527	2.5903330292081e-14
ENSG00000075340	119	ADD2	adducin 2	2436.74313895344	-0.374423816164523	2.60676941751433e-14
ENSG00000029153	56938	ARNTL2	aryl hydrocarbon receptor nuclear translocator like 2	764.909254555883	-0.647685908251151	2.68563420502296e-14
ENSG00000069011	5307	PITX1	paired like homeodomain 1	772.619964081803	0.567702005879731	2.72103462680732e-14
ENSG00000162511	7805	LAPTM5	lysosomal protein transmembrane 5	99.0102870839811	-1.57858174537988	2.79385668700897e-14
ENSG00000164070	22824	HSPA4L	heat shock protein family A (Hsp70) member 4 like	856.99025263837	0.554643409775087	2.94852060048628e-14
ENSG00000070423	55658	RNF126	ring finger protein 126	1070.1992324594	0.483504532929753	3.02109990557905e-14
ENSG00000137075	152006	RNF38	ring finger protein 38	844.869183274962	-0.55589581129218	3.02109990557905e-14
ENSG00000137955	5876	RABGGTB	Rab geranylgeranyltransferase beta subunit	1391.59781122912	0.416435530995334	3.03235576298226e-14
ENSG00000042286	84883	AIFM2	apoptosis inducing factor, mitochondria associated 2	992.895471593193	0.498536455496877	3.077391331862e-14
ENSG00000167548	8085	KMT2D	lysine methyltransferase 2D	1327.9941633972	1.00806887868101	3.0814200695046e-14
ENSG00000162378	79699	ZYG11B	zyg-11 family member B, cell cycle regulator	1634.8981426667	-0.396239035108651	3.09375232127071e-14
ENSG00000099399	4113	MAGEB2	MAGE family member B2	91.9948384939496	1.73393054151872	3.112716830308e-14
ENSG00000137804	51203	NUSAP1	nucleolar and spindle associated protein 1	4440.55886529459	-0.270640291791259	3.46181428978341e-14
ENSG00000175931	63893	UBE2O	ubiquitin conjugating enzyme E2 O	1021.87003643713	0.505068608780201	3.52237583497093e-14
ENSG00000146373	154214	RNF217	ring finger protein 217	1865.95421483153	-0.379961203021335	3.60352086228005e-14
ENSG00000106399	6119	RPA3	replication protein A3	669.222521330343	-0.585660017116604	3.62578556375023e-14
ENSG00000148484	6251	RSU1	Ras suppressor protein 1	1462.53351052069	-0.407892638277615	3.81083391083261e-14
ENSG00000105516	1628	DBP	D-box binding PAR bZIP transcription factor	380.855412414293	0.833529142967364	3.89791424081507e-14
ENSG00000163913	55764	IFT122	intraflagellar transport 122	515.106574419726	0.718704574747898	4.07345912618579e-14
ENSG00000211460	7247	TSN	translin	1553.06371992059	-0.403595864993188	4.12234374255708e-14
ENSG00000159352	5710	PSMD4	proteasome 26S subunit, non-ATPase 4	2222.56688012745	-0.333259235519242	4.45960105886052e-14
ENSG00000145416	55016	MARCHF1	membrane associated ring-CH-type finger 1	277.393439600217	0.922108281817276	4.66031780801747e-14
ENSG00000136111	9882	TBC1D4	TBC1 domain family member 4	279.483421535904	0.924800477559931	4.74235125436321e-14
ENSG00000108799	2145	EZH1	enhancer of zeste 1 polycomb repressive complex 2 subunit	517.592533006768	0.683880008900068	4.87383664547133e-14
ENSG00000196187	9725	TMEM63A	transmembrane protein 63A	467.398634985586	0.734228777403892	4.98192381083217e-14
ENSG00000101474	57136	APMAP	adipocyte plasma membrane associated protein	3176.14729739921	-0.291597190814309	4.99437370179707e-14
ENSG00000091622	83394	PITPNM3	PITPNM family member 3	360.586605417172	0.828259839740498	5.46786173559014e-14
ENSG00000160959	9684	LRRC14	leucine rich repeat containing 14	463.904443920931	0.72339664682802	5.49005067949276e-14
ENSG00000188636	84247	RTL6	retrotransposon Gag like 6	1362.29272585028	-0.411181127334826	5.51862996587744e-14
ENSG00000115091	10096	ACTR3	ARP3 actin related protein 3 homolog	5682.57257995581	-0.230401307097545	5.55132852363397e-14
ENSG00000103811	1512	CTSH	cathepsin H	354.819550689238	-0.815955820681478	5.84058656487448e-14
ENSG00000198948	9848	MFAP3L	microfibril associated protein 3 like	574.706514192888	0.676834573168821	5.89800189080923e-14
ENSG00000131188	80758	PRR7	proline rich 7, synaptic	591.476199229151	0.648309072652759	5.93345011712323e-14
ENSG00000148943	55327	LIN7C	lin-7 homolog C, crumbs cell polarity complex component	719.295734897903	-0.567399719607496	5.97090014779652e-14
ENSG00000137497	4926	NUMA1	nuclear mitotic apparatus protein 1	1615.59389558266	0.402087938096886	6.26871669918975e-14
ENSG00000081181	384	ARG2	arginase 2	123.376700672153	-1.3571342680481	6.37444345376329e-14
ENSG00000111961	23328	SASH1	SAM and SH3 domain containing 1	932.643463714821	0.512165907332877	6.79582149717632e-14
ENSG00000181649	7262	PHLDA2	pleckstrin homology like domain family A member 2	330.949945368205	0.851111899747717	7.02932930045954e-14
ENSG00000074755	23140	ZZEF1	zinc finger ZZ-type and EF-hand domain containing 1	1509.79022879215	0.416529405058766	7.06244399186633e-14
ENSG00000116030	7341	SUMO1	small ubiquitin-like modifier 1	1366.47998132992	-0.419178235332879	7.21609341449894e-14
ENSG00000122026	6144	RPL21	ribosomal protein L21	1957.6675132428	-0.39212706943877	7.46285212588278e-14
ENSG00000131844	64087	MCCC2	methylcrotonoyl-CoA carboxylase 2	2153.99491207268	-0.339488122151493	7.64032370161418e-14
ENSG00000139644	7009	TMBIM6	transmembrane BAX inhibitor motif containing 6	8334.00046965701	-0.213403736386808	7.87185054450056e-14
ENSG00000166181	8539	API5	apoptosis inhibitor 5	2697.5409078356	-0.303814242632803	8.20590663375151e-14
ENSG00000157456	9133	CCNB2	cyclin B2	2307.78220066193	-0.339089818647325	8.46026349036514e-14
ENSG00000141582	8535	CBX4	chromobox 4	692.82885745442	0.5750332923088	8.62759654897938e-14
ENSG00000023287	9821	RB1CC1	RB1 inducible coiled-coil 1	1730.60141313829	-0.380610066519425	8.89503189992206e-14
ENSG00000172331	669	BPGM	bisphosphoglycerate mutase	632.285617577963	-0.609560982286306	8.89503189992206e-14
ENSG00000256235	85027	SMIM3	small integral membrane protein 3	449.114467232519	-0.726408803793906	8.99042702068496e-14
ENSG00000100304	23170	TTLL12	tubulin tyrosine ligase like 12	1606.31106198138	0.393412425666264	9.06567956452521e-14
ENSG00000259207	3690	ITGB3	integrin subunit beta 3	421.141547273427	-0.870354404903178	1.00777771068329e-13
ENSG00000161547	6427	SRSF2	serine and arginine rich splicing factor 2	2876.84786685754	-0.305292535233826	1.00926906273938e-13
ENSG00000143376	81609	SNX27	sorting nexin family member 27	826.504811866203	-0.523698019997991	1.04919696874275e-13
ENSG00000046604	1829	DSG2	desmoglein 2	1024.48648275991	0.496249691619293	1.08257916921953e-13
ENSG00000126777	3895	KTN1	kinectin 1	7217.42022258954	-0.225623378308867	1.09237639471994e-13
ENSG00000146676	5814	PURB	purine rich element binding protein B	2780.05830102249	-0.358228894198921	1.10768327719281e-13
ENSG00000022267	2273	FHL1	four and a half LIM domains 1	987.626018291649	-0.483542850673409	1.11687300783654e-13
ENSG00000100154	23331	TTC28	tetratricopeptide repeat domain 28	608.841430203604	0.665811149627601	1.11869145239175e-13
ENSG00000099875	2872	MKNK2	MAP kinase interacting serine/threonine kinase 2	1592.04039581008	0.422452132280864	1.12314004451703e-13
ENSG00000188766	399473	SPRED3	sprouty related EVH1 domain containing 3	372.202899414283	0.776820373331002	1.1613013640448e-13
ENSG00000169499	59339	PLEKHA2	pleckstrin homology domain containing A2	873.821018091833	-0.527379055532708	1.17904174833406e-13
ENSG00000255717	23642	SNHG1	small nucleolar RNA host gene 1	562.773651656805	0.648175657081736	1.19311746124989e-13
ENSG00000143217	81607	NECTIN4	nectin cell adhesion molecule 4	28.7472109693724	-4.29630417853058	1.1977447643441e-13
ENSG00000167280	64772	ENGASE	endo-beta-N-acetylglucosaminidase	538.055114347529	0.709225307392139	1.21139323588337e-13
ENSG00000130821	6535	SLC6A8	solute carrier family 6 member 8	2860.44407424335	0.812106273646905	1.27131222743926e-13
ENSG00000104408	3646	EIF3E	eukaryotic translation initiation factor 3 subunit E	2742.04807758034	0.314047704793658	1.33656887276297e-13
ENSG00000137845	102	ADAM10	ADAM metallopeptidase domain 10	2714.40289302879	-0.316029634649356	1.34960995080459e-13
ENSG00000231991	304	ANXA2P2	Annexin A2 Pseudogene 2	276.098234526097	0.898709707374424	1.35664582488372e-13
ENSG00000125503	54776	PPP1R12C	protein phosphatase 1 regulatory subunit 12C	1443.24723932572	0.414793976209638	1.37475568166301e-13
ENSG00000076108	11176	BAZ2A	bromodomain adjacent to zinc finger domain 2A	1590.24184765486	0.388340991534865	1.38400933520975e-13
ENSG00000102054	5931	RBBP7	RB binding protein 7, chromatin remodeling factor	4297.59587436123	-0.267336829299015	1.42033515748155e-13
ENSG00000103269	9028	RHBDL1	rhomboid like 1	42.5484789755268	2.97621569889464	1.43232951920489e-13
ENSG00000175216	9793	CKAP5	cytoskeleton associated protein 5	7161.4727810583	0.227633619029954	1.43232951920489e-13
ENSG00000172037	3913	LAMB2	laminin subunit beta 2	3666.08352356267	0.283759210159954	1.45365796648819e-13
ENSG00000107581	8661	EIF3A	eukaryotic translation initiation factor 3 subunit A	6852.58762042217	0.230492804600064	1.4693795499161e-13
ENSG00000167861	283987	HID1	HID1 domain containing	81.0151160943374	1.8146387543322	1.54335894209662e-13
ENSG00000213763	62	ACTBP2	ACTB Pseudogene 2	76.3880734554943	1.84890346222231	1.54335894209662e-13
ENSG00000112306	6206	RPS12	ribosomal protein S12	9130.80033709182	-0.199627286486535	1.55720300446321e-13
ENSG00000141934	8612	PLPP2	phospholipid phosphatase 2	1482.83264209123	0.419653515009289	1.56839120879283e-13
ENSG00000130635	1289	COL5A1	collagen type V alpha 1 chain	9388.13276364755	-0.229870583505795	1.57353204019661e-13
ENSG00000114473	84223	IQCG	IQ motif containing G	767.690888058362	0.55284746126185	1.66178119275068e-13
ENSG00000178202	143888	KDELC2	KDEL motif containing 2	1680.46526920823	-0.379287671836819	1.66638675551951e-13
ENSG00000249341	100506444	LOC100506444	uncharacterized LOC100506444	28.4433083721434	-4.4511572189035	1.71064431178582e-13
ENSG00000169567	3094	HINT1	histidine triad nucleotide binding protein 1	4953.6438596831	-0.288392567023429	1.71072904588655e-13
ENSG00000251322	85358	SHANK3	SH3 and multiple ankyrin repeat domains 3	193.093751626159	1.12321060800847	1.72055848584849e-13
ENSG00000008130	65220	NADK	NAD kinase	1257.01667859508	-0.44739860923128	1.7364260304278e-13
ENSG00000141556	6904	TBCD	tubulin folding cofactor D	2077.35333683973	0.375528867446684	1.77225439583351e-13
ENSG00000022567	57210	SLC45A4	solute carrier family 45 member 4	382.393382377314	0.791359348365464	1.78536281933004e-13
ENSG00000148700	120	ADD3	adducin 3	846.352379494229	-0.517983502064977	1.85466684861904e-13
ENSG00000187325	51616	TAF9B	TATA-box binding protein associated factor 9b	1206.39835321167	-0.443536358053311	1.87612466995648e-13
ENSG00000169992	57555	NLGN2	neuroligin 2	1107.72381663499	0.466814241868758	1.90661896637703e-13
ENSG00000142634	79180	EFHD2	EF-hand domain family member D2	1249.35393571158	-0.43282595344054	1.91665218335505e-13
ENSG00000168374	378	ARF4	ADP ribosylation factor 4	3893.67775357017	-0.309849458094321	1.97464534526468e-13
ENSG00000128567	5420	PODXL	podocalyxin like	1049.11426547645	-0.463557917052259	1.99049291023703e-13
ENSG00000128731	8924	HERC2	HECT and RLD domain containing E3 ubiquitin protein ligase 2	1818.32932978187	0.435201391124603	2.05249960583811e-13
ENSG00000071564	6929	TCF3	transcription factor 3	2209.26435969972	0.336760740528302	2.08187190056781e-13
ENSG00000198925	79065	ATG9A	autophagy related 9A	2130.8703633331	-0.344443459728791	2.0920913255238e-13
ENSG00000184677	9923	ZBTB40	zinc finger and BTB domain containing 40	649.114749702812	0.609172253389552	2.1236199485678e-13
ENSG00000032389	7260	EIPR1	EARP complex and GARP complex interacting protein 1	508.386380113418	-0.667134382043854	2.15148200816135e-13
ENSG00000138032	5495	PPM1B	protein phosphatase, Mg2+/Mn2+ dependent 1B	1002.38484979522	-0.463561217562273	2.15716642576498e-13
ENSG00000125430	9953	HS3ST3B1	heparan sulfate-glucosamine 3-sulfotransferase 3B1	1464.57766533512	-0.414843131058645	2.39454172455723e-13
ENSG00000274012	378706	RN7SL2	RNA, 7SL, cytoplasmic 2	136.08997605717	-1.47085650506023	2.39867281608292e-13
ENSG00000033867	9497	SLC4A7	solute carrier family 4 member 7	1957.80092590384	0.393429582520591	2.41591659210759e-13
ENSG00000160781	79957	PAQR6	progestin and adipoQ receptor family member 6	111.92609169398	1.48333288651205	2.44819684421991e-13
ENSG00000126214	3831	KLC1	kinesin light chain 1	506.094589872358	0.69000259785976	2.53397444209862e-13
ENSG00000134440	4677	NARS	asparaginyl-tRNA synthetase	1702.1350349507	0.379517584734759	2.61823661488848e-13
ENSG00000250571	2738	GLI4	GLI family zinc finger 4	123.241957384189	1.41165268035886	2.63825922372027e-13
ENSG00000144043	113419	TEX261	testis expressed 261	1873.98203673782	-0.367075117273571	2.69098639246889e-13
ENSG00000164096	401152	C4orf3	chromosome 4 open reading frame 3	1410.29476835143	-0.462602460334984	2.70569831774512e-13
ENSG00000164828	23353	SUN1	Sad1 and UNC84 domain containing 1	2419.08859796666	0.315979931043241	2.70904897393021e-13
ENSG00000214022	29803	REPIN1	replication initiator 1	2104.94023213096	0.352347851856371	2.72484938339469e-13
ENSG00000176182	339344	MYPOP	Myb related transcription factor, partner of profilin	462.560312385181	0.709323521726087	2.75578298409015e-13
ENSG00000171223	3726	JUNB	JunB proto-oncogene, AP-1 transcription factor subunit	617.921020942147	-0.610219740707379	2.76917844260088e-13
ENSG00000227036	400619	LINC00511	long intergenic non-protein coding RNA 511	1606.43273573947	-0.377227645370091	2.81935916583429e-13
ENSG00000089220	5037	PEBP1	phosphatidylethanolamine binding protein 1	4128.81881218614	-0.259245475400524	2.90543771119071e-13
ENSG00000123684	9926	LPGAT1	lysophosphatidylglycerol acyltransferase 1	1997.04185024955	-0.352422864118087	2.90543771119071e-13
ENSG00000183726	23585	TMEM50A	transmembrane protein 50A	1675.94254992106	-0.379866194475678	2.96955991857102e-13
ENSG00000120437	39	ACAT2	acetyl-CoA acetyltransferase 2	1306.39428595399	-0.430642059113905	3.00160926860551e-13
ENSG00000168175	93487	MAPK1IP1L	mitogen-activated protein kinase 1 interacting protein 1 like	1560.83586806799	-0.405701493186846	3.06265110886472e-13
ENSG00000144218	3899	AFF3	AF4/FMR2 family member 3	121.753172717505	1.40009879457207	3.06929810528584e-13
ENSG00000123700	3759	KCNJ2	potassium voltage-gated channel subfamily J member 2	136.458217315809	-1.287854418925	3.10980412169538e-13
ENSG00000140948	23174	ZCCHC14	zinc finger CCHC-type containing 14	1288.10944587202	0.466239372702541	3.14679263247223e-13
ENSG00000124942	79026	AHNAK	AHNAK nucleoprotein	6294.998737421	0.288137609999837	3.15740002095992e-13
ENSG00000111319	6337	SCNN1A	sodium channel epithelial 1 alpha subunit	54.773642430228	-2.38028217059292	3.38412003048521e-13
ENSG00000158864	4720	NDUFS2	NADH:ubiquinone oxidoreductase core subunit S2	1887.3217176774	-0.349031152124543	3.40713589111876e-13
ENSG00000179981	10194	TSHZ1	teashirt zinc finger homeobox 1	392.544096865326	-0.742844313862899	3.45065485636913e-13
ENSG00000135476	9700	ESPL1	extra spindle pole bodies like 1, separase	876.481286408096	0.507938869940296	3.50374185355187e-13
ENSG00000075292	27332	ZNF638	zinc finger protein 638	1831.64455779864	-0.361392478809542	3.53180128801897e-13
ENSG00000130589	85441	HELZ2	helicase with zinc finger 2	544.69537703681	0.700071710417309	3.54876169655933e-13
ENSG00000174482	158038	LINGO2	leucine rich repeat and Ig domain containing 2	74.3504036337762	1.98522349463814	3.55378797057145e-13
ENSG00000072832	1400	CRMP1	collapsin response mediator protein 1	416.819214603332	-0.709551965191329	3.58688554208352e-13
ENSG00000165661	169714	QSOX2	quiescin sulfhydryl oxidase 2	578.473840191047	0.663462757830233	3.7007029561703e-13
ENSG00000099624	513	ATP5F1D	ATP synthase F1 subunit delta	1482.58358121338	0.397165825357343	3.70784833517029e-13
ENSG00000114166	8850	KAT2B	lysine acetyltransferase 2B	902.911801888339	0.507612919786559	3.81301544065262e-13
ENSG00000148296	6838	SURF6	surfeit 6	756.999606951337	0.535655485660084	3.90174562336916e-13
ENSG00000119711	4329	ALDH6A1	aldehyde dehydrogenase 6 family member A1	236.511919181927	-0.938696712668753	3.91140998579895e-13
ENSG00000152683	55676	SLC30A6	solute carrier family 30 member 6	782.556926525352	-0.551499845702385	3.95871798318483e-13
ENSG00000185485	255812	SDHAP1	succinate dehydrogenase complex flavoprotein subunit A pseudogene 1	123.110473161262	1.44380635376899	3.96414372596598e-13
ENSG00000085832	2060	EPS15	epidermal growth factor receptor pathway substrate 15	1680.90915779084	-0.371030510692771	4.106978239647e-13
ENSG00000160072	83858	ATAD3B	ATPase family, AAA domain containing 3B	488.382688037382	0.669696625872741	4.47586191708444e-13
ENSG00000102901	80152	CENPT	centromere protein T	507.549807229014	0.695517265111561	4.55256000351774e-13
ENSG00000157911	5192	PEX10	peroxisomal biogenesis factor 10	444.652162941883	-0.691478026447289	4.61666270476503e-13
ENSG00000085365	9522	SCAMP1	secretory carrier membrane protein 1	1567.76776003807	-0.399142651306314	5.12926552651069e-13
ENSG00000164885	1020	CDK5	cyclin dependent kinase 5	632.274435700211	-0.588748649654672	5.21806984992766e-13
ENSG00000165916	5702	PSMC3	proteasome 26S subunit, ATPase 3	3862.8409078131	-0.253162438813973	5.21806984992766e-13
ENSG00000239264	81567	TXNDC5	thioredoxin domain containing 5	234.379446798005	0.969791821603312	5.27847538904352e-13
ENSG00000014164	23144	ZC3H3	zinc finger CCCH-type containing 3	374.661411605958	0.771981108890585	5.29707762031164e-13
ENSG00000180573	8334	HIST1H2AC	histone cluster 1 H2A family member c	74.4197098240008	-1.75929839521483	5.29707762031164e-13
ENSG00000095002	4436	MSH2	mutS homolog 2	1058.97922629109	-0.451734132178208	5.35158283686176e-13
ENSG00000121060	7706	TRIM25	tripartite motif containing 25	1281.85337361966	0.417391616655881	5.43040943855414e-13
ENSG00000115641	2274	FHL2	four and a half LIM domains 2	885.601582568348	-0.53120354812316	5.44545688122994e-13
ENSG00000143761	375	ARF1	ADP ribosylation factor 1	7656.55733825257	0.211597095086635	5.61443732734020e-13
ENSG00000164904	501	ALDH7A1	aldehyde dehydrogenase 7 family member A1	1721.4813998557	-0.366744764693997	5.62635116180295e-13
ENSG00000172667	64393	ZMAT3	zinc finger matrin-type 3	648.689936997526	-0.584780304663478	5.62931955209535e-13
ENSG00000108846	8714	ABCC3	ATP binding cassette subfamily C member 3	1382.05977643085	0.397264620527108	5.97763772892486e-13
ENSG00000162521	5928	RBBP4	RB binding protein 4, chromatin remodeling factor	2811.71615371291	-0.302625263649192	6.07485460391973e-13
ENSG00000165434	283209	PGM2L1	phosphoglucomutase 2 like 1	2068.44130683838	-0.353002427012101	6.07485460391973e-13
ENSG00000171914	83660	TLN2	talin 2	1664.50647099091	0.388972301233359	6.08012631687861e-13
ENSG00000136811	4957	ODF2	outer dense fiber of sperm tails 2	1076.09935353688	0.480807189301328	6.09186878110115e-13
ENSG00000113391	83989	FAM172A	family with sequence similarity 172 member A	908.933272850584	-0.484502272855066	6.23683604211557e-13
ENSG00000212978	339803	LOC339803	uncharacterized LOC339803	194.387101910699	-1.05151700463249	6.25824710213852e-13
ENSG00000111142	10988	METAP2	methionyl aminopeptidase 2	1990.42702217153	-0.355391290810253	6.29223870352164e-13
ENSG00000129009	3671	ISLR	immunoglobulin superfamily containing leucine rich repeat	106.735712803065	-1.45571978731473	6.40079279790838e-13
ENSG00000112473	7922	SLC39A7	solute carrier family 39 member 7	4437.4423205313	0.243778822163861	6.59640570461124e-13
ENSG00000141994	56931	DUS3L	dihydrouridine synthase 3 like	693.63395128556	0.552920130612932	6.60595907758136e-13
ENSG00000227640	100507533	SOX21-AS1	SOX21 antisense divergent transcript 1	880.32370024877	-0.54203142886048	6.782249442073e-13
ENSG00000021574	6683	SPAST	spastin	566.295865972858	-0.603068657992257	6.79650715709211e-13
ENSG00000068438	24140	FTSJ1	FtsJ RNA methyltransferase homolog 1	1480.58385459955	-0.395280025916731	6.8096151783076e-13
ENSG00000026652	56895	AGPAT4	1-acylglycerol-3-phosphate O-acyltransferase 4	795.828463855483	0.538789200850888	6.89036982145903e-13
ENSG00000261221	100507290	ZNF865	zinc finger protein 865	456.123687676168	0.686260443342266	7.08075196252263e-13
ENSG00000104695	5516	PPP2CB	protein phosphatase 2 catalytic subunit beta	1508.7324685655	-0.398701417666999	7.10624403083635e-13
ENSG00000213190	10962	MLLT11	MLLT11, transcription factor 7 cofactor	2350.92515434163	-0.336472210991894	7.24366198561538e-13
ENSG00000230629	653658	RPS23P8	Ribosomal Protein S23 Pseudogene 8	58.2698877706382	2.20225754063884	7.41728700715385e-13
ENSG00000177732	6666	SOX12	SRY-box 12	1152.79581409793	0.50443803356636	7.65255540291085e-13
ENSG00000224411	3324	HSP90AA2P	Heat Shock Protein 90 Alpha Family Class A Member 2, Pseudogene	58.6632697921209	2.17675844841193	7.91268100110315e-13
ENSG00000162585	199990	FAAP20	Fanconi anemia core complex associated protein 20	832.49130986278	-0.542156582647968	8.09343309367823e-13
ENSG00000151135	90488	TMEM263	transmembrane protein 263	1565.90314626859	-0.381716821387809	8.16618417031469e-13
ENSG00000145860	153830	RNF145	ring finger protein 145	4224.34957360472	-0.249575140500064	8.23982366551179e-13
ENSG00000125285	11166	SOX21	SRY-box 21	2192.44466896495	-0.343484453201459	8.30646408953343e-13
ENSG00000148154	7357	UGCG	UDP-glucose ceramide glucosyltransferase	524.249977842282	-0.662552654662064	8.34056492699547e-13
ENSG00000102401	51566	ARMCX3	armadillo repeat containing, X-linked 3	1373.33645782912	0.404541428929044	8.49236389588659e-13
ENSG00000147416	526	ATP6V1B2	ATPase H+ transporting V1 subunit B2	2111.53966979843	0.354056334821573	8.53834941139426e-13
ENSG00000125772	56261	GPCPD1	glycerophosphocholine phosphodiesterase 1	937.441040585181	0.494890180155002	8.74804053433906e-13
ENSG00000176994	140775	SMCR8	Smith-Magenis syndrome chromosome region, candidate 8	790.610395080264	0.52280480664489	8.79849862506527e-13
ENSG00000174130	10333	TLR6	toll like receptor 6	230.275858496085	0.957259287622638	8.96885036171238e-13
ENSG00000140521	5428	POLG	DNA polymerase gamma, catalytic subunit	1109.80927186533	0.446046257572533	9.08913156152038e-13
ENSG00000152558	114908	TMEM123	transmembrane protein 123	2786.97437302505	-0.325023278599246	9.2797796780951e-13
ENSG00000118564	26234	FBXL5	F-box and leucine rich repeat protein 5	1614.79847445288	-0.368239257885624	9.33636747054639e-13
ENSG00000148362	286257	PAXX	PAXX, non-homologous end joining factor	408.246020081497	0.739606809557625	9.46569568711508e-13
ENSG00000116747	6738	TROVE2	TROVE domain family member 2	1376.24157311465	-0.450624522369158	9.51748974657171e-13
ENSG00000198892	149345	SHISA4	shisa family member 4	363.72214869037	-0.746038792480826	9.53731794999778e-13
ENSG00000221968	3995	FADS3	fatty acid desaturase 3	580.324458845305	0.602438676300124	9.67039235781032e-13
ENSG00000001084	2729	GCLC	glutamate-cysteine ligase catalytic subunit	975.749290292321	0.496635865819011	9.78593495472785e-13
ENSG00000211459	4549	RNR1	s-rRNA	6927.12080580906	0.81299460832006	9.87669821214652e-13
ENSG00000243927	64968	MRPS6	mitochondrial ribosomal protein S6	577.913197589216	-0.641497590398745	9.87761018837587e-13
ENSG00000116260	5768	QSOX1	quiescin sulfhydryl oxidase 1	2959.67214051487	-0.299599057152099	9.91885729001335e-13
ENSG00000118816	10983	CCNI	cyclin I	4599.89897236921	-0.233821030529678	9.98997546462243e-13
ENSG00000176720	666	BOK	BOK, BCL2 family apoptosis regulator	36.4337212039553	-2.79920821379782	1.0108636282928e-12
ENSG00000134138	4212	MEIS2	Meis homeobox 2	722.846703811058	-0.537860885176181	1.04832140740376e-12
ENSG00000134516	1794	DOCK2	dedicator of cytokinesis 2	118.495660946685	-1.344763004218	1.05280135619241e-12
ENSG00000153147	8467	SMARCA5	SWI/SNF related, matrix associated, actin dependent regulator of chromatin, subfamily a, member 5	3629.97879484661	-0.258026185278017	1.09906946343001e-12
ENSG00000133816	9645	MICAL2	microtubule associated monooxygenase, calponin and LIM domain containing 2	1094.4019425275	-0.447304884681031	1.11539889040482e-12
ENSG00000115183	85461	TANC1	tetratricopeptide repeat, ankyrin repeat and coiled-coil containing 1	1495.82762268718	0.420892336728661	1.12283276366825e-12
ENSG00000144036	23233	EXOC6B	exocyst complex component 6B	672.083357066023	-0.547488316786502	1.13373484021773e-12
ENSG00000185274	64409	GALNT17	polypeptide N-acetylgalactosaminyltransferase 17	1274.40090942236	-0.492915197396167	1.13594766835537e-12
ENSG00000038358	23644	EDC4	enhancer of mRNA decapping 4	1171.04994093638	0.433691469200413	1.15086163531148e-12
ENSG00000143013	8543	LMO4	LIM domain only 4	4250.34782269597	-0.285265553621968	1.17090992100547e-12
ENSG00000172531	5499	PPP1CA	protein phosphatase 1 catalytic subunit alpha	2323.71200666937	-0.322846250316559	1.2015976557917e-12
ENSG00000185046	56899	ANKS1B	ankyrin repeat and sterile alpha motif domain containing 1B	139.597770830392	-1.24388813114627	1.21183702222059e-12
ENSG00000225697	65010	SLC26A6	solute carrier family 26 member 6	1086.99447173423	0.513829200048382	1.23100588260008e-12
ENSG00000166803	9768	PCLAF	PCNA clamp associated factor	567.084456652409	-0.632448217617119	1.23132814066324e-12
ENSG00000235387	158376	SPAAR	small regulatory polypeptide of amino acid response	78.4322534647577	-1.75944309477624	1.23134069574379e-12
ENSG00000172954	253558	LCLAT1	lysocardiolipin acyltransferase 1	397.958281316263	-0.76785427676936	1.23267378708396e-12
ENSG00000139292	8549	LGR5	leucine rich repeat containing G protein-coupled receptor 5	29.7535372877236	-3.95984916621577	1.25019666748861e-12
ENSG00000127603	23499	MACF1	microtubule-actin crosslinking factor 1	8431.15186134309	0.615086682604639	1.36672443660434e-12
ENSG00000109111	6830	SUPT6H	SPT6 homolog, histone chaperone	3188.17254431103	0.275003307987633	1.36916856658538e-12
ENSG00000162599	4774	NFIA	nuclear factor I A	87.0129534550542	-1.57908384504681	1.44978109733658e-12
ENSG00000116128	607	BCL9	B cell CLL/lymphoma 9	1069.91065712635	-0.451002484443035	1.51483018061901e-12
ENSG00000175582	5870	RAB6A	RAB6A, member RAS oncogene family	1572.12232459198	-0.383323619320235	1.53961175060778e-12
ENSG00000165704	3251	HPRT1	hypoxanthine phosphoribosyltransferase 1	1352.03833796535	-0.396669729698421	1.57044906166226e-12
ENSG00000156787	93594	TBC1D31	TBC1 domain family member 31	302.17571705301	0.89173164606008	1.58441393593625e-12
ENSG00000118946	27253	PCDH17	protocadherin 17	55.9429105348206	-2.01678022811301	1.61827414794424e-12
ENSG00000156381	122416	ANKRD9	ankyrin repeat domain 9	760.757262813452	0.541518999460809	1.63990805732358e-12
ENSG00000118689	2309	FOXO3	forkhead box O3	859.709210004972	-0.493369547028098	1.65022938543682e-12
ENSG00000107862	8729	GBF1	golgi brefeldin A resistant guanine nucleotide exchange factor 1	2561.93251496115	0.340905109541626	1.69088905657941e-12
ENSG00000163516	55139	ANKZF1	ankyrin repeat and zinc finger domain containing 1	449.646327068135	0.683344360007386	1.74025013845467e-12
ENSG00000275832	57636	ARHGAP23	Rho GTPase activating protein 23	864.406825897165	-0.503674409917357	1.74955381680723e-12
ENSG00000164111	308	ANXA5	annexin A5	8624.22914159396	-0.186966242078035	1.76815513362336e-12
ENSG00000146733	5723	PSPH	phosphoserine phosphatase	849.871497409173	0.519917104426008	1.77260136483083e-12
ENSG00000165868	259217	HSPA12A	heat shock protein family A (Hsp70) member 12A	195.649423097725	1.06853436672617	1.83535018513503e-12
ENSG00000149313	60496	AASDHPPT	aminoadipate-semialdehyde dehydrogenase-phosphopantetheinyl transferase	1040.74868528061	-0.494252068586166	1.87307758892401e-12
ENSG00000175866	10458	BAIAP2	BAI1 associated protein 2	518.579681834964	0.659362761090896	1.88257153330618e-12
ENSG00000130332	51690	LSM7	LSM7 homolog, U6 small nuclear RNA and mRNA degradation associated	1047.93645511625	0.454154205930452	2.05510315838844e-12
ENSG00000131051	9584	RBM39	RNA binding motif protein 39	3228.97856412323	0.297781104777046	2.14096635942834e-12
ENSG00000197386	3064	HTT	huntingtin	3507.90948933649	0.318997396028124	2.25260335588942e-12
ENSG00000162836	51205	ACP6	acid phosphatase 6, lysophosphatidic	745.204986289984	-0.523054889351533	2.25785784427842e-12
ENSG00000148948	57689	LRRC4C	leucine rich repeat containing 4C	40.9297778310559	-2.52097265071503	2.26185774921221e-12
ENSG00000152147	79833	GEMIN6	gem nuclear organelle associated protein 6	218.497289081179	-0.988687343428966	2.26726074506948e-12
ENSG00000065154	4942	OAT	ornithine aminotransferase	3479.59518541602	-0.276414005601113	2.36474882712429e-12
ENSG00000184524	51286	CEND1	cell cycle exit and neuronal differentiation 1	482.400545248201	0.661391293080882	2.36747798390635e-12
ENSG00000168502	23255	MTCL1	microtubule crosslinking factor 1	2054.30963374501	0.357837608066709	2.49400266704425e-12
ENSG00000131473	47	ACLY	ATP citrate lyase	5780.95973569594	-0.219177487969533	2.50619319988316e-12
ENSG00000212747	441518	RTL8B	retrotransposon Gag like 8B	527.955514251919	-0.62444204495822	2.56130493647212e-12
ENSG00000087266	6452	SH3BP2	SH3 domain binding protein 2	1504.17115227172	0.430239112639157	2.57927953897562e-12
ENSG00000214530	10809	STARD10	StAR related lipid transfer domain containing 10	228.062505902842	-0.934523764302974	2.61742457893774e-12
ENSG00000107957	9644	SH3PXD2A	SH3 and PX domains 2A	1351.17831212128	0.434769354109887	2.63695452528e-12
ENSG00000160752	2224	FDPS	farnesyl diphosphate synthase	1713.34990101938	-0.352527545395994	2.68376536400754e-12
ENSG00000126883	8021	NUP214	nucleoporin 214	1010.33347915856	0.492790991965296	2.7149097218551e-12
ENSG00000181045	284129	SLC26A11	solute carrier family 26 member 11	134.59302153059	1.25601445844838	2.73972905758634e-12
ENSG00000167747	84798	C19orf48	chromosome 19 open reading frame 48	1193.4179128805	0.447014182644693	2.74556547255308e-12
ENSG00000178397	84792	FAM220A	family with sequence similarity 220 member A	519.039722515525	-0.627629236231967	2.75215714557129e-12
ENSG00000152556	5213	PFKM	phosphofructokinase, muscle	1224.33628632129	0.422659500248823	2.78491737092574e-12
ENSG00000166012	79101	TAF1D	TATA-box binding protein associated factor, RNA polymerase I subunit D	658.098206720073	0.561580738807181	2.78491737092574e-12
ENSG00000113108	10307	APBB3	amyloid beta precursor protein binding family B member 3	221.384719449944	1.06881389116834	2.79101320368305e-12
ENSG00000158604	222068	TMED4	transmembrane p24 trafficking protein 4	2027.84385342006	-0.339872034318849	2.79101320368305e-12
ENSG00000072571	3161	HMMR	hyaluronan mediated motility receptor	1363.51867557449	-0.432858045285229	2.88662249218801e-12
ENSG00000169062	65110	UPF3A	UPF3A, regulator of nonsense mediated mRNA decay	450.064375613915	0.704472468739359	2.88662249218801e-12
ENSG00000077549	832	CAPZB	capping actin protein of muscle Z-line beta subunit	4299.03752832037	-0.24046663442403	2.88684141271622e-12
ENSG00000162613	8880	FUBP1	far upstream element binding protein 1	1322.45630079772	0.401294214660325	2.94140511137987e-12
ENSG00000167114	10999	SLC27A4	solute carrier family 27 member 4	1188.33141264101	0.436023820657227	2.94140511137987e-12
ENSG00000064687	10347	ABCA7	ATP binding cassette subfamily A member 7	484.57745070372	0.641018591061104	2.98322863420225e-12
ENSG00000124356	10617	STAMBP	STAM binding protein	974.881676448149	-0.469926575232109	2.98322863420225e-12
ENSG00000154734	9510	ADAMTS1	ADAM metallopeptidase with thrombospondin type 1 motif 1	75.2917845412409	5.36966578114352	3.04215008764002e-12
ENSG00000105397	7297	TYK2	tyrosine kinase 2	1158.91636389989	0.421613492916941	3.04673216372781e-12
ENSG00000169718	64118	DUS1L	dihydrouridine synthase 1 like	1430.72573093808	0.398611292168462	3.05378948855494e-12
ENSG00000179889	23042	PDXDC1	pyridoxal dependent decarboxylase domain containing 1	1720.75664791843	0.350575592171919	3.0850543838829e-12
ENSG00000135387	4076	CAPRIN1	cell cycle associated protein 1	7802.60815341037	-0.206073200495317	3.10202877592982e-12
ENSG00000108852	4355	MPP2	membrane palmitoylated protein 2	258.710168202818	-0.914528982589925	3.13044955447037e-12
ENSG00000213977	30851	TAX1BP3	Tax1 binding protein 3	194.846432495574	-1.0215057328407	3.13044955447037e-12
ENSG00000080608	9933	PUM3	pumilio RNA binding family member 3	1036.72165983384	-0.438479074044006	3.17028190823775e-12
ENSG00000187961	339451	KLHL17	kelch like family member 17	459.141307851341	0.678770712171183	3.31293521875972e-12
ENSG00000106404	24146	CLDN15	claudin 15	123.805345815233	1.31515771714179	3.47833794153852e-12
ENSG00000117748	6118	RPA2	replication protein A2	1012.22864936642	-0.467265124384694	3.49917205322548e-12
ENSG00000131002	246126	TXLNGY	taxilin gamma pseudogene, Y-linked	355.958071852099	0.806135549555528	3.60759670976193e-12
ENSG00000198963	6096	RORB	RAR related orphan receptor B	135.41490675757	1.29161333343055	3.64201278479761e-12
ENSG00000127483	50809	HP1BP3	heterochromatin protein 1 binding protein 3	5037.43632184774	-0.250366803846516	3.8271597164977e-12
ENSG00000188177	376940	ZC3H6	zinc finger CCCH-type containing 6	176.139040789957	-1.04813462469855	3.8636420630159e-12
ENSG00000072274	7037	TFRC	transferrin receptor	8726.33948899726	0.246585095349368	3.94238452447325e-12
ENSG00000143337	26092	TOR1AIP1	torsin 1A interacting protein 1	1112.03617094118	-0.427137642884507	3.99528296537081e-12
ENSG00000127920	2791	GNG11	G protein subunit gamma 11	764.036921774654	-0.516443092858031	4.01486181417074e-12
ENSG00000172009	7064	THOP1	thimet oligopeptidase 1	1664.09380920415	0.364487864942669	4.03882584039018e-12
ENSG00000184277	80213	TM2D3	TM2 domain containing 3	423.510984102567	-0.67216650792881	4.18753838643858e-12
ENSG00000155111	23097	CDK19	cyclin dependent kinase 19	1377.63592765758	-0.391753223438637	4.20218990603396e-12
ENSG00000181690	5324	PLAG1	PLAG1 zinc finger	39.2778340618022	2.93679810520252	4.21537201611696e-12
ENSG00000104517	51366	UBR5	ubiquitin protein ligase E3 component n-recognin 5	1711.35496519952	0.365777633789884	4.23484659599815e-12
ENSG00000188015	6274	S100A3	S100 calcium binding protein A3	76.9502508587776	-1.65020102551783	4.23484659599815e-12
ENSG00000079215	6507	SLC1A3	solute carrier family 1 member 3	2291.82319837245	0.369545208044064	4.32676234227423e-12
ENSG00000148399	92715	DPH7	diphthamide biosynthesis 7	378.555873748903	0.75547144604613	4.37436976950241e-12
ENSG00000100216	56993	TOMM22	translocase of outer mitochondrial membrane 22	999.576887523956	-0.457671686722418	4.41088336225189e-12
ENSG00000120217	29126	CD274	CD274 molecule	211.59934587534	-0.955125025074909	4.50208825672624e-12
ENSG00000136261	28969	BZW2	basic leucine zipper and W2 domains 2	1553.11641946608	-0.393777384830379	4.51362700860499e-12
ENSG00000185624	5034	P4HB	prolyl 4-hydroxylase subunit beta	12451.5336666529	0.197525467766589	5.18082581841672e-12
ENSG00000173402	1605	DAG1	dystroglycan 1	6484.89086955769	-0.275618863936032	5.21464781278668e-12
ENSG00000003056	4074	M6PR	mannose-6-phosphate receptor, cation dependent	1287.64056673257	0.406801630333182	5.38538862980033e-12
ENSG00000161217	5130	PCYT1A	phosphate cytidylyltransferase 1, choline, alpha	1868.67446925541	0.347844798856718	5.45181547621924e-12
ENSG00000117528	5825	ABCD3	ATP binding cassette subfamily D member 3	2217.51879470509	-0.330378162862696	5.46663768211394e-12
ENSG00000151917	221336	BEND6	BEN domain containing 6	187.93658213202	-0.995760925398914	5.66202669315839e-12
ENSG00000196155	25894	PLEKHG4	pleckstrin homology and RhoGEF domain containing G4	119.454456753744	-1.30367057752454	5.8876601940263e-12
ENSG00000120802	7112	TMPO	thymopoietin	3287.45869945645	-0.269029448767896	5.95440896099306e-12
ENSG00000149557	9638	FEZ1	fasciculation and elongation protein zeta 1	1043.3677912884	-0.463675324519342	6.0199585154125e-12
ENSG00000108106	27338	UBE2S	ubiquitin conjugating enzyme E2 S	2814.00757732091	0.341576755717429	6.10664287689431e-12
ENSG00000104731	54758	KLHDC4	kelch domain containing 4	682.975755826084	0.529709238896443	6.2087263665778e-12
ENSG00000184640	10801	SEPTIN9	septin 9	5743.47998970809	-0.291448177904715	6.22254222514505e-12
ENSG00000034713	11345	GABARAPL2	GABA type A receptor associated protein like 2	1349.15333500407	-0.38782691680811	6.25748313259125e-12
ENSG00000128245	7533	YWHAH	tyrosine 3-monooxygenase/tryptophan 5-monooxygenase activation protein eta	2430.99778701363	-0.298323368127245	6.76401122542942e-12
ENSG00000113916	604	BCL6	B cell CLL/lymphoma 6	330.537786543685	0.776343587822398	7.01699516143011e-12
ENSG00000103335	9780	PIEZO1	piezo type mechanosensitive ion channel component 1	2690.07694540972	0.293261038357895	7.01803943661138e-12
ENSG00000073712	10979	FERMT2	fermitin family member 2	1059.24358570029	-0.445293422246387	7.11755918048016e-12
ENSG00000122958	9559	VPS26A	VPS26, retromer complex component A	2072.70744502468	-0.322747496415473	7.22699992687481e-12
ENSG00000083857	2195	FAT1	FAT atypical cadherin 1	6193.83931130269	0.271767890139924	7.71458288143054e-12
ENSG00000267519	284454	LOC284454	uncharacterized LOC284454	183.00193766186	1.15545078016465	8.12085144066738e-12
ENSG00000101367	22919	MAPRE1	microtubule associated protein RP/EB family member 1	4283.13304907798	-0.231437119849413	8.15878438514181e-12
ENSG00000020633	864	RUNX3	runt related transcription factor 3	213.223259785273	-0.968828603307287	8.26556829549678e-12
ENSG00000105711	6324	SCN1B	sodium voltage-gated channel beta subunit 1	252.596506537312	0.954809222085377	8.28351325734687e-12
ENSG00000153885	79047	KCTD15	potassium channel tetramerization domain containing 15	406.43809886646	0.710625912074577	8.50255344432595e-12
ENSG00000169100	293	SLC25A6	solute carrier family 25 member 6	9990.90931880696	0.193070132760448	8.65100848719712e-12
ENSG00000204120	26058	GIGYF2	GRB10 interacting GYF protein 2	1128.79117065051	0.428951934384429	8.65939372935203e-12
ENSG00000166471	440026	TMEM41B	transmembrane protein 41B	554.108677316213	-0.588370439671438	8.7690874713447e-12
ENSG00000138035	87178	PNPT1	polyribonucleotide nucleotidyltransferase 1	693.745556419433	-0.534496547758331	8.95010503668047e-12
ENSG00000198467	7169	TPM2	tropomyosin 2	168.305968198837	1.31976663458706	9.0305413459022e-12
ENSG00000197608	284371	ZNF841	zinc finger protein 841	359.601242446896	0.742732825234955	9.12525214806877e-12
ENSG00000165417	2957	GTF2A1	general transcription factor IIA subunit 1	1154.816818241	-0.411913463800571	9.26841338037459e-12
ENSG00000054793	10079	ATP9A	ATPase phospholipid transporting 9A (putative)	2784.44540485837	-0.276210858837784	9.40313787306087e-12
ENSG00000146729	2631	NIPSNAP2	nipsnap homolog 2	2203.58310413512	-0.33573076906101	9.49974534445646e-12
ENSG00000134057	891	CCNB1	cyclin B1	5198.12572723093	-0.250515784935484	9.52624418478589e-12
ENSG00000035862	7077	TIMP2	TIMP metallopeptidase inhibitor 2	6391.00911292678	0.217092126354424	9.64726613892376e-12
ENSG00000170638	80305	TRABD	TraB domain containing	614.544268370086	0.564497768108907	9.88828529521129e-12
ENSG00000102081	2332	FMR1	fragile X mental retardation 1	1767.72480351985	-0.340792290414061	1.02444595972136e-11
ENSG00000165689	10807	SDCCAG3	serologically defined colon cancer antigen 3	741.927139870528	0.50891967319456	1.03605138433445e-11
ENSG00000120837	4801	NFYB	nuclear transcription factor Y subunit beta	482.623973604244	-0.62367729511712	1.03736813267742e-11
ENSG00000152642	23171	GPD1L	glycerol-3-phosphate dehydrogenase 1 like	969.996802198714	-0.448609650851889	1.06119712845039e-11
ENSG00000213903	1241	LTB4R	leukotriene B4 receptor	119.090879819922	1.43206811844566	1.06959377150208e-11
ENSG00000100726	9894	TELO2	telomere maintenance 2	792.698220132939	0.502431623739216	1.08396583632588e-11
ENSG00000239332	100134259	LINC01119	long intergenic non-protein coding RNA 1119	39.6352999102222	-2.42477177603257	1.09828525354172e-11
ENSG00000168010	89849	ATG16L2	autophagy related 16 like 2	124.490624838909	1.34825173711969	1.12037945944229e-11
ENSG00000179094	5187	PER1	period circadian regulator 1	384.849041477346	0.707700920836447	1.1295284794218e-11
ENSG00000137409	23787	MTCH1	mitochondrial carrier 1	4407.02476486496	-0.230544271407009	1.15942102920886e-11
ENSG00000188290	57801	HES4	hes family bHLH transcription factor 4	447.637151590202	0.651908238581412	1.16340139197891e-11
ENSG00000172840	57546	PDP2	pyruvate dehyrogenase phosphatase catalytic subunit 2	488.464853429589	0.636066212559156	1.18580154568173e-11
ENSG00000160113	2063	NR2F6	nuclear receptor subfamily 2 group F member 6	1052.52732293372	0.447333585184446	1.23264677068397e-11
ENSG00000152778	24138	IFIT5	interferon induced protein with tetratricopeptide repeats 5	626.546080175886	-0.539804431786033	1.23697715161749e-11
ENSG00000011105	10867	TSPAN9	tetraspanin 9	803.24743950364	0.516197431535726	1.25893200965317e-11
ENSG00000196584	7516	XRCC2	X-ray repair cross complementing 2	498.910208245536	0.617126062304901	1.26310708633534e-11
ENSG00000008083	3720	JARID2	jumonji and AT-rich interaction domain containing 2	1252.91908517633	-0.409463199847424	1.27874653129504e-11
ENSG00000029364	55334	SLC39A9	solute carrier family 39 member 9	1261.40325175858	-0.390344000386476	1.28544557805047e-11
ENSG00000240694	10687	PNMA2	PNMA family member 2	473.054701987599	-0.638660815736956	1.2874040452458e-11
ENSG00000143554	11000	SLC27A3	solute carrier family 27 member 3	203.490677374373	0.977914012859482	1.35138574680004e-11
ENSG00000180694	169200	TMEM64	transmembrane protein 64	429.829575722256	-0.669141519125184	1.35138574680004e-11
ENSG00000105953	4967	OGDH	oxoglutarate dehydrogenase	3328.4432382421	0.275568233074567	1.35605639333983e-11
ENSG00000110628	5002	SLC22A18	solute carrier family 22 member 18	254.338052957527	0.877095021638566	1.3837074620473e-11
ENSG00000113716	22993	HMGXB3	HMG-box containing 3	1963.20471089859	0.325049154130294	1.38375168640091e-11
ENSG00000116991	57568	SIPA1L2	signal induced proliferation associated 1 like 2	1205.98993097007	0.450796267047013	1.38375168640091e-11
ENSG00000162512	9672	SDC3	syndecan 3	3914.08669526264	-0.278600905164289	1.38534833902494e-11
ENSG00000242294	101735302	STAG3L5P	stromal antigen 3-like 5 pseudogene	95.7065942694792	1.53081022301815	1.38534833902494e-11
ENSG00000140044	122953	JDP2	Jun dimerization protein 2	85.7233233949889	1.72127178728546	1.39206675799704e-11
ENSG00000022840	9921	RNF10	ring finger protein 10	2728.24136162621	-0.283802853923191	1.40899089052750e-11
ENSG00000167670	10036	CHAF1A	chromatin assembly factor 1 subunit A	1349.52755762141	0.382369620379673	1.50610692848627e-11
ENSG00000114861	27086	FOXP1	forkhead box P1	1223.32175923029	-0.428941305079021	1.52555686810621e-11
ENSG00000099889	421	ARVCF	ARVCF, delta catenin family member	244.592779925124	0.879778978005074	1.54267400717007e-11
ENSG00000197594	5167	ENPP1	ectonucleotide pyrophosphatase/phosphodiesterase 1	231.811754112543	-0.887638986892812	1.60165504919232e-11
ENSG00000168216	55788	LMBRD1	LMBR1 domain containing 1	756.262022634708	-0.502994620300124	1.67429160447391e-11
ENSG00000184557	9021	SOCS3	suppressor of cytokine signaling 3	794.9756540007	-0.502364345425307	1.68886251467173e-11
ENSG00000140374	2108	ETFA	electron transfer flavoprotein alpha subunit	2285.09669243232	-0.327869136415338	1.78472997662391e-11
ENSG00000073060	949	SCARB1	scavenger receptor class B member 1	711.905457457545	0.609084179001397	1.85183345634398e-11
ENSG00000203727	389432	SAMD5	sterile alpha motif domain containing 5	243.575273467944	-0.907880963211275	1.87628941642943e-11
ENSG00000148834	9446	GSTO1	glutathione S-transferase omega 1	1200.19352977993	-0.401056065131491	1.89448741299325e-11
ENSG00000074935	51175	TUBE1	tubulin epsilon 1	271.7802638793	0.851214607552897	1.90834694908311e-11
ENSG00000166128	51762	RAB8B	RAB8B, member RAS oncogene family	607.498968915017	-0.564171657058285	1.93141556299427e-11
ENSG00000184900	6612	SUMO3	small ubiquitin-like modifier 3	1899.70007618581	-0.329915006878157	2.00816339500174e-11
ENSG00000185634	399694	SHC4	SHC adaptor protein 4	215.624858895805	-0.915625372793487	2.03929328840344e-11
ENSG00000128510	51200	CPA4	carboxypeptidase A4	133.413059739297	-1.1858242672952	2.11711326878766e-11
ENSG00000185359	9146	HGS	hepatocyte growth factor-regulated tyrosine kinase substrate	1510.22845781122	0.377840861057217	2.13244066670238e-11
ENSG00000159461	267	AMFR	autocrine motility factor receptor	2638.16941786374	-0.283041551431995	2.13591220283525e-11
ENSG00000136247	55146	ZDHHC4	zinc finger DHHC-type containing 4	782.014412009698	-0.4956914518939	2.15889198913406e-11
ENSG00000064313	6873	TAF2	TATA-box binding protein associated factor 2	1035.41815165405	0.446993216650652	2.19590169105837e-11
ENSG00000121904	114784	CSMD2	CUB and Sushi multiple domains 2	577.756460418994	-0.577260267484033	2.1980781205403e-11
ENSG00000112183	221662	RBM24	RNA binding motif protein 24	439.323390310738	-0.648559855210506	2.21935457016747e-11
ENSG00000123131	10549	PRDX4	peroxiredoxin 4	2697.55470127568	-0.292341442601385	2.24082579620254e-11
ENSG00000089063	29058	TMEM230	transmembrane protein 230	1554.00551786397	-0.34805852971527	2.28915797889236e-11
ENSG00000106460	54664	TMEM106B	transmembrane protein 106B	1572.38264669024	-0.362787069402023	2.32272822430514e-11
ENSG00000186635	116985	ARAP1	ArfGAP with RhoGAP domain, ankyrin repeat and PH domain 1	837.020584548258	0.469461672973425	2.32433131129963e-11
ENSG00000175040	9435	CHST2	carbohydrate sulfotransferase 2	500.887055955028	0.652366984000377	2.35258066082745e-11
ENSG00000129116	23022	PALLD	palladin, cytoskeletal associated protein	10561.4779256938	-0.209873443834947	2.36359964814031e-11
ENSG00000141504	112483	SAT2	spermidine/spermine N1-acetyltransferase family member 2	744.258736745724	0.51626494433581	2.39332466881667e-11
ENSG00000148120	84909	C9orf3	chromosome 9 open reading frame 3	631.993681979033	-0.572846893721594	2.41120611295833e-11
ENSG00000185946	55599	RNPC3	RNA binding region (RNP1, RRM) containing 3	227.784964861475	0.939692909069819	2.43340549877069e-11
ENSG00000182481	3838	KPNA2	karyopherin subunit alpha 2	7662.8401987565	-0.189224328194506	2.43586942097375e-11
ENSG00000164144	27236	ARFIP1	ADP ribosylation factor interacting protein 1	1007.93511911626	-0.426403077531175	2.47739609730875e-11
ENSG00000087269	8602	NOP14	NOP14 nucleolar protein	924.321067117995	0.452383021293063	2.49940987841177e-11
ENSG00000211448	1734	DIO2	iodothyronine deiodinase 2	125.606658866602	-1.21720165635254	2.60993097612218e-11
ENSG00000168078	55872	PBK	PDZ binding kinase	1694.45218892606	-0.349061657851769	2.61926048102679e-11
ENSG00000146063	90933	TRIM41	tripartite motif containing 41	661.832227521458	0.593870165572402	2.68421969068175e-11
ENSG00000102172	6611	SMS	spermine synthase	4594.87034243025	-0.246784304105543	2.7130284732565e-11
ENSG00000166483	7465	WEE1	WEE1 G2 checkpoint kinase	1588.93659815527	-0.358015341695314	2.74403108422489e-11
ENSG00000162298	84447	SYVN1	synoviolin 1	669.31675440661	0.566126113532746	2.77684392998409e-11
ENSG00000139291	55266	TMEM19	transmembrane protein 19	605.637942087255	-0.564180907659341	2.7871054408116e-11
ENSG00000134107	8553	BHLHE40	basic helix-loop-helix family member e40	3172.57692701467	-0.260287107457572	2.78864843509442e-11
ENSG00000126458	6237	RRAS	RAS related	290.189547033426	-0.800907748415959	2.79779800202251e-11
ENSG00000186960	387978	LINC01551	long intergenic non-protein coding RNA 1551	282.930186833618	-0.819853914234899	2.80286481483266e-11
ENSG00000184254	220	ALDH1A3	aldehyde dehydrogenase 1 family member A3	247.216970010763	-0.953496782802082	2.8330060350269e-11
ENSG00000114902	28972	SPCS1	signal peptidase complex subunit 1	1516.65889717054	-0.35500767344135	2.85742615747623e-11
ENSG00000143398	8394	PIP5K1A	phosphatidylinositol-4-phosphate 5-kinase type 1 alpha	1985.71051959859	-0.309523610533143	2.88204236497826e-11
ENSG00000171241	79801	SHCBP1	SHC binding and spindle associated 1	4464.06398405965	-0.262008823538703	2.89129825973461e-11
ENSG00000006125	163	AP2B1	adaptor related protein complex 2 beta 1 subunit	9966.65175530571	-0.182529310560968	2.89859128221567e-11
ENSG00000122705	1211	CLTA	clathrin light chain A	3454.03755550689	0.251531795489435	2.93409837566102e-11
ENSG00000274180	256302	NATD1	N-acetyltransferase domain containing 1	275.744783690818	-0.818263542976673	2.93409837566102e-11
ENSG00000204634	11138	TBC1D8	TBC1 domain family member 8	203.229280481461	0.967663640704012	2.96512772564216e-11
ENSG00000164054	51246	SHISA5	shisa family member 5	2587.42528195855	-0.288054369123927	2.9735529083297e-11
ENSG00000184428	116447	TOP1MT	DNA topoisomerase I mitochondrial	387.561441690098	0.701561607287846	3.02921454274311e-11
ENSG00000163840	151636	DTX3L	deltex E3 ubiquitin ligase 3L	401.631010476458	-0.680213474993892	3.04030550666837e-11
ENSG00000179403	64856	VWA1	von Willebrand factor A domain containing 1	248.366083592324	0.883606173258979	3.08676512607431e-11
ENSG00000034053	321	APBA2	amyloid beta precursor protein binding family A member 2	980.612246018887	-0.453456966919622	3.13905652342251e-11
ENSG00000121481	6045	RNF2	ring finger protein 2	434.554128938073	-0.678239363945992	3.17893646168338e-11
ENSG00000183978	28958	COA3	cytochrome c oxidase assembly factor 3	640.306479452177	-0.525870089380484	3.20958851562175e-11
ENSG00000087074	23645	PPP1R15A	protein phosphatase 1 regulatory subunit 15A	1379.35694508827	0.398227671232671	3.30412385908097e-11
ENSG00000125520	56731	SLC2A4RG	SLC2A4 regulator	1279.91857677249	0.413338450812244	3.33787016698851e-11
ENSG00000117600	9890	PLPPR4	phospholipid phosphatase related 4	84.9997651952109	-1.51779783887003	3.33920948671167e-11
ENSG00000101003	9837	GINS1	GINS complex subunit 1	677.251545350415	-0.549581963541829	3.49181874637624e-11
ENSG00000166226	10576	CCT2	chaperonin containing TCP1 subunit 2	3776.87413287788	-0.24565318758084	3.54508310799728e-11
ENSG00000146067	54540	FAM193B	family with sequence similarity 193 member B	438.241084948854	0.653053042897378	3.63154790672932e-11
ENSG00000137831	55075	UACA	uveal autoantigen with coiled-coil domains and ankyrin repeats	1537.60835914253	-0.359362415364712	3.65877299067685e-11
ENSG00000173163	150684	COMMD1	copper metabolism domain containing 1	277.942564396179	-0.807178385102773	3.69843138146638e-11
ENSG00000105835	10135	NAMPT	nicotinamide phosphoribosyltransferase	1120.28234153982	0.420815184211441	3.69944412205878e-11
ENSG00000162517	553115	PEF1	penta-EF-hand domain containing 1	1015.68624011414	-0.424707616748153	3.72001349012863e-11
ENSG00000109065	26151	NAT9	N-acetyltransferase 9 (putative)	484.863700897733	0.621505351524214	3.7600182824032e-11
ENSG00000136274	23148	NACAD	NAC alpha domain containing	169.963573613167	-1.07472652557584	3.80045849861748e-11
ENSG00000198890	55170	PRMT6	protein arginine methyltransferase 6	560.780903437301	-0.564129113317101	3.92151966896545e-11
ENSG00000203706	574036	SERTAD4-AS1	SERTAD4 antisense RNA 1	80.9811885208002	-1.51599852491409	3.92895329935224e-11
ENSG00000133624	79970	ZNF767P	zinc finger family member 767, pseudogene	170.313260249031	1.07948127369147	3.9969487856382e-11
ENSG00000163320	8545	CGGBP1	CGG triplet repeat binding protein 1	1995.63516892598	-0.324963559207858	4.00537588622964e-11
ENSG00000119203	51692	CPSF3	cleavage and polyadenylation specific factor 3	1142.36344106391	-0.407481944976357	4.02614823213822e-11
ENSG00000198736	51734	MSRB1	methionine sulfoxide reductase B1	397.169920103692	-0.674264593455737	4.14452487371079e-11
ENSG00000227051	56967	C14orf132	chromosome 14 open reading frame 132	51.2515618862971	-1.95766920834008	4.17369922164699e-11
ENSG00000120875	1846	DUSP4	dual specificity phosphatase 4	372.009994058026	1.85149317322206	4.20660234079244e-11
ENSG00000149970	22866	CNKSR2	connector enhancer of kinase suppressor of Ras 2	149.88557426087	1.11608697516704	4.2333003996468e-11
ENSG00000018408	25937	WWTR1	WW domain containing transcription regulator 1	2296.06366729297	0.315429930187731	4.2730241762374e-11
ENSG00000165671	64324	NSD1	nuclear receptor binding SET domain protein 1	2499.22540949369	0.334454499338309	4.303398747487e-11
ENSG00000178980	6415	SELENOW	selenoprotein W	1119.739837639	-0.400957747876753	4.49429701555986e-11
ENSG00000114805	23007	PLCH1	phospholipase C eta 1	330.021294332628	0.776423049424086	4.62778914409194e-11
ENSG00000059122	84256	FLYWCH1	FLYWCH-type zinc finger 1	955.655608036547	0.510444964183947	4.71007259821541e-11
ENSG00000163798	22950	SLC4A1AP	solute carrier family 4 member 1 adaptor protein	629.620906249017	-0.557651681982285	4.71183356790987e-11
ENSG00000083799	1540	CYLD	CYLD lysine 63 deubiquitinase	1613.62507370612	-0.363984957784988	4.77348933257038e-11
ENSG00000058600	55718	POLR3E	RNA polymerase III subunit E	425.929807760936	0.689677402571214	4.95664422425662e-11
ENSG00000143106	5686	PSMA5	proteasome subunit alpha 5	2375.7877259307	-0.285691125203731	4.97092918880922e-11
ENSG00000003249	79007	DBNDD1	dysbindin domain containing 1	1422.54194372227	-0.39785843904969	5.05246418133445e-11
ENSG00000166750	162394	SLFN5	schlafen family member 5	985.124057570388	0.452406227492547	5.0945177414998e-11
ENSG00000169592	283899	INO80E	INO80 complex subunit E	421.58159068077	0.677572772841547	5.09783891537438e-11
ENSG00000059588	6894	TARBP1	TAR (HIV-1) RNA binding protein 1	641.507300753063	0.545368357137437	5.10591621968123e-11
ENSG00000127329	5787	PTPRB	protein tyrosine phosphatase, receptor type B	738.392603627779	-0.504982345661016	5.1405963104079e-11
ENSG00000126945	3188	HNRNPH2	heterogeneous nuclear ribonucleoprotein H2	1759.23895625859	-0.325833459956914	5.34521464959105e-11
ENSG00000144028	23020	SNRNP200	small nuclear ribonucleoprotein U5 subunit 200	5176.30846630183	0.221301656376313	5.42114499447062e-11
ENSG00000138413	3417	IDH1	isocitrate dehydrogenase (NADP(+)) 1, cytosolic	1644.64852508329	-0.338810178454578	5.50133761991271e-11
ENSG00000127415	3425	IDUA	iduronidase, alpha-L-	294.538306897308	0.779442862914319	5.66237813089669e-11
ENSG00000049541	5982	RFC2	replication factor C subunit 2	1544.85892144378	-0.345357075193589	5.69749487767608e-11
ENSG00000148842	54805	CNNM2	cyclin and CBS domain divalent metal cation transport mediator 2	471.97942016917	0.631484253435085	5.70416280130503e-11
ENSG00000198242	6147	RPL23A	ribosomal protein L23a	1467.39442150999	-0.373463677517971	5.74404026106836e-11
ENSG00000080503	6595	SMARCA2	SWI/SNF related, matrix associated, actin dependent regulator of chromatin, subfamily a, member 2	1819.47903348324	-0.322747453489859	5.80342017754426e-11
ENSG00000129968	81926	ABHD17A	abhydrolase domain containing 17A	733.065396352139	0.545398235117844	5.90019979507546e-11
ENSG00000002834	3927	LASP1	LIM and SH3 protein 1	3653.2292556559	-0.264438492387696	6.008714904264e-11
ENSG00000100526	1033	CDKN3	cyclin dependent kinase inhibitor 3	740.691498882	-0.491306908282144	6.008714904264e-11
ENSG00000180304	4947	OAZ2	ornithine decarboxylase antizyme 2	1754.04646255669	-0.349842930617964	6.06496542935966e-11
ENSG00000182095	84629	TNRC18	trinucleotide repeat containing 18	2832.53271507188	0.272593549147866	6.07534515260828e-11
ENSG00000128973	54982	CLN6	CLN6, transmembrane ER protein	976.214775531522	0.437977722925827	6.11462193037789e-11
ENSG00000170485	4862	NPAS2	neuronal PAS domain protein 2	87.238286628189	1.55376239129622	6.16510764844935e-11
ENSG00000084090	56910	STARD7	StAR related lipid transfer domain containing 7	3011.24203092319	-0.267956601111313	6.45435248408549e-11
ENSG00000138119	26509	MYOF	myoferlin	9522.52000984427	-0.181244896591856	6.56617846693195e-11
ENSG00000137076	7094	TLN1	talin 1	9482.01988309485	0.211370250629191	6.58474642182774e-11
ENSG00000171119	4902	NRTN	neurturin	318.906142693627	-0.759010522898877	6.61429369185554e-11
ENSG00000025796	11231	SEC63	SEC63 homolog, protein translocation regulator	2566.98956566892	0.311830775466787	6.68568579602849e-11
ENSG00000176170	8877	SPHK1	sphingosine kinase 1	193.849756427407	0.980785039143934	6.73145094581024e-11
ENSG00000162869	129285	PPP1R21	protein phosphatase 1 regulatory subunit 21	350.310797762422	-0.811461404448348	6.87819480498195e-11
ENSG00000100350	80020	FOXRED2	FAD dependent oxidoreductase domain containing 2	1670.29626657433	0.358961614632352	6.90421803278262e-11
ENSG00000126787	9787	DLGAP5	DLG associated protein 5	2124.90729143361	-0.315508079887231	6.90421803278262e-11
ENSG00000128191	54487	DGCR8	DGCR8, microprocessor complex subunit	718.910315153571	0.525005967150933	7.26286842380535e-11
ENSG00000215041	84461	NEURL4	neuralized E3 ubiquitin protein ligase 4	546.781663591474	0.621762717798284	7.36565679643302e-11
ENSG00000115457	3485	IGFBP2	insulin like growth factor binding protein 2	3214.70445741437	-0.265861082824947	7.47738393106474e-11
ENSG00000004487	23028	KDM1A	lysine demethylase 1A	2781.22357846873	-0.266682025823988	7.59187912282723e-11
ENSG00000173511	7423	VEGFB	vascular endothelial growth factor B	762.783930687647	0.519970991359436	7.72759421417080e-11
ENSG00000175893	340481	ZDHHC21	zinc finger DHHC-type containing 21	622.441217726844	0.559702209054532	7.76743357145594e-11
ENSG00000168264	359948	IRF2BP2	interferon regulatory factor 2 binding protein 2	1910.13839294666	-0.320656365282127	7.84739757147733e-11
ENSG00000101365	3420	IDH3B	isocitrate dehydrogenase 3 (NAD(+)) beta	1628.49754905383	-0.346336964807925	7.9410475279005e-11
ENSG00000197077	85379	KIAA1671	KIAA1671	450.648584436765	0.759220268176959	7.99241373436715e-11
ENSG00000135535	8763	CD164	CD164 molecule	5172.09422828239	-0.210741590357729	8.31555120990859e-11
ENSG00000160633	6294	SAFB	scaffold attachment factor B	2019.15953500469	0.305296522572748	8.59093358608259e-11
ENSG00000068650	23250	ATP11A	ATPase phospholipid transporting 11A	823.532423991863	0.515172487933547	8.67904598267001e-11
ENSG00000164465	285761	DCBLD1	discoidin, CUB and LCCL domain containing 1	1029.84883983501	-0.455919961751213	9.09518186627004e-11
ENSG00000147684	4715	NDUFB9	NADH:ubiquinone oxidoreductase subunit B9	2169.00752872147	0.302167843652377	9.73676794390912e-11
ENSG00000170776	11214	AKAP13	A-kinase anchoring protein 13	1508.49202268024	0.380555394333725	9.88216093356206e-11
ENSG00000197702	55742	PARVA	parvin alpha	1345.972759381	-0.38915762089027	9.9493840075729e-11
ENSG00000162961	84661	DPY30	dpy-30, histone methyltransferase complex regulatory subunit	405.45799518387	-0.658401877484036	1.04510191346443e-10
ENSG00000112406	51696	HECA	hdc homolog, cell cycle regulator	682.18023832218	-0.50894656870133	1.06942481756721e-10
ENSG00000063169	29998	BICRA	BRD4 interacting chromatin remodeling complex associated protein	408.967027139424	0.656964139280828	1.07157234544747e-10
ENSG00000156802	29028	ATAD2	ATPase family, AAA domain containing 2	2371.14950058176	0.296144897300638	1.074056710373e-10
ENSG00000129351	3609	ILF3	interleukin enhancer binding factor 3	8590.6308254421	0.179672665754846	1.07445834065721e-10
ENSG00000136935	2800	GOLGA1	golgin A1	732.60290965626	0.49586846833033	1.09631576503964e-10
ENSG00000142409	126208	ZNF787	zinc finger protein 787	528.417292955547	0.583865185898673	1.09645000016503e-10
ENSG00000100416	55687	TRMU	tRNA 5-methylaminomethyl-2-thiouridylate methyltransferase	686.708049230063	0.550231692831361	1.1157402980279e-10
ENSG00000039319	9765	ZFYVE16	zinc finger FYVE-type containing 16	1383.57757381477	0.362484831137697	1.1276632298944e-10
ENSG00000108679	3959	LGALS3BP	galectin 3 binding protein	7743.7490553567	0.204754187467606	1.1341002596073e-10
ENSG00000183199	3327	HSP90AB3P	Heat Shock Protein 90 Alpha Family Class B Member 3, Pseudogene	60.5992839485376	1.90538025730156	1.14745783146461e-10
ENSG00000203950	26071	RTL8A	retrotransposon Gag like 8A	1317.45643352238	-0.383603332380466	1.15051595066355e-10
ENSG00000196591	3066	HDAC2	histone deacetylase 2	3952.60998094961	-0.258662529699191	1.18015478235859e-10
ENSG00000185585	169611	OLFML2A	olfactomedin like 2A	764.31580815948	-0.502787398423181	1.18227235162567e-10
ENSG00000164649	55536	CDCA7L	cell division cycle associated 7 like	1187.09454792841	-0.383095873670036	1.20024868370491e-10
ENSG00000161692	80174	DBF4B	DBF4 zinc finger B	532.84465779237	0.579758853477607	1.20463673926397e-10
ENSG00000125977	8894	EIF2S2	eukaryotic translation initiation factor 2 subunit beta	2136.6073058869	0.300626605438228	1.20749153067844e-10
ENSG00000165672	10935	PRDX3	peroxiredoxin 3	2766.19774233208	-0.295598058380879	1.21694112057041e-10
ENSG00000187676	145173	B3GLCT	beta 3-glucosyltransferase	575.068656003787	-0.57351354779352	1.22449610315513e-10
ENSG00000156162	286148	DPY19L4	dpy-19 like 4	709.817772480293	-0.486568471703463	1.23538982362495e-10
ENSG00000095397	25861	WHRN	whirlin	396.91667621457	0.693244481517605	1.2900295392413e-10
ENSG00000235109	64288	ZSCAN31	zinc finger and SCAN domain containing 31	548.062707977338	-0.561578205054064	1.31161819445637e-10
ENSG00000136754	10006	ABI1	abl interactor 1	912.841932564615	-0.444274948349979	1.34136886770578e-10
ENSG00000129521	112399	EGLN3	egl-9 family hypoxia inducible factor 3	230.717564346102	-0.855182509207451	1.37412938117535e-10
ENSG00000205542	7114	TMSB4X	thymosin beta 4, X-linked	33708.483063867	-0.19695455887757	1.37929469406962e-10
ENSG00000130508	7837	PXDN	peroxidasin	3017.52600814941	-0.268509384591181	1.43213988231862e-10
ENSG00000126970	55906	ZC4H2	zinc finger C4H2-type containing	143.873762068727	1.13472718264521	1.44552844056641e-10
ENSG00000217128	96459	FNIP1	folliculin interacting protein 1	952.775262663585	0.440817530356049	1.44552844056641e-10
ENSG00000157191	55707	NECAP2	NECAP endocytosis associated 2	1044.2097823546	-0.42478404448414	1.44562499392942e-10
ENSG00000142611	63976	PRDM16	PR/SET domain 16	638.988023680904	-0.573084702301293	1.4993655699106e-10
ENSG00000100068	91355	LRP5L	LDL receptor related protein 5 like	70.7250283974836	1.9532904978609	1.50373158866039e-10
ENSG00000142698	84970	C1orf94	chromosome 1 open reading frame 94	28.6254746297242	-3.08137818473855	1.51999138171561e-10
ENSG00000179954	284297	SSC5D	scavenger receptor cysteine rich family member with 5 domains	269.079729245875	0.841470883860962	1.51999138171561e-10
ENSG00000132763	25974	MMACHC	methylmalonic aciduria (cobalamin deficiency) cblC type, with homocystinuria	173.512850926099	-0.994071534417438	1.54859505459368e-10
ENSG00000123374	1017	CDK2	cyclin dependent kinase 2	908.994071013584	-0.437905745368954	1.61044533617595e-10
ENSG00000203896	54923	LIME1	Lck interacting transmembrane adaptor 1	48.7093199754428	2.20741128502161	1.61044533617595e-10
ENSG00000143079	55917	CTTNBP2NL	CTTNBP2 N-terminal like	864.056915299464	-0.474814586709754	1.62803942094492e-10
ENSG00000109084	27346	TMEM97	transmembrane protein 97	894.422085903267	-0.433321383466669	1.64690171880054e-10
ENSG00000226752	253039	CUTALP	cutA divalent cation tolerance homolog-like, pseudogene	294.656212368406	0.75945446594139	1.65466536052534e-10
ENSG00000103018	80777	CYB5B	cytochrome b5 type B	2174.97180349365	-0.295286563362626	1.67944613608483e-10
ENSG00000144136	6574	SLC20A1	solute carrier family 20 member 1	2978.98929660503	-0.256303141745784	1.80034955846334e-10
ENSG00000155792	64798	DEPTOR	DEP domain containing MTOR interacting protein	41.8573308884299	2.3903595095117	1.80268716792885e-10
ENSG00000198838	6263	RYR3	ryanodine receptor 3	70.3331496860558	1.66609598564822	1.80738866168722e-10
ENSG00000160293	7410	VAV2	vav guanine nucleotide exchange factor 2	1325.09957130276	0.378540610336558	1.83301717864146e-10
ENSG00000163682	6133	RPL9	ribosomal protein L9	4153.78811366346	-0.255693353584895	1.85867202064456e-10
ENSG00000205795	192668	CYS1	cystin 1	142.271698079438	-1.08701997328072	1.85874692366444e-10
ENSG00000142230	10055	SAE1	SUMO1 activating enzyme subunit 1	4909.19736043145	-0.210188391247397	1.90791098262968e-10
ENSG00000077380	1781	DYNC1I2	dynein cytoplasmic 1 intermediate chain 2	1261.2288542502	-0.371810770456138	1.99236912407331e-10
ENSG00000096092	28978	TMEM14A	transmembrane protein 14A	511.64963909344	-0.591616374478739	2.00356044918038e-10
ENSG00000188483	389792	IER5L	immediate early response 5 like	774.720785344692	0.46759953892075	2.05984726146144e-10
ENSG00000116096	6697	SPR	sepiapterin reductase	348.018041985127	-0.730269108043613	2.12318033436553e-10
ENSG00000108840	10014	HDAC5	histone deacetylase 5	1238.29650296823	-0.41193339508589	2.12457211648539e-10
ENSG00000116459	515	ATP5PB	ATP synthase peripheral stalk-membrane subunit b	3160.8709735156	-0.259224026558579	2.13481792122474e-10
ENSG00000120438	6950	TCP1	t-complex 1	8031.55259757896	-0.213644206493049	2.14859046953094e-10
ENSG00000107521	3257	HPS1	HPS1, biogenesis of lysosomal organelles complex 3 subunit 1	999.193504055418	0.446702360789056	2.15542353019733e-10
ENSG00000155115	112495	GTF3C6	general transcription factor IIIC subunit 6	1318.04646846758	-0.377612351169855	2.17296744592127e-10
ENSG00000145675	5295	PIK3R1	phosphoinositide-3-kinase regulatory subunit 1	1563.74854621255	-0.336922426778058	2.19329548644422e-10
ENSG00000068878	23198	PSME4	proteasome activator subunit 4	2106.74109547895	-0.290741779956297	2.20241967683943e-10
ENSG00000238227	90120	TMEM250	transmembrane protein 250	1193.92134489467	0.414614584981715	2.23195864620912e-10
ENSG00000182168	8633	UNC5C	unc-5 netrin receptor C	1355.53454103724	0.369301828958911	2.26971145340173e-10
ENSG00000182541	3985	LIMK2	LIM domain kinase 2	438.165374236769	-0.622915842893143	2.28854221745229e-10
ENSG00000132383	6117	RPA1	replication protein A1	3671.4381715213	-0.233396982569291	2.2906779756286e-10
ENSG00000161204	55324	ABCF3	ATP binding cassette subfamily F member 3	840.791471411072	0.468413640763312	2.29092897460468e-10
ENSG00000110841	8496	PPFIBP1	PPFIA binding protein 1	1443.42702904899	0.345326916022846	2.30905732227644e-10
ENSG00000109814	7358	UGDH	UDP-glucose 6-dehydrogenase	909.846060748423	-0.451168368728769	2.33259074714375e-10
ENSG00000117226	2635	GBP3	guanylate binding protein 3	179.223304230179	-0.968192028510893	2.34441121297994e-10
ENSG00000112308	81688	C6orf62	chromosome 6 open reading frame 62	5439.66629982873	-0.217187400403057	2.35796792847637e-10
ENSG00000102048	140462	ASB9	ankyrin repeat and SOCS box containing 9	196.748807918741	-0.902813108468992	2.35910937659969e-10
ENSG00000105401	11140	CDC37	cell division cycle 37	1694.97375923399	0.347572970834664	2.35910937659969e-10
ENSG00000164638	222962	SLC29A4	solute carrier family 29 member 4	290.969206232714	-0.789137188627673	2.42109646181421e-10
ENSG00000133226	10250	SRRM1	serine and arginine repetitive matrix 1	1792.9245497015	-0.329859930063005	2.42947173249635e-10
ENSG00000231131	101928687	LINC01468	long intergenic non-protein coding RNA 1468	222.461674266107	0.87434749024531	2.43594425441838e-10
ENSG00000116237	23463	ICMT	isoprenylcysteine carboxyl methyltransferase	3344.61469680733	-0.247566253348851	2.43602018370625e-10
ENSG00000198689	10479	SLC9A6	solute carrier family 9 member A6	1054.37739004444	-0.425534394250515	2.43708402129333e-10
ENSG00000110492	4192	MDK	midkine	368.005005062325	0.694701619936038	2.44883959117652e-10
ENSG00000141741	84299	MIEN1	migration and invasion enhancer 1	669.846760685572	-0.512258864345324	2.51933147964705e-10
ENSG00000148824	92170	MTG1	mitochondrial ribosome associated GTPase 1	72.8919399629999	1.63934658776273	2.52159533312557e-10
ENSG00000141526	9123	SLC16A3	solute carrier family 16 member 3	2747.24462752115	-0.284085916383428	2.54019895165719e-10
ENSG00000158792	124044	SPATA2L	spermatogenesis associated 2 like	222.169196958911	0.881911248694762	2.63246934929905e-10
ENSG00000093144	55862	ECHDC1	ethylmalonyl-CoA decarboxylase 1	1820.08878337949	-0.325577661347083	2.6340049260881e-10
ENSG00000176593	100128398	LOC100128398	uncharacterized LOC100128398	93.7563000138347	1.40493179233557	2.64581985084908e-10
ENSG00000067064	3422	IDI1	isopentenyl-diphosphate delta isomerase 1	1108.33483261766	-0.396365359053909	2.70257937724974e-10
ENSG00000143549	7170	TPM3	tropomyosin 3	7544.10030627082	-0.177418422921558	2.7687310382953e-10
ENSG00000108262	28964	GIT1	GIT ArfGAP 1	1525.98427752543	0.355690537977234	2.78380863453319e-10
ENSG00000178188	25970	SH2B1	SH2B adaptor protein 1	679.617173105617	0.506810900259619	2.78801631389575e-10
ENSG00000170113	123606	NIPA1	NIPA magnesium transporter 1	910.188793912342	0.444077549706449	2.86068711202476e-10
ENSG00000149273	6188	RPS3	ribosomal protein S3	7677.40818368761	-0.180504761713678	2.86412569032453e-10
ENSG00000261824	148189	LINC00662	long intergenic non-protein coding RNA 662	407.715688915163	0.639468786422088	2.87999944675059e-10
ENSG00000115816	10153	CEBPZ	CCAAT enhancer binding protein zeta	761.942457293511	-0.463285987573234	2.91654007133659e-10
ENSG00000081791	9812	DELE1	DAP3 binding cell death enhancer 1	695.065837569455	0.51438059945505	2.94455329882019e-10
ENSG00000111737	11021	RAB35	RAB35, member RAS oncogene family	1050.34913285077	0.403505122996208	2.98039912247278e-10
ENSG00000154222	200014	CC2D1B	coiled-coil and C2 domain containing 1B	1638.04768364166	0.361002923745984	3.00376718542403e-10
ENSG00000117143	6675	UAP1	UDP-N-acetylglucosamine pyrophosphorylase 1	1436.28956783992	-0.344899791345227	3.06256981489531e-10
ENSG00000218226	100272205	TATDN2P2	TatD DNase Domain Containing 2 Pseudogene 2	95.7086471456071	1.38894259700445	3.07891055397563e-10
ENSG00000112695	1347	COX7A2	cytochrome c oxidase subunit 7A2	2167.45820932912	-0.315747770419581	3.13980459433209e-10
ENSG00000162408	79707	NOL9	nucleolar protein 9	476.159411337931	-0.587707104060658	3.27918255295915e-10
ENSG00000152527	130271	PLEKHH2	pleckstrin homology, MyTH4 and FERM domain containing H2	292.060779202034	0.750337258095572	3.28704997815916e-10
[truncated: 1,360 more rows]
